# Supplementary material
Source: publisher site journal article supplement (https://www.spandidos-publications.com/4311/downloadSupplementary)
Supplement: Supplementary file 1 [file downloadSupplementary]

## Sheet: A.Pathways Pea1_IGFBP6_Vs_Pea1
Table SIII. GSEA pathways and hallmarks in PEA1 IGFBP6 cells vs. PEA1 cells, and PEA2 IGFBP6 cells vs. PEA2 cells.
A, GSEA pathways in PEA1 cells treated with IGFBP6 vs. PEA1 Ctrl cells (P<0.05)
ID	Description	setSize	enrichmentScore	NES	pvalue	leading_edge	core_enrichment
PHONG_TNF_TARGETS_UP	PHONG_TNF_TARGETS_UP	57	0.826954	2.8745	1e-10	tags=44%, list=4%, signal=42%	EGR1/FOS/DUSP1/CXCL2/IER3/JUN/CXCL8/JUNB/BHLHE40/ATF3/IL6/IER2/NUAK2/ZFP36/DUSP5/NFKBIA/EPHA2/KLF10/CXCL1/NFKB2/GEM/DUSP10/KLF6/PLK2/SDC4
NAGASHIMA_EGF_SIGNALING_UP	NAGASHIMA_EGF_SIGNALING_UP	55	0.828823	2.86049	1e-10	tags=49%, list=5%, signal=47%	EGR1/FOS/DUSP1/IER3/JUN/JUNB/BHLHE40/ATF3/HBEGF/HES1/FOSB/IER2/CCN1/ZFP36/DUSP5/EPHA2/KLF10/SIK1/DNAJB1/GEM/EDN1/FOSL1/NAB2/ID1/KLF6/MYC/TIPARP
AMIT_EGF_RESPONSE_40_HELA	AMIT_EGF_RESPONSE_40_HELA	41	0.826045	2.73858	1e-10	tags=44%, list=5%, signal=42%	EGR1/DUSP1/IER3/JUN/JUNB/ATF3/IL6/HES1/PPP1R15A/IER2/ZFP36/DUSP5/PIP5K1A/ID1/BTG2/CBX4/KLF6/PIAS1
PID_AP1_PATHWAY	PID_AP1_PATHWAY	65	0.762388	2.69242	1e-10	tags=34%, list=5%, signal=32%	EGR1/FOS/DUSP1/JUN/CXCL8/JUNB/ATF3/IL6/FOSB/MAFG/CCN1/MT2A/EDN1/NFATC3/ACTA1/CRTC1/FOSL1/CBFB/HLA-A/MYC/TRIP6/EP300
NAGASHIMA_NRG1_SIGNALING_UP	NAGASHIMA_NRG1_SIGNALING_UP	166	0.644165	2.66569	1e-10	tags=30%, list=8%, signal=28%	EGR1/FOS/DUSP1/IER3/JUN/JUNB/BHLHE40/ATF3/GDF15/SLCO4A1/HBEGF/HES1/FOSB/ADM/PPP1R15A/IER2/DDIT3/CCN1/ZFP36/DUSP5/EPHA2/KLF10/SIK1/CYP24A1/DNAJB1/GEM/CLCF1/EDN1/JMJD6/SFN/ZYX/PFKFB3/DUSP10/FOSL1/NAB2/ID1/AKIRIN1/CTTN/KLF6/NFIL3/MYC/TIPARP/NDEL1/CCNL1/EIF5/GADD45A/SPRR1B/TNFRSF10B/ATG101/CAMK2G
BURTON_ADIPOGENESIS_PEAK_AT_2HR	BURTON_ADIPOGENESIS_PEAK_AT_2HR	46	0.787916	2.63574	1e-10	tags=39%, list=4%, signal=38%	FOS/DUSP1/CXCL2/IER3/JUNB/IL6/FOSB/ADM/PPP1R15A/CCN1/ZFP36/PHLDA1/SERPINE1/DNAJB1/BTG2/DNAJB6/MYC/ERRFI1
RASHI_RESPONSE_TO_IONIZING_RADIATION_1	RASHI_RESPONSE_TO_IONIZING_RADIATION_1	35	0.802564	2.58129	1.28401e-10	tags=23%, list=0%, signal=23%	EGR1/FOS/DUSP1/IER3/JUN/ATF3/IER2/ZFP36
UZONYI_RESPONSE_TO_LEUKOTRIENE_AND_THROMBIN	UZONYI_RESPONSE_TO_LEUKOTRIENE_AND_THROMBIN	36	0.785804	2.53179	6.24711e-10	tags=33%, list=2%, signal=33%	EGR1/DUSP1/CXCL2/CXCL8/ATF3/HBEGF/CCN1/ZFP36/ADAMTS1/KCNJ2/SIK1/GEM
AMIT_EGF_RESPONSE_60_MCF10A	AMIT_EGF_RESPONSE_60_MCF10A	39	0.768861	2.50268	1.35612e-09	tags=33%, list=4%, signal=32%	EGR1/CXCL2/IER3/JUN/CXCL8/JUNB/BHLHE40/IL6/HES1/IER2/CCN1/ID1/PLK2
PLASARI_TGFB1_TARGETS_1HR_UP	PLASARI_TGFB1_TARGETS_1HR_UP	33	0.780741	2.47604	2.52787e-09	tags=39%, list=3%, signal=38%	IER3/JUNB/BHLHE40/IL6/HBEGF/CSRNP1/HES1/NUAK2/KLF10/SMAD7/SERPINE1/SPSB1/ID1
GESERICK_TERT_TARGETS_DN	GESERICK_TERT_TARGETS_DN	21	0.878181	2.46558	3.59928e-10	tags=52%, list=4%, signal=50%	IER3/JUNB/BHLHE40/DUSP6/HBEGF/FOSB/ZFP36/KLF10/BTG2/NFIL3/ERRFI1
AMIT_DELAYED_EARLY_GENES	AMIT_DELAYED_EARLY_GENES	18	0.900395	2.42824	1.31822e-09	tags=67%, list=5%, signal=63%	JUNB/BHLHE40/ATF3/HES1/ZFP36/KLF10/FOSL1/NAB2/ID1/BTG2/KLF6/PIAS1
DIRMEIER_LMP1_RESPONSE_EARLY	DIRMEIER_LMP1_RESPONSE_EARLY	59	0.691915	2.42634	6.38142e-10	tags=39%, list=9%, signal=36%	EGR1/TNF/JUN/JUNB/PPP1R15A/IER2/ZFP36/DUSP5/NFKBIA/NFKB2/TNFSF9/SEC24C/PTK2B/BTG2/KLF6/MYC/HSP90AB1/CCL4/NPPB/EIF1/JUP/ZC3H12A/RPS16
PID_ATF2_PATHWAY	PID_ATF2_PATHWAY	58	0.689291	2.40608	8.20281e-10	tags=33%, list=9%, signal=30%	FOS/DUSP1/JUN/CXCL8/JUNB/ATF3/IL6/HES1/DDIT3/DUSP5/SOCS3/DUSP10/CBFB/EP300/BCL2/HRK/POU2F1/GADD45A/BCL2L1
ZHOU_TNF_SIGNALING_30MIN	ZHOU_TNF_SIGNALING_30MIN	50	0.697909	2.37417	1.51795e-08	tags=24%, list=1%, signal=24%	EGR1/DUSP1/JUNB/IER2/CCN1/NFKBIA/TAGLN2/HMGA1/KLF10/CXCL1/PTMS/PDIA3P1
KIM_WT1_TARGETS_UP	KIM_WT1_TARGETS_UP	204	0.560763	2.37057	1e-10	tags=27%, list=10%, signal=25%	EGR1/IER3/CXCL8/JUNB/BHLHE40/HBEGF/IER2/CCN1/SH2B2/DUSP5/SPRY2/NFKBIA/HMGA1/EPHA2/ARAP2/KLF10/SF1/OTUD4/TRIO/NFKB2/SOX9/UCP2/SERPINE1/GEM/SFN/ATP1B1/DAPK3/ZYX/PCDH7/FOSL1/PDE10A/SHB/CSF1/BAZ1A/PTPRE/CBFB/SDC4/GTF2IRD1/MYC/ENO2/RAB15/SENP5/BAIAP2/SMAD3/TMC6/PRR5/CHST3/TRAF3/EVI2B/SPRR1B/ATG101/CDC42SE1/BMPR2/WWTR1/FHL2/APP
TIAN_TNF_SIGNALING_NOT_VIA_NFKB	TIAN_TNF_SIGNALING_NOT_VIA_NFKB	22	0.832576	2.3658	2.17717e-08	tags=41%, list=5%, signal=39%	EGR1/IER3/JUN/JUNB/FOSB/PPP1R15A/KLF10/KLF6/TIPARP
HAHTOLA_MYCOSIS_FUNGOIDES_CD4_UP	HAHTOLA_MYCOSIS_FUNGOIDES_CD4_UP	57	0.677723	2.35577	5.55089e-09	tags=28%, list=6%, signal=26%	EGR1/CXCL2/IER3/CXCL8/ATF3/HBEGF/ADM/PPP1R15A/CXCL1/SULT1A2/IL1B/PFKFB3/BTG2/KLF6/GLUL/CCL4
KOBAYASHI_EGFR_SIGNALING_6HR_DN	KOBAYASHI_EGFR_SIGNALING_6HR_DN	17	0.881452	2.33732	5.06665e-09	tags=41%, list=3%, signal=40%	IER3/JUN/DUSP6/CCN1/DUSP5/EPHA2/FOSL1
AMIT_SERUM_RESPONSE_40_MCF10A	AMIT_SERUM_RESPONSE_40_MCF10A	27	0.780303	2.33601	3.16289e-07	tags=44%, list=6%, signal=42%	EGR1/FOS/DUSP1/CXCL2/JUN/ATF3/FOSB/ADM/ZFP36/KLF6/GLUL/TP63
CROONQUIST_STROMAL_STIMULATION_UP	CROONQUIST_STROMAL_STIMULATION_UP	52	0.677767	2.32513	3.3115e-08	tags=25%, list=3%, signal=24%	FOS/DUSP1/CXCL2/IER3/IL6/FOSB/PPP1R15A/IER2/NFKBIA/CXCL1/SERPINE1/IGFBP4/ID1
AMIT_EGF_RESPONSE_40_MCF10A	AMIT_EGF_RESPONSE_40_MCF10A	16	0.887998	2.32113	5.97492e-09	tags=50%, list=4%, signal=48%	EGR1/FOS/JUN/ADM/CCN1/ZFP36/DUSP5/KLF6
OSWALD_HEMATOPOIETIC_STEM_CELL_IN_COLLAGEN_GEL_UP	OSWALD_HEMATOPOIETIC_STEM_CELL_IN_COLLAGEN_GEL_UP	205	0.54689	2.3132	1e-10	tags=22%, list=10%, signal=20%	EGR1/FOS/DUSP1/CXCL2/TNF/IER3/JUN/CXCL8/JUNB/ATF3/IL6/FOSB/PPP1R15A/IER2/ZFP36/SPRY2/NFKBIA/AKAP13/CXCL1/KCNJ2/GATAD2A/SPSB1/KDM4B/IL1B/SSB/VPS37B/PHF14/BTG2/KLF6/PLK2/FAM117A/TIPARP/GPS2/PEG10/CCL4/DHRS9/SMC3/BAG5/TAC3/RCC1/GALNT2/ZC3H12A/LUC7L3/F7/HIPK1/AGAP1
SESTO_RESPONSE_TO_UV_C3	SESTO_RESPONSE_TO_UV_C3	18	0.856856	2.31082	1.78271e-07	tags=39%, list=2%, signal=38%	DUSP1/IER3/CXCL8/ATF3/HBEGF/SOX9/IL1B
ZWANG_CLASS_3_TRANSIENTLY_INDUCED_BY_EGF	ZWANG_CLASS_3_TRANSIENTLY_INDUCED_BY_EGF	214	0.540292	2.30047	1e-10	tags=29%, list=14%, signal=26%	FOS/DUSP1/CXCL2/IER3/CXCL8/JUNB/BHLHE40/ATF3/IL6/HBEGF/CSRNP1/HES1/FOSB/ADM/PPP1R15A/DUSP5/EPHA2/CXCL1/SMAD7/CSNK1E/CLDND1/NFKB2/SERPINE1/SIK1/GEM/EDN1/METRNL/SOCS3/IL1B/PFKFB3/SYT12/PLK2/TGIF1/TIPARP/CPEB2/DCUN1D3/SBNO2/DUSP14/TP63/CCNL1/ITPRIP/RIPK4/PSD3/ZC3H12A/MIR106B/BCL3/SERTAD2/ATXN1/FOXA1/IGF1R/TOB1/IFNE/VGLL3/MYADM/MTM1/MAFK/NCL/EIF2AK3/IPPK/ARL5B/PYGM/MCL1/BIRC3
PEDERSEN_METASTASIS_BY_ERBB2_ISOFORM_1	PEDERSEN_METASTASIS_BY_ERBB2_ISOFORM_1	43	0.689025	2.29444	3.05138e-07	tags=30%, list=5%, signal=29%	EGR1/BHLHE40/DUSP6/HBEGF/SPRY4/DUSP5/PHLDA1/EPHA2/GEM/FOSL1/ERRFI1/ADGRG6/CAPN8
PRAMOONJAGO_SOX4_TARGETS_UP	PRAMOONJAGO_SOX4_TARGETS_UP	51	0.672058	2.29044	6.58231e-08	tags=31%, list=8%, signal=29%	IER3/JUN/BHLHE40/GDF15/ADM/PHF1/SERPINE1/IL1B/NAB2/RBCK1/NFIL3/TIPARP/CCNL1/AK4/RIT1/CCNG2
DAZARD_UV_RESPONSE_CLUSTER_G2	DAZARD_UV_RESPONSE_CLUSTER_G2	28	0.75831	2.28602	7.15301e-07	tags=29%, list=4%, signal=27%	CXCL2/IER3/CXCL8/JUNB/ATF3/LY6E/CSRP1/UBE2S
BILD_HRAS_ONCOGENIC_SIGNATURE	BILD_HRAS_ONCOGENIC_SIGNATURE	236	0.52943	2.27672	1e-10	tags=28%, list=15%, signal=24%	EGR1/FOS/DUSP1/CXCL2/IER3/CXCL8/JUNB/DUSP6/GDF15/VANGL2/HBEGF/SPRY4/NAV3/PPP1R15A/IER2/PPIF/ZFP36/DUSP5/EPHA2/CXCL1/CSNK1E/MMP14/FLNB/CLCF1/SFN/IL1B/DENND2B/KMT2C/FOSL1/SMTN/SREK1IP1/PTPRE/KLF6/SDC4/PIAS1/BCL6/LHFPL2/MTCL1/ADAM8/LATS1/SESN2/CCNL1/LRP8/SEMA4B/ITPRIP/ARHGAP25/TNFRSF10B/FBXO9/PIK3CD/CDCP1/FLRT3/MAP1LC3B/GAS1/KDM7A/CSNK1D/COL12A1/RRP9/LDLR/LRAT/DDX17/HK2/STX1A/MCL1/MXD1/PIM1/FN1
JECHLINGER_EPITHELIAL_TO_MESENCHYMAL_TRANSITION_DN	JECHLINGER_EPITHELIAL_TO_MESENCHYMAL_TRANSITION_DN	60	0.646898	2.26711	7.92224e-08	tags=40%, list=11%, signal=36%	EGR1/FOS/DUSP1/ATF3/ZFP36/KLF10/ARHGEF1/GRB7/CHKA/ID1/BTG2/IRF6/PLK2/PC/MYH9/AMD1/BCL6/NUMB/EPCAM/ATP1A1/JUP/TGM2/STAT5A/KLF2
WP_ARYL_HYDROCARBON_RECEPTOR_PATHWAY	WP_ARYL_HYDROCARBON_RECEPTOR_PATHWAY	41	0.682921	2.26408	1.5173e-06	tags=29%, list=7%, signal=27%	TNF/JUN/JUNB/HES1/BAX/SRC/IL1B/NCOA1/EP300/HSP90AA1/UGT1A4/CYP1A1
SMIRNOV_RESPONSE_TO_IR_2HR_UP	SMIRNOV_RESPONSE_TO_IR_2HR_UP	51	0.660996	2.25274	1.7553e-07	tags=29%, list=4%, signal=28%	IER3/JUN/ATF3/GDF15/PPP1R15A/PCIF1/RNF19B/SOX9/TNFSF9/PPM1D/SLC30A1/ELK4/FOSL1/PHF14/PLK2
WEIGEL_OXIDATIVE_STRESS_RESPONSE	WEIGEL_OXIDATIVE_STRESS_RESPONSE	32	0.712917	2.24259	2.23623e-06	tags=59%, list=20%, signal=47%	FOS/IER3/HMGA1/BAX/NFIX/ARHGDIA/MCM4/ID1/AMPH/APP/ADORA1/CAPNS1/IGFBP2/CCNA2/DNPH1/GNAS/DAPK1/CUX1/POLD1
AMIT_EGF_RESPONSE_120_HELA	AMIT_EGF_RESPONSE_120_HELA	63	0.632188	2.2263	7.18776e-08	tags=33%, list=8%, signal=31%	CXCL2/CXCL8/DUSP6/GDF15/HBEGF/EPHA2/CXCL1/MVD/GEM/CLCF1/VPS37B/FOSL1/NAB2/MATK/NDEL1/CYTH1/CHST3/GADD45A/OGFR/TNFRSF10B/JUP
MCDOWELL_ACUTE_LUNG_INJURY_UP	MCDOWELL_ACUTE_LUNG_INJURY_UP	43	0.666145	2.21825	1.68467e-06	tags=28%, list=5%, signal=27%	FOS/DUSP1/CCN1/ZFP36/NFKBIA/SFN/COL3A1/BTG2/KLF6/MYC/LTF/TNC
DASU_IL6_SIGNALING_UP	DASU_IL6_SIGNALING_UP	56	0.637744	2.20858	4.76882e-07	tags=38%, list=14%, signal=32%	IER3/CXCL8/IL6/AGRN/ZFP36/MAP2K2/LY6E/GEM/PLEC/FAM189B/DNM2/GAS6/SREBF1/TAPBP/VEGFB/ENG/COL6A1/PTGES/FASN/NAGPA/SORBS3
GROSS_HYPOXIA_VIA_ELK3_DN	GROSS_HYPOXIA_VIA_ELK3_DN	151	0.538212	2.20119	1.67193e-09	tags=22%, list=8%, signal=20%	EGR1/FOS/CXCL2/BHLHE40/IL6/VANGL2/HBEGF/CSRNP1/ADM/PPP1R15A/CCN1/ZFP36/SPRY2/NFKBIA/ATXN2L/EDN1/PFKFB3/SKIL/KLF6/PLK2/TGIF1/NFIL3/MYC/ERRFI1/MYH9/SMOX/VWA1/TNC/PNRC1/PIM3/DHRS9/PRDM2/GADD45A
BIOCARTA_NTHI_PATHWAY	BIOCARTA_NTHI_PATHWAY	22	0.77436	2.20037	2.20409e-06	tags=32%, list=5%, signal=30%	DUSP1/TNF/CXCL8/NFKBIA/IL1B/EP300/SMAD3
SUBTIL_PROGESTIN_TARGETS	SUBTIL_PROGESTIN_TARGETS	33	0.692584	2.19646	5.69914e-06	tags=21%, list=2%, signal=21%	DUSP1/JUN/ATF3/CCN1/ABCC5/SOS1/MAP3K3
REACTOME_NGF_STIMULATED_TRANSCRIPTION	REACTOME_NGF_STIMULATED_TRANSCRIPTION	37	0.683627	2.19621	3.73715e-06	tags=30%, list=5%, signal=28%	EGR1/FOS/JUNB/FOSB/CDK5R2/FOSL1/REST/NAB2/ID1/DNM2/EP300
BLANCO_MELO_COVID19_SARS_COV_2_LOW_MOI_INFECTION_A594_ACE2_EXPRESSING_CELLS_UP	BLANCO_MELO_COVID19_SARS_COV_2_LOW_MOI_INFECTION_A594_ACE2_EXPRESSING_CELLS_UP	155	0.530371	2.17842	2.78008e-09	tags=23%, list=12%, signal=21%	EGR1/FOS/CXCL2/TNF/IER3/CXCL8/JUNB/ATF3/CSRNP1/FOSB/PPP1R15A/IER2/DDIT3/ZFP36/NFKBIA/KLF10/CXCL1/SOCS3/ZNF596/ID1/NFIL3/CCL4/CCNL1/RLF/LTB/ZC3H12A/ZNF830/BCL3/SERTAD2/FGG/SIX4/EFNA1/HLA-B/DUSP8/INO80D/GRHL1
BROWNE_HCMV_INFECTION_30MIN_UP	BROWNE_HCMV_INFECTION_30MIN_UP	49	0.641216	2.1761	1.44385e-06	tags=35%, list=11%, signal=31%	FOS/DUSP1/JUNB/ZFP36/NFATC3/SOCS3/PTK2B/COL6A2/EYA4/ZER1/TSFM/CAMK2G/SMARCD2/IFNAR2/CBARP/COL6A1/PTK7
GROSS_HYPOXIA_VIA_HIF1A_DN	GROSS_HYPOXIA_VIA_HIF1A_DN	106	0.561994	2.1743	8.34278e-08	tags=25%, list=6%, signal=23%	FOS/BHLHE40/HBEGF/CSRNP1/ADM/CCN1/ZFP36/SPRY2/NFKBIA/KLF10/MT1A/EDN1/PFKFB3/SKIL/SHB/TGIF1/ERRFI1/DNAJC5/MYH9/ZNF143/LRP5/ENO2/VWA1/PNRC1/DUSP14/PIM3
SAGIV_CD24_TARGETS_DN	SAGIV_CD24_TARGETS_DN	44	0.653444	2.17307	1.79033e-06	tags=23%, list=4%, signal=22%	CXCL8/ATF3/GDF15/PPP1R15A/DUSP5/GEM/TRAFD1/EMP3/CTTN/PLPPR2
BIOCARTA_CDMAC_PATHWAY	BIOCARTA_CDMAC_PATHWAY	15	0.839452	2.17224	3.96797e-06	tags=33%, list=4%, signal=32%	FOS/TNF/JUN/NFKBIA/MYC
GARGALOVIC_RESPONSE_TO_OXIDIZED_PHOSPHOLIPIDS_BLUE_UP	GARGALOVIC_RESPONSE_TO_OXIDIZED_PHOSPHOLIPIDS_BLUE_UP	127	0.546109	2.17085	6.42297e-09	tags=34%, list=13%, signal=30%	CXCL8/ATF3/HBEGF/MAFG/DDIT3/KLHL21/ZNRF3/SERTAD1/PHF1/N4BP2L2/SRXN1/TNFSF9/STIP1/DNAJB1/JMJD6/CBLL1/SOS1/BANP/FOSL1/DNAJA1/DNAJB6/NFIL3/TMEM217/SESN2/KIF1B/KANSL1L/EIF5/RNF24/BACH1/CHORDC1/CCNG2/BRF2/EID3/AKIRIN2/MAP1LC3B/AHSA1/KIF21A/ZNF394/MTHFD2L/KDM7A/MAFK/TSC22D3/PXDC1
GALINDO_IMMUNE_RESPONSE_TO_ENTEROTOXIN	GALINDO_IMMUNE_RESPONSE_TO_ENTEROTOXIN	75	0.591611	2.16655	4.5147e-07	tags=29%, list=8%, signal=27%	DUSP1/TNF/IER3/JUNB/BHLHE40/NFKBIA/PHLDA1/NFKB2/TNFSF9/PKM/SOCS3/IL1B/MT1X/PCDH7/FOSL1/NAB2/PTPRE/ERRFI1/MARCKSL1/TAPBP/PDLIM7/GADD45A
WP_MAPK_PATHWAY_IN_CONGENITAL_THYROID_CANCER	WP_MAPK_PATHWAY_IN_CONGENITAL_THYROID_CANCER	16	0.828283	2.16504	1.10234e-06	tags=31%, list=4%, signal=30%	FOS/JUN/MAP2K2/SOS1/MYC
ONDER_CDH1_TARGETS_3_DN	ONDER_CDH1_TARGETS_3_DN	54	0.630983	2.16377	1.8954e-06	tags=19%, list=3%, signal=18%	CXCL2/CXCL8/DUSP6/HBEGF/NAV3/CXCL1/SOX9/EDN1/IL1B/SPAG1
REACTOME_RAF_INDEPENDENT_MAPK1_3_ACTIVATION	REACTOME_RAF_INDEPENDENT_MAPK1_3_ACTIVATION	23	0.749854	2.15871	1.5547e-05	tags=26%, list=3%, signal=25%	DUSP1/DUSP6/IL6/DUSP5/MAP2K2/DUSP10
GARGALOVIC_RESPONSE_TO_OXIDIZED_PHOSPHOLIPIDS_TURQUOISE_UP	GARGALOVIC_RESPONSE_TO_OXIDIZED_PHOSPHOLIPIDS_TURQUOISE_UP	77	0.58545	2.1543	2.63313e-07	tags=31%, list=9%, signal=29%	EGR1/DUSP1/JUN/GDF15/ZFP36/SPRY2/SLC25A25/KLF10/CLDND1/GCLM/CLIP2/NAB2/KLF6/NIPA1/GAN/DNAJB6/MYC/TIPARP/TNPO1/PIM3/RIT1/CCNG2/CCDC117/HS6ST1
PID_NFAT_TFPATHWAY	PID_NFAT_TFPATHWAY	44	0.647642	2.15378	3.08019e-06	tags=18%, list=3%, signal=18%	EGR1/FOS/TNF/JUN/CXCL8/JUNB/NFATC3/FOSL1
BIOCARTA_ETS_PATHWAY	BIOCARTA_ETS_PATHWAY	17	0.811521	2.15189	3.36546e-06	tags=35%, list=7%, signal=33%	FOS/JUN/SIN3B/NCOR2/CSF1/ETV3
WP_TLR4_SIGNALING_AND_TOLERANCE	WP_TLR4_SIGNALING_AND_TOLERANCE	25	0.731766	2.15184	2.15355e-05	tags=24%, list=8%, signal=22%	TNF/CXCL8/IL6/NFKBIA/TAB1/TRAF3
CROONQUIST_NRAS_VS_STROMAL_STIMULATION_DN	CROONQUIST_NRAS_VS_STROMAL_STIMULATION_DN	94	0.5682	2.15057	1.79168e-07	tags=31%, list=13%, signal=27%	FOS/DUSP1/IER3/JUN/IL6/HES1/FOSB/PPP1R15A/IER2/NFKBIA/FOXM1/RECQL4/H2BC11/IGFBP4/ID1/TPX2/BCL6/SBNO2/MCM2/TPM2/PTP4A3/H2AX/TROAP/PIM2/ARHGAP11A/PTGER3/TSC22D3/LAMB1/ITM2A
WP_CYTOKINES_AND_INFLAMMATORY_RESPONSE	WP_CYTOKINES_AND_INFLAMMATORY_RESPONSE	24	0.736866	2.1463	2.99498e-05	tags=33%, list=9%, signal=30%	CXCL2/TNF/IL6/CXCL1/IL1B/CSF1/HLA-DRB1/IL3
WP_PHOTODYNAMIC_THERAPYINDUCED_AP1_SURVIVAL_SIGNALING	WP_PHOTODYNAMIC_THERAPYINDUCED_AP1_SURVIVAL_SIGNALING	46	0.640879	2.14387	2.00274e-06	tags=43%, list=15%, signal=37%	FOS/TNF/JUN/JUNB/IL6/HBEGF/BAX/MAP2K7/TRAF2/HSP90AA1/BCL2/TRAF5/BCL2L1/BCL3/FAS/TNFRSF1A/MAP3K5/MCL1/MAP2K3/CCNA2
TIAN_TNF_SIGNALING_VIA_NFKB	TIAN_TNF_SIGNALING_VIA_NFKB	23	0.744544	2.14343	2.20549e-05	tags=39%, list=4%, signal=38%	CXCL2/CXCL8/IL6/ZFP36/NFKBIA/CXCL1/NFKB2/PLK2/SDC4
LIU_IL13_PRIMING_MODEL	LIU_IL13_PRIMING_MODEL	14	0.837736	2.13068	7.34469e-06	tags=36%, list=3%, signal=35%	EGR1/FOS/SERTAD1/JMJD6/EMP3
PID_ERBB1_DOWNSTREAM_PATHWAY	PID_ERBB1_DOWNSTREAM_PATHWAY	101	0.557954	2.12886	1.5604e-07	tags=29%, list=13%, signal=25%	EGR1/FOS/DUSP1/JUN/DUSP6/ZFP36/YWHAE/MAP2K2/SOS1/SFN/SRC/VAV2/ARF4/PEBP1/PIK3R1/MAPK7/MAP2K5/BAIAP2/RIN1/GAB1/BCL2L1/PIK3CD/GRB2/PPP2CA/WASF2/PPP2R2A/AKT1/PPP2R1A/PIK3R3
WP_LTF_DANGER_SIGNAL_RESPONSE_PATHWAY	WP_LTF_DANGER_SIGNAL_RESPONSE_PATHWAY	18	0.788853	2.12743	3.20497e-05	tags=28%, list=5%, signal=26%	TNF/CXCL8/IL6/IL1B/LTF
AMIT_EGF_RESPONSE_120_MCF10A	AMIT_EGF_RESPONSE_120_MCF10A	39	0.65332	2.12659	2.19289e-05	tags=36%, list=8%, signal=33%	DUSP6/GDF15/HBEGF/SPRY4/BAX/EPHA2/CDV3/IL1B/FOSL1/TRIM21/TESK1/LSM4/AP1S1/EIF1
GRAHAM_CML_QUIESCENT_VS_CML_DIVIDING_UP	GRAHAM_CML_QUIESCENT_VS_CML_DIVIDING_UP	23	0.737294	2.12256	3.70608e-05	tags=22%, list=2%, signal=21%	CXCL2/JUN/CXCL8/CXCL1/IL1B
AMIT_EGF_RESPONSE_480_HELA	AMIT_EGF_RESPONSE_480_HELA	156	0.515241	2.11879	2.0993e-08	tags=35%, list=15%, signal=30%	HBEGF/AGRN/PPIF/HMGA1/MT2A/ARHGDIA/TRIO/NFKB2/LY6E/SERPINE1/GPAA1/MTA1/FXR2/MT1H/SFN/B4GALT1/CDV3/FAM214B/DAPK3/ZYX/MT1X/RNF126/DLGAP4/USF2/SMTN/IGFBP4/PLEC/TSPAN14/PMEPA1/LTBR/MTAP/NET1/MYO9B/ARHGEF2/SERPINH1/PPDPF/SLC19A1/PDLIM7/PICALM/MAD1L1/BCL2L1/TGM2/TUBB4B/MT1F/LPCAT4/PGAP6/RRBP1/DPAGT1/KRT17/DUSP7/PTPRF/XAB2/SORBS3/MAP2K3/CD44
PID_FRA_PATHWAY	PID_FRA_PATHWAY	35	0.65813	2.11675	5.38933e-05	tags=23%, list=5%, signal=22%	JUN/CXCL8/JUNB/IL6/NFATC3/USF2/FOSL1/EP300
WP_SIGNAL_TRANSDUCTION_THROUGH_IL1R	WP_SIGNAL_TRANSDUCTION_THROUGH_IL1R	31	0.681237	2.1159	8.63482e-06	tags=23%, list=7%, signal=21%	TNF/JUN/IL6/NFKBIA/IL1B/TOLLIP/TAB1
GINESTIER_BREAST_CANCER_ZNF217_AMPLIFIED_DN	GINESTIER_BREAST_CANCER_ZNF217_AMPLIFIED_DN	314	0.480706	2.11565	1e-10	tags=39%, list=18%, signal=33%	AGRN/PRRC2A/SMG7/ZNF598/SNRNP70/KCTD13/HDAC7/SF1/HSF4/ATXN2L/TBC1D22B/TAF15/NCKAP5L/DENND4B/CSNK1E/ACIN1/FURIN/ARHGEF11/MYPOP/MAP2K2/GATAD2A/MIIP/TMEM259/PIP5K1A/SH3BP1/SCAF1/FXR2/ATN1/KDM4A/CAPN15/B4GALT1/SAFB2/SH3BP5L/KHDC4/EHMT2/SMG9/ARHGAP17/MAPRE3/FBXO46/SEC61A2/FKBP1A/MAPK8IP3/CPSF7/TSPAN14/SLC23A2/TRAF2/CACTIN/MICALL1/MYO9B/CUL9/ARHGEF2/SETD1A/AP5Z1/RAP1GAP2/GPS2/CIC/CCDC93/SBNO2/HNRNPD/KM…
ADDYA_ERYTHROID_DIFFERENTIATION_BY_HEMIN	ADDYA_ERYTHROID_DIFFERENTIATION_BY_HEMIN	71	0.586861	2.11391	1.63863e-06	tags=18%, list=4%, signal=18%	EGR1/CXCL2/IER3/JUN/CXCL8/ATF3/MAFG/SLC43A3/MT2A/UCP2/NCOA1/NLRP1/KLF6
AMIT_SERUM_RESPONSE_60_MCF10A	AMIT_SERUM_RESPONSE_60_MCF10A	56	0.610308	2.11356	4.59607e-06	tags=27%, list=6%, signal=25%	EGR1/CXCL8/BHLHE40/HBEGF/IER2/CCN1/NUAK2/DUSP5/PIP5K1A/BMP1/ITSN1/PLK2/TGIF1/TNC/PNRC1
BILANGES_SERUM_SENSITIVE_VIA_TSC1	BILANGES_SERUM_SENSITIVE_VIA_TSC1	21	0.752102	2.1116	3.42729e-05	tags=14%, list=1%, signal=14%	EGR1/JUNB/PHLDA1
MISHRA_CARCINOMA_ASSOCIATED_FIBROBLAST_UP	MISHRA_CARCINOMA_ASSOCIATED_FIBROBLAST_UP	24	0.724451	2.11014	6.31318e-05	tags=29%, list=7%, signal=27%	EGR1/FOS/GEM/COL6A2/TNC/SESN2/CTSK
KHETCHOUMIAN_TRIM24_TARGETS_UP	KHETCHOUMIAN_TRIM24_TARGETS_UP	40	0.64115	2.109	2.74912e-05	tags=20%, list=3%, signal=19%	EGR1/FOS/JUNB/HBEGF/UCP2/SERPINE1/SAMD4A/BTG2
WINZEN_DEGRADED_VIA_KHSRP	WINZEN_DEGRADED_VIA_KHSRP	95	0.555211	2.10664	1.78319e-07	tags=20%, list=5%, signal=19%	CXCL2/TNF/CXCL8/DUSP6/GDF15/IL6/HBEGF/SPRY4/CCN1/ZFP36/DUSP5/SPRY2/CYP24A1/GEM/EDN1/SCG5/SDC4/ERRFI1/IRS1
SARTIPY_BLUNTED_BY_INSULIN_RESISTANCE_UP	SARTIPY_BLUNTED_BY_INSULIN_RESISTANCE_UP	17	0.794394	2.10648	1.11937e-05	tags=53%, list=7%, signal=49%	CXCL2/JUNB/SERPINE1/SOCS3/MT1X/SKIL/NAB2/NFIL3/AK4
WP_PHOTODYNAMIC_THERAPYINDUCED_NFKB_SURVIVAL_SIGNALING	WP_PHOTODYNAMIC_THERAPYINDUCED_NFKB_SURVIVAL_SIGNALING	32	0.669001	2.10445	4.69858e-05	tags=19%, list=2%, signal=18%	CXCL2/TNF/CXCL8/IL6/NFKB2/IL1B
REACTOME_NUCLEAR_EVENTS_KINASE_AND_TRANSCRIPTION_FACTOR_ACTIVATION	REACTOME_NUCLEAR_EVENTS_KINASE_AND_TRANSCRIPTION_FACTOR_ACTIVATION	59	0.599802	2.10332	2.93772e-06	tags=25%, list=6%, signal=24%	EGR1/FOS/JUNB/DUSP6/FOSB/CDK5R2/FOSL1/REST/NAB2/PPP2R5D/ID1/MAPK7/DNM2/EP300/MEF2A
CHEN_LVAD_SUPPORT_OF_FAILING_HEART_UP	CHEN_LVAD_SUPPORT_OF_FAILING_HEART_UP	100	0.551707	2.10229	1.75263e-07	tags=36%, list=15%, signal=31%	JUN/ATF3/SLCO4A1/CCN1/ZFP36/SLC38A2/NFKBIA/MT2A/SERPINE1/MT1H/ACTA1/MT1X/MT1E/BTG2/NFIL3/PIK3R1/TIPARP/AMD1/BCL6/GLUL/RERE/DIXDC1/CYP4B1/CHST3/DDIT4/FSTL3/SH3BGR/MT1F/FNDC3B/KLF2/TSC22D3/LAMB1/MCL1/ELF1/MT1M/ANKRD2
HERNANDEZ_MITOTIC_ARREST_BY_DOCETAXEL_2_DN	HERNANDEZ_MITOTIC_ARREST_BY_DOCETAXEL_2_DN	16	0.804021	2.10162	8.34937e-06	tags=25%, list=0%, signal=25%	EGR1/PPP1R3F/CCN1/SPRY1
BROWNE_HCMV_INFECTION_2HR_UP	BROWNE_HCMV_INFECTION_2HR_UP	35	0.653304	2.10122	6.91547e-05	tags=17%, list=1%, signal=17%	EGR1/FOS/CXCL8/ATF3/NFKBIA/SLC29A1
BROWNE_HCMV_INFECTION_14HR_UP	BROWNE_HCMV_INFECTION_14HR_UP	147	0.516098	2.09729	1.65237e-08	tags=37%, list=14%, signal=32%	FOS/HES1/SMG7/RGS19/SULT1A2/GCLM/PPM1D/ABCC5/JMJD6/NXF1/NFATC3/TAF5/SAFB2/IP6K1/H2BC11/SPAG1/FOXK2/EYA4/BAZ1A/TSPYL2/UBE2S/FEN1/ZNF143/MARCKSL1/AMD1/SYNE2/FZD5/CCDC93/NDEL1/UBN1/PNN/TSFM/RCC1/UPF1/TAF1A/LUC7L3/TAC1/UPF2/HIPK1/HINFP/CBARP/ATP6V0B/PPP2R2A/GRPEL1/GPM6A/RPIA/TSC22D3/PRUNE1/USP1/TENT4A/BRMS1/PDIA4/HMOX1/RSRP1
BIOCARTA_IL1R_PATHWAY	BIOCARTA_IL1R_PATHWAY	28	0.694116	2.0925	5.2003e-05	tags=18%, list=2%, signal=17%	TNF/JUN/IL6/NFKBIA/IL1B
PID_SMAD2_3NUCLEAR_PATHWAY	PID_SMAD2_3NUCLEAR_PATHWAY	79	0.567812	2.09107	1.24376e-06	tags=19%, list=5%, signal=18%	FOS/JUN/ATF3/SIN3B/SMAD7/SERPINE1/DCP1A/NCOA1/MED15/SKIL/CBFB/TGIF1/MYC/EP300/SMAD3
BLANCO_MELO_INFLUENZA_A_INFECTION_A594_CELLS_UP	BLANCO_MELO_INFLUENZA_A_INFECTION_A594_CELLS_UP	35	0.649737	2.08975	8.15547e-05	tags=20%, list=1%, signal=20%	EGR1/CXCL8/DUSP6/HBEGF/DDIT3/TIMD4/KLF10
PHONG_TNF_RESPONSE_VIA_P38_PARTIAL	PHONG_TNF_RESPONSE_VIA_P38_PARTIAL	151	0.510619	2.08835	5.02344e-08	tags=26%, list=11%, signal=23%	DUSP1/CXCL2/IER3/JUN/CXCL8/JUNB/IL6/AGRN/ADM/PPIF/NUAK2/KLHL21/CXCL1/NFKB2/SERPINE1/B4GALT1/PCDH7/DUSP10/MFHAS1/ID1/BAZ1A/KLF6/PLK2/PITX2/TIPARP/IRS1/TNC/BCL6/SMAD3/TAPBP/CCNG2/RIPK4/TNFRSF10B/INTS6/SLC5A3/FLRT3/TOB1/FNDC3B/RXRA
SMIRNOV_CIRCULATING_ENDOTHELIOCYTES_IN_CANCER_UP	SMIRNOV_CIRCULATING_ENDOTHELIOCYTES_IN_CANCER_UP	139	0.516575	2.08695	6.07761e-08	tags=17%, list=7%, signal=16%	EGR1/IER3/CXCL8/BHLHE40/SLCO4A1/HBEGF/ADM/MAFG/SMAD7/CHKA/SCML1/PFKFB3/SKIL/MARCO/SLC23A2/RGS3/MAPK7/MARCKSL1/HNMT/GLUL/SGSH/GAB2/PDLIM7/CYP1A1
CHUANG_OXIDATIVE_STRESS_RESPONSE_UP	CHUANG_OXIDATIVE_STRESS_RESPONSE_UP	28	0.691451	2.08447	6.36669e-05	tags=46%, list=14%, signal=40%	EGR1/JUN/GDF15/DDIT3/EDN1/MT1H/MT1X/ZBTB4/RCBTB1/FAS/DKK1/HMOX1/PSMD3
WP_IL3_SIGNALING_PATHWAY	WP_IL3_SIGNALING_PATHWAY	47	0.619139	2.08213	7.6697e-06	tags=34%, list=12%, signal=30%	FOS/JUN/CXCL8/SOS1/SRC/CBL/PIK3R1/BCL2/GAB2/STAT5B/BCL2L1/PIK3CD/GRB2/IL3/STAT5A/AKT1
PID_CD8_TCR_DOWNSTREAM_PATHWAY	PID_CD8_TCR_DOWNSTREAM_PATHWAY	62	0.594698	2.08082	2.90672e-06	tags=15%, list=4%, signal=14%	EGR1/FOS/TNF/JUN/JUNB/MAP2K2/NFATC3/FOSL1/HLA-A
PID_IL6_7_PATHWAY	PID_IL6_7_PATHWAY	45	0.620078	2.08072	1.54659e-05	tags=36%, list=10%, signal=32%	FOS/JUN/JUNB/IL6/SOS1/SOCS3/PTPRE/PIK3R1/MYC/PIAS1/GAB2/LMO4/GAB1/BCL2L1/GRB2/FGG
XU_HGF_SIGNALING_NOT_VIA_AKT1_6HR	XU_HGF_SIGNALING_NOT_VIA_AKT1_6HR	24	0.71435	2.08072	0.000105248	tags=25%, list=3%, signal=24%	JUN/HBEGF/NAV3/LSS/PFKFB3/SMTN
BIOCARTA_IGF1_PATHWAY	BIOCARTA_IGF1_PATHWAY	19	0.755032	2.07021	1.13757e-05	tags=47%, list=13%, signal=41%	FOS/JUN/SOS1/PIK3R1/IRS1/GRB2/IGF1R/RASA1/CSNK2A1
WP_PDGF_PATHWAY	WP_PDGF_PATHWAY	36	0.642172	2.06902	6.42764e-05	tags=22%, list=5%, signal=21%	FOS/JUN/NFKBIA/SOS1/SRC/VAV2/PIK3R1/PLA2G4A
PID_AVB3_OPN_PATHWAY	PID_AVB3_OPN_PATHWAY	30	0.671588	2.06828	5.73389e-05	tags=23%, list=4%, signal=22%	FOS/JUN/NFKBIA/PIP5K1A/VAV3/PTK2B/PIK3R1
HARRIS_HYPOXIA	HARRIS_HYPOXIA	79	0.561397	2.06745	2.28124e-06	tags=13%, list=2%, signal=12%	FOS/JUN/CXCL8/BHLHE40/IL6/ADM/DDIT3/L1CAM/EDN1/PKM
SA_B_CELL_RECEPTOR_COMPLEXES	SA_B_CELL_RECEPTOR_COMPLEXES	24	0.709289	2.06598	0.000126887	tags=25%, list=3%, signal=24%	FOS/JUN/VAV3/SOS1/VAV2/MAPK8IP3
WP_EBV_LMP1_SIGNALING	WP_EBV_LMP1_SIGNALING	22	0.725877	2.06261	5.09428e-05	tags=36%, list=7%, signal=34%	TNF/CXCL8/NFKBIA/NFKB2/MAP3K3/HSP90AA1/TRADD/PDLIM7
BIOCARTA_IL6_PATHWAY	BIOCARTA_IL6_PATHWAY	20	0.742001	2.06117	7.44877e-05	tags=20%, list=2%, signal=20%	FOS/JUN/IL6/SOS1
GROSS_HYPOXIA_VIA_ELK3_AND_HIF1A_UP	GROSS_HYPOXIA_VIA_ELK3_AND_HIF1A_UP	140	0.50829	2.05671	8.36969e-08	tags=22%, list=7%, signal=21%	EGR1/FOS/CXCL2/ATF3/HBEGF/CSRNP1/SPRY4/CCN1/ZFP36/SPRY2/NFKBIA/PHLDA1/MAGED1/EDN1/JMJD6/PFKFB3/KLF6/PLK2/SDC4/TGIF1/ERRFI1/SMOX/LRP5/ENO2/VWA1/TNC/PNRC1/DUSP14/PIM3/SLC19A1/AK4
HUNSBERGER_EXERCISE_REGULATED_GENES	HUNSBERGER_EXERCISE_REGULATED_GENES	31	0.661552	2.05476	2.67023e-05	tags=26%, list=6%, signal=24%	EGR1/DUSP6/ADGRL1/MAP2K2/MAGED1/GIT1/CADM1/SYN1
WP_ONCOSTATIN_M_SIGNALING_PATHWAY	WP_ONCOSTATIN_M_SIGNALING_PATHWAY	62	0.58593	2.05014	5.4465e-06	tags=24%, list=7%, signal=23%	EGR1/FOS/JUNB/CCN1/NFKBIA/MAP2K2/SERPINE1/SOS1/SRC/SOCS3/PTK2B/PIK3R1/IRS1/STAT5B/PRKCH
BHAT_ESR1_TARGETS_VIA_AKT1_UP	BHAT_ESR1_TARGETS_VIA_AKT1_UP	268	0.473076	2.04949	1e-10	tags=25%, list=11%, signal=23%	FOS/IER3/BHLHE40/ATF3/GDF15/SIN3B/LETM1/PPIF/SH2B2/UBALD1/JADE2/SLC25A25/CBFA2T3/ACIN1/GATAD2A/CLUH/FAM102A/SLC29A1/FLNB/TMEM104/NCOR2/SVIL/KDM4B/TRIM47/SRM/B4GALT1/ZNF703/RECQL4/TBX2/SHB/IGFBP4/POP1/SYT12/UHRF1/TIPARP/PAK4/TMEM51/IER5L/SBNO2/CYP26A1/PA2G4/GAB2/PRR5/LONRF2/PIP4K2A/RAPGEFL1/MAG/HLA-DRB1/SCARB1/KHK/CYP4F11/LMO1/C1orf159/TWNK/AKNA/TGM2/CALM1/DHRS2/TFF2/PRKAG2/FHL2/ARMC6/CDC34/SLC22A…
DELACROIX_RAR_TARGETS_UP	DELACROIX_RAR_TARGETS_UP	44	0.615869	2.04811	3.57594e-05	tags=16%, list=3%, signal=16%	DUSP1/JUNB/BHLHE40/DUSP6/HMGA1/CHKA/SKIL
PID_PI3K_PLC_TRK_PATHWAY	PID_PI3K_PLC_TRK_PATHWAY	36	0.635576	2.04777	8.90343e-05	tags=39%, list=13%, signal=34%	EGR1/YWHAE/SOS1/SFN/SRC/PIK3R1/CAMK4/GAB1/GRB2/NGF/STAT5A/AKT1/GSK3B/NTRK1
DORN_ADENOVIRUS_INFECTION_48HR_DN	DORN_ADENOVIRUS_INFECTION_48HR_DN	39	0.628553	2.04597	9.23735e-05	tags=36%, list=14%, signal=31%	IER3/JUNB/IL6/CCN1/NFKBIA/EPHA2/PLK2/CYTH1/SRSF1/FHL2/EFNA1/CCNK/MCL1/MAP2K3
BIOCARTA_INSULIN_PATHWAY	BIOCARTA_INSULIN_PATHWAY	19	0.744873	2.04236	1.85991e-05	tags=42%, list=13%, signal=37%	FOS/JUN/SOS1/PIK3R1/IRS1/GRB2/RASA1/CSNK2A1
ZHENG_RESPONSE_TO_ARSENITE_UP	ZHENG_RESPONSE_TO_ARSENITE_UP	14	0.800052	2.03484	6.8503e-05	tags=79%, list=15%, signal=67%	MT2A/GCLM/DNAJB1/MT1H/MT1X/FOSL1/MT1E/BCL2/HMOX1/MT1M/MT1G
LEONARD_HYPOXIA	LEONARD_HYPOXIA	41	0.612818	2.03167	0.000238603	tags=24%, list=8%, signal=22%	DUSP1/JUNB/BHLHE40/SERPINE1/JMJD6/HOXA4/NFIL3/AK4/CCNG2/DDIT4
BERENJENO_TRANSFORMED_BY_RHOA_FOREVER_DN	BERENJENO_TRANSFORMED_BY_RHOA_FOREVER_DN	27	0.678104	2.03005	0.000218302	tags=22%, list=1%, signal=22%	CXCL2/IER3/HBEGF/PHLDA1/EPHA2/FLNB
WP_COVID19_ADVERSE_OUTCOME_PATHWAY	WP_COVID19_ADVERSE_OUTCOME_PATHWAY	15	0.78428	2.02947	8.32508e-05	tags=27%, list=2%, signal=26%	TNF/CXCL8/IL6/IL1B
AMIT_EGF_RESPONSE_60_HELA	AMIT_EGF_RESPONSE_60_HELA	42	0.613358	2.02572	0.000103605	tags=21%, list=5%, signal=20%	BHLHE40/HES1/FOSB/CCN1/KLF10/SERPINE1/PKM/KLF6/TIPARP
TOMIDA_METASTASIS_UP	TOMIDA_METASTASIS_UP	26	0.682865	2.02469	9.88298e-05	tags=35%, list=10%, signal=31%	IER3/CXCL1/GNAI2/UBA1/HNRNPUL1/TUBB/HSP90AB1/CKAP4/TUBA3D
REACTOME_SIGNALING_BY_NTRKS	REACTOME_SIGNALING_BY_NTRKS	131	0.508124	2.02465	3.86977e-07	tags=37%, list=19%, signal=31%	EGR1/FOS/JUNB/DUSP6/FOSB/BAX/FURIN/ADORA2A/MAP2K2/CDK5R2/SOS1/SRC/NELFB/FOSL1/REST/NAB2/PPP2R5D/ID1/PIK3R1/MAPK7/MAP2K5/DNM2/EP300/IRS1/AP2A1/AP2A2/MEF2A/KIDINS220/RIT1/GAB1/GRB2/NGF/PPP2CA/AP2M1/PPP2R1A/RPS6KA2/DUSP7/NTRK1/ADCYAP1/AP2S1/CRKL/RPS6KA3/TRIB1/MAPK14/NTRK3/NTF4/SH3GL3/EGR2/ATF1
JINESH_BLEBBISHIELD_TRANSFORMED_STEM_CELL_SPHERES_DN	JINESH_BLEBBISHIELD_TRANSFORMED_STEM_CELL_SPHERES_DN	278	0.467562	2.02433	1e-10	tags=26%, list=14%, signal=23%	EGR1/FOS/DUSP1/CXCL8/JUNB/BHLHE40/ATF3/CSRNP1/ZNF114/FOSB/ADM/PPP1R15A/DDIT3/CCN1/SNRNP70/SULT1A2/CHKA/SOX9/MIB2/WFIKKN1/PIK3C2A/RECQL4/CCDC125/TACC3/MAPK8IP3/ID1/SNHG7/CBX4/PIDD1/KREMEN2/GPT2/CUL9/HNMT/C2orf88/GLUL/SREBF1/TRIM13/DPP7/SESN2/CHTF18/NAP1L4/DMC1/CHST3/EIF5/LRRC37B/CLASRP/RHOT2/DDIT4/LILRB1/PIP4K2B/SLC4A5/UPF2/DDX51/H2BC3/NOP56/TDG/NPIPB13/ZNF394/RNF213/BRICD5/STK40/ST3GAL5/TSC22D3/T…
WP_IL2_SIGNALING_PATHWAY	WP_IL2_SIGNALING_PATHWAY	41	0.609463	2.02055	0.000253633	tags=39%, list=12%, signal=34%	FOS/JUN/MAP2K2/SOS1/SOCS3/CBL/PTK2B/LCK/PIK3R1/MYC/BCL2/GAB2/STAT5B/GRB2/STAT5A/AKT1
BIOCARTA_TPO_PATHWAY	BIOCARTA_TPO_PATHWAY	22	0.709855	2.01708	0.00011604	tags=45%, list=15%, signal=39%	FOS/JUN/SOS1/PIK3R1/STAT5B/GRB2/STAT5A/RASA1/CSNK2A1/PRKCB
BIOCARTA_MET_PATHWAY	BIOCARTA_MET_PATHWAY	32	0.640694	2.0154	0.00018595	tags=28%, list=9%, signal=26%	FOS/JUN/MAP2K2/ACTA1/SOS1/PTK2B/PIK3R1/GAB1/GRB2
RODRIGUES_NTN1_AND_DCC_TARGETS	RODRIGUES_NTN1_AND_DCC_TARGETS	32	0.640694	2.0154	0.00018595	tags=38%, list=12%, signal=33%	FOS/KLF10/MT2A/PKM/MT1X/MT1E/KMT2E/PPARA/KIF13B/BCL3/MT1F/NF1
PID_HIF1_TFPATHWAY	PID_HIF1_TFPATHWAY	65	0.570158	2.01355	1.51619e-05	tags=38%, list=16%, signal=32%	FOS/JUN/BHLHE40/ADM/HDAC7/FURIN/SERPINE1/EDN1/PKM/NCOA1/PFKFB3/EP300/SMAD3/TERT/ENG/NPM1/AKT1/PFKL/HK2/HMOX1/MCL1/HK1/ARNT/TFF3/LDHA
JOHNSTONE_PARVB_TARGETS_2_UP	JOHNSTONE_PARVB_TARGETS_2_UP	132	0.504228	2.0135	7.88429e-07	tags=30%, list=11%, signal=27%	SLC4A2/OGDH/KCTD13/PKN1/YWHAE/BSG/EPHX1/FURIN/ARHGDIA/LY6E/SERPINE1/GRINA/GNAI2/PKM/MDK/ZYX/SLC25A1/DLGAP4/UAP1L1/FKBP1A/G6PD/IGFBP4/CLPTM1/HLA-A/CLPTM1L/SMAD3/SBNO2/NECTIN2/CORO1B/DMPK/HLA-DRB1/BCL2L1/MINK1/STXBP2/SPTAN1/DNAJC4/WBP2/TFE3/H1-0/HLA-B
DAZARD_RESPONSE_TO_UV_NHEK_UP	DAZARD_RESPONSE_TO_UV_NHEK_UP	209	0.474564	2.01275	1.8929e-08	tags=23%, list=13%, signal=20%	FOS/DUSP1/CXCL2/IER3/JUN/CXCL8/JUNB/ATF3/IL6/HBEGF/ADM/PPP1R15A/IER2/CCN1/PPIF/ZFP36/PHLDA1/CXCL1/ARHGDIA/LY6E/GPAA1/GEM/PKM/SCG5/PAX8/CSRP1/UBE2S/GPS2/BCL2/HSP90AB1/H2AC16/PFN1/GADD45A/H2AX/TRIM15/STXBP2/TUBB4B/TOB1/TUBB4A/TFE3/PLXNA3/CAPNS1/PPP2R1A/NCBP2/PIK3R3/TYMP/RALY/INSL4
ELVIDGE_HIF1A_TARGETS_UP	ELVIDGE_HIF1A_TARGETS_UP	59	0.57388	2.01242	1.82998e-05	tags=36%, list=14%, signal=31%	SLCO3A1/GPATCH2/GDPD3/CTPS1/TOR3A/CHKA/SLC29A1/SRM/KPNA1/SPAG1/DNAJA1/AMD1/CORO1A/SLC35C1/GCH1/RFK/SLC5A6/PSEN2/CCDC86/RMC1/GABBR2
TURJANSKI_MAPK1_AND_MAPK2_TARGETS	TURJANSKI_MAPK1_AND_MAPK2_TARGETS	11	0.84728	2.011	2.95946e-05	tags=36%, list=5%, signal=34%	FOS/ELK4/MYC/SMAD3
REACTOME_FCERI_MEDIATED_MAPK_ACTIVATION	REACTOME_FCERI_MEDIATED_MAPK_ACTIVATION	32	0.639072	2.0103	0.000199458	tags=19%, list=2%, signal=18%	FOS/JUN/VAV3/SOS1/VAV2/MAP2K7
WP_LUNG_FIBROSIS	WP_LUNG_FIBROSIS	59	0.573138	2.00982	1.85216e-05	tags=15%, list=3%, signal=15%	CXCL2/TNF/CXCL8/IL6/SMAD7/MT2A/EDN1/IL1B/SKIL
REACTOME_INTERLEUKIN_10_SIGNALING	REACTOME_INTERLEUKIN_10_SIGNALING	45	0.5984	2.00797	6.06251e-05	tags=18%, list=6%, signal=17%	CXCL2/TNF/CXCL8/IL6/CXCL1/IL1B/CSF1/CCL4
BIOCARTA_EPO_PATHWAY	BIOCARTA_EPO_PATHWAY	19	0.729151	1.99925	4.0239e-05	tags=42%, list=13%, signal=37%	FOS/JUN/SOS1/STAT5B/GRB2/STAT5A/CSNK2A1/EPOR
ELVIDGE_HYPOXIA_UP	ELVIDGE_HYPOXIA_UP	160	0.485647	1.99795	2.54846e-07	tags=20%, list=8%, signal=19%	EGR1/FOS/DUSP1/JUN/BHLHE40/ATF3/GDF15/SLCO4A1/ADM/CCN1/SPRY1/ANKZF1/SOX9/SERPINE1/FLNB/KDM4B/SAMD4A/PFKFB3/RBCK1/CADM1/KLF6/NFIL3/YEATS2/ENO2/TIPARP/AK4/RLF/TNFAIP8/HLA-DRB1/SCARB1/CCNG2/DDIT4
RASHI_RESPONSE_TO_IONIZING_RADIATION_2	RASHI_RESPONSE_TO_IONIZING_RADIATION_2	120	0.50722	1.99528	1.7156e-06	tags=28%, list=13%, signal=24%	CXCL2/JUNB/DUSP6/ATF3/NFKBIA/TAGLN2/BAX/APAF1/KLF10/RNF19B/NFKB2/EDN1/DENND2B/VPS37B/BTG2/CSF1/IRF6/KLF6/PLK2/TGIF1/SPOP/RELL1/RHOU/NFE2L1/TRAF3/GAB1/WWTR1/NGF/NFKBIB/SLC7A7/HIPK2/RLIM/INPP5A
BIOCARTA_IL2RB_PATHWAY	BIOCARTA_IL2RB_PATHWAY	34	0.62453	1.99364	0.000164754	tags=38%, list=12%, signal=34%	FOS/SOS1/SOCS3/CBL/PIK3R1/MYC/IRS1/BCL2/STAT5B/GRB2/FAS/STAT5A/AKT1
BIOCARTA_PPARA_PATHWAY	BIOCARTA_PPARA_PATHWAY	51	0.584929	1.99349	4.85929e-05	tags=37%, list=15%, signal=32%	DUSP1/TNF/JUN/NFKBIA/NCOR2/NCOA1/PIK3R1/MYC/EP300/PPARA/HSP90AA1/STAT5B/ACOX1/STAT5A/RXRA/PRKAR1B/NCOR1/PRKACG/PRKCB
DORN_ADENOVIRUS_INFECTION_24HR_DN	DORN_ADENOVIRUS_INFECTION_24HR_DN	42	0.603216	1.99222	0.000164436	tags=40%, list=16%, signal=34%	IER3/JUNB/IL6/CCN1/NFKBIA/EPHA2/NFKB2/PLK2/CYTH1/SRSF1/FHL2/EFNA1/H1-0/MCL1/MAP2K3/SH3BP5/MFAP2
REACTOME_TGF_BETA_RECEPTOR_SIGNALING_ACTIVATES_SMADS	REACTOME_TGF_BETA_RECEPTOR_SIGNALING_ACTIVATES_SMADS	31	0.64136	1.99204	7.10739e-05	tags=32%, list=8%, signal=30%	PPP1R15A/SMAD7/FURIN/CBL/FKBP1A/PMEPA1/PPP1CA/SMAD3/STUB1/XPO1
WP_OVERVIEW_OF_NANOPARTICLE_EFFECTS	WP_OVERVIEW_OF_NANOPARTICLE_EFFECTS	18	0.73831	1.99112	0.000287605	tags=39%, list=9%, signal=36%	TNF/CXCL8/IL6/BAX/NFRKB/BCL2/PIK3CD
WP_TCELL_ANTIGEN_RECEPTOR_TCR_PATHWAY_DURING_STAPHYLOCOCCUS_AUREUS_INFECTION	WP_TCELL_ANTIGEN_RECEPTOR_TCR_PATHWAY_DURING_STAPHYLOCOCCUS_AUREUS_INFECTION	59	0.566706	1.98727	2.60807e-05	tags=15%, list=3%, signal=15%	FOS/TNF/JUN/NFKBIA/MAP2K2/SOS1/MAP2K7/CBL/LCK
KEGG_NOD_LIKE_RECEPTOR_SIGNALING_PATHWAY	KEGG_NOD_LIKE_RECEPTOR_SIGNALING_PATHWAY	55	0.574311	1.9821	4.2706e-05	tags=22%, list=7%, signal=20%	CXCL2/TNF/CXCL8/IL6/NFKBIA/CXCL1/IL1B/NLRP1/TRIP6/HSP90AA1/HSP90AB1/TAB1
BIOCARTA_CYTOKINE_PATHWAY	BIOCARTA_CYTOKINE_PATHWAY	18	0.734602	1.98112	0.000326735	tags=17%, list=0%, signal=17%	TNF/CXCL8/IL6
LIN_APC_TARGETS	LIN_APC_TARGETS	68	0.554996	1.98048	2.56806e-05	tags=38%, list=17%, signal=32%	AGRN/SH2B2/L1CAM/ARHGDIA/LY6E/FBRS/MMP14/MTA1/SCN5A/UBA1/HNRNPUL1/TLE5/PFN1/ADRA2C/TGM2/PRKCSH/GIPC1/RAB1B/PCDH9/GET4/CYB5R3/POLR2A/SORBS3/MAP3K11/SLC35B2/BCAP31
PID_FGF_PATHWAY	PID_FGF_PATHWAY	53	0.576966	1.98045	0.000126402	tags=28%, list=12%, signal=25%	FOS/JUN/SPRY2/SOS1/SRC/CBL/PTK2B/CTTN/PIK3R1/PAK4/STAT5B/GAB1/GRB2/FGF6/AKT1
PID_FCER1_PATHWAY	PID_FCER1_PATHWAY	56	0.571806	1.98023	6.86369e-05	tags=21%, list=9%, signal=20%	FOS/DUSP1/JUN/MAP2K2/SOS1/MAP2K7/CBL/PIK3R1/PLA2G4A/GAB2/S1PR1/GRB2
WP_KIT_RECEPTOR_SIGNALING_PATHWAY	WP_KIT_RECEPTOR_SIGNALING_PATHWAY	59	0.564623	1.97996	2.83098e-05	tags=36%, list=15%, signal=30%	FOS/JUNB/SH2B2/GRB7/MAP2K2/SOS1/SRC/TBX2/CBL/MATK/PIK3R1/EP300/BCL2/GAB2/STAT5B/GRB2/STAT5A/AKT1/CRKL/PRKCB/RPS6KA3
PID_LYSOPHOSPHOLIPID_PATHWAY	PID_LYSOPHOSPHOLIPID_PATHWAY	64	0.559016	1.97521	1.54657e-05	tags=30%, list=13%, signal=26%	FOS/JUN/CXCL8/IL6/HBEGF/NFKBIA/ARHGEF1/GNAI2/SRC/PTK2B/PIK3R1/TRIP6/ADCY6/GAB1/GNAO1/ADCY9/GNG2/AKT1/GSK3B
INGA_TP53_TARGETS	INGA_TP53_TARGETS	16	0.755393	1.97451	0.000171535	tags=38%, list=8%, signal=35%	FOS/IER3/BAX/SFN/GADD45A/TNFRSF10B
SCHOEN_NFKB_SIGNALING	SCHOEN_NFKB_SIGNALING	33	0.622204	1.97326	0.000198442	tags=24%, list=2%, signal=24%	CXCL2/CXCL8/CSRNP1/CCN1/NUAK2/NFKBIA/EDN1/IL1B
BIOCARTA_IL2_PATHWAY	BIOCARTA_IL2_PATHWAY	21	0.702107	1.97123	0.000440286	tags=38%, list=13%, signal=33%	FOS/JUN/SOS1/LCK/STAT5B/GRB2/STAT5A/CSNK2A1
THEILGAARD_NEUTROPHIL_AT_SKIN_WOUND_UP	THEILGAARD_NEUTROPHIL_AT_SKIN_WOUND_UP	70	0.548811	1.97038	2.68261e-05	tags=30%, list=12%, signal=27%	CXCL2/TNF/IER3/CXCL8/SH2B2/ZFP36/HMGA1/KLF10/PHF1/NCOR2/IL1B/SKIL/PTPRE/ATP1A1/EIF5/TRAF3/RPS16/GABARAPL2/SRP54/PPP2R2A/GPR18
ELVIDGE_HYPOXIA_BY_DMOG_UP	ELVIDGE_HYPOXIA_BY_DMOG_UP	125	0.498589	1.96964	2.22922e-06	tags=28%, list=14%, signal=24%	EGR1/FOS/JUN/BHLHE40/ATF3/GDF15/SLCO4A1/ADM/SPRY1/SOX9/SERPINE1/SAMD4A/PFKFB3/RBCK1/CADM1/KLF6/NFIL3/YEATS2/ENO2/AK4/RLF/TNFAIP8/HLA-DRB1/CCNG2/DDIT4/ATXN1/PPFIA4/ILVBL/INSIG2/ARTN/ATG14/OBSL1/HK2/PIM1/DSC2
DASU_IL6_SIGNALING_SCAR_UP	DASU_IL6_SIGNALING_SCAR_UP	29	0.649028	1.9693	0.000509061	tags=31%, list=6%, signal=29%	AGRN/ZFP36/TPX2/PLEC/UBE2S/IRS1/TNC/CIC/SREBF1
SARTIPY_NORMAL_AT_INSULIN_RESISTANCE_UP	SARTIPY_NORMAL_AT_INSULIN_RESISTANCE_UP	27	0.657636	1.96878	0.000502003	tags=48%, list=15%, signal=41%	BHLHE40/DUSP6/IER2/PHLDA1/SRXN1/SPSB1/FOSL1/AK4/NOP56/PTGES/NOP58/HMOX1/SPRED2
REACTOME_METALLOTHIONEINS_BIND_METALS	REACTOME_METALLOTHIONEINS_BIND_METALS	11	0.829453	1.96869	8.54728e-05	tags=82%, list=15%, signal=69%	MT2A/MT1A/MT1H/MT1X/MT1E/MT3/MT1F/MT1M/MT1G
BIOCARTA_GRANULOCYTES_PATHWAY	BIOCARTA_GRANULOCYTES_PATHWAY	13	0.787746	1.96662	0.000398542	tags=15%, list=0%, signal=15%	TNF/CXCL8
RASHI_NFKB1_TARGETS	RASHI_NFKB1_TARGETS	17	0.741084	1.96511	0.000323939	tags=35%, list=3%, signal=34%	CXCL2/DUSP6/NFKBIA/NFKB2/BTG2/CSF1
BIOCARTA_IL3_PATHWAY	BIOCARTA_IL3_PATHWAY	15	0.759213	1.96461	0.000308767	tags=40%, list=10%, signal=36%	FOS/SOS1/STAT5B/GRB2/IL3/STAT5A
DORN_ADENOVIRUS_INFECTION_32HR_DN	DORN_ADENOVIRUS_INFECTION_32HR_DN	38	0.604978	1.96389	0.000199919	tags=34%, list=14%, signal=29%	IER3/JUNB/CCN1/NFKBIA/EPHA2/NFKB2/PLK2/CYTH1/SRSF1/FHL2/EFNA1/MCL1/MAP2K3
PID_IL23_PATHWAY	PID_IL23_PATHWAY	34	0.614778	1.96251	0.000307898	tags=21%, list=4%, signal=20%	TNF/IL6/NFKBIA/CXCL1/SOCS3/IL1B/PIK3R1
WP_SPINAL_CORD_INJURY	WP_SPINAL_CORD_INJURY	114	0.501655	1.9601	5.20925e-06	tags=16%, list=8%, signal=15%	EGR1/FOS/CXCL2/TNF/CXCL8/IL6/ZFP36/CXCL1/SOX9/IL1B/FKBP1A/BTG2/GDNF/MYC/RTN4/MAG/LTB/GADD45A
LINDSTEDT_DENDRITIC_CELL_MATURATION_A	LINDSTEDT_DENDRITIC_CELL_MATURATION_A	57	0.563761	1.95964	6.93216e-05	tags=19%, list=6%, signal=18%	CXCL2/TNF/CXCL8/IL6/CXCL1/TNFSF9/EDN1/IL1B/PLA2G4A/TNC/CCL4
DAZARD_UV_RESPONSE_CLUSTER_G28	DAZARD_UV_RESPONSE_CLUSTER_G28	18	0.726637	1.95964	0.000499406	tags=22%, list=0%, signal=22%	CXCL2/IER3/CXCL8/ATF3
HEDVAT_ELF4_TARGETS_UP	HEDVAT_ELF4_TARGETS_UP	12	0.805214	1.95798	0.00017563	tags=17%, list=0%, signal=17%	CXCL2/CXCL8
ELVIDGE_HYPOXIA_BY_DMOG_DN	ELVIDGE_HYPOXIA_BY_DMOG_DN	55	0.56665	1.95566	7.02278e-05	tags=35%, list=14%, signal=30%	SLCO3A1/GPATCH2/GDPD3/CTPS1/TOR3A/SLC29A1/SRM/SPAG1/CORO1A/ATP2A3/ALDH4A1/SRSF1/CALM1/PUS1/SLC35C1/ADORA1/SLC5A6/PIK3R3/GABBR2
BERENJENO_TRANSFORMED_BY_RHOA_REVERSIBLY_DN	BERENJENO_TRANSFORMED_BY_RHOA_REVERSIBLY_DN	28	0.648571	1.9552	0.000331792	tags=32%, list=7%, signal=30%	DUSP6/ADM/CCN1/SERPINE1/ACTA1/MYC/ERRFI1/TNC/AK4
WP_TGFBETA_SIGNALING_PATHWAY	WP_TGFBETA_SIGNALING_PATHWAY	128	0.493983	1.95486	2.41095e-06	tags=21%, list=8%, signal=20%	FOS/JUN/JUNB/ATF3/FOSB/KLF10/SMAD7/MAP2K2/SIK1/SOS1/SRC/DCP1A/SKIL/KLF6/TGIF1/PIK3R1/MYC/EP300/PIAS1/TNC/NUP153/KLF11/SMAD3/MEF2A/TAB1/RNF111/TERT
KEGG_TOLL_LIKE_RECEPTOR_SIGNALING_PATHWAY	KEGG_TOLL_LIKE_RECEPTOR_SIGNALING_PATHWAY	91	0.514987	1.95371	1.33023e-05	tags=19%, list=9%, signal=17%	FOS/TNF/JUN/CXCL8/IL6/NFKBIA/MAP2K2/IL1B/MAP2K7/PIK3R1/TOLLIP/CCL4/CTSK/TAB1/TRAF3/PIK3CD/IFNAR2
BIOCARTA_KERATINOCYTE_PATHWAY	BIOCARTA_KERATINOCYTE_PATHWAY	44	0.587419	1.9535	0.000203045	tags=34%, list=15%, signal=29%	FOS/TNF/JUN/NFKBIA/MAP2K7/TRAF2/BCL2/PRKCH/FAS/PPP2CA/HOXA7/TNFRSF1A/MAP3K5/MAP2K3/PRKCB
VALK_AML_CLUSTER_10	VALK_AML_CLUSTER_10	30	0.634103	1.95284	0.000290018	tags=30%, list=8%, signal=28%	SPRY1/ADGRL1/RBPMS/FLNB/BCL7A/SMAGP/PRKD2/TPM2/CD22
WP_SIGNALING_OF_HEPATOCYTE_GROWTH_FACTOR_RECEPTOR	WP_SIGNALING_OF_HEPATOCYTE_GROWTH_FACTOR_RECEPTOR	33	0.614624	1.94922	0.000267798	tags=18%, list=3%, signal=18%	FOS/JUN/MAP2K2/SOS1/SRC/PTK2B
RIZ_ERYTHROID_DIFFERENTIATION_12HR	RIZ_ERYTHROID_DIFFERENTIATION_12HR	35	0.605605	1.94781	0.000716362	tags=17%, list=4%, signal=17%	EGR1/FOS/JUN/HOXA4/NAB2/KLF6
PID_IL2_1PATHWAY	PID_IL2_1PATHWAY	54	0.566912	1.94405	0.000124944	tags=30%, list=10%, signal=27%	FOS/JUN/MAP2K2/SOS1/SOCS3/PTK2B/LCK/PPP2R5D/PIK3R1/MYC/IRS1/BCL2/GAB2/STAT5B/GRB2/STAT5A
WANG_METHYLATED_IN_BREAST_CANCER	WANG_METHYLATED_IN_BREAST_CANCER	35	0.604204	1.9433	0.000716362	tags=51%, list=20%, signal=41%	DUSP1/GDF15/HBEGF/EPHA2/ZYX/FOSL1/KLF6/TUBB/GADD45A/TNFRSF10B/MYO1B/KRT17/DKK1/CAV1/CDC25A/SLC9A1/F3/SPHK1
HINATA_NFKB_TARGETS_FIBROBLAST_UP	HINATA_NFKB_TARGETS_FIBROBLAST_UP	78	0.52898	1.9431	2.68439e-05	tags=23%, list=10%, signal=21%	IER3/CXCL8/IL6/NFKBIA/CXCL1/TAF15/ARHGDIA/NFKB2/MMP14/SERPINE1/EDN1/IL1B/ANXA13/TNFAIP8/GADD45A/EXOSC9/MT3/GCH1
BROWNE_HCMV_INFECTION_1HR_UP	BROWNE_HCMV_INFECTION_1HR_UP	51	0.570021	1.94268	0.000118128	tags=18%, list=4%, signal=17%	CXCL2/CXCL8/IL6/CXCL1/MMP14/SIK1/PCDH7/NDST1/MAZ
KEGG_PRION_DISEASES	KEGG_PRION_DISEASES	34	0.608122	1.94127	0.000424237	tags=18%, list=2%, signal=17%	EGR1/IL6/BAX/MAP2K2/STIP1/IL1B
MOREIRA_RESPONSE_TO_TSA_UP	MOREIRA_RESPONSE_TO_TSA_UP	25	0.660066	1.941	0.000722103	tags=32%, list=10%, signal=29%	BHLHE40/USF2/IGFBP4/MYC/ENO2/HSP90AB1/PA2G4/EIF6
SIG_CD40PATHWAYMAP	SIG_CD40PATHWAYMAP	30	0.629363	1.93824	0.000344518	tags=40%, list=10%, signal=36%	DUSP1/NFKBIA/NFKB2/MAP2K7/MAPK8IP3/TRAF2/PIK3R1/TONSL/TRAF3/TRAF5/PIK3CD/NFKBIB
REACTOME_RET_SIGNALING	REACTOME_RET_SIGNALING	39	0.594441	1.93493	0.00049615	tags=44%, list=14%, signal=38%	GRB7/SOS1/SRC/GFRA3/PIK3R1/MAPK7/GDNF/GFRA2/GAB2/PDLIM7/GAB1/PIK3CD/GRB2/DOK4/ARTN/PIK3R3/PRKACG
REACTOME_RESPONSE_TO_METAL_IONS	REACTOME_RESPONSE_TO_METAL_IONS	14	0.760712	1.93478	0.00045215	tags=71%, list=15%, signal=61%	MT2A/MT1A/MT1H/MT1X/MT1E/CSRP1/MT3/MT1F/MT1M/MT1G
WP_TOLLLIKE_RECEPTOR_SIGNALING_PATHWAY	WP_TOLLLIKE_RECEPTOR_SIGNALING_PATHWAY	93	0.51056	1.93465	3.11326e-05	tags=27%, list=16%, signal=23%	FOS/TNF/JUN/CXCL8/IL6/NFKBIA/MAP2K2/IL1B/MAP2K7/PIK3R1/TOLLIP/CCL4/TAB1/TRAF3/PIK3CD/IFNAR2/NFKBIB/CCL5/AKT1/PIK3R3/TLR7/MAP2K3/IFNA21/IRAK1/IRF5
CONCANNON_APOPTOSIS_BY_EPOXOMICIN_UP	CONCANNON_APOPTOSIS_BY_EPOXOMICIN_UP	227	0.451277	1.93448	6.08236e-08	tags=29%, list=16%, signal=24%	FOS/DUSP1/JUN/ATF3/GDF15/PPP1R15A/DDIT3/ZFP36/SLCO3A1/KLHL21/N4BP2L2/GCLM/TNFSF9/STIP1/SERPINE1/DNAJB1/GEM/NACC2/JMJD6/ZYX/SKIL/DYNC1H1/TSPYL2/KLF6/PLK2/DNAJB6/SLC12A4/SMOX/WARS1/RHBDD3/ARHGEF2/SERPINH1/EPCAM/CREB5/KIF1B/EIF5/RIT1/MBOAT7/PRDM2/GADD45A/TNFRSF10B/CAMK2G/TAC1/ATP2B4/WWTR1/PTPRN/FAS/TNPO2/MAP1LC3B/FAT1/UBR4/PXDC1/UBE2H/PLD3/HMOX1/CEP170B/MXD1/NUCB1/PCYT1B/CD44/SLC7A1/ITGA7/SYT2/ADRM1…
WU_HBX_TARGETS_3_DN	WU_HBX_TARGETS_3_DN	10	0.835428	1.92701	0.00015825	tags=40%, list=5%, signal=38%	IL6/MAP2K2/GSTM4/GAS6
WP_IL18_SIGNALING_PATHWAY	WP_IL18_SIGNALING_PATHWAY	252	0.446308	1.92667	2.75499e-08	tags=26%, list=15%, signal=23%	FOS/CXCL2/TNF/IER3/JUN/CXCL8/ATF3/IL6/NFKBIA/PPP1R13L/BAX/PKN1/BSG/PRCC/PTMS/NFKB2/CDK5R2/MMP14/ITM2C/ACTA1/COL3A1/SOCS3/CCDC9/IL1B/ARFGAP1/MAP2K7/GRM7/LCK/ZBTB7A/BTG2/IRF6/SDC4/PPT2/PIK3R1/ZNF143/BCL2/MEF2A/CCL4/NPPB/LTB/IL9/ZC3H12A/CCN4/BCL2L1/TGM2/FAS/BAZ1B/ZNF444/KLF2/FAM110A/ACACB/CCL5/GPAT4/STK40/TNFRSF1A/GSK3B/KLC1/HMOX1/CETP/BIRC3/TRPC4AP/PTPN7/FN1/CCNA2/PRKCB/SEMA6C
REACTOME_NEGATIVE_REGULATION_OF_MAPK_PATHWAY	REACTOME_NEGATIVE_REGULATION_OF_MAPK_PATHWAY	42	0.583163	1.926	0.000426203	tags=31%, list=15%, signal=27%	DUSP1/DUSP6/DUSP5/MAP2K2/DUSP10/PEBP1/PPP2R5D/PTPN3/PPP2CA/DUSP8/PPP2R1A/DUSP7/PTPN7
PLASARI_TGFB1_TARGETS_10HR_UP	PLASARI_TGFB1_TARGETS_10HR_UP	185	0.461449	1.92593	1.0303e-06	tags=21%, list=10%, signal=19%	IER3/JUNB/BHLHE40/DUSP6/IL6/HBEGF/CSRNP1/PPP1R15A/IER2/NUAK2/DUSP5/PPP1R13L/RNF19B/SERPINE1/FLNB/ACTA1/SFN/FOSL1/IP6K1/PTK2B/CRY1/PMEPA1/NFIL3/ADAM12/TNC/OLFM2/RAP1GAP2/ENTPD7/DUSP14/LPIN3/LRP8/TTC9/NPPB/LMO1/NGF/KHDRBS3/GCH1/FSTL3
BASSO_CD40_SIGNALING_UP	BASSO_CD40_SIGNALING_UP	98	0.506509	1.92561	8.82789e-06	tags=24%, list=11%, signal=22%	TNF/IER3/JUNB/NFKBIA/NFKB2/TNFSF9/SIK1/IL1B/PTK2B/PTPRE/ARHGEF2/TMC6/LHFPL2/BCL2/ADAM8/CCL4/TNFAIP8/HLA-DRB1/DDIT4/PTP4A3/PIK3CD/STAT5A/DTX2/RXRA
HOLLEMAN_PREDNISOLONE_RESISTANCE_ALL_UP	HOLLEMAN_PREDNISOLONE_RESISTANCE_ALL_UP	20	0.692955	1.92493	0.000636395	tags=55%, list=15%, signal=47%	PHF2/TAF5/HNRNPUL1/ZNF318/TLE5/HRK/F8A1/HNRNPR/TIMM17A/CRKL/OTUB1
GHANDHI_DIRECT_IRRADIATION_UP	GHANDHI_DIRECT_IRRADIATION_UP	96	0.506452	1.92485	2.67167e-05	tags=23%, list=11%, signal=21%	CXCL2/CXCL8/GDF15/IL6/CXCL1/MT2A/SLC30A1/MT1H/IL1B/MT1X/MT1E/PTPRE/PIDD1/GDNF/CREB5/LRP8/GADD45A/TNFRSF10B/FAS/GCH1/IFNE/GPATCH2L
WP_VITAMIN_D_IN_INFLAMMATORY_DISEASES	WP_VITAMIN_D_IN_INFLAMMATORY_DISEASES	20	0.692905	1.92479	0.000636395	tags=20%, list=0%, signal=20%	DUSP1/TNF/IL6/NFKBIA
WP_IL5_SIGNALING_PATHWAY	WP_IL5_SIGNALING_PATHWAY	39	0.59128	1.92464	0.000565379	tags=31%, list=13%, signal=27%	FOS/JUN/MAP2K2/SOS1/PIK3R1/MYC/BCL2/STAT5B/GRB2/STAT5A/AKT1/GSK3B
SASAKI_TARGETS_OF_TP73_AND_TP63	SASAKI_TARGETS_OF_TP73_AND_TP63	11	0.810372	1.9234	0.00019791	tags=55%, list=2%, signal=53%	CCN1/MT2A/ATM/JAG2/MT1H/MT1X
PID_TELOMERASE_PATHWAY	PID_TELOMERASE_PATHWAY	64	0.54379	1.92141	4.33362e-05	tags=39%, list=16%, signal=33%	FOS/JUN/SIN3B/YWHAE/ATM/TERF2/UBE3A/MYC/RAD1/SMG6/SMAD3/HSP90AA1/ACD/TERT/SAP18/IFNAR2/TERF2IP/DKC1/AKT1/TERF1/NCL/MXD1/HUS1/RAD9A/WT1
BLANCO_MELO_COVID19_SARS_COV_2_INFECTION_A594_ACE2_EXPRESSING_CELLS_RUXOLITINIB_UP	BLANCO_MELO_COVID19_SARS_COV_2_INFECTION_A594_ACE2_EXPRESSING_CELLS_RUXOLITINIB_UP	412	0.425883	1.92091	3.93201e-10	tags=26%, list=17%, signal=22%	EGR1/FOS/CXCL2/TNF/IER3/JUN/CXCL8/ATF3/GDF15/CSRNP1/HES1/FOSB/ADM/MAFG/PPP1R15A/IER2/DDIT3/ZFP36/NFKBIA/KLF10/CXCL1/TBC1D22B/SALL1/NFKB2/SOX9/TTC21A/GEM/DCP1A/ZNF300P1/SKIL/DUSP10/FOSL1/BTG2/CRY1/SPOCK2/KLF6/CCDC73/NPC1L1/NFIL3/KMT2E/AGAP6/ZNF143/TIPARP/KLF11/CRTC2/ADAM8/PROM1/IL20RB/TMCC2/CCNL1/PPP1R10/CREB5/ETV3/PNN/LTB/TNFAIP8/GADD45A/KPNA5/NHLH1/RAB30/ZC3H12A/KCNQ4/DCHS1/ZNF830/ABTB2/BCL3/INT…
PID_RHOA_PATHWAY	PID_RHOA_PATHWAY	43	0.576455	1.91958	0.000425993	tags=23%, list=7%, signal=22%	FOS/JUN/CCN1/PKN1/PIP5K1A/ACTA1/LIMK1/MSN/PIP5K1C/PIP5K1B
PID_MAPK_TRK_PATHWAY	PID_MAPK_TRK_PATHWAY	32	0.61005	1.91901	0.000618837	tags=16%, list=7%, signal=15%	EGR1/FOS/MAPK7/MAP2K5/RIT1
BILBAN_B_CLL_LPL_DN	BILBAN_B_CLL_LPL_DN	40	0.583214	1.91842	0.000622021	tags=20%, list=4%, signal=19%	FOS/DUSP1/IER3/JUNB/SULT1A2/ARHGEF6/GOLGA8IP/MSL1
BIOCARTA_CD40_PATHWAY	BIOCARTA_CD40_PATHWAY	13	0.768223	1.91788	0.000816882	tags=23%, list=8%, signal=21%	DUSP1/NFKBIA/TRAF3
WP_NUCLEAR_RECEPTORS_METAPATHWAY	WP_NUCLEAR_RECEPTORS_METAPATHWAY	294	0.439253	1.91718	1.29291e-08	tags=24%, list=15%, signal=21%	EGR1/TNF/JUN/JUNB/BHLHE40/HBEGF/HES1/NAV3/MAFG/GSTM1/SPRY1/SOD3/BAX/EPHA2/AKAP13/GCLM/SRXN1/NFKB2/DNAJB1/ABCC5/SRC/DNAJC7/IL1B/NCOA1/PLTP/G6PD/SMC1A/GSTM4/PLK2/MYC/ADH7/GGTLC2/EP300/PPARA/HSP90AA1/HSP90AB1/SREBF1/KEAP1/GGT1/SLC5A10/UGT1A4/CYP1A1/SLC6A8/GSTM2/SERTAD2/SLC5A3/GSTA3/ACOX1/SEC14L1/CES5A/RXRA/ETNK2/SLC5A6/KLK15/TSC22D3/EPB41L4B/SLC39A7/NCOA6/FASN/PDGFB/SLC39A5/ARL5B/HMOX1/BIRC3/NR1I3/C…
WP_ENERGY_METABOLISM	WP_ENERGY_METABOLISM	45	0.570737	1.91515	0.000252379	tags=44%, list=18%, signal=36%	UCP3/UCP2/NCOA1/NRF1/EP300/PPARA/MEF2A/CAMK4/CAMK2G/PRMT1/PRKAG2/RXRA/PPP3R1/MYBBP1A/GSK3B/PRKAG1/ESRRA/MAPK14/PPARD/PPRC1
PID_TCR_CALCIUM_PATHWAY	PID_TCR_CALCIUM_PATHWAY	28	0.634936	1.91409	0.000540593	tags=36%, list=12%, signal=31%	FOS/JUN/JUNB/NFATC3/FOSL1/FKBP1A/POU2F1/IL3/AKAP5/PPP3R1
JACKSON_DNMT1_TARGETS_UP	JACKSON_DNMT1_TARGETS_UP	77	0.520063	1.91369	4.54224e-05	tags=29%, list=15%, signal=24%	CXCL2/JUNB/TRIM28/CCN1/ZFP36/HMGA1/PHLDA1/EPHA2/SOCS3/CSF1/HLA-A/ZFP64/ETV4/TRAF3/CCNG2/ENG/TDG/HLA-B/POLR2A/MAP2K3/IFIT3/AHCY
WP_HOSTPATHOGEN_INTERACTION_OF_HUMAN_CORONA_VIRUSES_MAPK_SIGNALING	WP_HOSTPATHOGEN_INTERACTION_OF_HUMAN_CORONA_VIRUSES_MAPK_SIGNALING	35	0.594823	1.91313	0.00100397	tags=23%, list=5%, signal=22%	FOS/JUN/JUNB/DDIT3/MAP2K2/MAP2K7/MAP3K4/BCL2
BROWNE_HCMV_INFECTION_24HR_UP	BROWNE_HCMV_INFECTION_24HR_UP	142	0.471833	1.91249	3.60658e-06	tags=39%, list=19%, signal=32%	CXCL2/CXCL8/BHLHE40/ADGRL1/NFKBIA/KMT2B/SF1/CHKA/UCP2/SLC29A1/KHDC4/MED22/FKBP1A/TACR3/SNRPB/BAZ1A/CLPTM1/CSPG5/TESK1/TAF5L/FZD5/KEAP1/EPCAM/MCM5/EPHB2/LRP8/STAT5B/CTDP1/AK4/POU2F1/TSFM/CAMK2G/GLS2/FOXA1/DTNB/GRPEL1/NFATC2IP/GPR18/PPP3R1/TERF1/HLTF/GYG2/BRMS1/PDIA4/PSMD3/MERTK/TFF3/HTR7/MTF2/TMEM109/IPO13/TRIP10/SH3GL3/TSC22D4/TGIF2
BENPORATH_ES_2	BENPORATH_ES_2	38	0.588486	1.91036	0.000440079	tags=53%, list=23%, signal=41%	GPR19/HELLS/PRDM14/LIN28A/L1TD1/DBNDD1/CYP26A1/ETV4/DNMT3A/DSCC1/SLC5A6/RRP9/ORC2/CDC25A/GJC1/MCM10/DTYMK/POU5F1/TDGF1/ERCC6L
REACTOME_SIGNALING_BY_TGF_BETA_RECEPTOR_COMPLEX	REACTOME_SIGNALING_BY_TGF_BETA_RECEPTOR_COMPLEX	71	0.530319	1.91025	8.1744e-05	tags=27%, list=9%, signal=24%	JUNB/PPP1R15A/SMAD7/FURIN/SERPINE1/NCOR2/SKIL/CBL/FKBP1A/MEN1/PMEPA1/TGIF1/PPP1CA/MYC/SMAD3/STUB1/RNF111/XPO1/WWTR1
DAZARD_UV_RESPONSE_CLUSTER_G4	DAZARD_UV_RESPONSE_CLUSTER_G4	18	0.708297	1.91018	0.000877291	tags=56%, list=17%, signal=46%	DUSP1/ZFP36/ARHGDIA/PFN1/TUBB4B/TUBB4A/CAPNS1/PPP2R1A/SOX15/APRT
KAN_RESPONSE_TO_ARSENIC_TRIOXIDE	KAN_RESPONSE_TO_ARSENIC_TRIOXIDE	114	0.488784	1.90981	1.46343e-05	tags=34%, list=19%, signal=28%	JUN/CXCL8/ATF3/GDF15/ADM/PPP1R15A/DDIT3/MT2A/SERPINE1/SLC30A1/MT1H/MT1X/MT1E/PLK2/ENO2/EIF4G1/AK4/RIT1/DDIT4/KCTD12/MT1F/MAP1LC3B/KLF12/TSC22D3/LDLR/SPANXB1/DKK1/LMNB1/HMOX1/ARHGAP6/MT1G/NDP/LGALS8/FABP7/JAG1/VAT1/GABARAPL1/DIRAS3/PODXL
ABE_VEGFA_TARGETS_30MIN	ABE_VEGFA_TARGETS_30MIN	28	0.632936	1.90807	0.00057216	tags=14%, list=0%, signal=14%	EGR1/HBEGF/CCN1/DUSP5
WP_LET7_INHIBITION_OF_ES_CELL_REPROGRAMMING	WP_LET7_INHIBITION_OF_ES_CELL_REPROGRAMMING	15	0.737328	1.90798	0.000596868	tags=13%, list=4%, signal=13%	EGR1/MYC
BIOCARTA_LAIR_PATHWAY	BIOCARTA_LAIR_PATHWAY	16	0.729425	1.90663	0.0006375	tags=19%, list=0%, signal=19%	TNF/CXCL8/IL6
WP_CELLS_AND_MOLECULES_INVOLVED_IN_LOCAL_ACUTE_INFLAMMATORY_RESPONSE	WP_CELLS_AND_MOLECULES_INVOLVED_IN_LOCAL_ACUTE_INFLAMMATORY_RESPONSE	16	0.729425	1.90663	0.0006375	tags=19%, list=0%, signal=19%	TNF/CXCL8/IL6
ONO_AML1_TARGETS_UP	ONO_AML1_TARGETS_UP	22	0.67095	1.90653	0.000760246	tags=9%, list=0%, signal=9%	FOS/JUN
KIM_WT1_TARGETS_8HR_UP	KIM_WT1_TARGETS_8HR_UP	155	0.463848	1.90519	3.49314e-06	tags=33%, list=17%, signal=28%	JUN/JUNB/HBEGF/ADM/HMGA1/KLF10/ARHGDIA/SOX9/SERPINE1/DNAJB1/GEM/SFN/SUPT6H/ZYX/DICER1/PCDH7/FOSL1/PDE10A/HNRNPUL1/STRN4/PLEC/CSF1/CBFB/MICALL1/ENO2/GOLIM4/BAIAP2/HSP90AA1/SERPINH1/PA2G4/CHST3/RLF/PIK3CD/SET/BMPR2/WWTR1/HIPK1/SERTAD2/RHOF/DOK4/DUSP7/SPEN/PIM1/MAP2K3/SLC7A1/SPRED2/SH3BP5/TRIB1/WT1/TM4SF1/ZC3HAV1
DALESSIO_TSA_RESPONSE	DALESSIO_TSA_RESPONSE	22	0.668754	1.90029	0.000815471	tags=14%, list=0%, signal=14%	FOS/ATF3/PPP1R15A
BIOCARTA_FCER1_PATHWAY	BIOCARTA_FCER1_PATHWAY	37	0.59143	1.90002	0.000619895	tags=24%, list=9%, signal=22%	FOS/JUN/NFATC3/SOS1/MAP2K7/PIK3R1/PLA2G4A/CALM1/GRB2
BIOCARTA_CCR5_PATHWAY	BIOCARTA_CCR5_PATHWAY	17	0.716369	1.89958	0.000832743	tags=29%, list=9%, signal=27%	FOS/JUN/PTK2B/CCL4/CALM1
SPIRA_SMOKERS_LUNG_CANCER_UP	SPIRA_SMOKERS_LUNG_CANCER_UP	37	0.59122	1.89934	0.000619895	tags=16%, list=1%, signal=16%	FOS/CXCL2/CXCL8/DUSP6/YWHAE/SOX9
BIOCARTA_INFLAM_PATHWAY	BIOCARTA_INFLAM_PATHWAY	27	0.634165	1.89851	0.0012473	tags=22%, list=9%, signal=20%	TNF/CXCL8/IL6/CSF1/HLA-DRB1/IL3
KERLEY_RESPONSE_TO_CISPLATIN_UP	KERLEY_RESPONSE_TO_CISPLATIN_UP	44	0.570757	1.89809	0.000537768	tags=30%, list=10%, signal=27%	IER3/GDF15/SERPINE1/PPM1D/FOSL1/BTG2/PIDD1/PLK2/DGKA/GADD45A/DDIT4/GLS2/FAS
WP_TGFBETA_RECEPTOR_SIGNALING	WP_TGFBETA_RECEPTOR_SIGNALING	54	0.55345	1.89789	0.00027378	tags=19%, list=5%, signal=18%	FOS/TNF/JUN/SMAD7/SERPINE1/SKIL/FKBP1A/TGIF1/EP300/SMAD3
WP_RANKLRANK_RECEPTOR_ACTIVATOR_OF_NFKB_LIGAND_SIGNALING_PATHWAY	WP_RANKLRANK_RECEPTOR_ACTIVATOR_OF_NFKB_LIGAND_SIGNALING_PATHWAY	52	0.553088	1.89741	0.000127401	tags=31%, list=9%, signal=28%	FOS/JUN/NFKBIA/NFKB2/SRC/MAP2K7/CBL/TRAF2/PIK3R1/GAB2/CTSK/ACP5/TAB1/TRAF3/TRAF5/FHL2
ELVIDGE_HYPOXIA_DN	ELVIDGE_HYPOXIA_DN	138	0.471431	1.89728	7.84661e-06	tags=34%, list=18%, signal=28%	PPIF/SLCO3A1/OGDH/GPATCH2/GDPD3/CTPS1/TOR3A/ARHGDIA/CHKA/TMEM259/STIP1/SLC29A1/SRM/KLC2/CDV3/KPNA1/SPAG1/GAS2L1/MAZ/DNAJA1/ASPSCR1/AMD1/CORO1A/CORO1B/ATP2A3/ALDH4A1/SRSF1/CALM1/ILRUN/PUS1/SLC35C1/GCH1/ADORA1/SLC5A6/PSEN2/PIK3R3/CCDC86/RMC1/POLR3E/BRMS1/DHX29/SUMO3/SCYL2/BAK1/EEF1E1/POLR3K/GLYR1
LAIHO_COLORECTAL_CANCER_SERRATED_DN	LAIHO_COLORECTAL_CANCER_SERRATED_DN	78	0.516189	1.89612	5.93036e-05	tags=36%, list=14%, signal=31%	SIN3B/PRRC2A/AKAP17A/GRINA/MTA1/ATN1/SCAF4/CPNE1/CCDC9/SNHG17/DLGAP4/FBXO46/SLC26A6/SPOP/GTF2IRD1/RAB15/EPHB2/KDM5C/NPEPPS/F8A1/DDX11/RCBTB1/TNPO2/HUWE1/NFATC2IP/NEK3/MED12/CCNJ
GARGALOVIC_RESPONSE_TO_OXIDIZED_PHOSPHOLIPIDS_YELLOW_UP	GARGALOVIC_RESPONSE_TO_OXIDIZED_PHOSPHOLIPIDS_YELLOW_UP	31	0.608652	1.89045	0.000267579	tags=52%, list=20%, signal=41%	NAV3/GCLM/TNPO1/NUP153/ENTPD7/XPO1/KDM7A/PPP3R1/LDLR/HMOX1/TULP3/SLC7A1/C16orf72/OSGIN1/CHIC2/SGMS2
CHEN_HOXA5_TARGETS_9HR_UP	CHEN_HOXA5_TARGETS_9HR_UP	210	0.445904	1.89042	3.22254e-07	tags=29%, list=16%, signal=25%	EGR1/FOS/JUN/CXCL8/JUNB/DUSP6/ATF3/FOSB/IER2/DUSP5/NFKBIA/GPATCH2/C21orf91/KLF10/GEM/RABGGTB/KHDC4/SCG5/TLK2/AKIRIN1/CRY1/KLF6/SUPT20H/NFIL3/KRCC1/PRPF38B/TIPARP/ZCCHC10/CCNL1/CREB5/WAC/EIF5/RLF/RNF111/BACH1/CAB39/RSRC2/TNFRSF10B/FAM13B/TAF1A/INTS6/PYROXD1/ZNF155/HLX/TDG/FNBP4/MTHFD2L/DUSP8/TUT7/CNOT4/NEMF/ZNF557/MCL1/BIRC3/PTBP2/ARIH1/SLTM/NRBF2/PPIG/CLEC4A/ARID4B
UDAYAKUMAR_MED1_TARGETS_DN	UDAYAKUMAR_MED1_TARGETS_DN	223	0.440997	1.88908	3.39121e-07	tags=34%, list=19%, signal=28%	JUNB/ATF3/ADM/DUSP5/ADAMTS1/BAX/TRIO/TNFSF9/RBPMS/PPM1D/TRAFD1/ST3GAL4/C11orf95/PCDH7/SMTN/SEC61A2/RASSF1/FOXK2/PLK2/DNAJB6/SAP30L/ERF/REPS2/MTCL1/NFE2L1/PNN/GADD45A/RASSF9/WDR45/UPF1/DDX11/FAM13B/ABTB2/INTS6/SPTAN1/AGAP1/FAS/MAP1LC3B/ADCY9/ZXDA/EFNA1/H1-0/CNPPD1/RTN2/ZXDB/TSC22D3/EPB41L4B/EIF2AK3/ELF4/PXDC1/PIK3R3/ATG14/PFDN6/MEX3D/DKK1/GDPD5/HMOX1/RETREG2/PTBP2/PIM1/RSRP1/TLE3/TRIB1/INPPL1/AXL/…
BIOCARTA_CARDIACEGF_PATHWAY	BIOCARTA_CARDIACEGF_PATHWAY	18	0.700275	1.88854	0.00117762	tags=28%, list=4%, signal=27%	FOS/JUN/EDN1/ADAM12/MYC
WP_EGFEGFR_SIGNALING_PATHWAY	WP_EGFEGFR_SIGNALING_PATHWAY	156	0.458833	1.88683	1.01228e-05	tags=33%, list=19%, signal=27%	FOS/JUN/FOSB/SPRY2/ARHGEF1/MAP2K2/VAV3/SOS1/SRC/MAP3K3/VAV2/ELK4/CBL/PTK2B/PEBP1/PIK3R1/MAPK7/MAP2K5/ERRFI1/MAP3K4/REPS2/AP2A1/MEF2A/GAB2/STAT5B/RIN1/GAB1/GRB2/STAT5A/AP2M1/AKT1/RASA1/RPS6KA2/AP2S1/CRKL/PRKCB/BCAR1/RPS6KA3/CAV1/INPPL1/ASAP1/MAPK14/LIMK2/PXDN/EIF4EBP1/SH3GL3/STXBP1/NCK2/ATF1/AURKA/IQSEC1
HOFMANN_MYELODYSPLASTIC_SYNDROM_RISK_UP	HOFMANN_MYELODYSPLASTIC_SYNDROM_RISK_UP	22	0.663683	1.88588	0.000989644	tags=32%, list=10%, signal=29%	IER3/GDF15/STIP1/MLF2/CDK2AP2/DUSP14/PTPRN
JEON_SMAD6_TARGETS_UP	JEON_SMAD6_TARGETS_UP	24	0.646723	1.88374	0.00181378	tags=42%, list=16%, signal=35%	JUN/CXCL8/TRIO/SERPINE1/CSF1/SERPINH1/FAS/TIMP2/TRIB1/PSMB8
BLANCO_MELO_COVID19_BRONCHIAL_EPITHELIAL_CELLS_SARS_COV_2_INFECTION_UP	BLANCO_MELO_COVID19_BRONCHIAL_EPITHELIAL_CELLS_SARS_COV_2_INFECTION_UP	135	0.468431	1.87901	2.1011e-05	tags=19%, list=11%, signal=17%	CXCL2/TNF/IER3/CXCL8/IL6/HBEGF/SPRY4/NFKBIA/CXCL1/NFKB2/EDN1/TRIM47/SOCS3/IL1B/P2RY6/ADAM8/CORO1A/LTB/ZC3H12A/IL32/TGM2/BCL3/RHOF/STAT5A/PARP12/EFNA1
WP_RESISTIN_AS_A_REGULATOR_OF_INFLAMMATION	WP_RESISTIN_AS_A_REGULATOR_OF_INFLAMMATION	30	0.609978	1.87854	0.00099858	tags=13%, list=0%, signal=13%	TNF/CXCL8/IL6/NFKBIA
REACTOME_REGULATION_OF_PTEN_GENE_TRANSCRIPTION	REACTOME_REGULATION_OF_PTEN_GENE_TRANSCRIPTION	58	0.537995	1.87795	0.000153157	tags=26%, list=9%, signal=24%	EGR1/JUN/GATAD2B/HDAC7/GATAD2A/MTA1/ATN1/REST/CBX4/MAF1/SCMH1/PHC3/EED/MBD3/CBX8
LENAOUR_DENDRITIC_CELL_MATURATION_DN	LENAOUR_DENDRITIC_CELL_MATURATION_DN	122	0.475239	1.87774	1.20984e-05	tags=17%, list=8%, signal=16%	CXCL2/TNF/IER3/CXCL8/DUSP6/PPIF/PRRC2A/NFKBIA/IL1B/PTK2B/PPP2R5D/EMP3/BTG2/NFYC/MARCKSL1/LHFPL2/CTSK/NAP1L4/CORO1A/PDLIM7/ATP2A3
KRIGE_AMINO_ACID_DEPRIVATION	KRIGE_AMINO_ACID_DEPRIVATION	28	0.622522	1.87667	0.000864466	tags=36%, list=8%, signal=33%	CXCL8/ATF3/PPP1R15A/DDIT3/SLC38A2/WARS1/SESN2/GADD45A/CCNG2/DDIT4
MAHAJAN_RESPONSE_TO_IL1A_UP	MAHAJAN_RESPONSE_TO_IL1A_UP	72	0.517717	1.87483	0.000173791	tags=24%, list=12%, signal=21%	DUSP1/CXCL2/IL6/HBEGF/NFRKB/EDN1/B4GALT1/IL1B/MYC/PPARA/GFRA2/AKAP8L/PTP4A3/FSTL3/PIM2/CCL5/MAFK
WP_CORTICOTROPINRELEASING_HORMONE_SIGNALING_PATHWAY	WP_CORTICOTROPINRELEASING_HORMONE_SIGNALING_PATHWAY	84	0.501714	1.87236	6.16955e-05	tags=27%, list=18%, signal=23%	FOS/CXCL8/JUNB/TRIM28/FOSB/NFKBIA/GNAI2/FOSL1/ARRB2/HSP90AA1/BCL2/JUP/GNAO1/AKT1/ARRB1/MAP3K5/GSK3B/CASP12/PRKCB/CASP9/MAPK14/GNAS/GRK6
WP_SARSCOV2_INNATE_IMMUNITY_EVASION_AND_CELLSPECIFIC_IMMUNE_RESPONSE	WP_SARSCOV2_INNATE_IMMUNITY_EVASION_AND_CELLSPECIFIC_IMMUNE_RESPONSE	61	0.534812	1.87102	0.000149156	tags=23%, list=9%, signal=21%	CXCL2/TNF/CXCL8/IL6/CXCL1/BSG/TRAF2/EP300/SMAD3/CCL4/TRADD/TRAF3/TRAF5/IFNAR2
RODRIGUES_NTN1_TARGETS_DN	RODRIGUES_NTN1_TARGETS_DN	149	0.457995	1.86984	1.14016e-05	tags=44%, list=24%, signal=34%	IER3/DUSP6/SULT1A2/HNRNPM/SOX9/PIP5K1A/FLNB/NUMA1/DGKD/CBL/MAGI1/SHB/ID1/LIMK1/TNFRSF25/CDK18/ARRB2/WNK1/RBMS2/CACNA1I/NECTIN2/PIP5K1B/HNRNPD/RIT1/HECTD1/DMPK/HLA-DRB1/OGFR/PACSIN2/CAMK2G/GAA/MINK1/RHOF/KLF2/ADORA1/RNF213/RRBP1/EPOR/CNOT4/SPEN/FN1/SULT1A1/SEZ6L2/TIAF1/CHRM1/CDK13/MYO1A/KIFC2/EPB41L2/MYLK/ITGB4/GDA/CTSE/IRF9/CUL4A/BCAM/BIN1/AHNAK/CYSLTR1/SFXN3/NASP/HSPG2/PAXBP1/MYH14/PIK3CA/MMP15
DACOSTA_ERCC3_ALLELE_XPCS_VS_TTD_UP	DACOSTA_ERCC3_ALLELE_XPCS_VS_TTD_UP	27	0.622028	1.86218	0.00193209	tags=37%, list=14%, signal=32%	FOS/MDK/PCDH7/EPB41L3/RIMS2/TGM2/PTPRN/ADORA1/KCNG1/IGFBP2
NIKOLSKY_BREAST_CANCER_21Q22_AMPLICON	NIKOLSKY_BREAST_CANCER_21Q22_AMPLICON	16	0.712128	1.86142	0.00123355	tags=56%, list=15%, signal=48%	SPATC1L/LSS/COL6A2/SLC19A1/COL6A1/POFUT2/FTCD/DIP2A/YBEY
WP_SENESCENCE_AND_AUTOPHAGY_IN_CANCER	WP_SENESCENCE_AND_AUTOPHAGY_IN_CANCER	98	0.489405	1.86058	2.94593e-05	tags=34%, list=19%, signal=28%	JUN/CXCL8/IL6/HMGA1/CXCL1/MMP14/SERPINE1/COL3A1/SRC/IL1B/FKBP8/AKT1S1/SMAD3/BCL2/IL3/ATG16L1/GABARAPL2/IGF1R/MAP1LC3B/MAP1LC3A/ATG14/GSK3B/KMT2A/MAP2K3/FN1/CD44/IRF5/ING2/IL6R/MAPK14/SLC39A1/ATG10/GABARAPL1
ZHANG_PROLIFERATING_VS_QUIESCENT	ZHANG_PROLIFERATING_VS_QUIESCENT	49	0.548144	1.86024	0.000466603	tags=22%, list=9%, signal=20%	CXCL2/JUN/CXCL8/GSTM1/DDIT3/BAX/MARCKSL1/HSP90AA1/GADD45A/CCNG2/GRB2
COULOUARN_TEMPORAL_TGFB1_SIGNATURE_UP	COULOUARN_TEMPORAL_TGFB1_SIGNATURE_UP	104	0.483244	1.85793	5.50376e-05	tags=25%, list=9%, signal=23%	IER3/BHLHE40/CXCL1/SMAD7/GRB7/CSNK1E/SOX9/SLC29A1/SERPINE1/SLC48A1/UAP1L1/SKIL/PMEPA1/TGIF1/NET1/AMD1/ZCCHC10/PDLIM7/PICALM/DDIT4/NBEAL1/SQLE/PIP4K2B/SLC6A8/BCL3/NGF
WANG_LSD1_TARGETS_DN	WANG_LSD1_TARGETS_DN	36	0.576179	1.8564	0.00121981	tags=19%, list=8%, signal=18%	EGR1/FOS/JUNB/DLL3/PCSK1N/RIMS2/GADD45A
YAO_TEMPORAL_RESPONSE_TO_PROGESTERONE_CLUSTER_5	YAO_TEMPORAL_RESPONSE_TO_PROGESTERONE_CLUSTER_5	31	0.597611	1.85616	0.000467143	tags=13%, list=1%, signal=13%	IER3/ATF3/ADM/KLF10
BIOCARTA_NGF_PATHWAY	BIOCARTA_NGF_PATHWAY	18	0.6881	1.85571	0.00169971	tags=33%, list=9%, signal=30%	FOS/JUN/SOS1/PIK3R1/GRB2/NGF
REACTOME_SIGNALING_BY_EGFR	REACTOME_SIGNALING_BY_EGFR	46	0.554077	1.8535	0.000382019	tags=28%, list=11%, signal=25%	HBEGF/SPRY1/SPRY2/SOS1/SRC/AAMP/CBL/PIK3R1/ADAM12/PTPN3/GAB1/GRB2/PAG1
BORLAK_LIVER_CANCER_EGF_UP	BORLAK_LIVER_CANCER_EGF_UP	52	0.540047	1.85267	0.000226586	tags=17%, list=4%, signal=17%	FOS/JUNB/ATF3/SERPINE1/RAB3D/TWF2/ID1/BTG2/TGIF1
MCCLUNG_COCAIN_REWARD_4WK	MCCLUNG_COCAIN_REWARD_4WK	70	0.515777	1.85177	0.000195841	tags=17%, list=7%, signal=16%	FOS/DUSP1/DUSP6/CORO2B/KLF10/GPAA1/DNAJB1/ZDHHC6/DNAJC5/WNK1/KIF1B/TECTB
DAUER_STAT3_TARGETS_UP	DAUER_STAT3_TARGETS_UP	48	0.545197	1.8509	0.00063006	tags=25%, list=5%, signal=24%	JUN/ATF3/ADM/ZFP36/DUSP5/FLNB/SOCS3/SAMD4A/PFKFB3/FOSL1/BCL6/KLF11
WP_TNF_ALPHA_SIGNALING_PATHWAY	WP_TNF_ALPHA_SIGNALING_PATHWAY	87	0.49461	1.85011	0.000105974	tags=32%, list=14%, signal=28%	TNF/JUN/IL6/NFKBIA/BAX/APAF1/NFKB2/SOS1/MAP3K3/MAP2K7/MADD/TRAF2/GLUL/HSP90AA1/TRADD/RFFL/TAB1/BCL2L1/GRB2/RFK/PPP2CA/NFKBIB/AKT1/TNFRSF1A/MAP3K5/CSNK2A1/BIRC3/MAP2K3
MARKS_HDAC_TARGETS_DN	MARKS_HDAC_TARGETS_DN	13	0.740806	1.84943	0.00266197	tags=46%, list=10%, signal=41%	TNF/IL6/IL1B/BCL2/BCL2L1/STAT5A
ALTEMEIER_RESPONSE_TO_LPS_WITH_MECHANICAL_VENTILATION	ALTEMEIER_RESPONSE_TO_LPS_WITH_MECHANICAL_VENTILATION	116	0.469692	1.84813	7.38128e-05	tags=15%, list=5%, signal=14%	CXCL2/JUNB/ATF3/IL6/ADM/NFKBIA/CTPS1/MT1A/TNFSF9/SERPINE1/GEM/SOCS3/IL1B/MT1X/PFKFB3/NFIL3/MARCKSL1
MURAKAMI_UV_RESPONSE_6HR_DN	MURAKAMI_UV_RESPONSE_6HR_DN	19	0.673759	1.84737	0.000679948	tags=11%, list=0%, signal=11%	EGR1/IL6
OUYANG_PROSTATE_CANCER_PROGRESSION_UP	OUYANG_PROSTATE_CANCER_PROGRESSION_UP	19	0.673673	1.84713	0.000687719	tags=11%, list=0%, signal=11%	FOS/JUN
DEBOSSCHER_NFKB_TARGETS_REPRESSED_BY_GLUCOCORTICOIDS	DEBOSSCHER_NFKB_TARGETS_REPRESSED_BY_GLUCOCORTICOIDS	19	0.673483	1.84661	0.000687719	tags=37%, list=12%, signal=33%	TNF/CXCL8/IL6/EDN1/IL9/IL3/CCL5
MILI_PSEUDOPODIA_CHEMOTAXIS_DN	MILI_PSEUDOPODIA_CHEMOTAXIS_DN	396	0.409547	1.84315	1.66324e-08	tags=28%, list=16%, signal=24%	FOS/DUSP1/FOSB/ZFP36/SYVN1/SLC38A2/SOD3/PPP6R3/FAM53B/ATRN/CHKA/ABHD12/TNFSF9/LY6E/SLC29A1/MMP14/SERPINE1/FLNB/GPAA1/PKD1/CLCF1/ABCC5/ZSWIM8/SOCS3/MED15/CDS2/ALKBH1/BMP1/ARHGAP17/TAP2/SEC61A2/MPZL1/MAPK8IP3/CPSF7/SLC23A2/GALNT18/KLF6/TGIF1/CCNY/RGS3/HLA-A/CLSTN1/SLC12A4/SIGMAR1/ADAMTSL4/USP7/SEMA3F/BAIAP2/C6orf89/AP2A2/LHFPL2/TMPPE/DHX30/PDE7A/CHPF/SBNO2/SELENOS/GPR108/LTBP4/PAN3/NDEL1/PIM3/CKAP4…
HUTTMANN_B_CLL_POOR_SURVIVAL_UP	HUTTMANN_B_CLL_POOR_SURVIVAL_UP	258	0.426364	1.84171	4.14199e-07	tags=30%, list=18%, signal=25%	DUSP6/PPP1R15A/PRRC2A/DUSP5/SNRNP70/ARHGAP44/OGDH/KLF10/ATP6V0C/ARHGEF1/ARHGDIA/TMEM259/GRINA/NUMA1/DAPK3/MED15/ZYX/SLC25A1/IP6K1/DCAF15/IL17RB/HNRNPUL1/PARVB/BTG2/CBX4/CRY1/CLPTM1/DNM2/MYO9B/LDOC1/GLUL/GUSBP11/RNH1/L1TD1/ATP5F1D/MAN2C1/PTPN18/RFXANK/RHOT2/ATP2A3/OGFR/C1orf159/PSD3/GALNT2/GAA/MAD1L1/PRKCSH/LTK/STXBP2/ST6GALNAC4/IGF1R/RNF41/PIM2/ANKRD55/POLM/RXRA/C4A/RRBP1/PIPOX/ROGDI/SERTAD3/HOME…
BIOCARTA_41BB_PATHWAY	BIOCARTA_41BB_PATHWAY	17	0.694462	1.84149	0.00202438	tags=24%, list=4%, signal=23%	JUN/NFKBIA/TNFSF9/TRAF2
KYNG_WERNER_SYNDROM_DN	KYNG_WERNER_SYNDROM_DN	18	0.682611	1.84091	0.00211271	tags=39%, list=4%, signal=38%	BHLHE40/TIMD4/PWWP2A/MT1X/KDSR/IL17RB/PMEPA1
WP_INSULIN_SIGNALING	WP_INSULIN_SIGNALING	152	0.449958	1.84041	1.31534e-05	tags=26%, list=16%, signal=22%	EGR1/FOS/JUN/SH2B2/MAP2K2/PIK3C2A/TSC1/SOS1/MAP3K3/SOCS3/MAP2K7/CBL/CYTH3/PIK3R1/MAPK7/MAP2K5/IRS1/MAP3K4/PRKCH/GAB1/PIK3CD/MINK1/GRB2/STXBP2/IGF1R/TSC2/AKT1/PFKL/PIK3R3/MAP3K5/GSK3B/RPS6KA2/PTPRF/MAP2K3/PRKCB/MAP3K11/RPS6KA3/RHEB/RHOJ/INPPL1
MARZEC_IL2_SIGNALING_UP	MARZEC_IL2_SIGNALING_UP	106	0.475311	1.83894	0.000136793	tags=43%, list=24%, signal=33%	IER3/CXCL8/DUSP6/CSRNP1/PHLDA1/CTPS1/IL17RB/MYC/BCL2/PRKX/NOP2/TNFAIP8/TNFRSF18/BCL2L1/GNL3/PUS1/ADCY9/DKC1/POLR1C/DUSP7/HK2/BIRC3/PIM1/PTPN7/SPRED2/WT1/EEF1E1/POLR3K/DHODH/CDC25A/OSM/TNFRSF4/HSPD1/IL5/MAPKAPK2/POLR2D/CCNE1/PDCD11/LIF/DUSP2/BCCIP/DLST/CDC6/BMP2/CSF2RA/FGFR1
WP_TGFBETA_RECEPTOR_SIGNALLING_IN_SKELETAL_DYSPLASIAS	WP_TGFBETA_RECEPTOR_SIGNALLING_IN_SKELETAL_DYSPLASIAS	58	0.526135	1.83655	0.000267755	tags=17%, list=5%, signal=16%	FOS/TNF/JUN/SMAD7/SERPINE1/SKIL/FKBP1A/TGIF1/EP300/SMAD3
PID_EPHA2_FWD_PATHWAY	PID_EPHA2_FWD_PATHWAY	19	0.669661	1.83613	0.000804357	tags=53%, list=16%, signal=44%	EPHA2/VAV3/SRC/VAV2/CBL/PIK3R1/GRB2/EFNA1/BCAR1/INPPL1
PID_REG_GR_PATHWAY	PID_REG_GR_PATHWAY	79	0.498499	1.83582	0.000155782	tags=24%, list=14%, signal=21%	EGR1/FOS/JUN/CXCL8/IL6/BAX/SFN/NCOA1/EP300/HSP90AA1/STAT5B/POU2F1/FGG/STAT5A/AKT1/GSK3B/KRT17/NR1I3/PRKACG
DUTTA_APOPTOSIS_VIA_NFKB	DUTTA_APOPTOSIS_VIA_NFKB	30	0.595959	1.83536	0.00151752	tags=30%, list=10%, signal=27%	TNF/IER3/BAX/TRAF2/BCL2/TERT/TNFRSF10B/BCL2L1/FAS
WP_MIRNAS_INVOLVEMENT_IN_THE_IMMUNE_RESPONSE_IN_SEPSIS	WP_MIRNAS_INVOLVEMENT_IN_THE_IMMUNE_RESPONSE_IN_SEPSIS	54	0.535039	1.83475	0.000686879	tags=17%, list=9%, signal=15%	TNF/CXCL8/IL6/NFKBIA/NFKB2/CCL4/TAB1/TRAF3/MIR106B
ZHANG_RESPONSE_TO_IKK_INHIBITOR_AND_TNF_UP	ZHANG_RESPONSE_TO_IKK_INHIBITOR_AND_TNF_UP	204	0.434009	1.83473	2.40353e-06	tags=23%, list=12%, signal=20%	CXCL2/CXCL8/ATF3/HBEGF/NAV3/NUAK2/NFKBIA/SLCO3A1/KDM2A/CXCL1/RNF19B/NFKB2/SPSB1/EDN1/SOCS3/IL1B/SAMD4A/MFHAS1/BTG2/IRF6/BAZ1A/KLF6/SDC4/DNAJB6/MARCKSL1/SMAD3/PNRC1/CYTH1/RAB24/TNFAIP8/CCNG2/TNFRSF10B/DDIT4/ZC3H12A/IL32/TRIM15/ABTB2/BCL3/GPR132/GRHL3/GCH1/RHOF/PAG1/EFNA1/KDM7A/CCL5
WP_PHOTODYNAMIC_THERAPYINDUCED_NFE2L2_NRF2_SURVIVAL_SIGNALING	WP_PHOTODYNAMIC_THERAPYINDUCED_NFE2L2_NRF2_SURVIVAL_SIGNALING	21	0.652805	1.83281	0.0020029	tags=24%, list=1%, signal=24%	FOS/JUN/EPHX1/GCLM/SRXN1
RICKMAN_METASTASIS_DN	RICKMAN_METASTASIS_DN	240	0.426273	1.83222	5.57334e-07	tags=31%, list=15%, signal=27%	NUAK2/TAGLN2/OGDH/BSG/FAM53B/RNF19B/MAP2K2/AGAP3/TMEM259/TNFSF9/MIER2/CKMT1B/TRAFD1/S100A16/SFN/PKM/TFEB/DAPK3/MAP2K7/RNF126/PTK2B/TAP2/NLRP1/CENPT/ZBTB7A/PAX8/GAS2L1/TSPAN14/IRF6/CACTIN/TRIR/DNM2/ADAMTSL4/SEMA3F/BAIAP2/RNH1/KEAP1/RHOG/ATP5F1D/LMF2/SLC19A1/TNFAIP8/SPRR1B/JUP/PDLIM1/DENND1A/BCL2L1/SLC6A8/JPT1/ATP2B4/GIPC1/STXBP2/ST6GALNAC4/SGPL1/CLK3/AKIRIN2/CDCP1/RHOF/TNPO2/SNX33/ATP6V1B2/RXRA/SC…
GARY_CD5_TARGETS_UP	GARY_CD5_TARGETS_UP	448	0.403882	1.83218	8.46388e-10	tags=25%, list=13%, signal=22%	JUNB/AGRN/PRRC2A/DUSP5/SAMD1/SLC38A2/NFKBIA/HMGA1/AKAP13/PKN1/YWHAE/ATXN2L/AGPAT1/TAF15/CSNK1E/TOR3A/ARHGDIA/TRIO/MAP2K2/NFKB2/TNFSF9/UCP2/PACS1/FAM102A/MRPL2/GRINA/CD52/MTA1/GNAI2/KDM4B/METRNL/CALML4/CPNE1/DAPK3/LSS/SIPA1/KPNA1/SLC25A1/HNRNPUL1/MFHAS1/LCK/PARVB/HELLS/FOXK2/STRN4/PHF14/BTG2/NME4/MARCHF9/MAZ/BTBD7/SPOP/PHF13/ENO2/STX17/R3HDM2/WARS1/PPARA/ZNF318/AP2A1/GATAD1/TMC6/WNK1/MAP1S/BCL2/TA…
BILANGES_SERUM_SENSITIVE_VIA_TSC2	BILANGES_SERUM_SENSITIVE_VIA_TSC2	30	0.594588	1.83114	0.00154897	tags=30%, list=7%, signal=28%	CCN1/GBF1/COL3A1/NUMA1/DICER1/KIFC1/SMG6/KIF1B/ATP1A1
WP_OXIDATIVE_STRESS	WP_OXIDATIVE_STRESS	32	0.58138	1.82882	0.00177664	tags=16%, list=2%, signal=15%	FOS/JUNB/SOD3/NFIX/MT1X
AMIT_SERUM_RESPONSE_20_MCF10A	AMIT_SERUM_RESPONSE_20_MCF10A	15	0.706538	1.8283	0.00218756	tags=47%, list=14%, signal=40%	JUN/DUSP6/SLC5A3/EPOR/DGKH/ITGB1BP1/SORBS3
GINESTIER_BREAST_CANCER_20Q13_AMPLIFICATION_DN	GINESTIER_BREAST_CANCER_20Q13_AMPLIFICATION_DN	166	0.441551	1.82723	1.14571e-05	tags=37%, list=18%, signal=30%	PRRC2A/NAA16/AKAP13/SF1/PASK/FURIN/KDM4A/CAPN15/CALML4/KHDC4/EHMT2/WDTC1/MADD/ARHGAP17/TINAGL1/SLC23A2/SUPT20H/TNFRSF25/DNM2/KIFC1/MYO9B/EIF4G1/ZNF318/TMC6/CCDC93/TAZ/SBNO2/MCM5/TAPBP/CCNL1/CYTH1/ANKLE2/HNRNPD/PNN/CLASRP/DNHD1/CAMK2G/DDX11/ASMTL-AS1/CDC42SE1/SET/CLK3/HLX/FNBP4/SLC15A4/RUBCN/LARP1/CCNJ/PCGF6/AGO4/DXO/RABGAP1/ST14/ZNF436-AS1/PML/MKI67/PPARD/PTBP1/LENG8/GTPBP2/RBM26
KEGG_NEUROTROPHIN_SIGNALING_PATHWAY	KEGG_NEUROTROPHIN_SIGNALING_PATHWAY	120	0.463927	1.82498	6.74358e-05	tags=32%, list=17%, signal=26%	JUN/SH2B2/NFKBIA/BAX/YWHAE/ARHGDIA/MAP2K2/MAGED1/SOS1/MAP3K3/MAP2K7/PIK3R1/MAPK7/MAP2K5/IRS1/BCL2/KIDINS220/CAMK4/CAMK2G/GAB1/PIK3CD/CALM1/GRB2/NGF/NFKBIB/AKT1/PIK3R3/MAP3K5/GSK3B/RPS6KA2/NTRK1/CRKL/RPS6KA3/IRAK1/YWHAZ/MAPK14/NTRK3/NTF4
WP_OLIGODENDROCYTE_SPECIFICATION_AND_DIFFERENTIATION_LEADING_TO_MYELIN_COMPONENTS_FOR_CNS	WP_OLIGODENDROCYTE_SPECIFICATION_AND_DIFFERENTIATION_LEADING_TO_MYELIN_COMPONENTS_FOR_CNS	30	0.592515	1.82476	0.00165936	tags=17%, list=2%, signal=16%	CXCL2/TNF/CXCL1/SOX9/IL1B
BIOCARTA_FREE_PATHWAY	BIOCARTA_FREE_PATHWAY	10	0.791073	1.8247	0.00096986	tags=20%, list=0%, signal=20%	TNF/CXCL8
RAY_ALZHEIMERS_DISEASE	RAY_ALZHEIMERS_DISEASE	11	0.768172	1.82324	0.00110114	tags=55%, list=12%, signal=48%	TNF/CXCL8/CSF1/GDNF/IL3/CCL5
BIOCARTA_ARENRF2_PATHWAY	BIOCARTA_ARENRF2_PATHWAY	20	0.656269	1.82302	0.00250691	tags=40%, list=15%, signal=34%	FOS/JUN/MAFG/KEAP1/POR/MAFK/HMOX1/PRKCB
KEGG_T_CELL_RECEPTOR_SIGNALING_PATHWAY	KEGG_T_CELL_RECEPTOR_SIGNALING_PATHWAY	100	0.477901	1.82105	7.86727e-05	tags=14%, list=5%, signal=13%	FOS/TNF/JUN/NFKBIA/MAP2K2/VAV3/NFATC3/SOS1/VAV2/MAP2K7/CBL/LCK/PIK3R1/PAK4
NEWMAN_ERCC6_TARGETS_UP	NEWMAN_ERCC6_TARGETS_UP	24	0.625028	1.82055	0.00325835	tags=8%, list=0%, signal=8%	CXCL2/CXCL8
PID_RET_PATHWAY	PID_RET_PATHWAY	38	0.560769	1.82038	0.00119215	tags=32%, list=13%, signal=28%	JUN/GRB7/SOS1/SRC/PIK3R1/GDNF/IRS1/PDLIM7/GAB1/GRB2/DOK4/RASA1
WP_IL4_SIGNALING_PATHWAY	WP_IL4_SIGNALING_PATHWAY	53	0.529958	1.81909	0.00119352	tags=30%, list=12%, signal=27%	FOS/NFKBIA/SOS1/SOCS3/CBL/SOCS5/NFIL3/PIK3R1/EP300/IRS1/GAB2/STAT5B/PIK3CD/GRB2/STAT5A/AKT1
HESS_TARGETS_OF_HOXA9_AND_MEIS1_DN	HESS_TARGETS_OF_HOXA9_AND_MEIS1_DN	74	0.497969	1.81844	0.000299852	tags=22%, list=15%, signal=18%	EGR1/FOS/DUSP1/ZFP36/PHLDA1/IL1B/BTG2/MSR1/MRC1/LSP1/MYADM/IL1R2/GCNT2/MCL1/MS4A6A/MERTK
PID_NFKAPPAB_CANONICAL_PATHWAY	PID_NFKAPPAB_CANONICAL_PATHWAY	20	0.654394	1.81781	0.00273046	tags=30%, list=12%, signal=26%	TNF/NFKBIA/ATM/ERC1/XPO1/TNFRSF1A
GARGALOVIC_RESPONSE_TO_OXIDIZED_PHOSPHOLIPIDS_GREEN_UP	GARGALOVIC_RESPONSE_TO_OXIDIZED_PHOSPHOLIPIDS_GREEN_UP	25	0.617798	1.8167	0.00301265	tags=32%, list=13%, signal=28%	DUSP6/STIP1/SIK1/GEM/SOCS3/CSNK1G1/IFNE/LDLR
WP_ZINC_HOMEOSTASIS	WP_ZINC_HOMEOSTASIS	35	0.564819	1.81663	0.00295638	tags=49%, list=22%, signal=38%	MT2A/MT1A/SLC30A1/MT1H/MT1X/MT1E/MT3/MT1F/SLC39A7/SLC39A5/MT1M/MT1G/SLC30A8/SLC39A1/SLC39A6/SLC30A6/SLC39A14
WP_BLADDER_CANCER	WP_BLADDER_CANCER	39	0.558065	1.81653	0.00197318	tags=21%, list=4%, signal=20%	CXCL8/HBEGF/MAP2K2/SRC/DAPK3/RASSF1/PIK3R1/MYC
GROSS_ELK3_TARGETS_DN	GROSS_ELK3_TARGETS_DN	29	0.598525	1.81606	0.00267169	tags=17%, list=2%, signal=17%	BHLHE40/IL6/CSRNP1/ADAMTS1/SOCS3
PHONG_TNF_RESPONSE_VIA_P38_COMPLETE	PHONG_TNF_RESPONSE_VIA_P38_COMPLETE	217	0.425946	1.81605	1.54744e-06	tags=32%, list=18%, signal=26%	EGR1/FOS/ATF3/AGRN/NAV3/MAFG/PPP1R15A/DDIT3/CCN1/ZFP36/DUSP5/KDM2A/KLF10/GFPT1/CSNK1E/OTUD4/MNS1/FBRS/SVIL/NXF1/SOS1/B4GALT1/RPRD2/CBX4/BAZ1A/SV2A/TGIF1/TMEM51/ARHGAP12/CCNL1/DYRK2/BACH1/F8A1/SEC24D/PSD3/GOLPH3L/BCL3/AP1G2/PHIP/SLC5A3/ACOX1/MYO1B/YIPF5/HLA-B/MTHFD2L/NFATC2IP/TCAF1/STK11/FBXL5/TUT7/OBSL1/LARP1/MCL1/KMT2A/TCF20/MAP3K11/SLC7A1/HMBOX1/CAV1/SH3BP5/ARID4B/LGALS8/SATB2/WWC2/EVA1B/MKNK2/…
WP_APOPTOSISRELATED_NETWORK_DUE_TO_ALTERED_NOTCH3_IN_OVARIAN_CANCER	WP_APOPTOSISRELATED_NETWORK_DUE_TO_ALTERED_NOTCH3_IN_OVARIAN_CANCER	51	0.531963	1.81298	0.000725177	tags=24%, list=10%, signal=21%	TNF/IER3/PKN1/SMAD7/VAV3/SOCS3/PTK2B/HELLS/NET1/TNFRSF10B/BCL3/APP
MURAKAMI_UV_RESPONSE_24HR	MURAKAMI_UV_RESPONSE_24HR	18	0.672111	1.81259	0.00284341	tags=17%, list=5%, signal=16%	EGR1/IL6/DVL1
BROWNE_HCMV_INFECTION_8HR_UP	BROWNE_HCMV_INFECTION_8HR_UP	96	0.476435	1.81076	0.000152521	tags=28%, list=15%, signal=24%	FOS/RBM38/DNAJB1/ABCC5/KHDC4/CBX4/CRY1/DNAJA1/CSPG5/ERF/PLA2G4A/AMD1/AKAP8L/STAT5B/EIF5/TSFM/KPNA5/RCC1/CALM1/PIM2/FNBP4/DUSP8/DPAGT1/PLCL1/RSRP1/IGFBP2/CRKL
GARGALOVIC_RESPONSE_TO_OXIDIZED_PHOSPHOLIPIDS_MAGENTA_UP	GARGALOVIC_RESPONSE_TO_OXIDIZED_PHOSPHOLIPIDS_MAGENTA_UP	28	0.600276	1.80961	0.00186499	tags=32%, list=7%, signal=30%	CSRNP1/MAFG/PPP1R15A/KLF6/DNAJA1/TNPO1/LINC00622/KANSL1L/RIT1
CROMER_TUMORIGENESIS_UP	CROMER_TUMORIGENESIS_UP	57	0.520537	1.80939	0.000474544	tags=30%, list=17%, signal=25%	CXCL8/IL6/CXCL1/SERPINE1/COL3A1/IL1B/BMP1/SMOX/TNC/MYO1B/PTK7/KRT17/FN1/COL1A2/MFAP2/PXDN/NELL2
BIOCARTA_TRKA_PATHWAY	BIOCARTA_TRKA_PATHWAY	13	0.724103	1.80773	0.00458135	tags=77%, list=24%, signal=59%	SOS1/PIK3R1/GRB2/NGF/AKT1/NTRK1/PRKCB/SHC1/DPM2/PIK3CA
WP_ESTROGEN_SIGNALING_PATHWAY	WP_ESTROGEN_SIGNALING_PATHWAY	21	0.643698	1.80724	0.00283609	tags=14%, list=5%, signal=14%	FOS/JUN/BCL2
PID_HEDGEHOG_GLI_PATHWAY	PID_HEDGEHOG_GLI_PATHWAY	48	0.532251	1.80695	0.00104418	tags=35%, list=14%, signal=30%	SIN3B/CSNK1E/GNAI2/SPOP/CSNK1G3/ARRB2/PIAS1/CSNK1G1/SUFU/SAP18/XPO1/GNAO1/CSNK1D/GNG2/AKT1/GSK3B/CSNK1G2
ZHU_SKIL_TARGETS_UP	ZHU_SKIL_TARGETS_UP	18	0.669967	1.80681	0.00316111	tags=39%, list=8%, signal=36%	JUNB/PPP1R15A/SERPINE1/DENND2B/HYOU1/GADD45A/CCNG2
WP_PROLACTIN_SIGNALING_PATHWAY	WP_PROLACTIN_SIGNALING_PATHWAY	74	0.494707	1.80653	0.000371707	tags=28%, list=13%, signal=25%	FOS/JUN/NFKBIA/MAP2K2/SOS1/SRC/SOCS3/VAV2/CBL/PIK3R1/MYC/IRS1/GAB2/STAT5B/GRB2/NFKBIB/STAT5A/AKT1/GSK3B/NEK3/RPS6KA2
KRIEG_HYPOXIA_VIA_KDM3A	KRIEG_HYPOXIA_VIA_KDM3A	51	0.529692	1.80524	0.000777855	tags=31%, list=16%, signal=26%	JUNB/GDF15/ADM/PPP1R15A/CXCL1/SERPINE1/EDN1/MARCHF3/ZC3H12A/TGM2/VEZT/FABP6/HMOX1/BIRC3/SLC7A1/TM4SF1
FERRARI_RESPONSE_TO_FENRETINIDE_UP	FERRARI_RESPONSE_TO_FENRETINIDE_UP	20	0.649264	1.80356	0.0033056	tags=20%, list=0%, signal=20%	CXCL2/BHLHE40/ATF3/DDIT3
REACTOME_RESPONSE_OF_EIF2AK1_HRI_TO_HEME_DEFICIENCY	REACTOME_RESPONSE_OF_EIF2AK1_HRI_TO_HEME_DEFICIENCY	14	0.709053	1.80339	0.00321657	tags=21%, list=0%, signal=21%	ATF3/PPP1R15A/DDIT3
PARK_APL_PATHOGENESIS_DN	PARK_APL_PATHOGENESIS_DN	45	0.537333	1.80306	0.00107993	tags=29%, list=11%, signal=26%	CXCL8/JUNB/PRCC/SLC29A1/ZYX/SMOX/LYST/GLUL/CKAP4/CORO1A/IL32/APP/LSP1
PID_AR_TF_PATHWAY	PID_AR_TF_PATHWAY	52	0.525563	1.80299	0.000507245	tags=31%, list=13%, signal=27%	EGR1/JUN/PKN1/HDAC7/SRC/EHMT2/NCOA1/DNAJA1/EP300/HSP90AA1/POU2F1/NR2C2/PDE9A/RXRA/KAT7/GSK3B
CASORELLI_ACUTE_PROMYELOCYTIC_LEUKEMIA_UP	CASORELLI_ACUTE_PROMYELOCYTIC_LEUKEMIA_UP	151	0.440356	1.80098	4.41376e-05	tags=19%, list=11%, signal=17%	FOS/DUSP1/JUN/SIN3B/HBEGF/FOSB/ZFP36/SPRY2/NFKBIA/KLF10/SF1/SIK1/HELZ/ATP1B1/IDUA/NLRP1/PTPRE/KLF6/NFIL3/RAP1GAP2/ARHGAP25/CSGALNACT2/ATP2B4/SERPING1/MT1F/MAP1LC3B/FNDC3B/KLF2
WP_REGULATION_OF_TOLLLIKE_RECEPTOR_SIGNALING_PATHWAY	WP_REGULATION_OF_TOLLLIKE_RECEPTOR_SIGNALING_PATHWAY	128	0.454308	1.79785	8.3443e-05	tags=16%, list=9%, signal=14%	FOS/TNF/JUN/CXCL8/IL6/NFKBIA/MAP2K2/NFKB2/TRAFD1/IL1B/MAP2K7/RBCK1/PIK3R1/USP7/TOLLIP/CCL4/TAB1/TRAF3/PIK3CD/IFNAR2
SWEET_KRAS_TARGETS_UP	SWEET_KRAS_TARGETS_UP	79	0.488086	1.79747	0.000240709	tags=16%, list=7%, signal=15%	JUN/JUNB/BHLHE40/SERPINE1/MYL9/DENND2B/DICER1/BMP1/NLRP1/CADM1/PMEPA1/EPHB2/CHST3
PID_P53_DOWNSTREAM_PATHWAY	PID_P53_DOWNSTREAM_PATHWAY	134	0.448936	1.79714	7.68488e-05	tags=22%, list=11%, signal=20%	DUSP1/JUN/ATF3/GDF15/DUSP5/BAX/EPHA2/ARID3A/APAF1/SERPINE1/SFN/ZNF385A/BTG2/PIDD1/NFYC/TP53INP1/EP300/BCL6/BCL2/TP63/DROSHA/GADD45A/TNFRSF10B/DDIT4/BCL2L1/PRMT1/FAS/FOXA1/TADA2B/TSC2
PID_ENDOTHELIN_PATHWAY	PID_ENDOTHELIN_PATHWAY	62	0.513449	1.79653	0.000415024	tags=34%, list=19%, signal=28%	FOS/JUN/MAP2K2/GNAI2/EDN1/COL3A1/SRC/PTK2B/PLA2G4A/ADCY6/PRKCH/GNAO1/ADCY9/AKT1/PRKCB/BCAR1/ADCY1/COL1A2/MAPK14/ADCY8/SLC9A1
BROWNE_HCMV_INFECTION_10HR_UP	BROWNE_HCMV_INFECTION_10HR_UP	88	0.477888	1.79619	0.00025355	tags=25%, list=12%, signal=22%	JUNB/IL6/FOSB/AKAP17A/SULT1A2/TIAL1/ATRN/NXF1/NFATC3/SOS1/GBF1/PTPRE/DNAJB6/FEN1/EP300/TAF5L/POU2F1/SLC6A8/DIS3/CLP1/PCDH9/CCL5
HU_ANGIOGENESIS_UP	HU_ANGIOGENESIS_UP	20	0.646103	1.79478	0.00343397	tags=40%, list=18%, signal=33%	FOS/JADE2/PIK3R1/STUB1/PRODH/FAH/ITGB4/STXBP1
KEGG_MAPK_SIGNALING_PATHWAY	KEGG_MAPK_SIGNALING_PATHWAY	251	0.415548	1.79385	1.02901e-06	tags=26%, list=16%, signal=22%	FOS/DUSP1/TNF/JUN/DUSP6/DDIT3/DUSP5/MAP2K2/NFKB2/FLNB/SOS1/MAP3K3/IL1B/MAP2K7/ELK4/DUSP10/MAPK8IP3/TAOK2/TRAF2/PLA2G2C/MAPK7/MAP2K5/MYC/PLA2G4A/ARRB2/MAP3K4/DUSP14/CACNA1I/CACNG6/PRKX/TAB1/GADD45A/STK3/CACNG4/GRB2/NGF/PLA2G12B/FAS/PLA2G2A/FGF6/NF1/DUSP8/AKT1/ARRB1/PPP3R1/IL1R2/TNFRSF1A/FGF20/RASA1/MAP3K5/RPS6KA2/DUSP7/NTRK1/PDGFB/HSPA2/PRKACG/MAP2K3/PTPN7/CRKL/PRKCB/MAP3K11/RPS6KA3/RAC3/PPM1B/FGF…
BLANCO_MELO_COVID19_SARS_COV_2_INFECTION_A594_ACE2_EXPRESSING_CELLS_UP	BLANCO_MELO_COVID19_SARS_COV_2_INFECTION_A594_ACE2_EXPRESSING_CELLS_UP	459	0.395191	1.79344	2.61314e-09	tags=21%, list=14%, signal=19%	EGR1/FOS/DUSP1/CXCL2/TNF/IER3/CXCL8/ATF3/GDF15/IL6/CSRNP1/HES1/FOSB/MAFG/PPP1R15A/IER2/DDIT3/ZFP36/NFKBIA/CXCL1/TBC1D22B/SALL1/NFKB2/SOX9/TTC21A/GEM/DCP1A/ZNF300P1/SOCS3/SKIL/DUSP10/FOSL1/PPP4R2/TLK2/BTG2/CRY1/SPOCK2/KLF6/CCDC73/TRIM21/NPC1L1/NFIL3/ZNF143/TIPARP/KLF11/CRTC2/PNRC1/ADAM8/PROM1/IL20RB/CCL4/CCNL1/PPP1R10/CREB5/ETV3/PNN/LTB/GADD45A/KPNA5/RSRC2/NHLH1/RAB30/ZC3H12A/CCN4/TGM2/DCHS1/ZNF83…
WP_TCELL_ANTIGEN_RECEPTOR_TCR_SIGNALING_PATHWAY	WP_TCELL_ANTIGEN_RECEPTOR_TCR_SIGNALING_PATHWAY	86	0.47788	1.79295	0.000425407	tags=19%, list=10%, signal=17%	FOS/JUN/IL6/NFKBIA/MAP2K2/VAV3/SOS1/IL1B/CBL/PTK2B/LCK/PIK3R1/GAB2/IL9/GRB2/FAS
WNT_SIGNALING	WNT_SIGNALING	89	0.475051	1.79106	0.000204224	tags=39%, list=19%, signal=32%	JUN/SENP2/WIF1/CXXC4/FOSL1/PITX2/MYC/LRP5/EP300/DVL1/CSNK1G1/FRAT1/FZD5/WNT5B/DIXDC1/TLE5/RHOU/CCN4/WNT10A/PPP2CA/WNT4/CSNK1D/FBXW2/PPP2R1A/CSNK2A1/GSK3B/DKK1/CTNNBIP1/TCF7L1/RPL13A/TLE1/GAPDH/LEF1/PORCN/FBXW11
NAKAJIMA_MAST_CELL	NAKAJIMA_MAST_CELL	43	0.537781	1.7908	0.00211678	tags=33%, list=14%, signal=28%	GDF15/MT1A/MT1H/MT1E/PEBP1/ENO2/RGS10/HSP90AB1/PRG2/DUSP14/MT3/MT1F/TSPAN4/TRIB2
GHO_ATF5_TARGETS_DN	GHO_ATF5_TARGETS_DN	15	0.691984	1.79064	0.00343397	tags=20%, list=7%, signal=19%	DUSP1/ID1/TMED9
REACTOME_SMAD2_SMAD3_SMAD4_HETEROTRIMER_REGULATES_TRANSCRIPTION	REACTOME_SMAD2_SMAD3_SMAD4_HETEROTRIMER_REGULATES_TRANSCRIPTION	32	0.568519	1.78836	0.0030973	tags=28%, list=9%, signal=26%	JUNB/SMAD7/SERPINE1/MEN1/TGIF1/MYC/SMAD3/RNF111/WWTR1
HERNANDEZ_ABERRANT_MITOSIS_BY_DOCETACEL_2NM_DN	HERNANDEZ_ABERRANT_MITOSIS_BY_DOCETACEL_2NM_DN	22	0.629254	1.78805	0.00386984	tags=9%, list=0%, signal=9%	EGR1/PPP1R3F
GERY_CEBP_TARGETS	GERY_CEBP_TARGETS	123	0.452116	1.78749	0.000123665	tags=20%, list=12%, signal=17%	FOS/DUSP1/CXCL2/JUNB/ATF3/HBEGF/PPP1R15A/IER2/DDIT3/MVD/DNAJB1/LSS/BTG2/BAIAP2/RNH1/CHORDC1/BCKDHB/NGF/FHL2/HIPK1/GCH1/NUS1/APBB1IP/MAFK
GAURNIER_PSMD4_TARGETS	GAURNIER_PSMD4_TARGETS	67	0.500333	1.78701	0.000862271	tags=9%, list=1%, signal=9%	CXCL2/TNF/CXCL8/IL6/CXCL1/NFKB2
WANG_TNF_TARGETS	WANG_TNF_TARGETS	24	0.613488	1.78693	0.00454875	tags=21%, list=3%, signal=20%	JUN/GDF15/IL6/NFKBIA/LIMK1
REACTOME_TRANSCRIPTIONAL_ACTIVITY_OF_SMAD2_SMAD3_SMAD4_HETEROTRIMER	REACTOME_TRANSCRIPTIONAL_ACTIVITY_OF_SMAD2_SMAD3_SMAD4_HETEROTRIMER	43	0.536606	1.78689	0.00226906	tags=40%, list=19%, signal=32%	JUNB/SMAD7/SERPINE1/NCOR2/SKIL/MEN1/TGIF1/MYC/SMAD3/RNF111/WWTR1/TRIM33/CCNK/NCOR1/TGIF2/SMAD2/RPS27A
DACOSTA_UV_RESPONSE_VIA_ERCC3_TTD_UP	DACOSTA_UV_RESPONSE_VIA_ERCC3_TTD_UP	57	0.513128	1.78364	0.000695258	tags=33%, list=14%, signal=29%	KISS1/PPIF/BSG/EPHX1/MVD/UBA1/AAMP/MDK/CBX4/TRIM21/TLE5/PDLIM7/GALNT2/SMARCD2/GCH1/PLXNA3/PCDH9/EPOR/PLD3
BIOCARTA_RHO_PATHWAY	BIOCARTA_RHO_PATHWAY	21	0.63524	1.78349	0.00376795	tags=62%, list=22%, signal=49%	ARHGEF1/ARHGEF11/PIP5K1A/LIMK1/BAIAP2/OPHN1/PIP5K1B/PFN1/ARHGAP6/ARHGEF5/DIAPH1/ARHGAP5/PPP1R12B
REACTOME_ACTIVATION_OF_THE_AP_1_FAMILY_OF_TRANSCRIPTION_FACTORS	REACTOME_ACTIVATION_OF_THE_AP_1_FAMILY_OF_TRANSCRIPTION_FACTORS	10	0.773095	1.78323	0.0017827	tags=20%, list=0%, signal=20%	FOS/JUN
VISALA_RESPONSE_TO_HEAT_SHOCK_AND_AGING_DN	VISALA_RESPONSE_TO_HEAT_SHOCK_AND_AGING_DN	11	0.750872	1.78218	0.00198366	tags=73%, list=23%, signal=56%	STIP1/PDIA3P1/DNAJB1/SKIL/SOD1/FCGR2A/CUX1/HSPA8
WP_TRANSCRIPTION_FACTOR_REGULATION_IN_ADIPOGENESIS	WP_TRANSCRIPTION_FACTOR_REGULATION_IN_ADIPOGENESIS	21	0.634099	1.78029	0.00428321	tags=14%, list=5%, signal=14%	TNF/IL6/IRS1
PID_HDAC_CLASSI_PATHWAY	PID_HDAC_CLASSI_PATHWAY	65	0.504104	1.78027	0.0006917	tags=32%, list=17%, signal=27%	TNF/SIN3B/GATAD2B/NFKBIA/HDAC7/SMAD7/GATAD2A/NCOR2/EP300/SAP18/XPO1/MBD3/MTA2/TNFRSF1A/HDAC8/SIRT7/NCOR1/MXD1/MBD2/MBD3L2/SIRT6
REACTOME_MAPK_TARGETS_NUCLEAR_EVENTS_MEDIATED_BY_MAP_KINASES	REACTOME_MAPK_TARGETS_NUCLEAR_EVENTS_MEDIATED_BY_MAP_KINASES	31	0.572862	1.77929	0.00130183	tags=32%, list=13%, signal=28%	FOS/JUN/DUSP6/PPP2R5D/MAPK7/MEF2A/PPP2CA/PPP2R1A/RPS6KA2/DUSP7
YAO_TEMPORAL_RESPONSE_TO_PROGESTERONE_CLUSTER_1	YAO_TEMPORAL_RESPONSE_TO_PROGESTERONE_CLUSTER_1	65	0.503703	1.77886	0.000706655	tags=25%, list=10%, signal=22%	DUSP1/BHLHE40/DDIT3/GDPD3/SPSB1/NET1/FAM20C/BCL6/WNK1/MCM5/AKAP8L/ADAMDEC1/ACSS1/KCNK2/IGF1R/CFH
RADAEVA_RESPONSE_TO_IFNA1_DN	RADAEVA_RESPONSE_TO_IFNA1_DN	10	0.770663	1.77762	0.00181602	tags=50%, list=14%, signal=43%	FOS/PLEC/AP1G2/CEP170B/KMT2A
REACTOME_INTERLEUKIN_4_AND_INTERLEUKIN_13_SIGNALING	REACTOME_INTERLEUKIN_4_AND_INTERLEUKIN_13_SIGNALING	102	0.463236	1.77615	0.000441089	tags=24%, list=15%, signal=20%	FOS/TNF/CXCL8/JUNB/IL6/SOCS3/IL1B/SOCS5/PIK3R1/MYC/BCL6/HSP90AA1/BCL2/RHOU/POU2F1/S1PR1/BCL2L1/AKT1/ALOX15/OPRM1/HMOX1/MCL1/PIM1/FN1
WP_SUDDEN_INFANT_DEATH_SYNDROME_SIDS_SUSCEPTIBILITY_PATHWAYS	WP_SUDDEN_INFANT_DEATH_SYNDROME_SIDS_SUSCEPTIBILITY_PATHWAYS	151	0.434215	1.77586	7.0537e-05	tags=11%, list=5%, signal=10%	EGR1/TNF/JUN/CXCL8/BHLHE40/IL6/HES1/YWHAE/NFKB2/DEAF1/SCN5A/FOXM1/IL1B/REST/MAZ/EP300
BIOCARTA_BCR_PATHWAY	BIOCARTA_BCR_PATHWAY	32	0.56453	1.77582	0.00344442	tags=12%, list=2%, signal=12%	FOS/JUN/NFATC3/SOS1
PID_PDGFRA_PATHWAY	PID_PDGFRA_PATHWAY	21	0.631933	1.77421	0.00447644	tags=24%, list=4%, signal=23%	FOS/JUN/SOS1/SHB/PIK3R1
DUNNE_TARGETS_OF_AML1_MTG8_FUSION_DN	DUNNE_TARGETS_OF_AML1_MTG8_FUSION_DN	19	0.646918	1.77378	0.00171083	tags=32%, list=13%, signal=27%	DUSP6/ID1/ADAM12/CD34/TSPAN7/RUNX1T1
PODAR_RESPONSE_TO_ADAPHOSTIN_UP	PODAR_RESPONSE_TO_ADAPHOSTIN_UP	133	0.444195	1.77369	6.09362e-05	tags=34%, list=19%, signal=28%	DUSP1/JUN/ATF3/MAFG/PPP1R15A/DDIT3/DUSP5/SLC38A2/KLHL21/GCLM/TNFSF9/DNAJB1/TUBA1A/NLRP1/KLF6/PNRC1/CCSER2/GAB2/NFE2L1/BACH1/GADD45A/CCNG2/DDIT4/SEC24D/FNDC11/CSGALNACT2/H2BC3/MAP1LC3B/KLF2/DNAAF1/EIF2AK3/RAB9A/HMOX1/CYTIP/CD44/C16orf72/TRIB1/GOLGA2/CHAC1/MARS1/IER5/GTPBP2/ZEB1/GABARAPL1/RAP2B
PID_IL27_PATHWAY	PID_IL27_PATHWAY	21	0.631639	1.77339	0.00447644	tags=14%, list=2%, signal=14%	TNF/IL6/IL1B
BOYLAN_MULTIPLE_MYELOMA_PCA3_UP	BOYLAN_MULTIPLE_MYELOMA_PCA3_UP	76	0.483241	1.77329	0.000505638	tags=22%, list=12%, signal=20%	JUN/BHLHE40/ATF3/MT1A/SLC30A1/ISL1/MT1X/PLK2/PLA2G4A/OBSCN/RAB30/ABTB2/ATXN1/LAPTM4B/MTHFD2L/PTPDC1/CDC42BPB
GARGALOVIC_RESPONSE_TO_OXIDIZED_PHOSPHOLIPIDS_BLACK_UP	GARGALOVIC_RESPONSE_TO_OXIDIZED_PHOSPHOLIPIDS_BLACK_UP	31	0.57037	1.77155	0.00138073	tags=39%, list=11%, signal=35%	SPRY4/SRC/MOB2/ABHD4/ERRFI1/CCDC93/DUSP14/EIF1/SQLE/GCH1/AKIRIN2/KLF2
WP_FOLATE_METABOLISM	WP_FOLATE_METABOLISM	62	0.506092	1.77079	0.000654311	tags=31%, list=15%, signal=26%	TNF/IL6/SOD3/NFKB2/SERPINE1/IL1B/CSF1/SLC19A1/SCARB1/F7/FGG/RFK/F2/SLC46A1/LDLR/FGA/SOD1/FOLR3/AHCY
PID_AR_NONGENOMIC_PATHWAY	PID_AR_NONGENOMIC_PATHWAY	31	0.569825	1.76986	0.00138073	tags=29%, list=12%, signal=26%	FOS/MAP2K2/GNAI2/SRC/PIK3R1/GNAO1/GNG2/GNRH1/AKT1
ELVIDGE_HIF1A_AND_HIF2A_TARGETS_UP	ELVIDGE_HIF1A_AND_HIF2A_TARGETS_UP	34	0.554254	1.76931	0.00306585	tags=38%, list=14%, signal=33%	TOR3A/CHKA/SLC29A1/SRM/SPAG1/CORO1A/SLC35C1/GCH1/RFK/SLC5A6/CCDC86/RMC1/GABBR2
SHI_SPARC_TARGETS_UP	SHI_SPARC_TARGETS_UP	24	0.607415	1.76924	0.0056456	tags=38%, list=16%, signal=31%	PPP1R15A/DDIT3/PIK3R1/ARHGAP23/ANKRD11/ADAMTS13/PRKCB/ARHGEF5/SEMA4F
BIOCARTA_PDGF_PATHWAY	BIOCARTA_PDGF_PATHWAY	26	0.596373	1.76824	0.00375489	tags=35%, list=15%, signal=30%	FOS/JUN/SOS1/PIK3R1/GRB2/STAT5A/RASA1/CSNK2A1/PRKCB
HOLLEMAN_DAUNORUBICIN_B_ALL_UP	HOLLEMAN_DAUNORUBICIN_B_ALL_UP	10	0.766492	1.768	0.00204926	tags=40%, list=13%, signal=35%	EGR1/ATP1A1/PCDH9/LARP1
BIOCARTA_NFKB_PATHWAY	BIOCARTA_NFKB_PATHWAY	18	0.655578	1.768	0.00501252	tags=22%, list=7%, signal=21%	TNF/NFKBIA/TRADD/TAB1
WP_NEURAL_CREST_CELL_MIGRATION_IN_CANCER	WP_NEURAL_CREST_CELL_MIGRATION_IN_CANCER	40	0.537149	1.7669	0.00413204	tags=28%, list=14%, signal=24%	FOS/JUN/TRIO/PIK3R6/PAK4/EPHB2/KIDINS220/PIK3CD/AKT1/PIK3R3/PAK5
BIOCARTA_GLEEVEC_PATHWAY	BIOCARTA_GLEEVEC_PATHWAY	22	0.621341	1.76557	0.00457344	tags=41%, list=12%, signal=36%	FOS/JUN/SOS1/PIK3R1/MYC/STAT5B/GRB2/STAT5A/AKT1
PID_IL1_PATHWAY	PID_IL1_PATHWAY	30	0.573166	1.76517	0.00352567	tags=23%, list=7%, signal=22%	JUN/MAP3K3/IL1B/PIK3R1/TOLLIP/ERC1/TAB1
NEMETH_INFLAMMATORY_RESPONSE_LPS_UP	NEMETH_INFLAMMATORY_RESPONSE_LPS_UP	77	0.479699	1.76517	0.000440397	tags=23%, list=12%, signal=21%	TNF/IER3/ATF3/IER2/NFKBIA/FURIN/TNFSF9/MT1X/MARCKSL1/MSR1/PIP5K1B/LTB/EIF1/BCL2L1/ADAR/GCH1/MYADM/APBB1IP
BARRIER_CANCER_RELAPSE_NORMAL_SAMPLE_DN	BARRIER_CANCER_RELAPSE_NORMAL_SAMPLE_DN	31	0.567753	1.76342	0.0014754	tags=35%, list=9%, signal=32%	JUN/PPP1R15A/AKAP17A/TMEM94/N4BP2L2/CNPY3/SUPT5H/NFE2L1/RHOT2/TBC1D2B/SPTAN1
BIOCARTA_SPRY_PATHWAY	BIOCARTA_SPRY_PATHWAY	17	0.664992	1.76334	0.00567061	tags=47%, list=13%, signal=41%	SPRY4/SPRY1/SPRY2/SOS1/CBL/PTPRB/GRB2/RASA1
WP_NRF2_PATHWAY	WP_NRF2_PATHWAY	132	0.441211	1.76185	0.000111366	tags=23%, list=14%, signal=20%	EGR1/HBEGF/MAFG/GSTM1/SOD3/EPHA2/GCLM/SRXN1/DNAJB1/ABCC5/G6PD/GSTM4/ADH7/GGTLC2/HSP90AA1/HSP90AB1/KEAP1/GGT1/SLC5A10/UGT1A4/SLC6A8/GSTM2/SLC5A3/GSTA3/CES5A/RXRA/SLC5A6/SLC39A7/PDGFB/SLC39A5/HMOX1
NAKAJIMA_EOSINOPHIL	NAKAJIMA_EOSINOPHIL	25	0.598784	1.76079	0.00547838	tags=36%, list=16%, signal=30%	HES1/SMAD7/SLC29A1/MARCKSL1/CCL4/ALOX15/CAMK1/TFF3/PTGDR2
WP_GLUCOCORTICOID_RECEPTOR_PATHWAY	WP_GLUCOCORTICOID_RECEPTOR_PATHWAY	65	0.498427	1.76022	0.000864204	tags=32%, list=17%, signal=27%	JUN/BHLHE40/NAV3/SPRY1/AKAP13/NFKB2/PLK2/HSP90AA1/MGAM/SERTAD2/SEC14L1/RXRA/ETNK2/TSC22D3/EPB41L4B/ARL5B/BIRC3/NR1I3/ZIC2/CUL1/SLC19A2
BIOCARTA_TNFR2_PATHWAY	BIOCARTA_TNFR2_PATHWAY	15	0.680219	1.7602	0.00465347	tags=27%, list=8%, signal=25%	DUSP1/NFKBIA/TRAF2/TRAF3
PID_LKB1_PATHWAY	PID_LKB1_PATHWAY	46	0.525687	1.75853	0.00148239	tags=39%, list=16%, signal=33%	YWHAE/SIK1/TSC1/SFN/MYC/AKT1S1/CRTC2/HSP90AA1/ETV4/CAB39/STRADA/TSC2/PSEN2/STK11/GSK3B/PRKAG1/BRSK2/YWHAZ
ZHANG_ADIPOGENESIS_BY_BMP7	ZHANG_ADIPOGENESIS_BY_BMP7	14	0.690187	1.75541	0.00536035	tags=50%, list=13%, signal=44%	SH2B2/PIK3C2A/PIK3R1/IRS1/GRB2/AKT1/MAP3K5
BIOCARTA_RELA_PATHWAY	BIOCARTA_RELA_PATHWAY	12	0.7219	1.75539	0.00341716	tags=33%, list=7%, signal=31%	TNF/NFKBIA/EP300/TRADD
LEE_NEURAL_CREST_STEM_CELL_DN	LEE_NEURAL_CREST_STEM_CELL_DN	116	0.446089	1.75526	0.000332251	tags=16%, list=7%, signal=15%	FOS/DUSP6/GDF15/NAV3/NUAK2/SPRY1/SPRY2/EPHA2/WIF1/PLK2/SYNE2/GAS6/FZD5/WNT5B/BCL2/PROM1/SMS/CREB5
PID_IL8_CXCR2_PATHWAY	PID_IL8_CXCR2_PATHWAY	32	0.557742	1.75446	0.00407641	tags=34%, list=15%, signal=29%	CXCL8/GNAI2/PIK3R6/CBL/ARRB2/PPP2CA/GNG2/AKT1/PPP2R1A/ARRB1/PRKCB
BHAT_ESR1_TARGETS_NOT_VIA_AKT1_UP	BHAT_ESR1_TARGETS_NOT_VIA_AKT1_UP	198	0.417057	1.75445	3.14372e-05	tags=26%, list=14%, signal=22%	BHLHE40/SIN3B/LETM1/SH2B2/CBFA2T3/ACIN1/FAM102A/SLC29A1/FLNB/TMEM104/NCOR2/SVIL/KDM4B/TRIM47/SRM/B4GALT1/ZNF703/SHB/IGFBP4/POP1/UHRF1/SMOX/PGBD5/TIPARP/TMEM51/IER5L/GAB2/PRR5/LONRF2/PIP4K2A/RAPGEFL1/MAG/RPUSD1/KHK/CYP4F11/LMO1/ACSS1/TGM2/AHCTF1/DHRS2/TFF2/FHL2/SLC22A5/ADCY9/OLFML3/PTGES/GPRIN1/MYBBP1A/SMTNL2/HK2/KAZN
BEGUM_TARGETS_OF_PAX3_FOXO1_FUSION_DN	BEGUM_TARGETS_OF_PAX3_FOXO1_FUSION_DN	45	0.522325	1.7527	0.00204909	tags=42%, list=13%, signal=37%	EPHA2/KLF10/SOX9/SERPINE1/FLNB/JAG2/DGKD/CPEB1/BMP1/ID1/MYC/TNC/EPHB2/ITGA3/BCL2L1/CD70/KCNG1/RREB1/AJAP1
WP_HYPERTROPHY_MODEL	WP_HYPERTROPHY_MODEL	18	0.649599	1.75188	0.00590646	tags=22%, list=6%, signal=21%	ATF3/HBEGF/CCN1/DUSP14
WP_EPO_RECEPTOR_SIGNALING	WP_EPO_RECEPTOR_SIGNALING	25	0.595665	1.75162	0.00611912	tags=40%, list=13%, signal=35%	MAP2K2/SOS1/SRC/IRS1/STAT5B/GRB2/STAT5A/AKT1/RASA1/EPOR
SHEDDEN_LUNG_CANCER_GOOD_SURVIVAL_A5	SHEDDEN_LUNG_CANCER_GOOD_SURVIVAL_A5	66	0.492587	1.74978	0.000704889	tags=33%, list=15%, signal=28%	SIN3B/ADGRL1/ARID3A/FBRS/SLC29A1/DNAJB1/KDM4B/DCAF15/PLPPR2/CHERP/RIPK4/DHRS2/RANBP3/ZNF444/RTN2/PKP4/EPOR/XAB2/KLHL26/HAUS5/ZSCAN18/SEZ6L2
MARSHALL_VIRAL_INFECTION_RESPONSE_DN	MARSHALL_VIRAL_INFECTION_RESPONSE_DN	30	0.567138	1.7466	0.00403386	tags=43%, list=17%, signal=36%	NFKBIA/TGIF1/LY6H/KIF23/STAT5B/PDLIM1/NFKBIB/TOB1/KLF2/ITGB7/PIM1/DTX1/KLRG1
MAGRANGEAS_MULTIPLE_MYELOMA_IGLL_VS_IGLK_DN	MAGRANGEAS_MULTIPLE_MYELOMA_IGLL_VS_IGLK_DN	22	0.614497	1.74612	0.00514911	tags=50%, list=16%, signal=42%	DUSP1/GAS2L1/PRKD2/RHOG/LTBP4/NECTIN2/SCN1B/ALG8/LTA/CDSN/AXL
DORSAM_HOXA9_TARGETS_DN	DORSAM_HOXA9_TARGETS_DN	29	0.57546	1.74608	0.0052396	tags=14%, list=4%, signal=13%	JUN/JUNB/SDC4/MYC
KEGG_B_CELL_RECEPTOR_SIGNALING_PATHWAY	KEGG_B_CELL_RECEPTOR_SIGNALING_PATHWAY	68	0.489137	1.74546	0.00136402	tags=25%, list=13%, signal=22%	FOS/JUN/NFKBIA/MAP2K2/VAV3/NFATC3/SOS1/VAV2/PIK3R1/CD22/PIK3CD/GRB2/NFKBIB/AKT1/PPP3R1/PIK3R3/GSK3B
TAGHAVI_NEOPLASTIC_TRANSFORMATION	TAGHAVI_NEOPLASTIC_TRANSFORMATION	11	0.735356	1.74535	0.00329514	tags=45%, list=14%, signal=39%	FOSB/AGRN/MAP3K3/MCF2L/PDGFB
BIOCARTA_TCR_PATHWAY	BIOCARTA_TCR_PATHWAY	42	0.528404	1.74515	0.00339803	tags=17%, list=4%, signal=16%	FOS/JUN/NFKBIA/NFATC3/SOS1/LCK/PIK3R1
AMIT_EGF_RESPONSE_20_HELA	AMIT_EGF_RESPONSE_20_HELA	10	0.756249	1.74438	0.00261571	tags=40%, list=3%, signal=39%	FOS/JUN/PPP1R15A/BTG2
PID_S1P_S1P2_PATHWAY	PID_S1P_S1P2_PATHWAY	24	0.598414	1.74303	0.00693792	tags=17%, list=5%, signal=16%	FOS/JUN/GNAI2/IRS1
PID_ERBB2_ERBB3_PATHWAY	PID_ERBB2_ERBB3_PATHWAY	43	0.523399	1.74291	0.00339747	tags=26%, list=13%, signal=22%	FOS/JUN/MAP2K2/SOS1/SRC/PIK3R1/PIK3CD/GRB2/RNF41/AKT1/PIK3R3
PID_EPO_PATHWAY	PID_EPO_PATHWAY	33	0.549178	1.74167	0.00367839	tags=42%, list=17%, signal=35%	SOS1/SOCS3/VAV2/CBL/PIK3R1/BCL2/STAT5B/GAB1/BCL2L1/GRB2/STAT5A/EPOR/CRKL/MAPK14
BLANCO_MELO_MERS_COV_INFECTION_MCR5_CELLS_UP	BLANCO_MELO_MERS_COV_INFECTION_MCR5_CELLS_UP	268	0.401955	1.74137	2.59269e-06	tags=20%, list=14%, signal=18%	FOS/DUSP1/JUN/BHLHE40/HBEGF/CSRNP1/PPP1R15A/UCP3/NFKBIA/SLC25A25/NAA16/CGAS/KLF10/ADORA2A/DNAJB1/NFATC3/SPOCK2/PMS2CL/FAM90A1/UBE2MP1/COL26A1/NIM1K/MYO5B/NEB/SCN1A/DYRK2/NHLH1/DNHD1/C19orf18/AVIL/ZC3H12A/CCDC117/ABTB2/TYW1B/TRARG1/ADAM32/FBLL1/DHDH/SSUH2/ITGB7/C9orf24/DUSP8/SLC22A20P/GRHL1/VHLL/ARTN/DEDD2/PSMD6-AS2/TMPRSS9/EPPK1/PYGM/CTAGE1/SPDYA/MXD1
ONO_FOXP3_TARGETS_UP	ONO_FOXP3_TARGETS_UP	23	0.604695	1.74082	0.00986892	tags=9%, list=0%, signal=9%	FOS/JUN
WP_SEROTONIN_RECEPTOR_467_AND_NR3C_SIGNALING	WP_SEROTONIN_RECEPTOR_467_AND_NR3C_SIGNALING	18	0.645386	1.74051	0.00641729	tags=17%, list=2%, signal=16%	EGR1/MAP2K2/ELK4
BURTON_ADIPOGENESIS_1	BURTON_ADIPOGENESIS_1	31	0.56025	1.74012	0.00185536	tags=23%, list=6%, signal=21%	IER3/IL6/SLC25A25/PHLDA1/NFIL3/ERRFI1/UNC45A
BIOCARTA_GPCR_PATHWAY	BIOCARTA_GPCR_PATHWAY	29	0.573361	1.73971	0.00543486	tags=31%, list=15%, signal=26%	FOS/JUN/NFATC3/CALM1/PRKAR1B/PRKACG/PRKCB/RPS6KA3/ADCY1
DORN_ADENOVIRUS_INFECTION_12HR_DN	DORN_ADENOVIRUS_INFECTION_12HR_DN	33	0.547658	1.73684	0.0041814	tags=33%, list=15%, signal=28%	IER3/IL6/NFKBIA/MYC/FHL2/EFNA1/H1-0/CCNK/MCL1/MAP2K3/SH3BP5
BIOCARTA_TEL_PATHWAY	BIOCARTA_TEL_PATHWAY	16	0.664401	1.73667	0.00575459	tags=50%, list=12%, signal=44%	MYC/HSP90AA1/BCL2/TERT/IGF1R/PPP2CA/AKT1/TERF1
PID_PDGFRB_PATHWAY	PID_PDGFRB_PATHWAY	123	0.439225	1.73652	0.000303404	tags=26%, list=13%, signal=23%	FOS/JUN/YWHAE/ARHGDIA/MAP2K2/SOS1/SFN/SRC/PIK3R6/VAV2/SIPA1/MAP2K7/CBL/LCK/CTTN/PIK3R1/DNM2/MYC/PLA2G4A/BAIAP2/STAT5B/GAB1/S1PR1/PIK3CD/GRB2/PPP2CA/STAT5A/PAG1/WASF2/PPP2R1A/PIK3R3/RASA1
PETROVA_ENDOTHELIUM_LYMPHATIC_VS_BLOOD_DN	PETROVA_ENDOTHELIUM_LYMPHATIC_VS_BLOOD_DN	158	0.421694	1.73648	0.000136396	tags=21%, list=11%, signal=19%	IER3/JUN/CXCL8/IL6/AGRN/KLHL21/CXCL1/MT1A/MMP14/SERPINE1/MT1H/ATP1B1/MT1X/PLTP/MT1E/EMP3/BTG2/ENO2/PLA2G4A/RGS10/SMAD3/ADGRG6/SGSH/MBOAT7/TPM2/GADD45A/IL32/TGM2/SLC6A8/MT3/FHL2/MT1F/COL6A1
PID_P38_MKK3_6PATHWAY	PID_P38_MKK3_6PATHWAY	26	0.585369	1.73561	0.00529532	tags=42%, list=18%, signal=35%	ATM/MAP3K3/TAOK2/TRAF2/MAP3K4/TAB1/GADD45A/MAP3K5/MAP2K3/MAPK14/TAOK1
JEPSEN_SMRT_TARGETS	JEPSEN_SMRT_TARGETS	32	0.551636	1.73526	0.0047716	tags=16%, list=4%, signal=15%	EGR1/SPRY4/HMGA1/SRXN1/SYT12
HOLLEMAN_ASPARAGINASE_RESISTANCE_B_ALL_DN	HOLLEMAN_ASPARAGINASE_RESISTANCE_B_ALL_DN	12	0.713311	1.7345	0.00406803	tags=50%, list=8%, signal=46%	UBE2Z/ARRB2/ZNF318/CCNG2/F8A1/JUP
PID_HDAC_CLASSII_PATHWAY	PID_HDAC_CLASSII_PATHWAY	32	0.551355	1.73437	0.0048348	tags=28%, list=12%, signal=25%	HDAC7/YWHAE/NCOR2/BCL6/HSP90AA1/RFXANK/CAMK4/XPO1/GNG2
BIOCARTA_PYK2_PATHWAY	BIOCARTA_PYK2_PATHWAY	27	0.579054	1.73352	0.00715985	tags=52%, list=23%, signal=40%	JUN/MAP2K2/SOS1/PTK2B/CALM1/GRB2/MAP2K3/CRKL/PRKCB/BCAR1/MAPK14/MAPK1/SHC1/CALM2
SCHLOSSER_MYC_AND_SERUM_RESPONSE_SYNERGY	SCHLOSSER_MYC_AND_SERUM_RESPONSE_SYNERGY	30	0.562862	1.73344	0.00447853	tags=27%, list=3%, signal=26%	SMG7/TAGLN2/PYCR1/MTA1/SRM/RNF126/SGTA/NME4
BIOCARTA_TOLL_PATHWAY	BIOCARTA_TOLL_PATHWAY	23	0.602016	1.73311	0.0105139	tags=22%, list=7%, signal=20%	FOS/JUN/NFKBIA/PPARA/TAB1
TENEDINI_MEGAKARYOCYTE_MARKERS	TENEDINI_MEGAKARYOCYTE_MARKERS	58	0.496125	1.7318	0.00112577	tags=16%, list=5%, signal=15%	FOS/CXCL8/IL6/MAFG/CXCL1/CBFA2T3/IL1B/MYC/BCL2
BIOCARTA_P53_PATHWAY	BIOCARTA_P53_PATHWAY	15	0.669088	1.73139	0.00587299	tags=33%, list=8%, signal=31%	BAX/APAF1/ATM/BCL2/GADD45A
ZHAN_V1_LATE_DIFFERENTIATION_GENES_DN	ZHAN_V1_LATE_DIFFERENTIATION_GENES_DN	15	0.669027	1.73124	0.00587299	tags=33%, list=15%, signal=29%	ADM/HMGA1/SNRPB/ANP32B/PTPN7
REACTOME_DOWNREGULATION_OF_TGF_BETA_RECEPTOR_SIGNALING	REACTOME_DOWNREGULATION_OF_TGF_BETA_RECEPTOR_SIGNALING	25	0.588548	1.73069	0.00727624	tags=28%, list=8%, signal=26%	PPP1R15A/SMAD7/PMEPA1/PPP1CA/SMAD3/STUB1/XPO1
SHIN_B_CELL_LYMPHOMA_CLUSTER_5	SHIN_B_CELL_LYMPHOMA_CLUSTER_5	17	0.652486	1.73018	0.00740502	tags=24%, list=4%, signal=23%	TNF/IL6/SOCS3/LY6H
LEE_LIVER_CANCER_HEPATOBLAST	LEE_LIVER_CANCER_HEPATOBLAST	16	0.661756	1.72976	0.00614037	tags=19%, list=5%, signal=18%	FOS/IL6/TNC
KORKOLA_TERATOMA	KORKOLA_TERATOMA	41	0.521284	1.72821	0.00622361	tags=15%, list=6%, signal=14%	EGR1/JUN/ZFP36/LIN28A/FEN1/MCM5
PID_CIRCADIAN_PATHWAY	PID_CIRCADIAN_PATHWAY	16	0.660721	1.72705	0.00633326	tags=25%, list=3%, signal=24%	BHLHE40/CSNK1E/WDR5/CRY1
MARSON_FOXP3_CORE_DIRECT_TARGETS	MARSON_FOXP3_CORE_DIRECT_TARGETS	19	0.62976	1.72673	0.00299785	tags=26%, list=4%, signal=25%	DUSP6/UCP2/TGIF1/LY6H/MYC
PHONG_TNF_RESPONSE_NOT_VIA_P38	PHONG_TNF_RESPONSE_NOT_VIA_P38	324	0.390985	1.72578	2.02131e-06	tags=23%, list=12%, signal=21%	JUN/BHLHE40/SLCO4A1/HES1/IER2/PPIF/NFKBIA/SLCO3A1/ETV1/EPHA2/RNF19B/CLIP2/TRIO/NFKB2/SOX9/SERPINE1/MVD/DNAJB1/GRINA/GEM/SLC30A1/MAP3K3/ATP1B1/SAMD4A/HYOU1/PDE10A/SHB/COL6A2/TUT4/CSF1/CADM1/KLF6/SDC4/TRIM21/RGS3/HLA-A/MYH9/SMOX/NET1/MPHOSPH10/SMAD3/FZD5/TMEM132A/SBNO2/PEG10/NFE2L1/ANKLE2/CYP1A1/LTB/TNFAIP8/TRAF3/PPME1/GADD45A/OGFR/TNFRSF10B/PIK3CD/IFNAR2/DHRS2/IRF2/ABTB2/BCL3/SERTAD2/GCH1/FSTL3/CD…
SMIRNOV_RESPONSE_TO_IR_6HR_UP	SMIRNOV_RESPONSE_TO_IR_6HR_UP	159	0.419403	1.72554	9.20273e-05	tags=25%, list=11%, signal=22%	IER3/ATF3/GDF15/DDIT3/ASTN2/APAF1/RNF19B/RETSAT/TNFSF9/MLF2/PPM1D/SLC30A1/MT1H/MT1X/FOSL1/BTG2/CSF1/PIDD1/PLK2/SAC3D1/MICALL1/CCSER2/DUSP14/LIG1/ANO3/GADD45A/TNFRSF10B/MAD1L1/GLS2/FHL2/FAS/GCH1/CLP1/TOB1/MT1F/RXRA/JADE3/FAM169A/CD70
QI_HYPOXIA	QI_HYPOXIA	130	0.434599	1.72442	0.000219577	tags=27%, list=15%, signal=23%	DUSP1/IER3/BHLHE40/ADM/SERTAD1/SOX9/TNFSF9/DYRK1B/MVD/KDM4B/JMJD6/LSS/MT1X/RNF126/NDRG2/DIXDC1/ATG9B/AK4/CCNG2/DDIT4/SQLE/GLS2/KCNK2/GCH1/EFNA1/COL12A1/PFKL/HK2/HMOX1/CD109/HK1/VHL/ITPK1/PCYT1B/CTNS
WP_HEPATITIS_B_INFECTION	WP_HEPATITIS_B_INFECTION	142	0.425275	1.72378	0.000161912	tags=28%, list=17%, signal=24%	FOS/TNF/JUN/CXCL8/IL6/BAX/APAF1/MAP2K2/NFATC3/SOS1/SRC/MAP2K7/PTK2B/PIK3R1/MYC/EP300/SMAD3/ATF6B/BCL2/CREB5/STAT5B/TAB1/TRAF3/PIK3CD/GRB2/FAS/STAT5A/AKT1/PIK3R3/DDB1/MAP2K3/CASP12/PRKCB/CREB3L4/IFNA21/IRAK1/YWHAZ/DDX58/CASP9/MAPK14
WP_NEURAL_CREST_CELL_MIGRATION_DURING_DEVELOPMENT	WP_NEURAL_CREST_CELL_MIGRATION_DURING_DEVELOPMENT	37	0.536549	1.72371	0.00572937	tags=27%, list=14%, signal=23%	FOS/JUN/TRIO/PIK3R6/PAK4/EPHB2/PIK3CD/AKT1/PIK3R3/PAK5
PID_PS1_PATHWAY	PID_PS1_PATHWAY	46	0.514866	1.72233	0.00236826	tags=35%, list=16%, signal=29%	FOS/JUN/WIF1/PPP2R5D/KREMEN2/MYC/DVL1/FRAT1/TLE5/TAB1/CSNK2A1/GSK3B/DKK1/DKK2/TLE1/DTX1
WP_THYMIC_STROMAL_LYMPHOPOIETIN_TSLP_SIGNALING_PATHWAY	WP_THYMIC_STROMAL_LYMPHOPOIETIN_TSLP_SIGNALING_PATHWAY	45	0.51285	1.72091	0.00286872	tags=22%, list=7%, signal=21%	CXCL8/IL6/NFKBIA/MAP2K2/NFKB2/SRC/LCK/MYC/GAB2/STAT5B
PID_RXR_VDR_PATHWAY	PID_RXR_VDR_PATHWAY	24	0.590703	1.72057	0.0087534	tags=25%, list=6%, signal=24%	TNF/NCOR2/NCOA1/PPARA/BCL2/SREBF1
REACTOME_PRE_NOTCH_PROCESSING_IN_GOLGI	REACTOME_PRE_NOTCH_PROCESSING_IN_GOLGI	15	0.664055	1.71837	0.00632228	tags=40%, list=8%, signal=37%	ATP2A2/FURIN/ST3GAL4/B4GALT1/ST3GAL6/ATP2A3
MCMURRAY_TP53_HRAS_COOPERATION_RESPONSE_UP	MCMURRAY_TP53_HRAS_COOPERATION_RESPONSE_UP	26	0.579275	1.71754	0.00612973	tags=27%, list=6%, signal=25%	CXCL2/HBEGF/SOD3/HMGA1/PARVB/CADM1/SMS
REACTOME_ACTIVATION_OF_MATRIX_METALLOPROTEINASES	REACTOME_ACTIVATION_OF_MATRIX_METALLOPROTEINASES	29	0.565925	1.71715	0.00641117	tags=21%, list=7%, signal=19%	CTRB2/FURIN/MMP14/MMP24/MMP17/CTSK
PID_NFKAPPAB_ATYPICAL_PATHWAY	PID_NFKAPPAB_ATYPICAL_PATHWAY	17	0.647341	1.71654	0.00830648	tags=71%, list=25%, signal=53%	NFKBIA/SRC/LCK/PIK3R1/ARRB2/BCL3/CSNK2A1/MAPK14/CSNK2A2/CSNK2B/PIK3CA/IKBKB
WP_TYPE_I_INTERFERON_INDUCTION_AND_SIGNALING_DURING_SARSCOV2_INFECTION	WP_TYPE_I_INTERFERON_INDUCTION_AND_SIGNALING_DURING_SARSCOV2_INFECTION	25	0.58246	1.71279	0.00830648	tags=12%, list=0%, signal=12%	FOS/JUN/NFKBIA
BIOCARTA_STEM_PATHWAY	BIOCARTA_STEM_PATHWAY	14	0.673208	1.71222	0.00855365	tags=36%, list=9%, signal=32%	CXCL8/IL6/CSF1/IL9/IL3
HALMOS_CEBPA_TARGETS_DN	HALMOS_CEBPA_TARGETS_DN	41	0.516098	1.71102	0.00745597	tags=29%, list=8%, signal=27%	HES1/CCN1/SMAD7/GRB7/CHKA/TRIO/RBPMS/DUSP10/GAS2L1/RGS3/DYRK2/GADD45A
PID_TCR_RAS_PATHWAY	PID_TCR_RAS_PATHWAY	14	0.672286	1.70988	0.00881483	tags=7%, list=0%, signal=7%	FOS
ZHOU_INFLAMMATORY_RESPONSE_LIVE_UP	ZHOU_INFLAMMATORY_RESPONSE_LIVE_UP	406	0.379483	1.70955	8.13492e-07	tags=19%, list=13%, signal=17%	DUSP1/CXCL2/TNF/IER3/IL6/ADM/PPP1R15A/DUSP5/NFKBIA/SLCO3A1/SOD3/CGAS/CXCL1/NFKB2/MIIP/TNFSF9/TNP1/SERPINE1/SPSB1/NCOR2/SVIL/CLCF1/EDN1/KLC2/PKM/SRC/B4GALT1/ATP1B1/IL1B/LSS/FOSL1/SMTN/ARMC5/BTG2/EYA4/DYNC1H1/KLF6/SDC4/TLNRD1/KCNAB1/TMC6/PNRC1/COL26A1/CCL4/ACOT6/DEFB108B/PIM3/CREB5/KIF1B/ARHGAP31/GPC1/ANKLE2/ITPRIP/EIF5/TTC9/DNHD1/PSD3/KANK1/KLHL4/ZC3H12A/GRIN2A/NIPAL4/ATXN1/STAT5A/DTX2/FNDC3B/PCDH…
ONDER_CDH1_TARGETS_1_DN	ONDER_CDH1_TARGETS_1_DN	156	0.415633	1.70918	0.000332006	tags=17%, list=9%, signal=15%	CXCL2/CXCL8/DUSP6/HBEGF/NAV3/ADAMTS1/SLC43A3/KLF10/CXCL1/HNRNPM/SOX9/EDN1/IL1B/MCM4/FOSL1/POP1/SPAG1/CBFB/DNAJA1/FEN1/EIF4G1/TP63/EIF5/ARHGAP25/FBXO9/CALM1
WP_MAPK_SIGNALING_PATHWAY	WP_MAPK_SIGNALING_PATHWAY	232	0.398932	1.70841	1.81872e-05	tags=25%, list=16%, signal=21%	FOS/DUSP1/TNF/JUN/DUSP6/DDIT3/MAP2K2/NFKB2/FLNB/NFATC3/SOS1/IL1B/MAP2K7/ELK4/DUSP10/MAPK8IP3/TAOK2/TRAF2/MAPK7/MAP2K5/MYC/PLA2G4A/ARRB2/MAP3K4/CACNA1I/CACNG6/TAB1/GADD45A/STK3/CACNG4/GRB2/NGF/FAS/FGF6/NF1/DUSP8/AKT1/ARRB1/PPP3R1/IL1R2/TNFRSF1A/FGF20/RASA1/MAP3K5/DUSP7/NTRK1/PDGFB/HSPA2/PRKACG/MAP2K3/PTPN7/CRKL/MAP3K11/RPS6KA3/RAC3/PPM1B/FGFR4
BIOCARTA_P53HYPOXIA_PATHWAY	BIOCARTA_P53HYPOXIA_PATHWAY	20	0.614707	1.70757	0.00819188	tags=45%, list=12%, signal=40%	BAX/ATM/DNAJB1/EP300/HSP90AA1/GADD45A/FHL2/NFKBIB/AKT1
SCHEIDEREIT_IKK_TARGETS	SCHEIDEREIT_IKK_TARGETS	17	0.643645	1.70674	0.00895038	tags=29%, list=10%, signal=26%	NFKBIA/NFKB2/NCOR2/IRS1/NFKBIB
PID_GMCSF_PATHWAY	PID_GMCSF_PATHWAY	36	0.529495	1.70599	0.00530419	tags=53%, list=27%, signal=38%	FOS/MAP2K2/SOS1/PIK3R1/GAB2/STAT5B/GRB2/STAT5A/PRKACG/PIM1/YWHAZ/OSM/MAPK1/SHC1/PIK3CA/CSF2RA/IKBKB/STAT3/RAF1
WP_GASTRIN_SIGNALING_PATHWAY	WP_GASTRIN_SIGNALING_PATHWAY	111	0.438566	1.70572	0.000673062	tags=23%, list=15%, signal=20%	EGR1/FOS/JUN/CXCL8/NFKBIA/HDAC7/SERPINE1/SOS1/SRC/PIK3R1/MYC/IRS1/ARRB2/PRKD2/PRKCH/BCL2L1/GRB2/TFF2/AKT1/ARRB1/PIK3R3/GSK3B/BIRC3/MAP3K11/CD44/BCAR1
FRIDMAN_SENESCENCE_DN	FRIDMAN_SENESCENCE_DN	11	0.717968	1.70408	0.00550256	tags=36%, list=9%, signal=33%	EGR1/COL3A1/ID1/CCN4
BROWNE_HCMV_INFECTION_12HR_UP	BROWNE_HCMV_INFECTION_12HR_UP	104	0.442949	1.703	0.000768798	tags=30%, list=17%, signal=25%	CXCL8/RBM38/SF1/RNF19B/SALL1/STIP1/MMP14/RNF40/TRIM21/FEN1/PITX2/ARRB2/TESK2/WDR82/CYTH1/DFFB/SLC6A8/AHCTF1/PIM2/TDG/POLR2C/TERF1/CCDC86/PLAGL2/IGFBP2/TLE3/MFAP3L/NEFH/CFDP1/PML/KIAA0895
BROCKE_APOPTOSIS_REVERSED_BY_IL6	BROCKE_APOPTOSIS_REVERSED_BY_IL6	140	0.420823	1.70278	0.000445273	tags=22%, list=9%, signal=20%	JUN/JUNB/BHLHE40/HBEGF/IER2/ZFP36/DUSP5/SF1/TMEM184B/SIK1/MT1H/SOCS3/MT1X/ID1/SREK1IP1/MAZ/TGIF1/RAD1/DOHH/BCL6/ARFGAP3/GAS6/SBNO2/ST3GAL6/EIF5/GADD45A/EVI2B/PTP4A3/ATP2B4/GRB2/BCL3
SMITH_TERT_TARGETS_UP	SMITH_TERT_TARGETS_UP	139	0.421117	1.7013	0.000301582	tags=24%, list=13%, signal=21%	DUSP1/CXCL2/ATF3/PRRC2A/ZFP36/EPHA2/SMAD7/ATXN2L/GFPT1/PYCR1/ALKBH1/HYOU1/DDX10/G6PD/UBE2S/TGIF1/NFIL3/TNC/LHFPL2/ADAM8/EPCAM/KDM5C/HNRNPD/LMO4/STK3/WASF1/PPP2CA/HSF2/SH3BGR/PPP2R2A/R3HDM1/ELF4/SLC39A7/NEK3
WP_PHYSIOLOGICAL_AND_PATHOLOGICAL_HYPERTROPHY_OF_THE_HEART	WP_PHYSIOLOGICAL_AND_PATHOLOGICAL_HYPERTROPHY_OF_THE_HEART	24	0.583521	1.69964	0.0105689	tags=12%, list=2%, signal=12%	FOS/JUN/EDN1
SOUCEK_MYC_TARGETS	SOUCEK_MYC_TARGETS	11	0.715839	1.69903	0.00570025	tags=18%, list=4%, signal=18%	CXCL2/KLF6
REACTOME_ESTROGEN_DEPENDENT_GENE_EXPRESSION	REACTOME_ESTROGEN_DEPENDENT_GENE_EXPRESSION	135	0.42325	1.69778	0.000654139	tags=26%, list=17%, signal=22%	FOS/JUN/FOSB/KDM4B/NCOA1/USF2/H2BC11/SMC1A/CBFB/GTF2F2/MYC/EP300/HSP90AA1/BCL2/HSP90AB1/SMC3/POU2F1/H2BC14/KANK1/POLR2J/H2AX/PRMT1/H2BC3/FOXA1/TNRC6C/POLR2C/H2BC17/POLR2B/POLR2A/H3C1/AGO4/TLE3/TFF3/H4C1/TNRC6A
DACOSTA_UV_RESPONSE_VIA_ERCC3_UP	DACOSTA_UV_RESPONSE_VIA_ERCC3_UP	298	0.389336	1.69759	7.90423e-06	tags=26%, list=15%, signal=23%	JUNB/ATF3/PPIF/RBM38/C2CD2L/SULT1A2/BSG/EPHX1/TNFSF9/CLCN2/LY6E/MVD/GRINA/NXF1/UBA1/NCDN/TERF2/AAMP/MDK/MCM4/PLTP/FKBP1A/PPP2R5D/PSMC3IP/BTG2/CBX4/TSPYL2/SAC3D1/MAZ/RNF40/TRIM21/HLA-A/PPP1CA/FEN1/PITX2/SIGMAR1/PKMYT1/ARRB2/GLUL/PNRC1/TRIM13/SERPINH1/MCM5/LMF2/NFE2L1/NOP2/PDLIM7/MBOAT7/TPM2/DMPK/OGFR/CCNG2/SAP18/GALNT2/SLC6A8/PQBP1/GCH1/PIM2/CLK3/CDC34/TOB1/GAS1/TEX30/PLXNA3/EFNA1/PCDH9/ICAM3/NCBP…
HELLEBREKERS_SILENCED_DURING_TUMOR_ANGIOGENESIS	HELLEBREKERS_SILENCED_DURING_TUMOR_ANGIOGENESIS	74	0.464421	1.69593	0.00150155	tags=23%, list=12%, signal=20%	IER3/CXCL8/IL6/ADM/CXCL1/UCP2/SMTN/CADM1/SDC4/NPPB/GADD45A/ITGA3/IL32/HLA-C/COL6A1/OLFML3/FAT1
WANG_ESOPHAGUS_CANCER_VS_NORMAL_UP	WANG_ESOPHAGUS_CANCER_VS_NORMAL_UP	113	0.435149	1.69587	0.000504871	tags=21%, list=11%, signal=19%	JUN/DUSP6/ATF3/FOSB/PNPLA2/TAF15/UCP2/SERPINE1/COL3A1/SOCS3/SMTN/PMEPA1/SDC4/RGS3/HLA-A/COL9A2/PROM1/CCL4/CD34/EIF1/SERPING1/PIM2/MYADM/C4A
BIOCARTA_STRESS_PATHWAY	BIOCARTA_STRESS_PATHWAY	22	0.59634	1.69453	0.0084207	tags=23%, list=7%, signal=21%	TNF/JUN/NFKBIA/TRAF2/TRADD
ABRAMSON_INTERACT_WITH_AIRE	ABRAMSON_INTERACT_WITH_AIRE	42	0.512841	1.69375	0.00695494	tags=40%, list=14%, signal=35%	TRIM28/IPO7/C1QBP/SMC1A/SNRPB/MCM5/MCM2/SMC3/XPO1/SRSF1/NOP56/MYBBP1A/H2BC17/DDX17/POLR2B/LMNB1/POLR2A
PEPPER_CHRONIC_LYMPHOCYTIC_LEUKEMIA_UP	PEPPER_CHRONIC_LYMPHOCYTIC_LEUKEMIA_UP	30	0.54973	1.69299	0.00606664	tags=37%, list=20%, signal=29%	CXCL2/ADGRL1/IL1B/EPB41L3/KIF26B/CST3/HTR7/H4C1/CEBPD/S100A8/OR1E1
WP_TNF_RELATED_WEAK_INDUCER_OF_APOPTOSIS_TWEAK_SIGNALING_PATHWAY	WP_TNF_RELATED_WEAK_INDUCER_OF_APOPTOSIS_TWEAK_SIGNALING_PATHWAY	40	0.514633	1.69284	0.00842791	tags=32%, list=14%, signal=28%	TNF/JUN/IL6/NFKBIA/NFKB2/TRAF2/TRAF3/TRAF5/NFKBIB/CCL5/AKT1/GSK3B/BIRC3
GOLUB_ALL_VS_AML_DN	GOLUB_ALL_VS_AML_DN	22	0.595673	1.69263	0.0084207	tags=18%, list=2%, signal=18%	CXCL8/PPIF/NFKBIA/ZYX
MANALO_HYPOXIA_UP	MANALO_HYPOXIA_UP	194	0.402538	1.69119	6.63094e-05	tags=25%, list=15%, signal=21%	IER3/BHLHE40/DUSP6/HES1/ADM/PPP1R13L/CLIP2/ADORA2A/TRIO/SERPINE1/SPSB1/SIK1/EDN1/DLGAP4/RGS3/ENO2/BCL6/KLF11/GAS6/MEF2A/GPC1/HIF3A/AK4/MARCHF3/PTPRB/CELF2/CYP4F11/CCNG2/TNFRSF10B/DDIT4/DCHS1/SLC6A8/ATXN1/NYNRIN/FNDC3B/HLA-B/WASF2/MTHFD2L/RPS6KA2/LAMB1/EPOR/FAM171A1/ITM2A/TRIB2/PTPRF/PDGFB/SORBS2/TCF7L1
WP_BREAST_CANCER_PATHWAY	WP_BREAST_CANCER_PATHWAY	148	0.415034	1.69103	0.000261351	tags=21%, list=13%, signal=18%	FOS/JUN/HES1/BAX/MAP2K2/NFKB2/ATM/JAG2/SOS1/NCOA1/PIK3R1/MYC/LRP5/DVL1/DLL3/FRAT1/FZD5/WNT5B/GADD45A/PIK3CD/DVL3/GRB2/IGF1R/WNT10A/WNT4/FGF6/AKT1/FGF20/PIK3R3/CSNK2A1/GSK3B
REACTOME_TRANSCRIPTIONAL_REGULATION_BY_TP53	REACTOME_TRANSCRIPTIONAL_REGULATION_BY_TP53	343	0.381051	1.69093	2.79706e-06	tags=35%, list=22%, signal=28%	FOS/JUN/GATAD2B/TNKS1BP1/PPP1R13L/BAX/ARID3A/APAF1/YWHAE/TAF15/GATAD2A/ATM/TSC1/RABGGTB/SFN/TAF6/TAF5/NELFB/BANP/EHMT2/ZNF385A/G6PD/TP53AIP1/TPX2/BTG2/PIDD1/GTF2F2/PLK2/TOP3A/TP53INP1/CNOT8/RAD1/EP300/USP7/BCL6/TP63/PRR5/SUPT5H/PIP4K2A/SESN2/CTDP1/RFFL/DYRK2/GADD45A/TNFRSF10B/DDIT4/PIP4K2B/MBD3/POLR2J/GLS2/PRMT1/PRKAG2/HIPK1/FAS/KAT6A/RAD17/PPP2CA/TSC2/CNOT3/RNF34/MTA2/COX7A2L/TNRC6C/NPM1/POLR2C/…
REACTOME_TOLL_LIKE_RECEPTOR_9_TLR9_CASCADE	REACTOME_TOLL_LIKE_RECEPTOR_9_TLR9_CASCADE	87	0.451881	1.69029	0.00084595	tags=39%, list=25%, signal=29%	FOS/JUN/DUSP6/NFKBIA/NFKB2/MAP2K7/PPP2R5D/MAPK7/MEF2A/TAB1/APP/PPP2CA/NFKBIB/PPP2R1A/RPS6KA2/DUSP7/TLR7/MAP2K3/RPS6KA3/CUL1/IRAK1/MAPK14/ATF1/RPS27A/FBXW11/HMGB1/PELI1/MAPKAPK2/MAPK1/DUSP3/BTRC/EEA1/IKBKB/MAP3K7
PID_IL2_STAT5_PATHWAY	PID_IL2_STAT5_PATHWAY	29	0.556967	1.68997	0.00726052	tags=45%, list=15%, signal=38%	SOS1/LCK/PIK3R1/MYC/BCL2/GAB2/STAT5B/BCL2L1/GRB2/STAT5A/ELF1/CCNA2/LTA
ELVIDGE_HIF1A_AND_HIF2A_TARGETS_DN	ELVIDGE_HIF1A_AND_HIF2A_TARGETS_DN	98	0.444308	1.68914	0.000589162	tags=24%, list=14%, signal=21%	EGR1/FOS/BHLHE40/ADM/SH2B2/ANKZF1/SOX9/SERPINE1/KDM4B/SAMD4A/PFKFB3/YEATS2/ENO2/AK4/HLA-DRB1/CCNG2/ATXN1/PPFIA4/ILVBL/INSIG2/OBSL1/PDGFB/HK2/DSC2
WP_B_CELL_RECEPTOR_SIGNALING_PATHWAY	WP_B_CELL_RECEPTOR_SIGNALING_PATHWAY	92	0.446013	1.68844	0.000934186	tags=22%, list=9%, signal=20%	JUN/NFKBIA/MAP2K2/PIP5K1A/NFATC3/SOS1/VAV2/CBL/LCK/PIK3R1/MYC/BCL6/KLF11/PIP5K1C/GAB2/PIP5K1B/PTPN18/CD22/GAB1/GRB2
CHIBA_RESPONSE_TO_TSA_UP	CHIBA_RESPONSE_TO_TSA_UP	48	0.497248	1.68812	0.00409841	tags=23%, list=8%, signal=21%	FOS/JUNB/HBEGF/FOSB/SOD3/BSG/HLA-A/TRIP6/RHOG/JUP/ITGA3
ZAIDI_OSTEOBLAST_TRANSCRIPTION_FACTORS	ZAIDI_OSTEOBLAST_TRANSCRIPTION_FACTORS	12	0.694081	1.68774	0.00660644	tags=17%, list=0%, signal=17%	FOS/JUN
MARKS_ACETYLATED_NON_HISTONE_PROTEINS	MARKS_ACETYLATED_NON_HISTONE_PROTEINS	12	0.694063	1.6877	0.00660644	tags=33%, list=5%, signal=32%	JUN/HMGA1/SMAD7/HSP90AA1
SARRIO_EPITHELIAL_MESENCHYMAL_TRANSITION_DN	SARRIO_EPITHELIAL_MESENCHYMAL_TRANSITION_DN	133	0.422271	1.68615	0.000368431	tags=23%, list=14%, signal=20%	EGR1/FOS/ATF3/NFKBIA/CXCL1/CAPZB/GEM/VAV3/ACTA1/IRF6/KLF6/PC/NFIL3/TP53INP1/ERRFI1/BCL6/PNRC1/TP63/CYP4B1/SPRR1B/ENG/GAS1/EFNA1/PCDH9/TSC22D3/MAP3K5/TUT7/POLR3E/BIRC3/DSC2/RSRP1
WP_HUMAN_THYROID_STIMULATING_HORMONE_TSH_SIGNALING_PATHWAY	WP_HUMAN_THYROID_STIMULATING_HORMONE_TSH_SIGNALING_PATHWAY	67	0.47189	1.68542	0.00312599	tags=12%, list=4%, signal=11%	EGR1/FOS/JUN/GNAI2/SRC/PAX8/PIK3R1/MYC
BIOCARTA_MAPK_PATHWAY	BIOCARTA_MAPK_PATHWAY	77	0.457938	1.68509	0.00151869	tags=14%, list=5%, signal=14%	FOS/JUN/NFKBIA/MAP2K2/MAP3K3/MAP2K7/TRAF2/MAPK7/MAP2K5/MYC/MAP3K4
MITSIADES_RESPONSE_TO_APLIDIN_UP	MITSIADES_RESPONSE_TO_APLIDIN_UP	404	0.373544	1.68495	5.19402e-07	tags=26%, list=16%, signal=22%	DUSP1/DUSP6/SLCO4A1/HBEGF/HES1/FOSB/PPP1R15A/DDIT3/CCN1/NUAK2/DUSP5/NFKBIA/ETV1/KLHL21/PHF1/OTUD4/N4BP2L2/CLDND1/TOR3A/CHKA/TNFSF9/SPTBN4/STX5/NCOR2/GEM/JMJD6/NXF1/RABGGTB/SRC/SUPT6H/ARF4/PFKFB3/SKIL/FOSL1/SEC61A2/NLRP1/LCK/TSPYL2/KLF6/DNAJB6/SPOP/AP5Z1/FRAT1/SMAD3/PNRC1/WHRN/NDEL1/CCNL1/PPP1R10/ATG9A/PIP5K1B/NFE2L1/AKAP8L/SLC35A2/HHLA3/BACH1/GADD45A/EIF1/RSRC2/BRF2/CBX8/BCL3/INTS6/TERF2IP/CLK3/M…
WP_MATRIX_METALLOPROTEINASES	WP_MATRIX_METALLOPROTEINASES	29	0.554827	1.68347	0.0079146	tags=45%, list=24%, signal=34%	TNF/BSG/MMP14/MMP24/MMP17/MMP27/TCF20/TIMP2/MMP20/MMP11/MMP16/MMP26/MMP15
BHATI_G2M_ARREST_BY_2METHOXYESTRADIOL_UP	BHATI_G2M_ARREST_BY_2METHOXYESTRADIOL_UP	108	0.434033	1.68346	0.000981786	tags=16%, list=10%, signal=14%	EGR1/FOS/IER3/CCN1/CTPS1/GCLM/NACC2/LIMK1/SMOX/TNPO1/HSP90AA1/PNN/TBX18/GALNT2/WWTR1/CERK/PHIP
REACTOME_ATF4_ACTIVATES_GENES_IN_RESPONSE_TO_ENDOPLASMIC_RETICULUM_STRESS	REACTOME_ATF4_ACTIVATES_GENES_IN_RESPONSE_TO_ENDOPLASMIC_RETICULUM_STRESS	25	0.572159	1.6825	0.0110109	tags=24%, list=9%, signal=22%	CXCL8/ATF3/DDIT3/NFYC/DIS3/EXOSC9
SASAI_TARGETS_OF_CXCR6_AND_PTCH1_UP	SASAI_TARGETS_OF_CXCR6_AND_PTCH1_UP	14	0.661483	1.6824	0.0120795	tags=29%, list=2%, signal=28%	L1CAM/IFFO2/GDPD3/RNF112
REACTOME_REGULATION_OF_TP53_ACTIVITY	REACTOME_REGULATION_OF_TP53_ACTIVITY	151	0.411329	1.68227	0.000452131	tags=41%, list=22%, signal=32%	GATAD2B/PPP1R13L/TAF15/GATAD2A/ATM/TAF6/TAF5/BANP/EHMT2/ZNF385A/TPX2/TOP3A/TP53INP1/RAD1/EP300/USP7/TP63/PRR5/PIP4K2A/RFFL/DYRK2/PIP4K2B/MBD3/PRKAG2/HIPK1/KAT6A/RAD17/PPP2CA/RNF34/MTA2/HIPK2/AKT1/PPP2R1A/STK11/CSNK2A1/ATR/RBBP8/PRKAG1/CCNA2/HUS1/ATRIP/RAD9A/ING2/BRD7/PML/MAPK14/TP53RK/TBP/RAD9B/AURKA/RPS27A/TP53BP2/PIP4P1/CSNK2A2/JMY/CSNK2B/SSRP1/AURKB/BRD1/AKT3/WRN/RAD50
REACTOME_TOLL_LIKE_RECEPTOR_TLR1_TLR2_CASCADE	REACTOME_TOLL_LIKE_RECEPTOR_TLR1_TLR2_CASCADE	94	0.444328	1.68173	0.00150632	tags=34%, list=22%, signal=27%	FOS/JUN/DUSP6/NFKBIA/NFKB2/MAP2K7/PPP2R5D/MAPK7/MEF2A/TAB1/APP/FGG/PPP2CA/NFKBIB/PPP2R1A/RPS6KA2/DUSP7/FGA/MAP2K3/RPS6KA3/CUL1/IRAK1/MAPK14/ATF1/RPS27A/FBXW11/S100A8/HMGB1/PELI1/MAPKAPK2/MAPK1/SFTPD
REACTOME_RECYCLING_PATHWAY_OF_L1	REACTOME_RECYCLING_PATHWAY_OF_L1	47	0.500052	1.68165	0.0041049	tags=40%, list=17%, signal=33%	L1CAM/SRC/TUBA3E/TUBA1A/MSN/DNM2/AP2A1/AP2A2/NUMB/TUBA3D/TUBB4B/TUBB4A/AP2M1/SHTN1/RPS6KA2/AP2S1/RPS6KA3/KIF4B/TUBA3C
BIOCARTA_IL17_PATHWAY	BIOCARTA_IL17_PATHWAY	15	0.649823	1.68154	0.00961091	tags=27%, list=9%, signal=24%	CXCL8/IL6/CD34/IL3
REACTOME_ABORTIVE_ELONGATION_OF_HIV_1_TRANSCRIPT_IN_THE_ABSENCE_OF_TAT	REACTOME_ABORTIVE_ELONGATION_OF_HIV_1_TRANSCRIPT_IN_THE_ABSENCE_OF_TAT	20	0.605301	1.68144	0.00948191	tags=60%, list=22%, signal=47%	NELFB/GTF2F2/SUPT5H/CTDP1/POLR2J/POLR2C/NCBP2/POLR2B/POLR2A/SUPT4H1/NELFA/POLR2D
WP_ATM_SIGNALING_NETWORK_IN_DEVELOPMENT_AND_DISEASE	WP_ATM_SIGNALING_NETWORK_IN_DEVELOPMENT_AND_DISEASE	42	0.50874	1.6802	0.00808274	tags=36%, list=15%, signal=30%	TRIM28/RNF168/ATM/PPM1D/G6PD/SMC1A/RNF40/ATMIN/H2AX/TSC2/MAP3K5/STK11/ATR/RBBP8/PTPA
KEGG_APOPTOSIS	KEGG_APOPTOSIS	77	0.456547	1.67997	0.0016344	tags=34%, list=14%, signal=29%	TNF/NFKBIA/BAX/APAF1/ATM/IL1B/TRAF2/PIK3R1/BCL2/TRADD/PRKX/DFFB/TNFRSF10B/BCL2L1/PIK3CD/IL3/NGF/FAS/PRKAR1B/AKT1/PPP3R1/TNFRSF1A/PIK3R3/NTRK1/BIRC3/PRKACG
REACTOME_REGULATION_OF_TP53_ACTIVITY_THROUGH_ASSOCIATION_WITH_CO_FACTORS	REACTOME_REGULATION_OF_TP53_ACTIVITY_THROUGH_ASSOCIATION_WITH_CO_FACTORS	13	0.672694	1.67939	0.0154008	tags=62%, list=23%, signal=47%	PPP1R13L/BANP/ZNF385A/TP63/AKT1/TP53BP2/AKT3/AKT2
LOCKWOOD_AMPLIFIED_IN_LUNG_CANCER	LOCKWOOD_AMPLIFIED_IN_LUNG_CANCER	204	0.397181	1.67904	0.000111793	tags=28%, list=15%, signal=24%	DDIT3/NFKBIA/SLC4A2/KDM2A/AGPAT1/PRCC/DENND4B/OPA1/ARHGEF11/PIP5K1A/CLCN2/LY6E/GPAA1/ABCC5/TAF6/DEDD/NUMA1/MED15/HYOU1/SKIL/DDX10/CCDC85C/BAZ1A/PC/PPP1CA/MYC/P2RY6/CLPTM1L/MAF1/EIF4G1/PHC3/APIP/CTSK/CORO1B/RIT1/ANAPC15/PNN/TSFM/POLR2J/DVL3/CALM1/SIVA1/TMEM134/ADAR/SRP54/AP2M1/PYGO2/AKT1/B4GALT3/ZNF74/KLC1/TENT4A/ARNT/CRKL/GEMIN2/DPP3/CD44
WU_ALZHEIMER_DISEASE_UP	WU_ALZHEIMER_DISEASE_UP	11	0.706951	1.67793	0.00788074	tags=45%, list=11%, signal=40%	CBFA2T3/FKBP1A/TGM2/ABTB2/PCDH9
BIOCARTA_TID_PATHWAY	BIOCARTA_TID_PATHWAY	15	0.648382	1.67781	0.00999793	tags=13%, list=0%, signal=13%	TNF/NFKBIA
HEDENFALK_BREAST_CANCER_BRACX_UP	HEDENFALK_BREAST_CANCER_BRACX_UP	19	0.611866	1.67767	0.00463729	tags=32%, list=10%, signal=28%	JUNB/SPRY1/COL6A2/CHPF/CYP1A1/PNOC
BURTON_ADIPOGENESIS_9	BURTON_ADIPOGENESIS_9	81	0.455162	1.67643	0.00176955	tags=16%, list=5%, signal=15%	FOS/CXCL2/GSTM1/CCN1/PHLDA1/EPHX1/GEM/NME4/CSF1/CSRP1/CYTH3/PLK2/PLA2G4A
SEKI_INFLAMMATORY_RESPONSE_LPS_UP	SEKI_INFLAMMATORY_RESPONSE_LPS_UP	72	0.462586	1.67518	0.00268904	tags=14%, list=4%, signal=13%	EGR1/IER3/SLCO4A1/NFKBIA/CXCL1/NFKB2/FOSL1/CSF1/PTPRE/PLK2
KYNG_DNA_DAMAGE_BY_4NQO_OR_GAMMA_RADIATION	KYNG_DNA_DAMAGE_BY_4NQO_OR_GAMMA_RADIATION	15	0.646373	1.67261	0.0103849	tags=33%, list=14%, signal=29%	EGR1/AGPAT1/LRRFIP2/GYPB/DCTD
BIOCARTA_DREAM_PATHWAY	BIOCARTA_DREAM_PATHWAY	13	0.669641	1.67177	0.016695	tags=15%, list=0%, signal=15%	FOS/JUN
TSAI_RESPONSE_TO_RADIATION_THERAPY	TSAI_RESPONSE_TO_RADIATION_THERAPY	31	0.538207	1.67165	0.00423898	tags=19%, list=5%, signal=18%	EGR1/IL6/CCN1/SERPINE1/COL6A2/SMAD3
WP_IL1_SIGNALING_PATHWAY	WP_IL1_SIGNALING_PATHWAY	51	0.490479	1.6716	0.00436247	tags=29%, list=17%, signal=24%	JUN/NFKBIA/MAP2K2/MAP3K3/IL1B/MAP2K7/PIK3R1/TOLLIP/TAB1/HSPB2/NFKBIB/AKT1/MAP2K3/IRAK1/MAPK14
KEGG_EPITHELIAL_CELL_SIGNALING_IN_HELICOBACTER_PYLORI_INFECTION	KEGG_EPITHELIAL_CELL_SIGNALING_IN_HELICOBACTER_PYLORI_INFECTION	64	0.47265	1.67004	0.00177985	tags=12%, list=2%, signal=12%	JUN/CXCL8/HBEGF/NFKBIA/CXCL1/ATP6V0C/SRC/GIT1
LU_IL4_SIGNALING	LU_IL4_SIGNALING	87	0.446283	1.66935	0.00122192	tags=24%, list=14%, signal=21%	EGR1/BHLHE40/IL6/HOXC4/SPAG1/NFIL3/EIF4G1/BCL6/MTCL1/PDE7A/PEG10/CCL4/ATXN1/PPP2CA/HUWE1/HLX/CCL5/GNG2/MAP3K5/TLR7/HOMER2
FOSTER_TOLERANT_MACROPHAGE_DN	FOSTER_TOLERANT_MACROPHAGE_DN	390	0.372046	1.66883	2.50998e-06	tags=18%, list=10%, signal=17%	FOS/CXCL2/JUNB/IL6/HBEGF/CSRNP1/AGRN/ZFP36/DUSP5/SLCO3A1/ZNRF3/SERTAD1/APAF1/NFIX/CGAS/CXCL1/MT1A/TNFSF9/SERPINE1/SPSB1/FLNB/SLC30A1/EDN1/SRC/DCP1A/PIK3R6/SOCS3/IL1B/ZYX/ARF4/MT1X/PFKFB3/LCK/TLK2/GPSM2/CSF1/PMEPA1/XKR8/SDC4/TRIM21/NFIL3/SLC12A4/ERRFI1/PLA2G4A/ZBTB8A/TIPARP/TNC/ADGRG6/FZD5/DGKA/DUSP14/GOLGA3/NECTIN2/TMEM229B/MAPKBP1/CREB5/PRKX/RFFL/ETV3/IRF2/ABTB2/ILRUN/BCL3/PRR5L/WDR43/ST6GALNAC4…
DORN_ADENOVIRUS_INFECTION_12HR_UP	DORN_ADENOVIRUS_INFECTION_12HR_UP	27	0.557249	1.66824	0.012449	tags=26%, list=8%, signal=24%	JUNB/CCN1/EPHA2/NFKB2/PLK2/CYTH1/SRSF1
WP_NONALCOHOLIC_FATTY_LIVER_DISEASE	WP_NONALCOHOLIC_FATTY_LIVER_DISEASE	143	0.411477	1.6681	0.000505701	tags=24%, list=15%, signal=21%	TNF/JUN/CXCL8/IL6/DDIT3/BAX/SMAD7/MIR21/SOCS3/IL1B/MLX/TRAF2/NDUFB4/PIK3R1/IRS1/PPARA/SREBF1/SDHC/ADIPOR1/PIK3CD/PRKAG2/FAS/RXRA/COX7A2L/AKT1/TNFRSF1A/EIF2AK3/PIK3R3/MAP3K5/GSK3B/NDUFV2/COX7B2/PRKAG1/NDUFV1/MAP3K11
WP_NANOPARTICLE_TRIGGERED_AUTOPHAGIC_CELL_DEATH	WP_NANOPARTICLE_TRIGGERED_AUTOPHAGIC_CELL_DEATH	21	0.594025	1.66778	0.0115861	tags=38%, list=13%, signal=33%	MIR21/TSC1/BCL2/ATG9B/ATG16L1/TSC2/MAP1LC3A/ATG14
BIOCARTA_EGF_PATHWAY	BIOCARTA_EGF_PATHWAY	26	0.562045	1.66646	0.0090949	tags=35%, list=15%, signal=30%	FOS/JUN/SOS1/PIK3R1/GRB2/STAT5A/RASA1/CSNK2A1/PRKCB
WP_GALANIN_RECEPTOR_PATHWAY	WP_GALANIN_RECEPTOR_PATHWAY	19	0.607751	1.66638	0.00545748	tags=11%, list=0%, signal=11%	FOS/IL6
BOQUEST_STEM_CELL_CULTURED_VS_FRESH_UP	BOQUEST_STEM_CELL_CULTURED_VS_FRESH_UP	406	0.369559	1.66485	3.32971e-06	tags=13%, list=8%, signal=12%	EGR1/DUSP1/CXCL2/JUN/CXCL8/JUNB/BHLHE40/ATF3/GDF15/HBEGF/PPP1R15A/SPRY1/ZFP36/SPRY2/NFKBIA/BAX/SLC43A3/AKAP13/CXCL1/GFPT1/HNRNPM/SERPINE1/DNAJB1/GEM/NACC2/PFKFB3/PLTP/SCG5/NDRG2/G6PD/ID1/GAS7/TPX2/BTG2/KLF6/PIK3R1/FAM117A/ADAM12/MYC/WARS1/KCNAB1/KLF11/MAN1C1/LTBP4/TPGS2/CTSK/CCNL1/CYP4B1/EIF5/CD34/TPM2/CELF2/EIF1/TRPC4
WP_ESTROGEN_RECEPTOR_PATHWAY	WP_ESTROGEN_RECEPTOR_PATHWAY	12	0.684538	1.66454	0.00896114	tags=33%, list=10%, signal=30%	JUN/PPARA/CYP1A1/ACOX1
WP_HOSTPATHOGEN_INTERACTION_OF_HUMAN_CORONA_VIRUSES_INTERFERON_INDUCTION	WP_HOSTPATHOGEN_INTERACTION_OF_HUMAN_CORONA_VIRUSES_INTERFERON_INDUCTION	30	0.539435	1.66129	0.00823524	tags=10%, list=0%, signal=10%	FOS/JUN/NFKBIA
WIERENGA_STAT5A_TARGETS_UP	WIERENGA_STAT5A_TARGETS_UP	189	0.396132	1.65846	0.000374696	tags=29%, list=19%, signal=23%	EGR1/CXCL8/BHLHE40/ADM/DUSP5/CTSZ/PHLDA1/MIIP/ST3GAL4/SOS1/CERCAM/RNF217/IGFBP4/BTG2/KLF6/NFIL3/MOSPD3/CKAP4/LTB/POU2F1/DDIT4/VASN/TGM2/CFH/COL6A1/FNDC3B/KLF2/PLXNA3/CCL5/GNG2/ST3GAL5/GYPB/MEX3D/HSPA2/TMEFF2/PIM1/TULP3/RABGAP1/TLE3/SEMA6C/FCGR2A/CTNS/TRIB1/CLEC4A/FAM126B/RHEBL1/MYO10/SNTA1/OSM/TNFRSF4/GABARAPL1/DAPK1/PLEKHA4/TRIM46
REACTOME_INTERLEUKIN_17_SIGNALING	REACTOME_INTERLEUKIN_17_SIGNALING	68	0.464651	1.65809	0.00352288	tags=37%, list=22%, signal=29%	FOS/JUN/DUSP6/MAP2K7/IL17RB/PPP2R5D/MAPK7/MEF2A/TAB1/PPP2CA/PPP2R1A/RPS6KA2/DUSP7/MAP2K3/RPS6KA3/CUL1/IRAK1/MAPK14/ATF1/RPS27A/FBXW11/IL17C/IL17RC/MAPKAPK2/MAPK1
REACTOME_HSP90_CHAPERONE_CYCLE_FOR_STEROID_HORMONE_RECEPTORS_SHR	REACTOME_HSP90_CHAPERONE_CYCLE_FOR_STEROID_HORMONE_RECEPTORS_SHR	53	0.483044	1.65806	0.00722146	tags=26%, list=11%, signal=24%	CAPZB/STIP1/DNAJB1/TUBA3E/TUBA1A/DYNC1H1/DNAJA1/DCTN1/HSP90AA1/HSP90AB1/TUBA3D/TUBB4B/NR3C2/TUBB4A
GHANDHI_BYSTANDER_IRRADIATION_UP	GHANDHI_BYSTANDER_IRRADIATION_UP	77	0.450448	1.65753	0.00209722	tags=25%, list=14%, signal=21%	CXCL2/CXCL8/DUSP5/CXCL1/GCLM/MT1H/ZSWIM8/IL1B/MT1X/MT1E/PLA2G4A/CREB5/SRSF12/GCH1/IFNE/PTGES/EPB41L4B/TUT7/BIRC3
REACTOME_DEATH_RECEPTOR_SIGNALLING	REACTOME_DEATH_RECEPTOR_SIGNALLING	132	0.41508	1.65751	0.000792044	tags=22%, list=10%, signal=20%	TNF/NFKBIA/AKAP13/YWHAE/ARHGEF1/ARHGDIA/ARHGEF11/TRIO/ARHGEF6/MAGED1/VAV3/SOS1/VAV2/MADD/RBCK1/TRAF2/ITSN1/NET1/ARHGEF2/RTN4/ARHGEF39/TRADD/MAG/TAB1/SPPL2B/OBSCN/TNFRSF10B/NGF/FAS
ASTIER_INTEGRIN_SIGNALING	ASTIER_INTEGRIN_SIGNALING	51	0.486171	1.65691	0.00527766	tags=33%, list=17%, signal=28%	FOS/SPRY1/N4BP2L2/VAV2/ZYX/DLGAP4/CACTIN/GFRA2/ETV4/CORO1A/GAA/ACACB/ABCA4/GDPD5/LYPD1/LGALS8/LIMK2
PID_P53_REGULATION_PATHWAY	PID_P53_REGULATION_PATHWAY	57	0.476293	1.6556	0.0035542	tags=39%, list=15%, signal=33%	TRIM28/PPP1R13L/CSNK1E/ATM/PPM1D/RASSF1/TP53AIP1/CSNK1G3/EP300/USP7/CSNK1G1/DYRK2/PPP2CA/HUWE1/CSNK1D/HIPK2/AKT1/GSK3B/ATR/CSNK1G2/CCNA2/PTPA
REACTOME_SIGNALING_BY_RECEPTOR_TYROSINE_KINASES	REACTOME_SIGNALING_BY_RECEPTOR_TYROSINE_KINASES	475	0.364547	1.65535	4.22969e-07	tags=24%, list=16%, signal=20%	EGR1/FOS/JUNB/DUSP6/HBEGF/FOSB/SPRY1/SH2B2/SPRY2/BAX/DLG4/ATP6V0C/GRB7/TIAL1/FURIN/ADORA2A/HNRNPM/MAP2K2/CDK5R2/VAV3/SOS1/COL3A1/SRC/NELFB/AAMP/VAV2/FOSL1/REST/CBL/NAB2/PTK2B/SHB/LCK/PPP2R5D/MATK/ID1/COL6A2/GTF2F2/PIK3R1/MAPK7/MAP2K5/ADAM12/DNM2/EP300/IRS1/AP2A1/BAIAP2/AP2A2/COL9A2/HSP90AA1/PTPN3/MEF2A/GAB2/PRR5/VEGFB/STAT5B/STUB1/KIDINS220/RIT1/PTPN18/JUP/GAB1/ITGA3/POLR2J/CALM1/GRB2/NGF/IGF1R/R…
WP_MET_IN_TYPE_1_PAPILLARY_RENAL_CELL_CARCINOMA	WP_MET_IN_TYPE_1_PAPILLARY_RENAL_CELL_CARCINOMA	58	0.473862	1.65409	0.00288377	tags=28%, list=15%, signal=24%	JUN/PRCC/MAP2K2/SOS1/SRC/CBL/PIK3R1/PAK4/GAB1/PIK3CD/GRB2/TFE3/AKT1/PIK3R3/PAK5/CRKL
WP_HEPATITIS_C_AND_HEPATOCELLULAR_CARCINOMA	WP_HEPATITIS_C_AND_HEPATOCELLULAR_CARCINOMA	48	0.48709	1.65363	0.00523518	tags=38%, list=19%, signal=30%	JUN/CXCL8/IL6/SOS1/VAV2/CTTN/MYC/SMAD3/BCL2L1/GRB2/AKT1/BIRC3/CD44/IL6R/CASP9/MAPK14/LEF1/PODXL
PID_IL8_CXCR1_PATHWAY	PID_IL8_CXCR1_PATHWAY	25	0.562206	1.65323	0.0133302	tags=36%, list=15%, signal=31%	CXCL8/GNAI2/PIK3R6/CBL/ARRB2/GNG2/AKT1/ARRB1/PRKCB
WP_DNA_DAMAGE_RESPONSE_ONLY_ATM_DEPENDENT	WP_DNA_DAMAGE_RESPONSE_ONLY_ATM_DEPENDENT	106	0.427267	1.65306	0.00254503	tags=27%, list=15%, signal=24%	JUN/BAX/NFKB2/ATM/PIK3C2A/SOS1/FOSL1/PIK3R1/MYC/IRS1/DVL1/MAP3K4/BCL6/FRAT1/SMAD3/WNT5B/BCL2/CCNG2/PIK3CD/DVL3/GRB2/WNT10A/WNT4/AKT1/PIK3R3/GSK3B/LDLR/MLKL/TCF7L1
OKAWA_NEUROBLASTOMA_1P36_31_DELETION	OKAWA_NEUROBLASTOMA_1P36_31_DELETION	21	0.58854	1.65238	0.0139201	tags=43%, list=13%, signal=37%	KLHL21/PHF13/TNFRSF25/DNAJC11/ICMT/NPHP4/RNF207/RPL22/AJAP1
ASTON_MAJOR_DEPRESSIVE_DISORDER_UP	ASTON_MAJOR_DEPRESSIVE_DISORDER_UP	47	0.490972	1.65111	0.00599008	tags=23%, list=12%, signal=21%	JUN/GSTM1/TSC1/SAMD4A/TNFRSF25/AHCYL2/ACD/TPM2/CELF2/PPFIA4/CEP250
REACTOME_RETROGRADE_NEUROTROPHIN_SIGNALLING	REACTOME_RETROGRADE_NEUROTROPHIN_SIGNALLING	14	0.648838	1.65024	0.015617	tags=50%, list=14%, signal=43%	DNM2/AP2A1/AP2A2/NGF/AP2M1/NTRK1/AP2S1
REACTOME_UPTAKE_AND_ACTIONS_OF_BACTERIAL_TOXINS	REACTOME_UPTAKE_AND_ACTIONS_OF_BACTERIAL_TOXINS	29	0.54387	1.65023	0.0127548	tags=55%, list=20%, signal=44%	HBEGF/FURIN/MAP2K2/MAP2K7/SV2A/HSP90AA1/HSP90AB1/CALM1/STX1A/MAP2K3/SYT2/TXNRD1/VAMP1/SYT1/STX1B/ANTXR2
PID_THROMBIN_PAR1_PATHWAY	PID_THROMBIN_PAR1_PATHWAY	42	0.499515	1.64973	0.012218	tags=29%, list=12%, signal=25%	AKAP13/PKN1/ARHGEF1/ARHGDIA/GNAI2/ZYX/PIK3R1/DNM2/GNAO1/GNG2/F2/ARRB1
REACTOME_SIGNALING_BY_EGFR_IN_CANCER	REACTOME_SIGNALING_BY_EGFR_IN_CANCER	22	0.580407	1.64925	0.0138239	tags=32%, list=9%, signal=29%	HBEGF/SOS1/CBL/PIK3R1/HSP90AA1/GAB1/GRB2
REACTOME_SIGNALING_BY_FLT3_ITD_AND_TKD_MUTANTS	REACTOME_SIGNALING_BY_FLT3_ITD_AND_TKD_MUTANTS	16	0.630883	1.64906	0.0129875	tags=50%, list=14%, signal=43%	SOS1/PIK3R1/GAB2/STAT5B/BCL2L1/GRB2/STAT5A/PIM1
MATZUK_CENTRAL_FOR_FEMALE_FERTILITY	MATZUK_CENTRAL_FOR_FEMALE_FERTILITY	28	0.547012	1.64904	0.0081777	tags=14%, list=6%, signal=13%	EGR1/KISS1/CRTC1/GGT1
PUIFFE_INVASION_INHIBITED_BY_ASCITES_UP	PUIFFE_INVASION_INHIBITED_BY_ASCITES_UP	71	0.45752	1.64802	0.00300691	tags=38%, list=22%, signal=30%	ACIN1/GCLM/STIP1/FKBP1A/G6PD/IGFBP4/PPP2R5D/TPX2/PLEC/XKR8/MAZ/EIF4G1/BCL2L1/CALM1/CDCA8/ATP2B4/EPOR/MICB/SIAH2/MARS1/PTBP1/F3/HMGB3/NR2F2/BCAM/TYMS/MCM3
DELPUECH_FOXO3_TARGETS_UP	DELPUECH_FOXO3_TARGETS_UP	64	0.466236	1.64738	0.0023482	tags=31%, list=15%, signal=27%	DUSP6/CCN1/DUSP5/GRB7/EDN1/ABCC5/SPAG1/MARCKSL1/BCL6/RERE/CORO1A/TNFAIP8/CCNG2/WDR45/IGF1R/MAP3K5/UBE2H/MXD1/TIMP2/CAV1
FAELT_B_CLL_WITH_VH3_21_UP	FAELT_B_CLL_WITH_VH3_21_UP	43	0.494587	1.64696	0.00990431	tags=40%, list=11%, signal=35%	PRRC2A/HMGA1/ARHGEF1/CLUH/SRC/FAM214B/PPT2/PKMYT1/MYO9B/DVL1/EIF4G1/SBNO2/KDM5C/PRKCSH/STXBP2/CNOT3/POR
MARTINEZ_RESPONSE_TO_TRABECTEDIN	MARTINEZ_RESPONSE_TO_TRABECTEDIN	49	0.485084	1.64623	0.00548556	tags=22%, list=10%, signal=20%	NCOR2/DDX10/ID1/SPIDR/IRS1/SMAD3/NUMB/POLA1/STK3/KANK1/ADK
MALONEY_RESPONSE_TO_17AAG_UP	MALONEY_RESPONSE_TO_17AAG_UP	36	0.510685	1.64538	0.00914683	tags=25%, list=6%, signal=24%	KLF10/UCP2/STX5/UBA1/MYL9/PLTP/NFIL3/PCOLCE/SERPINH1
LUI_THYROID_CANCER_CLUSTER_4	LUI_THYROID_CANCER_CLUSTER_4	13	0.658589	1.64418	0.021354	tags=38%, list=8%, signal=36%	ZYX/PLTP/WARS1/GUSBP11/HLA-DRB1
WP_MELANOMA	WP_MELANOMA	66	0.462618	1.64333	0.00302637	tags=23%, list=13%, signal=20%	FOS/BAX/MAP2K2/SOS1/CALML4/PIK3R1/GADD45A/GRIN2A/PIK3CD/CALM1/GRB2/NF1/AKT1/PIK3R3/PREX2
FIRESTEIN_CTNNB1_PATHWAY	FIRESTEIN_CTNNB1_PATHWAY	31	0.529065	1.64326	0.00596004	tags=29%, list=13%, signal=25%	EPHA2/PKN1/CSNK1E/PTK2B/CSNK1G3/LATS1/LTK/DKC1/DGKH
ZHAN_LATE_DIFFERENTIATION_GENES_DN	ZHAN_LATE_DIFFERENTIATION_GENES_DN	16	0.628554	1.64297	0.0131168	tags=31%, list=5%, signal=30%	EPHX1/PKM/LCK/MARCKSL1/BCL6
WP_VITAMIN_B12_METABOLISM	WP_VITAMIN_B12_METABOLISM	45	0.489495	1.64254	0.0072965	tags=24%, list=13%, signal=21%	TNF/IL6/SOD3/NFKB2/SERPINE1/IL1B/SCARB1/F7/CCL5/F2/LDLR
FLECHNER_BIOPSY_KIDNEY_TRANSPLANT_OK_VS_DONOR_DN	FLECHNER_BIOPSY_KIDNEY_TRANSPLANT_OK_VS_DONOR_DN	24	0.563488	1.64129	0.0162901	tags=21%, list=6%, signal=20%	FOS/BAX/GPAA1/MYC/C1QL1
AMIT_SERUM_RESPONSE_120_MCF10A	AMIT_SERUM_RESPONSE_120_MCF10A	63	0.465996	1.64104	0.00256592	tags=22%, list=8%, signal=21%	JUNB/KLF10/SOX9/SIK1/CLCF1/EDN1/SKIL/DUSP10/PPP2R5D/ID1/TRIM21/TESK1/GADD45A/ATP8B1
BOYAULT_LIVER_CANCER_SUBCLASS_G6_DN	BOYAULT_LIVER_CANCER_SUBCLASS_G6_DN	19	0.598079	1.63986	0.00729149	tags=26%, list=13%, signal=23%	HES1/SDC4/TRIM15/RRBP1/LDLR
PID_BCR_5PATHWAY	PID_BCR_5PATHWAY	60	0.467849	1.63962	0.00490434	tags=23%, list=13%, signal=20%	FOS/JUN/NFKBIA/SOS1/VAV2/PIK3R1/CD22/CAMK2G/GRB2/NFKBIB/PAG1/AKT1/RASA1/CSNK2A1
MATTIOLI_MGUS_VS_PCL	MATTIOLI_MGUS_VS_PCL	93	0.432684	1.63956	0.0033642	tags=28%, list=13%, signal=24%	CXCL8/JUNB/PPP1R15A/UBA1/MCM4/TUBA1A/SMC1A/SAC3D1/TUBB/GUSBP11/CDC73/MCM5/MCM2/CCNL1/PFN1/CORO1A/LILRB1/XPO1/SRSF1/TBRG4/LST1/LAPTM4B/LPCAT4/RRP9/CCT3/CSNK2A1
HOFMANN_MYELODYSPLASTIC_SYNDROM_LOW_RISK_DN	HOFMANN_MYELODYSPLASTIC_SYNDROM_LOW_RISK_DN	29	0.540242	1.63922	0.0140669	tags=24%, list=6%, signal=23%	IER3/GDF15/STIP1/MAGEA4/CDK2AP2/DUSP14/CKAP4
SA_PTEN_PATHWAY	SA_PTEN_PATHWAY	17	0.618137	1.6391	0.015142	tags=76%, list=29%, signal=55%	SOS1/PTK2B/PIK3CD/GRB2/AKT1/BPNT1/AKT3/MAPK1/SHC1/AKT2/PIK3CA/PTEN/ILK
WP_BRAINDERIVED_NEUROTROPHIC_FACTOR_BDNF_SIGNALING_PATHWAY	WP_BRAINDERIVED_NEUROTROPHIC_FACTOR_BDNF_SIGNALING_PATHWAY	137	0.407782	1.63689	0.000753446	tags=30%, list=19%, signal=25%	EGR1/FOS/JUN/SH2B2/NFKBIA/MAP2K2/VAV3/SRC/VAV2/CRTC1/PTK2B/PIK3R1/MAPK7/MAP2K5/IRS1/SYN1/RHOG/MEF2A/STAT5B/KIDINS220/CAMK4/GRB2/NGF/PPP2CA/STAT5A/TSC2/ACACB/AKT1/CSNK2A1/GSK3B/NTRK1/PTPRF/CAMK1/RPS6KA3/MAPK14/NTRK3/EIF4EBP1/CNR1/NCAM1/NCK2/EGR2
LEE_AGING_NEOCORTEX_UP	LEE_AGING_NEOCORTEX_UP	72	0.451897	1.63647	0.00428238	tags=15%, list=9%, signal=14%	FOS/JUNB/DDIT3/CTSZ/TUBB/RHOG/SEMA4B/MAG/GADD45A/RUFY1/SET
KOBAYASHI_RESPONSE_TO_ROMIDEPSIN	KOBAYASHI_RESPONSE_TO_ROMIDEPSIN	18	0.606739	1.63629	0.0181851	tags=11%, list=0%, signal=11%	FOS/CXCL8
NIKOLSKY_BREAST_CANCER_12Q24_AMPLICON	NIKOLSKY_BREAST_CANCER_12Q24_AMPLICON	15	0.632196	1.63593	0.0141311	tags=53%, list=20%, signal=43%	POLE/MMP17/GOLGA3/ANKLE2/PUS1/DDX51/NOC4L/GALNT9
REACTOME_SIGNALING_BY_NTRK3_TRKC	REACTOME_SIGNALING_BY_NTRK3_TRKC	17	0.616741	1.6354	0.0156597	tags=41%, list=9%, signal=37%	BAX/SOS1/SRC/NELFB/PIK3R1/IRS1/GRB2
GILMORE_CORE_NFKB_PATHWAY	GILMORE_CORE_NFKB_PATHWAY	10	0.708673	1.63464	0.00975882	tags=40%, list=10%, signal=36%	NFKBIA/NFKB2/BCL3/NFKBIB
MARIADASON_REGULATED_BY_HISTONE_ACETYLATION_DN	MARIADASON_REGULATED_BY_HISTONE_ACETYLATION_DN	38	0.50342	1.63421	0.0096792	tags=26%, list=8%, signal=24%	OGDH/OTUD4/TRIM47/ST3GAL4/GIT1/USF2/GTF2IRD1/GAS6/PAN3/KANK1
NAKAMURA_ADIPOGENESIS_LATE_DN	NAKAMURA_ADIPOGENESIS_LATE_DN	34	0.511887	1.63406	0.0151906	tags=18%, list=8%, signal=16%	GDF15/IER2/CCN1/SERPINE1/SMAD3/ITGA3
REACTOME_P75_NTR_RECEPTOR_MEDIATED_SIGNALLING	REACTOME_P75_NTR_RECEPTOR_MEDIATED_SIGNALLING	93	0.431179	1.63386	0.00348121	tags=20%, list=8%, signal=19%	NFKBIA/AKAP13/YWHAE/ARHGEF1/ARHGDIA/ARHGEF11/TRIO/ARHGEF6/MAGED1/VAV3/SOS1/VAV2/ITSN1/NET1/ARHGEF2/RTN4/ARHGEF39/MAG/OBSCN
REACTOME_GASTRIN_CREB_SIGNALLING_PATHWAY_VIA_PKC_AND_MAPK	REACTOME_GASTRIN_CREB_SIGNALLING_PATHWAY_VIA_PKC_AND_MAPK	18	0.605626	1.63329	0.018443	tags=50%, list=22%, signal=39%	HBEGF/SOS1/MAPK7/GRB2/RPS6KA2/RPS6KA3/GAST/EGFR/MAPK1
DAZARD_RESPONSE_TO_UV_SCC_DN	DAZARD_RESPONSE_TO_UV_SCC_DN	109	0.419786	1.63263	0.00266255	tags=34%, list=19%, signal=28%	NAV3/CCN1/KDM2A/MT2A/ID1/TLK2/TGIF1/SPOP/MYC/KIFC1/ERF/TIPARP/AMD1/NUP153/MPHOSPH10/BAIAP2/RAP1GAP2/TP63/BAG5/TNFAIP8/DDIT4/SHOC2/KAT6A/CHD8/TNFRSF1A/PXDC1/CNOT4/TENT4A/MCL1/CRKL/TRAM2/MTF2/DYRK1A/SIAH2/HEG1/AURKA/MARK3
HAN_JNK_SINGALING_UP	HAN_JNK_SINGALING_UP	34	0.511308	1.63221	0.0151906	tags=9%, list=0%, signal=9%	DUSP1/JUN/CCN1
GARGALOVIC_RESPONSE_TO_OXIDIZED_PHOSPHOLIPIDS_GREY_UP	GARGALOVIC_RESPONSE_TO_OXIDIZED_PHOSPHOLIPIDS_GREY_UP	15	0.630565	1.63171	0.0151683	tags=27%, list=2%, signal=26%	NAV3/DUSP5/ADAMTS1/SOS1
WP_APOPTOSIS	WP_APOPTOSIS	76	0.44457	1.63139	0.00323187	tags=41%, list=17%, signal=34%	TNF/JUN/NFKBIA/BAX/APAF1/HELLS/IRF6/TRAF2/PIK3R1/TNFRSF25/MYC/BCL2/TP63/HRK/TRADD/DFFB/TRAF3/TNFRSF10B/BCL2L1/IRF2/FAS/IGF1R/NFKBIB/AKT1/TNFRSF1A/MCL1/BIRC3/LTA/IRF5/BAK1/CASP9
PID_BETA_CATENIN_NUC_PATHWAY	PID_BETA_CATENIN_NUC_PATHWAY	78	0.444044	1.63111	0.00182804	tags=29%, list=16%, signal=25%	JUN/CXCL8/CCN1/YWHAE/SFN/TBL1XR1/PITX2/MYC/EP300/TLE5/CAMK4/TERT/XPO1/DVL3/CHD8/MED12/DKK1/CTNNBIP1/TCF7L1/CUL1/CBY1/TLE1/YWHAZ
REACTOME_CREATINE_METABOLISM	REACTOME_CREATINE_METABOLISM	10	0.707091	1.63099	0.0102972	tags=60%, list=19%, signal=49%	CKMT1B/SLC6A8/GAMT/CKMT1A/SLC6A11/CKMT2
PID_MET_PATHWAY	PID_MET_PATHWAY	77	0.443136	1.63062	0.00267576	tags=17%, list=9%, signal=15%	EGR1/JUN/MAP2K2/SOS1/SRC/CBL/PIK3R1/AKT1S1/PAK4/NUMB/GAB2/GAB1/GRB2
CAFFAREL_RESPONSE_TO_THC_DN	CAFFAREL_RESPONSE_TO_THC_DN	30	0.529066	1.62936	0.0114271	tags=40%, list=17%, signal=33%	PPIF/TUBA1A/UHRF1/TUBB/DNAJA1/SPIDR/GIPC1/HSPA2/CCNA2/TMEM109/ZWINT/TUBA3C
REACTOME_SIGNALING_BY_FGFR4	REACTOME_SIGNALING_BY_FGFR4	41	0.49128	1.62874	0.0134994	tags=39%, list=24%, signal=30%	SPRY2/SOS1/SRC/CBL/PIK3R1/GAB1/GRB2/PPP2CA/FGF6/PPP2R1A/FGF20/FGFR4/RPS27A/MAPK1/SHC1/PIK3CA
REACTOME_SPRY_REGULATION_OF_FGF_SIGNALING	REACTOME_SPRY_REGULATION_OF_FGF_SIGNALING	16	0.623068	1.62863	0.0151946	tags=38%, list=12%, signal=33%	SPRY2/SRC/CBL/GRB2/PPP2CA/PPP2R1A
WEBER_METHYLATED_IN_COLON_CANCER	WEBER_METHYLATED_IN_COLON_CANCER	17	0.614142	1.62851	0.0164362	tags=35%, list=17%, signal=29%	ZNF677/ADAM12/WWTR1/ZNF566/PAX6/RASL11A
WP_NOCGMPPKG_MEDIATED_NEUROPROTECTION	WP_NOCGMPPKG_MEDIATED_NEUROPROTECTION	45	0.484713	1.62649	0.00852277	tags=24%, list=11%, signal=22%	TNF/NFKBIA/DLG4/IL1B/BCL2/NPPB/CAMK2G/GRIN2A/CALM1/CNGB1/GRIN2C
CHIARADONNA_NEOPLASTIC_TRANSFORMATION_CDC25_DN	CHIARADONNA_NEOPLASTIC_TRANSFORMATION_CDC25_DN	143	0.401138	1.62619	0.00100275	tags=20%, list=11%, signal=18%	DUSP1/BHLHE40/AGRN/ADM/GSTM1/PNPLA2/SLC29A1/TRIM47/PLTP/IGFBP4/GAS7/EMP3/CSRP1/LY6H/ARHGEF2/SEMA3F/BAIAP2/RBMS2/NFE2L1/GPC1/CD34/NPPB/GIPC1/FHL2/SEC14L1/TOB1/MAP1LC3B/KLF2/ATP6V0B
REACTOME_SIGNALING_BY_FGFR2	REACTOME_SIGNALING_BY_FGFR2	68	0.455453	1.62526	0.00484769	tags=28%, list=14%, signal=24%	SPRY2/TIAL1/HNRNPM/SOS1/SRC/CBL/GTF2F2/PIK3R1/GAB1/POLR2J/GRB2/PPP2CA/FGF6/POLR2C/PPP2R1A/NCBP2/FGF20/POLR2B/POLR2A
ZWANG_CLASS_1_TRANSIENTLY_INDUCED_BY_EGF	ZWANG_CLASS_1_TRANSIENTLY_INDUCED_BY_EGF	483	0.356839	1.62509	2.9232e-06	tags=27%, list=19%, signal=23%	JUN/SPRY4/IER2/CCN1/ZFP36/SPRY2/SLC38A2/ADAMTS1/SLC25A25/IFFO2/KLHL21/SERTAD1/AKAP13/ARAP2/RNF19B/PTMS/SOX9/PIP5K1A/DYRK1B/JAG2/MPRIP/S100A16/CDV3/DGKD/TRIM39/DAPK3/RNF217/PCDH7/SKIL/DUSP10/FOSL1/LEKR1/PTK2B/MAGI1/SHB/ID1/ATL1/SOCS5/AKIRIN1/CBX4/UBE3A/CSRP1/PTPRE/KLF6/SDC4/MYC/SMOX/ENO2/ARHGEF2/TNC/TOLLIP/ARFGAP3/SMAD3/ENTPD7/LYST/TAF5L/RNH1/L1TD1/SIPA1L2/ARPP19/MOCS3/PIM3/MYO5B/BEND7/CYTH1/PRKCH…
REACTOME_POTENTIAL_THERAPEUTICS_FOR_SARS	REACTOME_POTENTIAL_THERAPEUTICS_FOR_SARS	78	0.442394	1.62505	0.00200353	tags=36%, list=17%, signal=30%	GATAD2B/FURIN/GATAD2A/MTA1/ATP1B1/REST/FKBP1A/TUBB/SAP30L/SIGMAR1/AP2A1/AP2A2/HSP90AA1/HSP90AB1/ATP1A1/SAP18/MBD3/S1PR1/IFNAR2/IMPDH1/MTA2/AP2M1/TLR7/BRMS1/AP2S1/FXYD7/ARID4B/IL6R
REACTOME_INTERLEUKIN_2_FAMILY_SIGNALING	REACTOME_INTERLEUKIN_2_FAMILY_SIGNALING	42	0.491893	1.62456	0.0154897	tags=50%, list=24%, signal=38%	SOS1/PTK2B/LCK/PIK3R1/GAB2/STAT5B/IL9/PIK3CD/GRB2/IL3/STAT5A/IL9R/PIK3R3/INPPL1/LGALS9/IL5/SHC1/PIK3CA/CSF2RA/PTPN6/IL15RA
WP_SLEEP_REGULATION	WP_SLEEP_REGULATION	35	0.504901	1.62391	0.0179072	tags=37%, list=19%, signal=30%	FOS/IL6/ADORA2A/SLC29A1/CACNA1I/GRIN2A/ADORA1/CST3/AHCY/CHRNB2/HCRTR2/HCRTR1/OXT
KEGG_LEISHMANIA_INFECTION	KEGG_LEISHMANIA_INFECTION	63	0.460972	1.62335	0.00322703	tags=13%, list=8%, signal=12%	FOS/TNF/JUN/NFKBIA/IL1B/MARCKSL1/TAB1/HLA-DRB1
REACTOME_SIGNALING_BY_TGFB_FAMILY_MEMBERS	REACTOME_SIGNALING_BY_TGFB_FAMILY_MEMBERS	99	0.425837	1.62167	0.00212282	tags=23%, list=10%, signal=21%	JUNB/PPP1R15A/SMAD7/FURIN/SERPINE1/NCOR2/SKIL/CBL/FKBP1A/MEN1/PMEPA1/TGIF1/PPP1CA/MYC/SMAD3/BMPR1B/STUB1/RNF111/XPO1/DRAP1/BMPR2/WWTR1/FSTL3
MURATA_VIRULENCE_OF_H_PILORI	MURATA_VIRULENCE_OF_H_PILORI	18	0.601119	1.62113	0.0194748	tags=33%, list=11%, signal=30%	L1CAM/COL6A2/CTTN/BCL6/GAS6/COL6A1
MISSIAGLIA_REGULATED_BY_METHYLATION_UP	MISSIAGLIA_REGULATED_BY_METHYLATION_UP	116	0.411999	1.62112	0.00280825	tags=25%, list=14%, signal=22%	DUSP1/DUSP6/ATF3/DUSP5/KDM2A/RBM38/TMEM184B/LY6E/SERPINE1/ATP1B1/IL1B/ARF4/SDC4/TRIM21/PPT2/GADD45A/ACSS1/IL32/SLC6A8/MAP1LC3B/EVX2/SCAMP2/RRBP1/ST3GAL5/RAB9A/UBE2H/GRK4/BIRC3/MAP2K3
SUH_COEXPRESSED_WITH_ID1_AND_ID2_UP	SUH_COEXPRESSED_WITH_ID1_AND_ID2_UP	18	0.600463	1.61936	0.0197327	tags=28%, list=3%, signal=27%	BHLHE40/DDIT3/DNAJB1/SKIL/ID1
WIERENGA_STAT5A_TARGETS_GROUP2	WIERENGA_STAT5A_TARGETS_GROUP2	51	0.475075	1.6191	0.00778701	tags=20%, list=12%, signal=17%	CXCL8/BHLHE40/RNF217/BTG2/KLF6/NFIL3/CKAP4/COL6A1/KLF2/CCL5
WIEDERSCHAIN_TARGETS_OF_BMI1_AND_PCGF2	WIEDERSCHAIN_TARGETS_OF_BMI1_AND_PCGF2	56	0.467523	1.61908	0.00825063	tags=32%, list=17%, signal=27%	JUN/ADM/EDN1/BCL7A/SAFB2/BMP1/FOSL1/MICALL1/NET1/GADD45A/ITGA3/DNMT3B/RREB1/CAV1/MICB/AXL/FAM43A/PAPPA
PASINI_SUZ12_TARGETS_DN	PASINI_SUZ12_TARGETS_DN	302	0.370644	1.61855	4.61826e-05	tags=30%, list=19%, signal=25%	DUSP1/IER3/JUN/BHLHE40/DUSP6/HBEGF/CCN1/PHLDA1/MMP14/SPSB1/ACTA1/METRNL/SFN/COL3A1/ZYX/SAMD4A/SKIL/BMP1/TUBA1A/SHB/IGFBP4/SLC25A24/BTG2/CSF1/CSRP1/BAZ1A/KLF6/PLK2/MSN/CMTM3/PITX2/MYC/ERRFI1/TTYH3/IRS1/CSNK1G1/WNK1/SERPINH1/PROM1/DUSP14/CMTM7/LRP8/PDLIM7/DYRK2/LTB/TPM2/ITGA3/CCN4/PPP1R18/ABTB2/WWTR1/PHIP/ADK/APP/FLRT3/WNT4/VGLL3/MYADM/GNG2/AKT1/UBE2E1/PIK3R3/PDGFB/PRTG/TIMP2/FN1/BACH2/RPS6KA3/CD27…
WHITE_NEUROBLASTOMA_WITH_1P36.3_DELETION	WHITE_NEUROBLASTOMA_WITH_1P36.3_DELETION	19	0.589677	1.61683	0.00893996	tags=42%, list=13%, signal=36%	KLHL21/PHF13/TNFRSF25/DNAJC11/ICMT/RNF207/RPL22/AJAP1
FRASOR_RESPONSE_TO_ESTRADIOL_DN	FRASOR_RESPONSE_TO_ESTRADIOL_DN	72	0.446249	1.61602	0.00499118	tags=31%, list=18%, signal=25%	DUSP1/IER3/ABCC5/KLF6/PLK2/SMAD3/LHFPL2/FOLH1/TTC9/ALDH4A1/DDIT4/MYO1B/EFNA1/INSIG2/LAMB1/EPOR/TM4SF1/BMP4/BAK1/PXDN/NELL2/STXBP1
WP_MYOMETRIAL_RELAXATION_AND_CONTRACTION_PATHWAYS	WP_MYOMETRIAL_RELAXATION_AND_CONTRACTION_PATHWAYS	154	0.393194	1.61589	0.00180261	tags=27%, list=19%, signal=22%	FOS/JUN/ATF3/IL6/ADM/ATP2A2/RGS19/YWHAE/ACTA1/SFN/IL1B/IGFBP4/RGS3/ARRB2/RGS10/ATF6B/ADCY6/PRKCH/ATP2A3/CAMK2G/CALM1/MYL4/ADCY9/GNG8/GNG2/PRKAR1B/ARRB1/GRK4/IGFBP2/PRKCB/ADCY1/RYR2/LPAR1/YWHAZ/ACTC1/GNAS/GRK6/ADCY8/ATF1/RGS6/PDE4D/OXT
SMIRNOV_RESPONSE_TO_IR_6HR_DN	SMIRNOV_RESPONSE_TO_IR_6HR_DN	108	0.416396	1.61505	0.00259789	tags=30%, list=16%, signal=25%	EGR1/TNF/IER2/ZFP36/SIPA1/TPX2/KLF6/UBE2S/MYC/ZNF318/CLEC2D/CCL4/KIF23/SLC19A1/CD22/TRAF5/ATP2A3/CCNG2/KCTD12/KLF2/ARHGAP11A/POLR3G/H1-0/LPCAT4/GPR18/INSIG2/LDLR/HK2/RNASE6/TLE3/LTA/TRIB1
BIOCARTA_ATM_PATHWAY	BIOCARTA_ATM_PATHWAY	18	0.598711	1.61464	0.0202486	tags=17%, list=1%, signal=16%	JUN/NFKBIA/ATM
LUND_SILENCED_BY_METHYLATION	LUND_SILENCED_BY_METHYLATION	15	0.623656	1.61383	0.0187982	tags=53%, list=18%, signal=44%	HES1/SDC4/AMD1/RNF4/MAP1LC3A/HMOX1/TIMP2/TMEM101
REACTOME_NEUROTOXICITY_OF_CLOSTRIDIUM_TOXINS	REACTOME_NEUROTOXICITY_OF_CLOSTRIDIUM_TOXINS	10	0.699619	1.61375	0.0123163	tags=60%, list=20%, signal=48%	SV2A/STX1A/SYT2/VAMP1/SYT1/STX1B
KEGG_CIRCADIAN_RHYTHM_MAMMAL	KEGG_CIRCADIAN_RHYTHM_MAMMAL	13	0.6461	1.613	0.0283527	tags=23%, list=3%, signal=22%	BHLHE40/CSNK1E/CRY1
REACTOME_CIRCADIAN_CLOCK	REACTOME_CIRCADIAN_CLOCK	69	0.449687	1.6127	0.00384048	tags=22%, list=6%, signal=21%	BHLHE40/CSNK1E/SERPINE1/SIK1/NCOA1/CRTC1/TBL1XR1/CRY1/NFIL3/PPP1CA/RAI1/EP300/PPARA/CRTC2/SREBF1
HINATA_NFKB_TARGETS_KERATINOCYTE_UP	HINATA_NFKB_TARGETS_KERATINOCYTE_UP	81	0.437749	1.6123	0.0046147	tags=22%, list=12%, signal=20%	TNF/CXCL8/IL6/NFKBIA/ARHGDIA/MMP14/SERPINE1/IL1B/TNC/PNRC1/TNFAIP8/GADD45A/SPRR1B/IL32/MT3/STAT5A/EFNA1/CCL5
FRASOR_TAMOXIFEN_RESPONSE_UP	FRASOR_TAMOXIFEN_RESPONSE_UP	50	0.473804	1.6118	0.0120393	tags=36%, list=20%, signal=29%	IER3/BHLHE40/LSS/SLC25A1/RGS3/CDK18/UPF1/RAB30/WNT4/KLC1/CD44/FARP1/YWHAZ/CPM/SRD5A1/LASP1/IL13RA1/MSH2
QI_HYPOXIA_TARGETS_OF_HIF1A_AND_FOXA2	QI_HYPOXIA_TARGETS_OF_HIF1A_AND_FOXA2	32	0.512268	1.61142	0.0167224	tags=41%, list=14%, signal=35%	SRM/ATN1/MED15/RNF126/DUSP10/COL6A2/TLE5/BCL2L1/NGF/CNOT3/MYBBP1A/HK1/TRPC4AP
CHANDRAN_METASTASIS_TOP50_UP	CHANDRAN_METASTASIS_TOP50_UP	35	0.500591	1.61005	0.0199392	tags=40%, list=16%, signal=34%	NUFIP2/GRINA/GIT1/CBX4/KMT2E/HSP90AA1/AK4/JPT1/GRB2/PCBP2/LARP1/DDX17/SOD1/ENTR1
VERRECCHIA_RESPONSE_TO_TGFB1_C4	VERRECCHIA_RESPONSE_TO_TGFB1_C4	11	0.678043	1.60932	0.0153069	tags=64%, list=22%, signal=50%	MTA1/MMP17/TNC/EPHB2/LAMB1/PAK2/THBS2
BROWNE_HCMV_INFECTION_20HR_UP	BROWNE_HCMV_INFECTION_20HR_UP	227	0.375335	1.60894	0.000257974	tags=29%, list=17%, signal=24%	HES1/SH2B2/ARHGAP44/ATXN2L/SULT1A2/RNF19B/FURIN/ATRN/NFKB2/CLUH/FXR2/NFATC3/GBF1/MAP3K3/SAFB2/ELK4/RNF126/GAS7/CBX4/UBE3A/PTPRE/DNAJA1/RNF40/UBE2S/TRIM21/CDK2AP2/ERF/PPARA/DOHH/NACAD/CDK20/CCDC181/PIP5K1B/AKAP8L/PTPRB/EED/DFFB/OGFR/GAB1/SMARCD2/SLC6A8/AHCTF1/USP6/KHDRBS3/CBARP/CDC34/SLC22A5/TEX30/PCDH9/DUSP8/TRIM33/DPAGT1/PLAGL2/PLCL1/UBE2H/DUSP7/THOC1/HSPA2/IGFBP2/SLC6A6/HUS1/RAP2A/FRRS1L/HCN2/P…
ACEVEDO_LIVER_CANCER_DN	ACEVEDO_LIVER_CANCER_DN	496	0.352764	1.60875	1.60525e-06	tags=25%, list=19%, signal=21%	EGR1/FOS/IER3/BHLHE40/CSRNP1/FOSB/ADM/PPP1R15A/CCN1/ZFP36/FAAH/UBALD1/DUSP5/NFKBIA/PHLDA1/SERTAD1/EPHA2/MT2A/MT1A/TOR3A/PTMS/FURIN/RETSAT/HAMP/CLUH/LY6E/SERPINE1/ZSWIM8/VAV2/ARFGAP1/MT1X/SAMD4A/VPS37B/NDRG2/IGFBP4/CYGB/DYNC1H1/POLE/SDC4/LTBR/DNAJA1/TRIR/GSDMB/TP53INP1/PHF13/TRIP6/LRP5/PCOLCE/TOLLIP/DCUN1D3/KIAA2013/NDEL1/CHCHD10/NAP1L4/SAP18/F8A1/ATG101/FAM160A2/MICU1/ZCCHC14/CALM1/F7/PRKAG2/KIF1…
NAKAMURA_ADIPOGENESIS_EARLY_UP	NAKAMURA_ADIPOGENESIS_EARLY_UP	59	0.458722	1.6086	0.00528651	tags=31%, list=15%, signal=26%	ZFP36/MT1H/PDE6H/MT1E/PDE10A/NFIL3/PPP1CA/PIK3R1/MYC/SMARCD2/FAM174C/MT1F/GAS1/MYADM/S1PR3/DKK1/MT1M/MT1G
WP_MAMMARY_GLAND_DEVELOPMENT_PATHWAY_EMBRYONIC_DEVELOPMENT_STAGE_1_OF_4	WP_MAMMARY_GLAND_DEVELOPMENT_PATHWAY_EMBRYONIC_DEVELOPMENT_STAGE_1_OF_4	17	0.606396	1.60797	0.0185068	tags=24%, list=12%, signal=21%	TNF/MYC/TERT/AKT1
FISCHER_DIRECT_P53_TARGETS_META_ANALYSIS	FISCHER_DIRECT_P53_TARGETS_META_ANALYSIS	290	0.368864	1.60764	0.000130467	tags=20%, list=11%, signal=18%	IER3/BHLHE40/ATF3/GDF15/HES1/ASTN2/BAX/SERTAD1/EPHA2/APAF1/TMEM63B/BCL9L/RNF19B/RETSAT/SERPINE1/MLF2/PPM1D/SLC30A1/SFN/ZNF385A/BTG2/CSF1/PIDD1/PLK2/SAC3D1/TP53INP1/MICALL1/SLC12A4/TRIP6/WDR81/PANK1/BCL6/PRKD2/CPEB2/CSNK1G1/SMAD3/UQCC1/DGKA/DUSP14/SESN2/GPC1/TNFAIP8/GADD45A/RIN1/TNFRSF10B/ITGA3/CDC42SE1/BCL2L1/GABARAPL2/RCBTB1/GRHL3/FAM210B/FAS/GCH1/RFK/CLP1/TRUB1/NYNRIN
ELLWOOD_MYC_TARGETS_UP	ELLWOOD_MYC_TARGETS_UP	13	0.643809	1.60728	0.0288729	tags=38%, list=9%, signal=35%	RGS19/LY6H/CCDC93/DPP7/PPP1R18
BLANCO_MELO_COVID19_SARS_COV_2_POS_PATIENT_LUNG_TISSUE_DN	BLANCO_MELO_COVID19_SARS_COV_2_POS_PATIENT_LUNG_TISSUE_DN	171	0.387154	1.60715	0.000521591	tags=29%, list=23%, signal=23%	FOS/SIN3B/MAFG/LETM1/AKAP17A/ZSWIM8/SFN/MADD/SMTN/RASSF1/NDST1/FAM118A/MAF1/SEMA3F/MPHOSPH10/GAS6/ADCY6/ENTPD6/SLC25A29/MICAL3/CYP1A1/DCHS1/PLEKHM1/ILVBL/INPP5A/FAM160B2/XAB2/DTX4/TBCD/ZSCAN18/ENTR1/SMPD4/GLT8D1/DOCK6/SH3PXD2B/CFAP20/SLC9A1/HMCES/PODXL/EXOSC7/SPHK1/TCERG1/MRTFA/STC1/STARD10/RSAD1/ARHGAP10/METTL3/SGSM3/ITPR1
VALK_AML_WITH_EVI1	VALK_AML_WITH_EVI1	23	0.558027	1.60648	0.0255395	tags=35%, list=17%, signal=29%	SPRY1/ADGRL1/RBPMS/SMAGP/CD34/NPDC1/SORBS3/PXDN
REACTOME_SIGNALING_BY_SCF_KIT	REACTOME_SIGNALING_BY_SCF_KIT	43	0.482215	1.60577	0.0161972	tags=28%, list=13%, signal=24%	SH2B2/GRB7/SOS1/SRC/CBL/LCK/PIK3R1/GAB2/STAT5B/GRB2/STAT5A/PIK3R3
BIOCARTA_CDK5_PATHWAY	BIOCARTA_CDK5_PATHWAY	12	0.660324	1.60566	0.0161703	tags=17%, list=1%, signal=16%	EGR1/MAP2K2
WP_MAPK_CASCADE	WP_MAPK_CASCADE	32	0.510371	1.60545	0.0169777	tags=19%, list=2%, signal=18%	JUN/MAP2K2/SOS1/MAP3K3/SIPA1/MAP2K7
REACTOME_CELLULAR_SENESCENCE	REACTOME_CELLULAR_SENESCENCE	182	0.384978	1.60496	0.000764007	tags=25%, list=15%, signal=21%	FOS/JUN/CXCL8/IL6/HMGA1/ATM/TERF2/EHMT2/MAP2K7/ANAPC11/H2BC11/ID1/CBX4/ANAPC2/UBE2S/MAPK7/ERF/SCMH1/PHC3/ACD/ANAPC15/EED/UBN1/H2BC14/CDKN2D/H2AX/CBX8/MINK1/H2BC3/TERF2IP/ANAPC1/H1-0/TNRC6C/TERF1/UBE2E1/MAP3K5/RPS6KA2/H2BC17/LMNB1/H3C1/PHC1/AGO4/MAP2K3/CCNA2/RPS6KA3
BIOCARTA_HSP27_PATHWAY	BIOCARTA_HSP27_PATHWAY	14	0.630922	1.60467	0.0253282	tags=43%, list=10%, signal=39%	TNF/APAF1/ACTA1/BCL2/HSPB2/FAS
PID_TGFBR_PATHWAY	PID_TGFBR_PATHWAY	52	0.467701	1.60449	0.00538092	tags=27%, list=11%, signal=24%	PPP1R15A/SMAD7/YWHAE/SOS1/SKIL/FKBP1A/PPP1CA/ARRB2/SMAD3/TAB1/RNF111/GRB2/PPP2CA/PPP2R2A
WELCSH_BRCA1_TARGETS_DN	WELCSH_BRCA1_TARGETS_DN	138	0.398071	1.60204	0.00120705	tags=22%, list=14%, signal=19%	DUSP1/PRRC2A/SNRNP70/PKN1/CTPS1/BMS1/NUP188/SLC29A1/SRM/DNAJC7/SEC24C/DDX10/MYC/CKAP4/MCM2/SLC19A1/KDM5C/RCC1/DDX11/SLC6A8/U2AF1/MLEC/RXRA/MOGS/UBAP2L/RPIA/SLC39A7/FASN/MCL1/HK1
REACTOME_REGULATION_OF_MECP2_EXPRESSION_AND_ACTIVITY	REACTOME_REGULATION_OF_MECP2_EXPRESSION_AND_ACTIVITY	32	0.509213	1.60181	0.0174883	tags=50%, list=24%, signal=38%	NCOR2/TBL1XR1/GPS2/CAMK4/CAMK2G/CALM1/TNRC6C/HIPK2/NCOR1/AGO4/TNRC6A/MECP2/HTT/AURKB/TNRC6B/MOV10
WP_LNCRNA_INVOLVEMENT_IN_CANONICAL_WNT_SIGNALING_AND_COLORECTAL_CANCER	WP_LNCRNA_INVOLVEMENT_IN_CANONICAL_WNT_SIGNALING_AND_COLORECTAL_CANCER	97	0.420878	1.60116	0.00348672	tags=25%, list=15%, signal=21%	JUN/ATF3/CSNK1E/SENP2/WIF1/CXXC4/FOSL1/MYC/LRP5/DVL1/FRAT1/FZD5/WNT5B/DVL3/WNT10A/WNT4/NKD2/CHD8/CSNK2A1/GSK3B/DKK1/CTNNBIP1/TCF7L1/DKK2
WP_PREIMPLANTATION_EMBRYO	WP_PREIMPLANTATION_EMBRYO	56	0.462222	1.60073	0.00885285	tags=9%, list=1%, signal=9%	EGR1/FOSB/DDIT3/ZFP36/HMGA1
PID_ANTHRAX_PATHWAY	PID_ANTHRAX_PATHWAY	16	0.612357	1.60063	0.0188308	tags=31%, list=3%, signal=30%	TNF/MAP2K2/IL1B/MAP2K7/NLRP1
REACTOME_ACTIVATION_OF_BAD_AND_TRANSLOCATION_TO_MITOCHONDRIA	REACTOME_ACTIVATION_OF_BAD_AND_TRANSLOCATION_TO_MITOCHONDRIA	15	0.618513	1.60052	0.0216503	tags=60%, list=23%, signal=46%	YWHAE/SFN/BCL2/AKT1/PPP3R1/YWHAZ/AKT3/BID/AKT2
WANG_RESPONSE_TO_GSK3_INHIBITOR_SB216763_DN	WANG_RESPONSE_TO_GSK3_INHIBITOR_SB216763_DN	336	0.361237	1.59999	3.82726e-05	tags=23%, list=17%, signal=20%	EGR1/FOS/TNF/DUSP6/SLCO4A1/UBALD1/SLC38A2/JADE2/ARHGAP44/PHLDA1/CTPS1/LY6E/MCM4/IGFBP4/MATK/HELLS/PSMC3IP/GOLGA8IP/PTPRE/UHRF1/DNAJA1/MSN/FEN1/MYC/GPT2/PKMYT1/TIPARP/MAF1/HSP90AA1/EIF5AL1/ETV4/MOCS3/FADS2/MCM5/KIF23/MCM2/LRP8/POLA1/H2BC14/TSFM/APBB1/PPP1R27/TWNK/ATG101/SQLE/H2AX/H2BC3/SEH1L/DSCC1/KNOP1/PIM2/DCTPP1/TEX30/AHSA1/DKC1/CABLES1/ORC6/ARRB1/LDLR/FASN/CYTIP/PIM1/MELK/PTPN7/LYAR/CCNA2/SLC6…
LUI_THYROID_CANCER_CLUSTER_1	LUI_THYROID_CANCER_CLUSTER_1	49	0.471372	1.5997	0.00749238	tags=31%, list=14%, signal=26%	DUSP6/HES1/FOSB/SPRY1/MDK/BTG2/GAS6/TNFRSF10B/AP1G2/PHIP/ADCY9/ST3GAL5/RUBCN/EPOR/PLD3
PID_IL12_STAT4_PATHWAY	PID_IL12_STAT4_PATHWAY	30	0.518898	1.59804	0.0165518	tags=7%, list=0%, signal=7%	FOS/JUN
HOFFMANN_SMALL_PRE_BII_TO_IMMATURE_B_LYMPHOCYTE_UP	HOFFMANN_SMALL_PRE_BII_TO_IMMATURE_B_LYMPHOCYTE_UP	63	0.453404	1.5967	0.00461432	tags=22%, list=8%, signal=20%	HES1/SIPA1/ZNF385A/MFHAS1/MAPK8IP3/SDC4/LY6H/SEMA4D/RBMS2/VEGFB/LTB/HLA-DRB1/CD22/XPO1
WP_PDGFRBETA_PATHWAY	WP_PDGFRBETA_PATHWAY	28	0.529407	1.59596	0.0129426	tags=32%, list=15%, signal=27%	FOS/JUN/SOS1/PIK3R1/STAT5B/GRB2/STAT5A/RASA1/PRKCB
YIH_RESPONSE_TO_ARSENITE_C4	YIH_RESPONSE_TO_ARSENITE_C4	17	0.601819	1.59583	0.021354	tags=24%, list=9%, signal=21%	JUN/CXCL8/TAPBP/GRB2
NAKAMURA_ADIPOGENESIS_EARLY_DN	NAKAMURA_ADIPOGENESIS_EARLY_DN	33	0.503098	1.59553	0.0179072	tags=12%, list=1%, signal=12%	GDF15/IER2/CCN1/SERPINE1
SCIBETTA_KDM5B_TARGETS_UP	SCIBETTA_KDM5B_TARGETS_UP	19	0.581396	1.59412	0.0097008	tags=37%, list=8%, signal=34%	DDIT3/CLCF1/MAPK8IP3/RNF40/SMOX/CDIPT/GADD45A
PID_HIV_NEF_PATHWAY	PID_HIV_NEF_PATHWAY	32	0.50671	1.59394	0.019786	tags=38%, list=14%, signal=32%	TNF/NFKBIA/APAF1/MAP2K7/TRAF2/BCL2/TRADD/DFFB/FAS/TNFRSF1A/MAP3K5/BIRC3
BIOCARTA_AGR_PATHWAY	BIOCARTA_AGR_PATHWAY	33	0.502505	1.59365	0.0181612	tags=21%, list=5%, signal=20%	JUN/AGRN/ARHGEF6/ACTA1/CTTN/PAK4/DVL1
REACTOME_TP53_REGULATES_TRANSCRIPTION_OF_DNA_REPAIR_GENES	REACTOME_TP53_REGULATES_TRANSCRIPTION_OF_DNA_REPAIR_GENES	57	0.458359	1.59326	0.00654323	tags=30%, list=16%, signal=25%	FOS/JUN/ATM/NELFB/GTF2F2/SUPT5H/CTDP1/POLR2J/POLR2C/CCNK/POLR2B/ATR/POLR2A/GTF2H4/CDK12/SUPT4H1/CDK13
BLANCO_MELO_COVID19_SARS_COV_2_INFECTION_CALU3_CELLS_UP	BLANCO_MELO_COVID19_SARS_COV_2_INFECTION_CALU3_CELLS_UP	297	0.365183	1.59264	8.09878e-05	tags=9%, list=4%, signal=9%	EGR1/DUSP1/CXCL2/TNF/JUN/CXCL8/ATF3/IL6/HBEGF/CSRNP1/FOSB/NAV3/PPP1R15A/NUAK2/ZFP36/SPRY2/NFKBIA/KLF10/MT2A/SERPINE1/IL1B/NLRP1/PLA1A/CSF1/KLF6/TRIM21
MURAKAMI_UV_RESPONSE_1HR_DN	MURAKAMI_UV_RESPONSE_1HR_DN	10	0.69033	1.59233	0.0142034	tags=20%, list=0%, signal=20%	EGR1/IL6
REACTOME_ACTIVATION_OF_GENE_EXPRESSION_BY_SREBF_SREBP	REACTOME_ACTIVATION_OF_GENE_EXPRESSION_BY_SREBF_SREBP	37	0.495547	1.59199	0.0190526	tags=35%, list=16%, signal=30%	MVD/NCOA1/LSS/TBL1XR1/NFYC/PPARA/SREBF1/SQLE/RXRA/ACACB/NCOA6/FASN/MVK
REACTOME_ESR_MEDIATED_SIGNALING	REACTOME_ESR_MEDIATED_SIGNALING	199	0.378225	1.59152	0.000675476	tags=24%, list=17%, signal=20%	FOS/JUN/HBEGF/FOSB/GNAI2/KDM4B/SRC/NCOA1/USF2/H2BC11/SMC1A/CBFB/GTF2F2/PIK3R1/MYC/EP300/HSP90AA1/BCL2/HSP90AB1/SMC3/POU2F1/H2BC14/XPO1/KANK1/POLR2J/H2AX/CALM1/PRMT1/H2BC3/FOXA1/IGF1R/GNG8/GNG2/TNRC6C/POLR2C/S1PR3/AKT1/PIK3R3/H2BC17/POLR2B/POLR2A/H3C1/AGO4/TLE3/CAV1/TFF3/H4C1/TNRC6A
WP_SIMPLIFIED_DEPICTION_OF_MYD88_DISTINCT_INPUTOUTPUT_PATHWAY	WP_SIMPLIFIED_DEPICTION_OF_MYD88_DISTINCT_INPUTOUTPUT_PATHWAY	17	0.600152	1.59141	0.0218717	tags=6%, list=0%, signal=6%	JUN
DACOSTA_UV_RESPONSE_VIA_ERCC3_XPCS_DN	DACOSTA_UV_RESPONSE_VIA_ERCC3_XPCS_DN	81	0.431823	1.59047	0.00643937	tags=28%, list=18%, signal=23%	IL6/BICD1/NAV3/DUSP5/ARAP2/ATRN/PIK3C2A/NFATC3/PHF14/MTAP/MYO9B/ATP8B1/AGFG1/IGF1R/ADCY9/TERF1/DKK1/RPS6KA3/GPATCH8/UBXN7/HERC4/ASXL1/HEG1
SHEPARD_CRASH_AND_BURN_MUTANT_UP	SHEPARD_CRASH_AND_BURN_MUTANT_UP	195	0.377836	1.58993	0.000603629	tags=20%, list=13%, signal=18%	EGR1/FOS/JUN/JUNB/ATF3/HES1/CCN1/DUSP5/BAX/CYP24A1/PFKFB3/BTG2/SPIDR/TP53INP1/PTGES2/NMRK2/KLF11/CIC/HSP90AA1/SERPINH1/CYP26A1/CHCHD10/AK4/TSFM/CCNG2/PTP4A3/IMPDH1/EIF6/DDX51/NSUN2/TOB1/MRPL12/KLF2/MRPS18B/BRF1/RRP9/MYBBP1A/GAR1/KRT17
SCHLOSSER_SERUM_RESPONSE_UP	SCHLOSSER_SERUM_RESPONSE_UP	122	0.401976	1.58826	0.00252285	tags=30%, list=17%, signal=25%	EGR1/KMT2B/CBFA2T3/N4BP2L2/KDM4B/UBA1/SIPA1/RPRD2/PTK2B/ZBTB7A/WIPF2/KIFC1/MYO9B/PCOLCE/BCL2/RHOG/TAPBP/AP1S1/LTB/ARHGAP25/GAB1/STXBP2/SPTAN1/CNOT3/ICAM3/CHD8/KLF12/CEP350/RALY/DCAF7/CSNK1G2/MAP3K11/PITPNM1/BTF3/SCAND2P/UGT1A10
REACTOME_CHEMOKINE_RECEPTORS_BIND_CHEMOKINES	REACTOME_CHEMOKINE_RECEPTORS_BIND_CHEMOKINES	53	0.462561	1.58775	0.0147623	tags=6%, list=1%, signal=6%	CXCL2/CXCL8/CXCL1
CLASPER_LYMPHATIC_VESSELS_DURING_METASTASIS_UP	CLASPER_LYMPHATIC_VESSELS_DURING_METASTASIS_UP	20	0.5713	1.58699	0.0221688	tags=45%, list=14%, signal=39%	ADM/SPRY1/EDN1/TNC/NECTIN2/ENG/AJUBA/PDGFB/PIM1
SCHLOSSER_SERUM_RESPONSE_AUGMENTED_BY_MYC	SCHLOSSER_SERUM_RESPONSE_AUGMENTED_BY_MYC	100	0.416448	1.58689	0.00336952	tags=41%, list=21%, signal=32%	YWHAE/ARHGDIA/MLF2/NCOR2/PKD1/PKM/SUPT6H/LCK/CLPTM1/MAZ/UBE2S/RBM42/RNH1/SUPT5H/LSM12/KDM5C/TMED9/OGFR/GLS2/TFF2/NFATC2IP/PPP2R1A/RGP1/STK11/CSNK2A1/IGFBP2/NDUFV1/OTUB1/DNPH1/BDKRB2/JTB/TMEM109/MED24/OSM/MRPL58/AIP/POMK/CSNK2B/RAD54L2/AURKB/RER1
WP_AMYOTROPHIC_LATERAL_SCLEROSIS_ALS	WP_AMYOTROPHIC_LATERAL_SCLEROSIS_ALS	37	0.493813	1.58642	0.0195641	tags=38%, list=17%, signal=31%	TNF/BAX/APAF1/MAP2K2/BCL2/BCL2L1/CST3/TNFRSF1A/MAP3K5/SOD1/CASP12/NEFH/CASP9/MAPK14
REACTOME_HEME_SIGNALING	REACTOME_HEME_SIGNALING	45	0.472601	1.58585	0.0123242	tags=33%, list=14%, signal=29%	NCOA1/CRTC1/TBL1XR1/RAI1/EP300/PPARA/CRTC2/BACH1/XPO1/RXRA/MAFK/SLC46A1/NCOA6/HMOX1/NCOR1
QI_PLASMACYTOMA_DN	QI_PLASMACYTOMA_DN	90	0.418923	1.58528	0.00582477	tags=34%, list=21%, signal=27%	BSG/SENP2/MAGED1/SVIL/C1QBP/SKIL/BMP1/MATK/COL6A2/MYC/IPO4/TRIP6/PRMT7/ETV4/CLIP1/EPCAM/SEC63/TBRG4/AJUBA/MYBBP1A/LAMB1/CYTIP/TRIB1/ST14/MFAP2/SPARCL1/FIGLA/CTSW/CCL11/XBP1/GNE
REACTOME_REGULATION_OF_KIT_SIGNALING	REACTOME_REGULATION_OF_KIT_SIGNALING	16	0.606421	1.58512	0.0211684	tags=38%, list=9%, signal=34%	SH2B2/SOS1/SRC/CBL/LCK/GRB2
SEITZ_NEOPLASTIC_TRANSFORMATION_BY_8P_DELETION_DN	SEITZ_NEOPLASTIC_TRANSFORMATION_BY_8P_DELETION_DN	30	0.514626	1.58488	0.0186047	tags=30%, list=17%, signal=25%	L1CAM/PHF1/CLIP2/SCG5/DDIT4/PIK3CD/UBXN7/SLC19A2/PXDN
CHIARADONNA_NEOPLASTIC_TRANSFORMATION_KRAS_CDC25_DN	CHIARADONNA_NEOPLASTIC_TRANSFORMATION_KRAS_CDC25_DN	52	0.461913	1.58463	0.00658571	tags=12%, list=5%, signal=11%	FOS/CXCL2/ZFP36/MAGED1/LY6H/TNC
YAO_TEMPORAL_RESPONSE_TO_PROGESTERONE_CLUSTER_14	YAO_TEMPORAL_RESPONSE_TO_PROGESTERONE_CLUSTER_14	137	0.394689	1.58433	0.00213703	tags=35%, list=21%, signal=28%	GSTM1/BAX/RGS19/ARHGDIA/GATAD2A/JAG2/ACTA1/PKM/CS/TUBA1A/IPO4/BANF1/SLAIN1/CLPTM1L/EIF4G1/ATF6B/SERPINH1/GALM/PTP4A3/SRSF1/DVL3/PRMT1/NSUN2/DCTPP1/MRPL12/MLEC/MRPS18B/CCT3/SLC39A7/TMEM14C/PDIA4/PSMD6/GGA1/SEC13/ERGIC1/IRAK1/PKDCC/HTRA2/TBCB/THOP1/CCT8/DDX41/TCERG1/PSMD1/TMEM147/GORASP2/TYMS/DTYMK
RAMASWAMY_METASTASIS_UP	RAMASWAMY_METASTASIS_UP	64	0.448069	1.58319	0.00483982	tags=42%, list=24%, signal=32%	VAV2/RBM42/ARPP19/UBN1/PRMT1/BPTF/UPF2/TDG/COX7A2L/PSEN2/ELF4/ETV2/PFDN6/FASN/TENT4A/LMNB1/SPEN/COL1A2/GPI/MSX2/HNRNPAB/RALGPS1/KPNA6/TMEM147/MAD2L1/RAB5C/SRGAP2
WP_NONGENOMIC_ACTIONS_OF_125_DIHYDROXYVITAMIN_D3	WP_NONGENOMIC_ACTIONS_OF_125_DIHYDROXYVITAMIN_D3	69	0.441183	1.5822	0.00580534	tags=9%, list=2%, signal=9%	TNF/JUN/CXCL8/IL6/NFKB2/CYP24A1
PID_SYNDECAN_4_PATHWAY	PID_SYNDECAN_4_PATHWAY	32	0.502684	1.58127	0.0228496	tags=34%, list=15%, signal=29%	MDK/SDC4/ADAM12/DNM2/TNC/NUDT16L1/GIPC1/FGF6/CCL5/F2/FN1
REACTOME_TP53_REGULATES_TRANSCRIPTION_OF_CELL_DEATH_GENES	REACTOME_TP53_REGULATES_TRANSCRIPTION_OF_CELL_DEATH_GENES	42	0.478507	1.58035	0.02229	tags=26%, list=10%, signal=24%	BAX/APAF1/ATM/RABGGTB/TP53AIP1/PIDD1/TP53INP1/BCL6/TP63/TNFRSF10B/FAS
WP_ALPHA_6_BETA_4_SIGNALING_PATHWAY	WP_ALPHA_6_BETA_4_SIGNALING_PATHWAY	32	0.502309	1.58009	0.0228496	tags=53%, list=23%, signal=41%	SOS1/SRC/PIK3R1/IRS1/GAB1/GRB2/AKT1/LAMB1/MAPK14/EIF4EBP1/ITGB4/ITGA6/LAMB3/MAPK1/SHC1/LAMA3/PRKCD
WP_IL6_SIGNALING_PATHWAY	WP_IL6_SIGNALING_PATHWAY	41	0.476568	1.57996	0.0209302	tags=29%, list=13%, signal=26%	JUNB/IL6/MAP2K2/SOS1/SOCS3/NCOA1/PIK3R1/GAB1/BCL2L1/GRB2/AKT1/GSK3B
REACTOME_EGFR_DOWNREGULATION	REACTOME_EGFR_DOWNREGULATION	28	0.524057	1.57984	0.0156597	tags=21%, list=9%, signal=20%	HBEGF/SPRY1/SPRY2/CBL/PTPN3/GRB2
PID_AURORA_A_PATHWAY	PID_AURORA_A_PATHWAY	30	0.512893	1.57955	0.0201444	tags=40%, list=13%, signal=35%	NFKBIA/GIT1/CPEB1/TACC3/PPP2R5D/TPX2/NDEL1/GADD45A/AKT1/AJUBA/RASA1/GSK3B
TSAI_RESPONSE_TO_IONIZING_RADIATION	TSAI_RESPONSE_TO_IONIZING_RADIATION	140	0.390208	1.57891	0.00322887	tags=24%, list=16%, signal=21%	JUNB/DUSP6/GDF15/HBEGF/DDIT3/NFKBIA/NFKB2/PPM1D/SIPA1/ADGRB3/BTG2/TGIF1/MYC/EP300/SMAD3/CCL4/NFE2L1/TNFAIP8/CCNG2/PRMT1/FAS/MAP7/STAT5A/COL6A1/DKC1/AKAP5/TSC22D3/PLAGL2/CCNK/BIRC3/FN1/TLE3/PKD2L1/AXL
CAMPS_COLON_CANCER_COPY_NUMBER_UP	CAMPS_COLON_CANCER_COPY_NUMBER_UP	88	0.419978	1.57853	0.0038482	tags=22%, list=15%, signal=18%	DUSP1/MAFG/ANKRD10/PYCR1/MPRIP/ANAPC11/TOP3A/TRAF7/EIF1/UPF1/FSTL3/RXRA/MAFK/PANK4/SIRT7/KAZN/MIEF2/HJV/BRSK2
SCHAVOLT_TARGETS_OF_TP53_AND_TP63	SCHAVOLT_TARGETS_OF_TP53_AND_TP63	15	0.610011	1.57852	0.0278807	tags=33%, list=10%, signal=30%	BAX/EPHA2/SFN/PIDD1/FAS
NIKOLSKY_MUTATED_AND_AMPLIFIED_IN_BREAST_CANCER	NIKOLSKY_MUTATED_AND_AMPLIFIED_IN_BREAST_CANCER	90	0.416688	1.57682	0.00599921	tags=30%, list=15%, signal=26%	RCE1/NUFIP2/ZNF707/ATRN/HOXA4/PIGS/POP1/ZNF461/GSDMB/FAM189B/MYO9B/CLPTM1L/ZFP64/UQCC1/RIMS2/DYRK2/FANCA/ZCCHC14/PUS1/RGS22/GRIN2C/CSNK1D/ARRB1/NCOA6/CHD7/GGA3/RADIL
WP_OVARIAN_INFERTILITY_GENES	WP_OVARIAN_INFERTILITY_GENES	31	0.507516	1.57633	0.0113384	tags=19%, list=7%, signal=18%	EGR1/ATM/SYNE2/SMAD3/BMPR1B/DMC1
WP_PATHOGENESIS_OF_SARSCOV2_MEDIATED_BY_NSP9NSP10_COMPLEX	WP_PATHOGENESIS_OF_SARSCOV2_MEDIATED_BY_NSP9NSP10_COMPLEX	20	0.56744	1.57627	0.0237245	tags=20%, list=8%, signal=19%	CXCL8/IL6/LCK/HLA-DRB1
GRAHAM_CML_QUIESCENT_VS_NORMAL_QUIESCENT_DN	GRAHAM_CML_QUIESCENT_VS_NORMAL_QUIESCENT_DN	42	0.47715	1.57587	0.0230456	tags=26%, list=12%, signal=23%	DUSP6/CXCL1/RBPMS/CD52/ADGRG6/PROM1/APP/HLX/PCDH9/H1-0/SPINK2
JIANG_TIP30_TARGETS_UP	JIANG_TIP30_TARGETS_UP	44	0.473807	1.57568	0.0203896	tags=18%, list=5%, signal=17%	DUSP1/IER3/CCN1/NFIL3/MTAP/IRS1/HNMT/BCL6
ACEVEDO_LIVER_TUMOR_VS_NORMAL_ADJACENT_TISSUE_DN	ACEVEDO_LIVER_TUMOR_VS_NORMAL_ADJACENT_TISSUE_DN	251	0.364953	1.57544	0.000236862	tags=16%, list=11%, signal=15%	EGR1/FOS/IER3/BHLHE40/CSRNP1/FOSB/PPP1R15A/FAAH/DUSP5/SERTAD1/EPHA2/MT2A/MT1A/HAMP/CLUH/LY6E/ZSWIM8/MT1X/MAP2K7/VPS37B/NDRG2/GSDMB/RBM25/KRCC1/TRIP6/DCUN1D3/CHPF/LTBP4/KIAA2013/FAM160A2/MBD3/INTS6/ACBD4/MYCBP2/TERF2IP/KAT6A/ARMC6/SEC14L1/PNMA6A/MT1F/ATP6V1B2
KOKKINAKIS_METHIONINE_DEPRIVATION_48HR_UP	KOKKINAKIS_METHIONINE_DEPRIVATION_48HR_UP	118	0.40226	1.57511	0.00275551	tags=17%, list=10%, signal=15%	JUN/CXCL8/IL6/GSTM1/NFKBIA/BAX/APAF1/SMAD7/IL1B/SKIL/BTG2/IRF6/FEN1/HSP90AA1/TRADD/AK4/GADD45A/TNFRSF10B/SPTAN1/FAS
WP_TARGET_OF_RAPAMYCIN_TOR_SIGNALING	WP_TARGET_OF_RAPAMYCIN_TOR_SIGNALING	33	0.496653	1.57509	0.0207012	tags=36%, list=18%, signal=30%	TSC1/FKBP1A/AKT1S1/PRR5/DDIT4/PRKAG2/PRR5L/TSC2/AKT1/PRKAG1/RHEB/EIF4EBP1
FRASOR_RESPONSE_TO_ESTRADIOL_UP	FRASOR_RESPONSE_TO_ESTRADIOL_UP	32	0.500695	1.57501	0.0231049	tags=28%, list=11%, signal=25%	FOS/HOXC4/IGFBP4/EPB41L3/PEG10/CYP1A1/SLC22A5/ADCY9/PTGER3
REACTOME_MYD88_INDEPENDENT_TLR4_CASCADE	REACTOME_MYD88_INDEPENDENT_TLR4_CASCADE	90	0.416066	1.57447	0.00623218	tags=30%, list=20%, signal=24%	FOS/JUN/DUSP6/NFKBIA/NFKB2/MAP2K7/PPP2R5D/MAPK7/MEF2A/TAB1/TRAF3/APP/PPP2CA/NFKBIB/PPP2R1A/RPS6KA2/DUSP7/BIRC3/MAP2K3/RPS6KA3/CUL1/IRAK1/MAPK14/ATF1/RPS27A/FBXW11/HMGB1
WP_RETT_SYNDROME_CAUSING_GENES	WP_RETT_SYNDROME_CAUSING_GENES	48	0.463752	1.5744	0.0110031	tags=42%, list=22%, signal=32%	NCOR2/TBL1XR1/SMC1A/SYNE2/GPS2/SCN1A/GRIN2A/GNAO1/RHOBTB2/HDAC8/GABBR2/XAB2/NCOR1/SRRM3/SATB2/MECP2/STXBP1/HTT/SHANK3/HIVEP2
PID_IL3_PATHWAY	PID_IL3_PATHWAY	26	0.530807	1.57384	0.0237245	tags=54%, list=24%, signal=41%	ID1/PIK3R1/GAB2/STAT5B/BCL2L1/GRB2/IL3/STAT5A/PRKACG/PIM1/YWHAZ/OSM/SHC1/PIK3CA
KUROZUMI_RESPONSE_TO_ONCOCYTIC_VIRUS	KUROZUMI_RESPONSE_TO_ONCOCYTIC_VIRUS	42	0.476309	1.57309	0.0235493	tags=7%, list=2%, signal=7%	CXCL2/TNF/IL1B
SCHRAETS_MLL_TARGETS_UP	SCHRAETS_MLL_TARGETS_UP	32	0.499713	1.57192	0.0236155	tags=25%, list=12%, signal=22%	FOS/CTSZ/CADM1/TNC/CD34/FAS/TOB1/TSPAN7
MACLACHLAN_BRCA1_TARGETS_UP	MACLACHLAN_BRCA1_TARGETS_UP	21	0.559549	1.57099	0.0238071	tags=43%, list=17%, signal=36%	DDIT3/ARHGDIA/IGFBP4/GADD45A/CDC34/COX7A2L/IGFBP2/TIMP2/GAPDH
BIOCARTA_GH_PATHWAY	BIOCARTA_GH_PATHWAY	25	0.53406	1.57046	0.0239423	tags=52%, list=24%, signal=40%	SOS1/PIK3R1/IRS1/STAT5B/GRB2/STAT5A/PRKCB/GHR/MAPK1/SHC1/GH1/PIK3CA/PTPN6
KEGG_GRAFT_VERSUS_HOST_DISEASE	KEGG_GRAFT_VERSUS_HOST_DISEASE	39	0.482379	1.57017	0.0177864	tags=21%, list=11%, signal=18%	TNF/IL6/IL1B/HLA-A/HLA-DRB1/HLA-C/FAS/HLA-B
PID_KIT_PATHWAY	PID_KIT_PATHWAY	52	0.457214	1.56851	0.00779407	tags=29%, list=15%, signal=24%	SH2B2/MAP2K2/SOS1/CBL/MATK/PIK3R1/BCL2/GAB1/GRB2/STAT5A/AKT1/GSK3B/EPOR/CRKL/SPRED2
IVANOVA_HEMATOPOIESIS_STEM_CELL	IVANOVA_HEMATOPOIESIS_STEM_CELL	182	0.376112	1.56799	0.00153556	tags=33%, list=22%, signal=26%	EGR1/JUN/DUSP5/NFKBIA/ETV1/NFIX/SMAD7/GATAD2A/GEM/SOS1/SKIL/REST/SOCS5/SLC23A2/SV2A/MARCHF9/IFT81/SEPTIN3/TSPAN13/ETV3/CD164L2/DNMT3A/DDIT4/ITGA3/MYCBP2/ENG/PPP1R9A/LAPTM4B/HNRNPR/SAMD10/USP34/NRXN1/ZXDB/LRRTM4/ZC2HC1A/PDC/PYGM/POLR2A/KLHL26/RFPL4B/LYPD1/RPS6KA3/SMC5/INPPL1/NTRK3/WWC2/SIAH2/MYO10/VPS37A/PGLYRP2/PLAC8L1/MSI2/KIF5A/ARHGAP32/FAM110B/SCAF11/SGSM1/MEX3A/ROBO4/MAFF
REACTOME_SENESCENCE_ASSOCIATED_SECRETORY_PHENOTYPE_SASP	REACTOME_SENESCENCE_ASSOCIATED_SECRETORY_PHENOTYPE_SASP	101	0.410871	1.56767	0.00456316	tags=22%, list=15%, signal=19%	FOS/JUN/CXCL8/IL6/EHMT2/ANAPC11/H2BC11/ANAPC2/UBE2S/MAPK7/ANAPC15/H2BC14/CDKN2D/H2AX/H2BC3/ANAPC1/UBE2E1/RPS6KA2/H2BC17/H3C1/CCNA2/RPS6KA3
BACOLOD_RESISTANCE_TO_ALKYLATING_AGENTS_UP	BACOLOD_RESISTANCE_TO_ALKYLATING_AGENTS_UP	24	0.538035	1.56716	0.0261943	tags=25%, list=3%, signal=24%	CCN1/MT2A/MT1A/MDK/MT1X/TDGF1P3
REACTOME_HS_GAG_DEGRADATION	REACTOME_HS_GAG_DEGRADATION	22	0.551013	1.56573	0.0288231	tags=27%, list=10%, signal=24%	AGRN/IDUA/SDC4/SGSH/GPC1/HPSE2
SCIAN_INVERSED_TARGETS_OF_TP53_AND_TP73_DN	SCIAN_INVERSED_TARGETS_OF_TP53_AND_TP73_DN	28	0.519296	1.56548	0.0174715	tags=25%, list=9%, signal=23%	BHLHE40/ATF3/NFKB2/DNAJB6/BAIAP2/EIF1/ATP2B4
HELLER_HDAC_TARGETS_UP	HELLER_HDAC_TARGETS_UP	296	0.358549	1.56548	0.000123338	tags=33%, list=20%, signal=27%	JUNB/HES1/AGRN/L1CAM/SNRNP70/MT2A/ANKZF1/TMEM259/GPAA1/JAG2/MT1H/ZSWIM8/SCML1/DAPK3/MT1X/MT1E/TUBA1A/G6PD/GPSM2/PLEC/GSTM4/CTTN/CLPTM1/PLPPR2/PLK2/SDC4/GSDMB/PAGR1/DNM2/MYO9B/TRIP6/MARCKSL1/FAM20C/BCL6/PCSK1N/PEG10/MYRF/MFSD12/ZER1/LLGL2/HHLA3/PDLIM7/CYP1A1/TSPAN13/ATP13A2/HLA-DRB1/KHK/ALDH4A1/JUP/CDKN2D/PIK3CD/SLC6A8/DHRS2/WASF1/CDC34/CFH/MT1F/KLF2/ADCY9/PLXNA3/H1-0/POR/PDE4DIP/GPM6A/RTN2/SPINK2…
GAZDA_DIAMOND_BLACKFAN_ANEMIA_ERYTHROID_UP	GAZDA_DIAMOND_BLACKFAN_ANEMIA_ERYTHROID_UP	26	0.527749	1.56477	0.0252802	tags=38%, list=17%, signal=32%	SNRNP70/SOS1/CSF1/PRKX/TNFRSF10B/FAS/ATP6V1B2/HNRNPR/DPY19L1/LIMK2
MARCINIAK_ER_STRESS_RESPONSE_VIA_CHOP	MARCINIAK_ER_STRESS_RESPONSE_VIA_CHOP	20	0.563186	1.56445	0.0263174	tags=25%, list=5%, signal=24%	PPP1R15A/DDIT3/CHKA/ADH7/RAD1
MUELLER_METHYLATED_IN_GLIOBLASTOMA	MUELLER_METHYLATED_IN_GLIOBLASTOMA	37	0.486952	1.56437	0.0239116	tags=8%, list=2%, signal=8%	CXCL2/IER3/SFN
REACTOME_NCAM1_INTERACTIONS	REACTOME_NCAM1_INTERACTIONS	40	0.475566	1.56433	0.0206483	tags=35%, list=22%, signal=27%	AGRN/COL3A1/COL6A2/GDNF/COL9A2/GFRA2/CACNA1I/COL6A1/ARTN/ST8SIA4/NCAM1/CACNA1S/CACNB1/COL6A6
KUUSELO_PANCREATIC_CANCER_19Q13_AMPLIFICATION	KUUSELO_PANCREATIC_CANCER_19Q13_AMPLIFICATION	29	0.515559	1.56432	0.0214288	tags=31%, list=9%, signal=28%	ZFP36/C19orf47/DYRK1B/DLL3/SUPT5H/SAMD4B/LGALS14/RPS16/FCGBP
REACTOME_SYNTHESIS_OF_PIPS_AT_THE_PLASMA_MEMBRANE	REACTOME_SYNTHESIS_OF_PIPS_AT_THE_PLASMA_MEMBRANE	48	0.460596	1.56369	0.0122056	tags=31%, list=13%, signal=27%	MTMR3/PIP5K1A/PIK3C2A/PIK3R6/PIK3R1/MTMR2/PIP5K1C/INPP5K/PIP4K2A/PIP5K1B/PIP4K2B/RUFY1/PIK3CD/MTM1/PIK3R3
REACTOME_PERK_REGULATES_GENE_EXPRESSION	REACTOME_PERK_REGULATES_GENE_EXPRESSION	29	0.515314	1.56358	0.0214288	tags=21%, list=9%, signal=19%	CXCL8/ATF3/DDIT3/NFYC/DIS3/EXOSC9
GERHOLD_ADIPOGENESIS_DN	GERHOLD_ADIPOGENESIS_DN	59	0.445864	1.56351	0.00777605	tags=17%, list=5%, signal=16%	IER3/CCN1/BAX/UCP2/MMP14/DNAJB1/TUBA1A/GAS7/TUBB/GAS6
REACTOME_RNA_POLYMERASE_III_TRANSCRIPTION	REACTOME_RNA_POLYMERASE_III_TRANSCRIPTION	36	0.485259	1.56346	0.0178769	tags=39%, list=19%, signal=32%	NFIX/SSB/GTF3C1/ZNF143/POU2F1/BRF2/GTF3C5/POLR3G/POLR1C/BRF1/POLR3E/POLR3K/TBP/POLR3D
HAMAI_APOPTOSIS_VIA_TRAIL_DN	HAMAI_APOPTOSIS_VIA_TRAIL_DN	191	0.373255	1.56302	0.00239943	tags=24%, list=14%, signal=21%	JUN/GDF15/SLCO4A1/TAGLN2/SH3BP1/SLC29A1/PYCR1/MRPL2/MTA1/VAV3/MDK/GTPBP3/PLTP/GRWD1/SAC3D1/PAGR1/ERF/FBLN1/ZNF629/FZD5/SERPINH1/SGSH/PRDM13/TERT/ADRA2C/SMARCD2/DHRS2/BCL3/IMPDH1/H2BC3/FSTL3/CHMP1A/CDC34/COL6A1/KLF2/EFNA1/ICAM3/KCNG1/SLC5A6/ARRB1/CEP250/TYMP/PCDHB2/PTPRF/POLR3E/DDAH2
REACTOME_SIGNALING_BY_FGFR	REACTOME_SIGNALING_BY_FGFR	80	0.426784	1.56284	0.00428482	tags=35%, list=22%, signal=27%	SPRY2/TIAL1/HNRNPM/SOS1/SRC/CBL/GTF2F2/PIK3R1/GAB1/POLR2J/GRB2/PPP2CA/FLRT3/FGF6/POLR2C/PPP2R1A/NCBP2/FGF20/POLR2B/POLR2A/SPRED2/FGFR4/PTBP1/RPS27A/FGFRL1/MAPK1/POLR2D/SHC1
REACTOME_VEGFR2_MEDIATED_VASCULAR_PERMEABILITY	REACTOME_VEGFR2_MEDIATED_VASCULAR_PERMEABILITY	25	0.531454	1.5628	0.0262718	tags=56%, list=29%, signal=40%	VAV3/VAV2/HSP90AA1/PRR5/JUP/CALM1/AKT1/CAV1/PAK2/AKT3/AKT2/PAK3/MTOR/MLST8
BUCKANOVICH_T_LYMPHOCYTE_HOMING_ON_TUMOR_DN	BUCKANOVICH_T_LYMPHOCYTE_HOMING_ON_TUMOR_DN	21	0.556521	1.56249	0.025108	tags=19%, list=4%, signal=18%	HES1/NCOA1/SAC3D1/SPIDR
BANDRES_RESPONSE_TO_CARMUSTIN_MGMT_48HR_DN	BANDRES_RESPONSE_TO_CARMUSTIN_MGMT_48HR_DN	151	0.381936	1.56205	0.00290954	tags=26%, list=16%, signal=22%	IER3/BICD1/PFKFB2/ATP6V0C/EPHX1/GRB7/MVD/MDK/HOXA4/FKBP1A/PAX8/PCOLCE/IRS1/DVL1/BAIAP2/PTPN3/MSR1/PFN1/UPF1/ITGA3/MAD1L1/H2AX/TAC1/EIF6/GABRA6/CTF1/BRF1/ARTN/SHOX/KRT17/ADCYAP1/GAMT/SORBS2/TLE3/NKX2-2/ATP4B/INPPL1/RAD9A/GOLGA2
NGUYEN_NOTCH1_TARGETS_DN	NGUYEN_NOTCH1_TARGETS_DN	78	0.424977	1.56107	0.00449713	tags=23%, list=10%, signal=21%	CCN1/PPIF/KLF10/TRIO/ZNF282/PCDH7/DYNC1H1/CADM1/SLC12A4/MYC/NET1/TIPARP/SERPINH1/TP63/NOP2/PNN/IGF1R/HUWE1
WP_WNT_SIGNALING_PATHWAY_NETPATH	WP_WNT_SIGNALING_PATHWAY_NETPATH	49	0.459789	1.56039	0.0128551	tags=31%, list=15%, signal=26%	CSNK1E/TSC1/MYC/LRP5/ARRB2/DVL1/CSNK1G1/FRAT1/PIP5K1B/DVL3/TSC2/CSNK1D/AKT1/GSK3B/PRKCB
PID_ER_NONGENOMIC_PATHWAY	PID_ER_NONGENOMIC_PATHWAY	40	0.474322	1.56024	0.0216374	tags=28%, list=12%, signal=24%	HBEGF/GNAI2/SOS1/SRC/MSN/PIK3R1/GRB2/GNAO1/IGF1R/GNG2/AKT1
REACTOME_GAB1_SIGNALOSOME	REACTOME_GAB1_SIGNALOSOME	13	0.624929	1.56014	0.0392773	tags=46%, list=11%, signal=41%	HBEGF/SRC/PIK3R1/GAB1/GRB2/PAG1
WP_ADIPOGENESIS	WP_ADIPOGENESIS	124	0.394871	1.55965	0.00224749	tags=21%, list=11%, signal=19%	TNF/IL6/DDIT3/HMGA1/SERPINE1/NCOR2/SOCS3/NCOA1/BMP1/KLF6/IRS1/DVL1/PPARA/SMAD3/WNT5B/SREBF1/CYP26A1/MEF2A/LPIN3/STAT5B/GADD45A/CNTFR/WWTR1/FAS/STAT5A/RXRA
REACTOME_NRAGE_SIGNALS_DEATH_THROUGH_JNK	REACTOME_NRAGE_SIGNALS_DEATH_THROUGH_JNK	56	0.450133	1.55886	0.0127095	tags=27%, list=9%, signal=24%	AKAP13/ARHGEF1/ARHGEF11/TRIO/ARHGEF6/MAGED1/VAV3/SOS1/VAV2/ITSN1/NET1/ARHGEF2/ARHGEF39/OBSCN/NGF
PID_ILK_PATHWAY	PID_ILK_PATHWAY	43	0.468119	1.55883	0.0250994	tags=35%, list=19%, signal=28%	JUN/ARHGEF6/MYL9/ZYX/TACC3/PARVB/HSP90AA1/RHOG/XPO1/AKT1/GSK3B/DIAPH1/NCK2/ZEB1/AURKA
CHENG_RESPONSE_TO_NICKEL_ACETATE	CHENG_RESPONSE_TO_NICKEL_ACETATE	39	0.478894	1.55882	0.0190478	tags=38%, list=21%, signal=31%	JUN/PNPLA2/TIAL1/RABGGTB/ATP1B1/TLK2/HSP90AA1/APP/POLR2C/MS4A6A/RBBP8/CEBPD/TRAP1/TF/CSNK2B
CHIARADONNA_NEOPLASTIC_TRANSFORMATION_KRAS_DN	CHIARADONNA_NEOPLASTIC_TRANSFORMATION_KRAS_DN	136	0.388819	1.5588	0.00401073	tags=18%, list=11%, signal=17%	FOS/DUSP1/ATF3/ADM/GSTM1/SLCO3A1/EPHX1/SLC29A1/TRIM47/CALML4/SOCS3/PLTP/LY6H/PCOLCE/RBMS2/LLGL2/DGCR2/JUP/SPTAN1/APP/SEC14L1/TOB1/MAP1LC3B/KLF2/GAS1
KYNG_NORMAL_AGING_DN	KYNG_NORMAL_AGING_DN	17	0.587737	1.55849	0.0273123	tags=35%, list=3%, signal=34%	BHLHE40/TIMD4/PWWP2A/MT1X/KDSR/IL17RB
PID_RHOA_REG_PATHWAY	PID_RHOA_REG_PATHWAY	45	0.464301	1.55799	0.0149115	tags=38%, list=16%, signal=32%	AKAP13/ARHGEF1/ARHGDIA/ARHGEF11/TRIO/VAV3/VAV2/NET1/MYO9B/ARHGEF2/OPHN1/OBSCN/MCF2L/ARHGAP6/MCF2/ARHGEF5/FARP1
PEREZ_TP53_AND_TP63_TARGETS	PEREZ_TP53_AND_TP63_TARGETS	193	0.370905	1.55679	0.00111981	tags=23%, list=15%, signal=20%	EGR1/KLHL21/APAF1/RBM38/CGAS/SMAD7/ARHGEF6/METRNL/TAF5/ZNF385A/NLRP1/EPB41L3/GPT2/ZFYVE1/SEMA4D/MAN1C1/WHRN/SIPA1L2/CRAMP1/MARCHF3/CELF2/VASN/HS6ST1/NTN1/GRHL3/IGF1R/MAP7/LRRC37A4P/GPATCH2L/GOLGA2P5/FOXP4/TNRC6C/DOK4/ARRB1/TSC22D3/EPB41L4B/SLC4A11/MICALL2/DEDD2/EPPK1/CNNM4/ARIH1/UBE2QL1/ZIC2/ADCY1
JINESH_BLEBBISHIELD_TO_IMMUNE_CELL_FUSION_PBSHMS_UP	JINESH_BLEBBISHIELD_TO_IMMUNE_CELL_FUSION_PBSHMS_UP	362	0.348487	1.55676	0.000116585	tags=23%, list=15%, signal=20%	EGR1/JUN/ADM/CCN1/ATP2A2/CTSZ/IFFO2/BAX/EPHA2/BSG/TOR3A/CHKA/TRIO/FLNB/SVIL/MPRIP/ST3GAL4/MED15/ZYX/PCDH7/DUSP10/H2BC11/SMAGP/LRP5L/DYNC1H1/CTTN/PMEPA1/KLF6/LARP4B/EPB41L3/HLA-A/SLC12A4/ERRFI1/MYH9/CUL9/CLPTM1L/FBLN1/SEPTIN3/SMAD3/SCN9A/LHFPL2/ADGRG6/HSP90AA1/SERPINH1/ADCY6/CLIP1/LMF2/ATP1A1/PATJ/MBOAT7/GADD45A/DGCR2/TNFRSF10B/JUP/BCL2L1/SNX31/FHL2/PLA2G2A/IGF2BP2/FLRT3/PLXNA3/PROK2/MYADM/CABLES1…
BIOCARTA_ERK_PATHWAY	BIOCARTA_ERK_PATHWAY	26	0.525031	1.55671	0.0263174	tags=65%, list=28%, signal=47%	MAP2K2/SOS1/MYC/GRB2/NGF/IGF1R/PPP2CA/MKNK2/GNAS/EGFR/MAPK1/SHC1/DPM2/PDGFRA/STAT3/RAF1/ITGB1
NIKOLSKY_BREAST_CANCER_16Q24_AMPLICON	NIKOLSKY_BREAST_CANCER_16Q24_AMPLICON	48	0.458405	1.55625	0.0138974	tags=35%, list=21%, signal=28%	CBFA2T3/MVD/BANP/CPNE7/DBNDD1/FANCA/ZCCHC14/CHMP1A/MAP1LC3B/ANKRD11/APRT/SPIRE2/ZNF276/PIEZO1/EMC8/IL17C/RNF166
WP_ETHANOL_METABOLISM_RESULTING_IN_PRODUCTION_OF_ROS_BY_CYP2E1	WP_ETHANOL_METABOLISM_RESULTING_IN_PRODUCTION_OF_ROS_BY_CYP2E1	10	0.674676	1.55622	0.0193435	tags=20%, list=1%, signal=20%	MAFG/MAP2K2
ENK_UV_RESPONSE_EPIDERMIS_DN	ENK_UV_RESPONSE_EPIDERMIS_DN	492	0.340898	1.55603	1.62751e-05	tags=22%, list=15%, signal=19%	EGR1/CXCL2/DUSP6/ATF3/SLCO4A1/FOSB/ADM/SPRY2/ADAMTS1/SLCO3A1/EPHA2/CTPS1/SMAD7/DNAJB1/NCOR2/VAV3/NFATC3/DCP1A/SNHG17/DAPK3/NCOA1/LSS/MT1X/PFKFB3/DUSP10/FOSL1/DDX10/TUBA1A/SHB/UBAP1/CBX4/CRY1/IRF6/CADM1/GAN/DNAJB6/FAM117A/LIN7B/FKBP8/ERF/SEMA4D/TESK1/KLF11/ENTPD7/GAS6/ATF6B/PNRC1/TESK2/NBR1/GAB2/NDEL1/NECTIN2/TULP4/CYP4B1/CYTH1/RNF4/RAPGEFL1/PRKCH/RLF/SAP30BP/PRDM2/CHORDC1/SCARB1/RIPK4/TNFRSF10B/P…
REACTOME_REGULATION_OF_TP53_ACTIVITY_THROUGH_PHOSPHORYLATION	REACTOME_REGULATION_OF_TP53_ACTIVITY_THROUGH_PHOSPHORYLATION	83	0.417729	1.55578	0.0061349	tags=41%, list=22%, signal=32%	TAF15/ATM/TAF6/TAF5/TPX2/TOP3A/TP53INP1/RAD1/DYRK2/PRKAG2/HIPK1/RAD17/HIPK2/STK11/CSNK2A1/ATR/RBBP8/PRKAG1/CCNA2/HUS1/ATRIP/RAD9A/MAPK14/TP53RK/TBP/RAD9B/AURKA/RPS27A/CSNK2A2/CSNK2B/SSRP1/AURKB/WRN/RAD50
MCBRYAN_PUBERTAL_TGFB1_TARGETS_UP	MCBRYAN_PUBERTAL_TGFB1_TARGETS_UP	164	0.37667	1.55566	0.00421954	tags=28%, list=20%, signal=23%	IER3/BHLHE40/HES1/CCN1/SOX9/MMP14/BMP1/PTK2B/TGIF1/DNM2/NET1/MARCKSL1/PCOLCE/LTF/TNC/CYTH1/ATP1A1/STAT5B/PICALM/TPM2/OGFR/VASN/GALNT2/TGM2/JPT1/FOXA1/AKT1/CSNK2A1/HAS2/CCNK/CYB5R3/HK1/TIMP2/FN1/TLE3/RPS6KA3/ST14/MAPK14/EPB41L2/SIAH2/JAG1/IER5/EGR2/LASP1/F3/IL13RA1
NADLER_OBESITY_UP	NADLER_OBESITY_UP	58	0.445557	1.55528	0.00734806	tags=12%, list=7%, signal=11%	DUSP1/CTSZ/UCP2/MT1X/PLTP/CTSK/PFN1
REACTOME_TRAFFICKING_OF_AMPA_RECEPTORS	REACTOME_TRAFFICKING_OF_AMPA_RECEPTORS	31	0.500384	1.55418	0.0142913	tags=35%, list=15%, signal=30%	DLG4/AP2A1/AP2A2/CAMK2G/CACNG4/GRIA4/AP2M1/AKAP5/TSPAN7/AP2S1/PRKCB
WP_FIBRIN_COMPLEMENT_RECEPTOR_3_SIGNALING_PATHWAY	WP_FIBRIN_COMPLEMENT_RECEPTOR_3_SIGNALING_PATHWAY	34	0.486613	1.55338	0.0279656	tags=9%, list=2%, signal=9%	TNF/IL6/SRC
BIOCARTA_BCELLSURVIVAL_PATHWAY	BIOCARTA_BCELLSURVIVAL_PATHWAY	11	0.65417	1.55266	0.024624	tags=27%, list=4%, signal=26%	FOS/ZBTB7A/PIK3R1
KEGG_RENAL_CELL_CARCINOMA	KEGG_RENAL_CELL_CARCINOMA	65	0.439635	1.5526	0.0109214	tags=28%, list=15%, signal=24%	JUN/MAP2K2/SOS1/PIK3R1/EP300/PAK4/VEGFB/GAB1/PIK3CD/GRB2/AKT1/PIK3R3/FLCN/PDGFB/PAK5/ARNT/VHL/CRKL
SIMBULAN_UV_RESPONSE_NORMAL_DN	SIMBULAN_UV_RESPONSE_NORMAL_DN	32	0.493447	1.55222	0.0264263	tags=53%, list=23%, signal=41%	PHLDA1/GRB7/RBPMS/ID1/PLEC/MYC/TP63/PIP4K2B/DUSP7/HAS2/POLR2A/MCL1/ITGB4/ITGA6/EGFR/AHNAK/ADRB2
ABBUD_LIF_SIGNALING_2_UP	ABBUD_LIF_SIGNALING_2_UP	12	0.638259	1.552	0.0298581	tags=17%, list=2%, signal=16%	JUNB/ATP1B1
WP_TP53_NETWORK	WP_TP53_NETWORK	18	0.575467	1.55195	0.0339576	tags=33%, list=8%, signal=31%	BAX/ATM/MYC/BCL2/TP63/GADD45A
WP_MONOAMINE_TRANSPORT	WP_MONOAMINE_TRANSPORT	30	0.503822	1.55161	0.0252767	tags=33%, list=14%, signal=29%	TNF/ADORA2A/IL1B/SYN1/NECTIN2/TDO2/AMPH/TSC2/SCAMP2/STX1A
SIG_PIP3_SIGNALING_IN_CARDIAC_MYOCTES	SIG_PIP3_SIGNALING_IN_CARDIAC_MYOCTES	67	0.434283	1.5511	0.0107107	tags=43%, list=24%, signal=33%	YWHAE/TSC1/SOS1/SFN/CYTH3/MYC/IRS1/PAK4/CREB5/GADD45A/GAB1/BCL2L1/PIK3CD/GRB2/TSC2/AKT1/GSK3B/RPS6KA2/PAK5/RPS6KA3/INPPL1/YWHAZ/PAK2/PARD6A/AKT3/PREX1/SHC1/AKT2/PIK3CA
DELACROIX_RAR_BOUND_ES	DELACROIX_RAR_BOUND_ES	438	0.341982	1.55095	6.33287e-05	tags=21%, list=15%, signal=18%	DUSP1/JUNB/BHLHE40/ATF3/HBEGF/TRIM28/IER2/DDIT3/ATP2A2/SPRY2/UBE2O/CTSZ/AGPAT1/RBPMS/SH3BP1/NACC2/SRC/TWF2/SOCS3/DEDD/TEX21P/MDK/HOXA4/ARF4/SKIL/EBF4/UBAP1/PARVB/PIDD1/DNAJB6/LIN28A/RMND5B/CAMK1D/TMEM253/KRCC1/ST6GALNAC6/RAI1/LRRC61/FRAT1/ZFP64/SBNO2/TLE5/PIM3/PPDPF/PPP1R10/FAM171B/SLC35F2/AGTRAP/RHBDD2/PDLIM1/MBD3/STK35/SET/FAM120C/B3GNT7/SEPSECS/BCL3/GRHL3/PYROXD1/FOXA1/GCH1/RHOF/GPATCH3/KLF2/E…
PID_SYNDECAN_3_PATHWAY	PID_SYNDECAN_3_PATHWAY	17	0.584516	1.54995	0.0278325	tags=18%, list=4%, signal=17%	CXCL8/SRC/CTTN
WP_NCRNAS_INVOLVED_IN_WNT_SIGNALING_IN_HEPATOCELLULAR_CARCINOMA	WP_NCRNAS_INVOLVED_IN_WNT_SIGNALING_IN_HEPATOCELLULAR_CARCINOMA	86	0.412648	1.54821	0.0103254	tags=27%, list=15%, signal=23%	JUN/CSNK1E/SENP2/WIF1/CXXC4/FOSL1/MYC/LRP5/DVL1/FRAT1/FZD5/WNT5B/DVL3/WNT10A/WNT4/NKD2/CHD8/CSNK2A1/GSK3B/DKK1/CTNNBIP1/TCF7L1/DKK2
CROMER_METASTASIS_DN	CROMER_METASTASIS_DN	76	0.421758	1.54768	0.00907045	tags=37%, list=18%, signal=30%	UBE3C/FLNB/SVIL/ACTA1/BMP1/SMTN/PLEC/SDC4/BAIAP2/ATP5F1D/PA2G4/TP63/NOP2/ALDH4A1/TNFRSF10B/JUP/ITGA3/MINK1/DTX2/DUSP7/PRODH/HSPA2/CAV1/CUL1/MBD2/TNNT3/ITGB4/TTLL12
REACTOME_REGULATION_OF_CHOLESTEROL_BIOSYNTHESIS_BY_SREBP_SREBF	REACTOME_REGULATION_OF_CHOLESTEROL_BIOSYNTHESIS_BY_SREBP_SREBF	50	0.454739	1.54695	0.0214953	tags=30%, list=13%, signal=26%	MVD/SEC24C/NCOA1/LSS/TBL1XR1/NFYC/PPARA/SREBF1/SEC24D/SQLE/RXRA/ACACB/INSIG2/NCOA6/FASN
BOYLAN_MULTIPLE_MYELOMA_C_DN	BOYLAN_MULTIPLE_MYELOMA_C_DN	54	0.450988	1.54653	0.0168029	tags=44%, list=29%, signal=32%	JUN/BICD1/SLC30A1/KLF6/G6PC3/RAB30/ATXN1/LAPTM4B/ZC2HC1A/SFMBT2/BPIFA2/FAM234A/BCL11B/B4GALT6/APOE/TMEM191C/RNF125/TNFRSF21/ENAH/CERS6/RAB20/XIST/AK7/VOPP1
ALFANO_MYC_TARGETS	ALFANO_MYC_TARGETS	229	0.361444	1.54549	0.00129226	tags=33%, list=23%, signal=26%	AGRN/ADM/PPP1R15A/CCN1/PPIF/PHLDA1/SOX9/CLCN2/LY6E/PYCR1/SVIL/GNAI2/ABCC5/ATP1B1/SMTN/PLEC/CSRP1/SDC4/DNAJB6/MYC/CDK2AP2/TRIP6/ECPAS/MMP17/GAS6/TLE5/CTSK/AK4/DNAJC11/MAG/UBE2K/PICALM/ATP8B1/RCC1/TGM2/DESI1/IMPDH1/KCTD12/NOP56/CELSR3/LARP1/FGA/DDX17/DDX21/MCL1/CYTIP/TIMP2/PCYT1B/ITGA7/SMPD4/BMP4/MYLK/CRIP2/ITGA6/TTLL12/ZEB1/GREM1/LASP1/SLC39A6/TP53BP2/TRAP1/KIF3C/HMGB3/STC1/RER1/PDCD11/QSOX1/DUSP2…
WOOD_EBV_EBNA1_TARGETS_UP	WOOD_EBV_EBNA1_TARGETS_UP	104	0.401963	1.54542	0.00478903	tags=36%, list=19%, signal=29%	SLCO4A1/SLCO3A1/SF1/EPHX1/ARHGDIA/GCLM/RBPMS/SLC29A1/DNAJB1/HYOU1/TUBA1A/GSTM4/MYC/FBLN1/EIF4G1/GLUL/CHERP/SERPINH1/DUSP14/DGCR2/SCARB1/F8A1/PRKCSH/DPAGT1/FASN/CD44/NEFH/TYRO3/SORD/NELL2/GNAS/PTBP1/MAPRE2/TXNRD1/PODXL/LGALS3BP/HSPD1
JIANG_AGING_HYPOTHALAMUS_DN	JIANG_AGING_HYPOTHALAMUS_DN	35	0.47986	1.54337	0.0344597	tags=37%, list=22%, signal=29%	DLG4/STIP1/CS/DHX30/GDI1/CAMK2G/AP2M1/DDB1/PLD3/ATP9A/SYT1/ATP1B2/APOE
BIOCARTA_GCR_PATHWAY	BIOCARTA_GCR_PATHWAY	16	0.589683	1.54136	0.0451389	tags=50%, list=24%, signal=38%	PIK3R1/HSP90AA1/CALM1/AKT1/GNAS/CALM2/ADRB2/PIK3CA
REACTOME_SIGNALING_BY_NUCLEAR_RECEPTORS	REACTOME_SIGNALING_BY_NUCLEAR_RECEPTORS	270	0.355383	1.54079	0.000367267	tags=21%, list=14%, signal=19%	FOS/JUN/HBEGF/FOSB/NCOR2/GNAI2/KDM4B/KDM4A/SRC/NCOA1/USF2/TBL1XR1/PLTP/H2BC11/SMC1A/CBFB/GTF2F2/PIK3R1/MYC/EP300/GPS2/HSP90AA1/BCL2/HSP90AB1/SREBF1/CYP26A1/DHRS9/SMC3/POU2F1/H2BC14/XPO1/KANK1/POLR2J/H2AX/CALM1/PRMT1/ADH4/H2BC3/FOXA1/IGF1R/GNG8/RXRA/GNG2/TNRC6C/POLR2C/S1PR3/AKT1/PIK3R3/FABP6/H2BC17/FASN/POLR2B/DHRS4/POLR2A/CETP/H3C1/NCOR1/AGO4
SHEPARD_BMYB_TARGETS	SHEPARD_BMYB_TARGETS	72	0.425473	1.54078	0.00931936	tags=38%, list=21%, signal=30%	HMGA1/MT2A/BMS1/UCP2/FOXM1/NUMA1/MDK/TACC3/TPX2/KIF11/KIF23/ATP1A1/S1PR1/PTPRN/HLX/PRC1/PLP1/DDX17/MELK/TTN/FGFR4/PCDH18/MKI67/GPSM1/ANLN/AURKB/NOTCH2
CAIRO_HEPATOBLASTOMA_CLASSES_DN	CAIRO_HEPATOBLASTOMA_CLASSES_DN	196	0.36601	1.53807	0.00167395	tags=29%, list=19%, signal=24%	EGR1/BHLHE40/NFKBIA/JADE2/KDM2A/SMAD7/SLC30A1/ATN1/ZSWIM8/SHB/PEBP1/LCK/FAM189A2/CAMK1D/BCL6/SMAD3/GAS6/GLUL/MAN1C1/TRADD/PRKCH/PTPRB/TTC9/CYP1A1/TBC1D2B/KHK/ABCA2/VSTM4/MICU1/SERPING1/SGPL1/FAS/AADAC/ENG/ST3GAL5/TSC22D3/MAP3K5/TUT7/ITM2A/HOMER2/HPD/MFAP3L/GHR/PACRG/DBP/CSRP2/KLRB1/MYLK/CTSF/PLXNB2/RARB/ZEB1/GABARAPL1/DAPK1/TRANK1/KANK2/SNED1
WP_HEMATOPOIETIC_STEM_CELL_DIFFERENTIATION	WP_HEMATOPOIETIC_STEM_CELL_DIFFERENTIATION	56	0.443944	1.53743	0.0158565	tags=18%, list=11%, signal=16%	FOS/IL6/FOSB/CBFA2T3/IL1B/CSF1/CD34/IL3/STAT5A/MIR181A1
ONDER_CDH1_SIGNALING_VIA_CTNNB1	ONDER_CDH1_SIGNALING_VIA_CTNNB1	81	0.417331	1.53709	0.00962943	tags=28%, list=21%, signal=23%	CXCL2/CXCL8/CXCL1/SOX9/FBLN5/SERPINE1/MYL9/SCG5/EPHB2/TSPAN13/CCNG2/MYO1B/EFNA1/EPB41L4B/BIRC3/COL1A2/MFAP2/GREM1/PODXL/IL17RC/PELI1/NREP/BIN1
MYLLYKANGAS_AMPLIFICATION_HOT_SPOT_17	MYLLYKANGAS_AMPLIFICATION_HOT_SPOT_17	18	0.569746	1.53652	0.0370682	tags=44%, list=14%, signal=38%	PRCC/HSP90AA1/CDC73/SDHC/PAX7/TSC22D3/NTRK1/ARNT
REACTOME_ERK_MAPK_TARGETS	REACTOME_ERK_MAPK_TARGETS	22	0.540658	1.5363	0.0381708	tags=45%, list=17%, signal=38%	DUSP6/PPP2R5D/MAPK7/MEF2A/PPP2CA/PPP2R1A/RPS6KA2/DUSP7/RPS6KA3/MAPK14
DELYS_THYROID_CANCER_UP	DELYS_THYROID_CANCER_UP	416	0.340424	1.53629	8.69166e-05	tags=19%, list=15%, signal=17%	CXCL2/IER3/CXCL8/BHLHE40/DUSP6/GDF15/BICD1/AGRN/ADM/DUSP5/ETV1/EPHA2/PASK/GRB7/UCP2/LY6E/SFN/COL3A1/PKM/NCDN/MDK/SAMD4A/PCDH7/NAB2/SCG5/EMP3/RASAL2/MARCO/SPOCK2/CTTN/PTPRE/SV2A/SDC4/PC/RGS3/ADAM12/TIPARP/WARS1/SEMA3F/TNC/TMC6/TPSB2/MSR1/TDO2/TNFRSF10B/PSD3/PTP4A3/PDLIM1/ITGA3/H2AX/TGM2/SCN1B/ADK/FAS/MRC1/FSTL3/IGF2BP2/ATP6V1B2/LST1/ADORA1/PTK7/C4A/ITGB7/ST3GAL5/TNFRSF1A/ELF4/MAP3K5/RPS6KA2/RREB1/…
KEGG_WNT_SIGNALING_PATHWAY	KEGG_WNT_SIGNALING_PATHWAY	147	0.377975	1.53599	0.00296173	tags=27%, list=16%, signal=23%	JUN/VANGL2/CSNK1E/SENP2/NFATC3/WIF1/CXXC4/FOSL1/TBL1XR1/PPP2R5D/MYC/LRP5/EP300/DVL1/FRAT1/SMAD3/FZD5/WNT5B/PRKX/CAMK2G/DVL3/WNT9B/WNT10A/PPP2CA/WNT4/NKD2/CHD8/PPP2R1A/PPP3R1/CSNK2A1/GSK3B/DKK1/PRKACG/CTNNBIP1/TCF7L1/PRKCB/DKK2/RAC3/CUL1
KEGG_GNRH_SIGNALING_PATHWAY	KEGG_GNRH_SIGNALING_PATHWAY	95	0.404794	1.53591	0.0051779	tags=32%, list=18%, signal=26%	JUN/HBEGF/MAP2K2/MMP14/SOS1/SRC/MAP3K3/MAP2K7/PTK2B/PLA2G2C/MAPK7/PLA2G4A/MAP3K4/ADCY6/PRKX/CAMK2G/CALM1/GRB2/PLA2G12B/PLA2G2A/ADCY9/GNRH1/PRKACG/MAP2K3/PRKCB/ADCY1/MAPK14/GNAS/ADCY8/CACNA1S
PID_CASPASE_PATHWAY	PID_CASPASE_PATHWAY	49	0.452554	1.53584	0.0150588	tags=37%, list=14%, signal=32%	TNF/BAX/APAF1/ACTA1/NUMA1/MADD/LIMK1/TRAF2/PIDD1/BCL2/SREBF1/TRADD/DFFB/SPTAN1/APP/TNFRSF1A/LMNB1/BIRC3
REACTOME_ESTROGEN_DEPENDENT_NUCLEAR_EVENTS_DOWNSTREAM_OF_ESR_MEMBRANE_SIGNALING	REACTOME_ESTROGEN_DEPENDENT_NUCLEAR_EVENTS_DOWNSTREAM_OF_ESR_MEMBRANE_SIGNALING	20	0.552789	1.53557	0.0330919	tags=20%, list=8%, signal=18%	FOS/HBEGF/BCL2/XPO1
GRAHAM_CML_QUIESCENT_VS_NORMAL_DIVIDING_UP	GRAHAM_CML_QUIESCENT_VS_NORMAL_DIVIDING_UP	57	0.441684	1.5353	0.0119458	tags=16%, list=9%, signal=14%	CXCL2/JUN/CXCL8/IL1B/SMC3/RSRC2/DDIT4/BCL3/INTS6
WP_STRUCTURAL_PATHWAY_OF_INTERLEUKIN_1_IL1	WP_STRUCTURAL_PATHWAY_OF_INTERLEUKIN_1_IL1	47	0.456522	1.53526	0.0180561	tags=17%, list=7%, signal=16%	FOS/NFKBIA/MAP2K2/MAP3K3/MAP2K7/MYC/TOLLIP/TAB1
LIU_CMYB_TARGETS_UP	LIU_CMYB_TARGETS_UP	155	0.373773	1.53522	0.00273036	tags=32%, list=18%, signal=26%	SLCO3A1/GDPD3/MT2A/EPHX1/SOX9/SIK1/MT1H/NUMA1/NCOA1/MT1X/HYOU1/NAB2/IL17RB/PEBP1/IGFBP4/EMP3/SAC3D1/TGIF1/TIPARP/ARRB2/ZNF318/PPDPF/ZER1/AK4/MARCHF3/PLCXD1/CSGALNACT2/DHRS2/ABTB2/FHL2/AGAP1/PIM2/TOB1/MT1F/MAP1LC3B/ICAM3/RPS6KA2/RETREG2/NAGPA/KCNS3/MARCHF5/LYPD1/CTNS/NUCB2/SATB2/SRD5A1/PXDN/JAG1/MYO10
SMID_BREAST_CANCER_RELAPSE_IN_BONE_DN	SMID_BREAST_CANCER_RELAPSE_IN_BONE_DN	288	0.352435	1.53492	0.000498913	tags=24%, list=17%, signal=20%	CXCL8/L1CAM/TAGLN2/SLC43A3/NFIX/YWHAE/SOX9/STIP1/MMP14/CD52/GPR19/EDN1/ITM2C/CDV3/WIF1/BMP1/NLRP1/MAGEA4/GPSM2/MARCO/GSTM4/KLF6/NFYC/MICALL1/MTAP/SIGMAR1/PGBD5/PLA2G4A/WARS1/AMD1/WNT5B/PEG10/MCM5/PRDM13/CHST3/FOLH1/PRKX/TDO2/PICALM/TTLL4/CD22/LMO4/PTP4A3/FBXO17/IL32/SMPDL3B/WWTR1/KHDRBS3/PDE9A/IGF2BP2/CHRM3/KCNG1/USP34/IL1R2/LRP12/KRT17/DKK1/PTPRF/MCL1/DSC2/CAPN6/CD44/PAX6/PRAME/WTAP/POU2AF1/TM4S…
SPIELMAN_LYMPHOBLAST_EUROPEAN_VS_ASIAN_UP	SPIELMAN_LYMPHOBLAST_EUROPEAN_VS_ASIAN_UP	452	0.338147	1.53428	4.79432e-05	tags=24%, list=15%, signal=21%	HES1/PRRC2A/BAX/ARID3A/PKN1/APAF1/TAF15/CSNK1E/MAP2K2/UCP2/DEAF1/MLF2/VPS4A/MTA1/PKD1/SFN/TAF6/TAF5/B4GALT1/C1QBP/LSS/RECQL4/SGTA/TACC3/TUBA1A/PEBP1/ARF5/PSMC3IP/NME4/CNPY3/POLE/GTF3C1/CTTN/GTF2F2/PEX14/NDUFB4/TUBB/SUPT20H/LUC7L/CDK2AP2/NET1/BANF1/MARCKSL1/EP300/DVL1/TESK1/TMC6/LSM4/PNRC1/RTN4/ATP5F1D/TLE5/GDI1/CLIP1/SUPT5H/DROSHA/PFN1/NFE2L1/KDM5C/ATP1A1/HNRNPD/POLA1/HHLA3/MBOAT7/LTB/CD22/FANCA/…
SA_TRKA_RECEPTOR	SA_TRKA_RECEPTOR	17	0.578115	1.53297	0.0432526	tags=65%, list=24%, signal=50%	MAP2K2/SOS1/PIK3CD/GRB2/NGF/AKT1/NTRK1/AKT3/SHC1/AKT2/PIK3CA
WP_NOTCH_SIGNALING_PATHWAY_NETPATH	WP_NOTCH_SIGNALING_PATHWAY_NETPATH	60	0.437379	1.53283	0.0145286	tags=30%, list=16%, signal=25%	HES1/NCOR2/JAG2/SRC/LCK/PIK3R1/MYC/EP300/DLL3/NUMB/AKT1/PSEN2/GSK3B/SPEN/NCOR1/CUL1/TLE1/DTX1
WP_SIGNALING_PATHWAYS_IN_GLIOBLASTOMA	WP_SIGNALING_PATHWAYS_IN_GLIOBLASTOMA	79	0.416211	1.53277	0.00706375	tags=27%, list=12%, signal=24%	SPRY2/MAP2K2/ATM/PIK3C2A/TSC1/SRC/MAP2K7/CBL/PIK3R1/MAP2K5/ERRFI1/EP300/IRS1/PRKCH/GAB1/PIK3CD/GRB2/IGF1R/TSC2/NF1/AKT1
WOO_LIVER_CANCER_RECURRENCE_UP	WOO_LIVER_CANCER_RECURRENCE_UP	102	0.399737	1.53268	0.0123498	tags=18%, list=7%, signal=16%	CXCL8/DDIT3/HMGA1/CXCL1/SOX9/GEM/JAG2/PKM/GAS7/TLK2/TNFRSF25/ENO2/ARHGEF2/RGS10/COL9A2/BCL2/HKDC1/TPM2
REACTOME_UNFOLDED_PROTEIN_RESPONSE_UPR	REACTOME_UNFOLDED_PROTEIN_RESPONSE_UPR	85	0.409959	1.53211	0.00473098	tags=18%, list=10%, signal=16%	CXCL8/ATF3/DDIT3/SYVN1/GFPT1/ARFGAP1/HYOU1/TSPYL2/NFYC/DCTN1/SEC31A/DDX11/DIS3/EXOSC9/EDEM1
PID_CDC42_REG_PATHWAY	PID_CDC42_REG_PATHWAY	29	0.50466	1.53126	0.0272158	tags=24%, list=4%, signal=23%	ARHGDIA/ARHGEF6/VAV3/GIT1/VAV2/ARHGAP17/ITSN1
REACTOME_TRANSPORT_OF_ORGANIC_ANIONS	REACTOME_TRANSPORT_OF_ORGANIC_ANIONS	11	0.644812	1.53045	0.044484	tags=18%, list=0%, signal=18%	SLCO4A1/SLCO3A1
REACTOME_SIGNALING_BY_FGFR3	REACTOME_SIGNALING_BY_FGFR3	39	0.469972	1.52978	0.0238413	tags=26%, list=13%, signal=22%	SPRY2/SOS1/SRC/CBL/PIK3R1/GAB1/GRB2/PPP2CA/PPP2R1A/FGF20
WP_PHOTODYNAMIC_THERAPYINDUCED_UNFOLDED_PROTEIN_RESPONSE	WP_PHOTODYNAMIC_THERAPYINDUCED_UNFOLDED_PROTEIN_RESPONSE	26	0.515746	1.52918	0.0310074	tags=46%, list=23%, signal=36%	ATF3/PPP1R15A/DDIT3/WARS1/EDEM1/UBE2E1/EIF2AK3/PDIA6/DNAJC3/XBP1/ATF4/CALR
REACTOME_PEXOPHAGY	REACTOME_PEXOPHAGY	11	0.643981	1.52847	0.0462633	tags=45%, list=19%, signal=37%	ATM/NBR1/MAP1LC3B/USP30/RPS27A
JOHANSSON_BRAIN_CANCER_EARLY_VS_LATE_DN	JOHANSSON_BRAIN_CANCER_EARLY_VS_LATE_DN	42	0.462734	1.52826	0.0372069	tags=26%, list=9%, signal=24%	GSTM1/ATP2A2/GRINA/NCDN/ATP1B1/NDRG2/IGFBP4/TEF/CLSTN1/CAMK2G/CALM1
BASAKI_YBX1_TARGETS_DN	BASAKI_YBX1_TARGETS_DN	358	0.342164	1.52819	0.000103119	tags=12%, list=7%, signal=12%	EGR1/FOS/JUNB/BHLHE40/DUSP6/GDF15/HES1/BICD1/ADM/IER2/SPRY1/DUSP5/SPRY2/SF1/GRB7/N4BP2L2/SALL1/UCP2/ATM/SLC30A1/KDM4B/VAV3/HELZ/PFKFB3/SKIL/NCBP3/WIPF2/PIK3R1/TP53INP1/NET1/KRCC1/MARCKSL1/PIAS1/C2orf88/IER5L/TRIM13/STMN3/FAM189A1/KANSL1L/ST3GAL6/SEMA4B/AK4/EIF5/RFX3
KOBAYASHI_EGFR_SIGNALING_24HR_DN	KOBAYASHI_EGFR_SIGNALING_24HR_DN	241	0.35547	1.52784	0.000801404	tags=32%, list=22%, signal=25%	IER3/DUSP6/SLCO4A1/PPIF/DUSP5/ETV1/SLC43A3/CTPS1/SOX9/SLC29A1/SRM/MCM4/FOSL1/TUBA1A/HELLS/TPX2/GPSM2/PSMC3IP/TUBB/UBE2S/FEN1/PKMYT1/ENO2/KIF11/PA2G4/MCM5/KIF23/MCM2/POLA1/NEMP1/PNN/CDCA8/WWTR1/TUBB4B/DSCC1/NOP56/TEX30/TREX2/PRC1/ORC6/DPAGT1/USP1/DKK1/LMNB1/MELK/CCNA2/SPRED2/ESPL1/GINS1/AXL/ZC3HAV1/ZWINT/ASF1B/MKI67/EEF1E1/POLR3K/NUSAP1/TIPIN/CDC25A/ITGA6/ATAD2/AURKA/FAM86C1P/SPHK1/MCM10/MSH2/AURK…
PID_HIF2PATHWAY	PID_HIF2PATHWAY	31	0.491651	1.52705	0.0176388	tags=26%, list=14%, signal=22%	BHLHE40/ADORA2A/MMP14/SERPINE1/EP300/EFNA1/ARNT/VHL
DEBIASI_APOPTOSIS_BY_REOVIRUS_INFECTION_UP	DEBIASI_APOPTOSIS_BY_REOVIRUS_INFECTION_UP	277	0.352267	1.52693	0.000408726	tags=17%, list=12%, signal=15%	DUSP1/CXCL2/JUN/CXCL8/BHLHE40/ATF3/ADM/PPP1R15A/CCN1/SPRY1/ZFP36/NFKBIA/CXCL1/OTUD4/TIAL1/GEM/TAF5/H2BC11/EYA4/KLF6/DNAJB6/TRIM21/RAD1/TIPARP/BCL6/SREBF1/ARPP19/HRK/CREB5/UBE2V2/RLF/BACH1/GADD45A/KPNA5/RSRC2/OGFR/AGFG1/TAF1A/TAC1/DHRS2/FHL2/SHOC2/CLK3/H1-0/CCL5/NF1/DUSP8/PFDN4
DEURIG_T_CELL_PROLYMPHOCYTIC_LEUKEMIA_UP	DEURIG_T_CELL_PROLYMPHOCYTIC_LEUKEMIA_UP	337	0.343942	1.52677	0.000386112	tags=19%, list=11%, signal=17%	IER3/ATF3/PPP1R15A/GSTM1/CEP112/CXCL1/ARHGEF1/AGPAT1/FAM53B/TBC1D10B/WDR62/CLUH/CYP24A1/PKD1/JAG2/ITM2C/CBLL1/SFN/BCL7A/NCDN/ATP1B1/GIT1/MCM4/SLC48A1/FKBP1A/PPP2R5D/MPZL1/COL6A2/KLF6/XKR8/NCBP3/MTAP/IPO4/MARCKSL1/ELL3/IRS1/RHBDD3/SSBP3/CIC/HSP90AB1/GGT1/TP63/H2AC16/HKDC1/MCM2/RPH3AL/CORO1B/TMEM39B/YIPF4/CCNG2/PTP4A3/DDX11/MAD1L1/PRMT1/RAB1B/FCGBP/ST6GALNAC4/RRH/ADK/KCTD12/SLC22A5/MYO1B/LST1/H1-0
WP_ARYL_HYDROCARBON_RECEPTOR_NETPATH	WP_ARYL_HYDROCARBON_RECEPTOR_NETPATH	44	0.458615	1.52516	0.031427	tags=18%, list=7%, signal=17%	TNF/NCOR2/SRC/KLF6/MYC/EP300/HSP90AA1/CYP1A1
BLANCO_MELO_COVID19_SARS_COV_2_INFECTION_A594_CELLS_UP	BLANCO_MELO_COVID19_SARS_COV_2_INFECTION_A594_CELLS_UP	78	0.415079	1.52471	0.00691197	tags=32%, list=21%, signal=26%	CXCL8/ATF3/IL6/DDIT3/IL1B/SCG5/PTPRE/TIPARP/SCN4A/CDCP1/CCL5/TSC22D3/RPS6KA2/RBMS3/TRIM36/KCNQ3/CHAC1/MAP2/SNHG32/GREM1/DNAH17/ARRDC4/GBP4/TMEM156/PARP8
CHIBA_RESPONSE_TO_TSA	CHIBA_RESPONSE_TO_TSA	42	0.461589	1.52448	0.0382194	tags=24%, list=9%, signal=22%	DUSP1/CCN1/BSG/DNAJB1/PKM/SDC4/PNRC1/HADHB/TGM2/DHRS2
ZHOU_INFLAMMATORY_RESPONSE_FIMA_UP	ZHOU_INFLAMMATORY_RESPONSE_FIMA_UP	453	0.33604	1.52407	6.51541e-05	tags=21%, list=17%, signal=18%	CXCL2/TNF/IER3/JUN/CXCL8/IL6/PPP1R15A/NFKBIA/SOD3/CXCL1/RNF19B/NFKB2/MIIP/TNFSF9/SERPINE1/GEM/CLCF1/EDN1/COL3A1/SRC/B4GALT1/OR51B5/IL1B/VAV2/LSS/FOSL1/LEKR1/TACC3/TAOK2/TP53AIP1/BTG2/CSF1/CYTH3/SDC4/TLNRD1/KCNAB1/TMEM217/GOLIM4/TMC6/GRIK2/PNRC1/CCL4/PIM3/NEB/ERC1/CREB5/KIF1B/ARHGAP31/TAB1/NEMP1/KANK1/ZC3H12A/BCL2L1/NIPAL4/C1QTNF7/NYX/STAT5A/DTX2/AKAP5/FAAP20/BRICD5/SAMD10/S1PR3/KLF12/LRP12/COL28A…
REACTOME_EXTRA_NUCLEAR_ESTROGEN_SIGNALING	REACTOME_EXTRA_NUCLEAR_ESTROGEN_SIGNALING	70	0.424454	1.5239	0.0153228	tags=23%, list=13%, signal=20%	FOS/HBEGF/GNAI2/SRC/PIK3R1/HSP90AA1/BCL2/XPO1/CALM1/PRMT1/IGF1R/GNG8/GNG2/S1PR3/AKT1/PIK3R3
REACTOME_SUMOYLATION_OF_TRANSCRIPTION_COFACTORS	REACTOME_SUMOYLATION_OF_TRANSCRIPTION_COFACTORS	40	0.462923	1.52274	0.0275844	tags=38%, list=16%, signal=31%	TRIM28/NCOR2/NCOA1/CBX4/EP300/PIAS1/SCMH1/PHC3/CBX8/NPM1/HIPK2/DDX17/PHC1/SUMO3/ING2
REACTOME_RHOG_GTPASE_CYCLE	REACTOME_RHOG_GTPASE_CYCLE	70	0.423985	1.52222	0.0153228	tags=39%, list=22%, signal=30%	LETM1/EPHA2/ARHGDIA/TRIO/STX5/VAV3/VAV2/ITSN1/PIK3R1/PAK4/ARFGAP3/RHOG/OPHN1/ANKLE2/MCF2L/MAP3K11/MCF2/CAV1/ARHGEF5/DOCK1/MCAM/PAK2/ARHGAP32/ARHGAP5/KALRN/PREX1/GARRE1
WP_IL9_SIGNALING_PATHWAY	WP_IL9_SIGNALING_PATHWAY	17	0.57399	1.52204	0.0432526	tags=41%, list=11%, signal=36%	MAP2K2/PIK3R1/STAT5B/IL9/GRB2/STAT5A/IL9R
REACTOME_CHROMATIN_MODIFYING_ENZYMES	REACTOME_CHROMATIN_MODIFYING_ENZYMES	259	0.35235	1.52191	0.000956827	tags=24%, list=14%, signal=20%	GATAD2B/JADE2/KMT2B/KDM2A/ATXN7L3/GATAD2A/NFKB2/PHF2/ARID2/MTA1/NCOR2/KDM4B/JMJD6/KDM4A/WDR5/EHMT2/NCOA1/KMT2C/TBL1XR1/REST/H2BC11/SUPT20H/MSL1/SAP30L/KMT2E/KANSL1/YEATS2/EP300/PRMT7/SETD1A/TAF5L/GPS2/PRDM9/H2AC16/KDM5C/KMT2D/ELP6/EED/H2BC14/DNMT3A/SAP18/MBD3/H2AX/SMARCD2/PRMT1/H2BC3/KAT6A/TADA2B/JADE3/MTA2/KDM7A/KAT7/SETD1B/MORF4L1/HDAC8/H2BC17/BRMS1/H3C1/KMT2A/NCOR1/TADA2A
NOJIMA_SFRP2_TARGETS_UP	NOJIMA_SFRP2_TARGETS_UP	29	0.501576	1.5219	0.0309149	tags=31%, list=14%, signal=27%	JUN/PPP1R15A/TP53AIP1/CSF1/WARS1/GADD45A/DEDD2/MXD1/VHL
KEGG_ERBB_SIGNALING_PATHWAY	KEGG_ERBB_SIGNALING_PATHWAY	84	0.407459	1.5206	0.00643494	tags=26%, list=15%, signal=22%	JUN/HBEGF/MAP2K2/SOS1/SRC/MAP2K7/CBL/PIK3R1/MYC/PAK4/STAT5B/CAMK2G/GAB1/PIK3CD/GRB2/STAT5A/AKT1/PIK3R3/GSK3B/PAK5/CRKL/PRKCB
REACTOME_REGULATION_OF_LOCALIZATION_OF_FOXO_TRANSCRIPTION_FACTORS	REACTOME_REGULATION_OF_LOCALIZATION_OF_FOXO_TRANSCRIPTION_FACTORS	11	0.640575	1.52039	0.0480427	tags=45%, list=23%, signal=35%	SFN/AKT1/YWHAZ/AKT3/AKT2
PID_PI3KCI_AKT_PATHWAY	PID_PI3KCI_AKT_PATHWAY	34	0.476166	1.52003	0.0443686	tags=32%, list=17%, signal=27%	YWHAE/SFN/SRC/KPNA1/HSP90AA1/BCL2L1/AKT1/MAP3K5/GSK3B/YWHAZ/CASP9
WARTERS_IR_RESPONSE_5GY	WARTERS_IR_RESPONSE_5GY	49	0.447601	1.51903	0.017997	tags=22%, list=10%, signal=20%	ATF3/GDF15/PPM1D/CHADL/BTG2/PIDD1/GDNF/TP53INP1/GADD45A/APP/FAS
BURTON_ADIPOGENESIS_4	BURTON_ADIPOGENESIS_4	44	0.456718	1.51885	0.031427	tags=34%, list=12%, signal=30%	ST3GAL4/ZNF385A/IGFBP4/COL6A2/BCL6/GLUL/SREBF1/ENTPD6/RHOU/NOP2/H2AX/DDX51/NSUN2/COL6A1/CCT3
BIOCARTA_HER2_PATHWAY	BIOCARTA_HER2_PATHWAY	22	0.534153	1.51782	0.044905	tags=64%, list=29%, signal=45%	IL6/SOS1/PIK3R1/EP300/GRB2/IL6R/EGFR/MAPK1/SHC1/GRIP1/PIK3CA/STAT3/RAF1/CARM1
PEREZ_TP63_TARGETS	PEREZ_TP63_TARGETS	325	0.343159	1.51776	0.000527949	tags=23%, list=16%, signal=19%	EGR1/CSRNP1/KLHL21/ZNRF3/APAF1/DLG4/RBM38/CGAS/SMAD7/ARHGEF6/NXF1/METRNL/TAF5/SOCS3/ZNF385A/IL17RB/NLRP1/CYGB/EPB41L3/TNFRSF25/GPT2/ZFYVE1/SEMA4D/SYNE2/MAN1C1/WNT5B/WHRN/SIPA1L2/CRAMP1/CYTH1/PRKCH/MARCHF3/CELF2/VASN/AVIL/HS6ST1/NTN1/GRHL3/KHDRBS3/IGF1R/MAP7/LRRC37A4P/TNPO2/MAP1LC3B/GPATCH2L/GOLGA2P5/CELF3/KDM7A/FOXP4/TNRC6C/DOK4/STK40/PDE4DIP/KLK15/ARRB1/TSC22D3/EPB41L4B/SLC4A11/MICALL2/DEDD2/GAB…
REACTOME_GOLGI_TO_ER_RETROGRADE_TRANSPORT	REACTOME_GOLGI_TO_ER_RETROGRADE_TRANSPORT	129	0.383138	1.51736	0.0038818	tags=29%, list=17%, signal=24%	BICD1/CAPZB/KLC2/GBF1/ARFGAP1/ARF4/TUBA3E/TUBA1A/ARF5/DYNC1H1/KIFC1/KIF11/PLA2G4A/ARF3/ARFGAP3/DCTN1/KIF23/KIF1B/TMED9/SURF4/GALNT2/KIF26B/KIF13B/RAB1B/TUBA3D/TUBB4B/TUBB4A/KIF21A/KLC1/DYNC1LI1/COPZ1/KIF4B/NAPB/NAPA/KIFC2/PAFAH1B2/TUBA3C/KIF25
PID_P73PATHWAY	PID_P73PATHWAY	79	0.412004	1.51728	0.00848835	tags=25%, list=17%, signal=21%	GDF15/BAX/SERPINE1/JAG2/SFN/DEDD/TUBA1A/TP53AIP1/MYC/EP300/FBXO45/TP63/FAS/FASN/NTRK1/CCNA2/WT1/PML/BAK1/MAPK14
KIM_GASTRIC_CANCER_CHEMOSENSITIVITY	KIM_GASTRIC_CANCER_CHEMOSENSITIVITY	91	0.399889	1.51706	0.00966627	tags=40%, list=22%, signal=31%	CHKA/KDM4B/EHMT2/ELK4/CRTC1/SGTA/MPZL1/SLC26A6/NME4/FKBP8/DOHH/BAIAP2/BCL2/MOCS3/ARMC6/AATK/ANGEL1/PPP2R1A/DPAGT1/HHLA1/POLR2A/BORCS6/TADA2A/IFRD2/RPL13A/FOXD4/ABCB8/FABP7/TSHZ2/GLYR1/NCAM1/N4BP2L1/OMP/PPP1R12B/ZNF219/B3GAT3
OZEN_MIR125B1_TARGETS	OZEN_MIR125B1_TARGETS	20	0.546065	1.51689	0.0372609	tags=60%, list=19%, signal=49%	CASC3/CBFB/TP53INP1/SMARCD2/ATXN1/SAMD10/LACTB/KCNS3/SLC7A1/MKNK2/EIF4EBP1/SLC7A6
BROWNE_HCMV_INFECTION_16HR_UP	BROWNE_HCMV_INFECTION_16HR_UP	207	0.358275	1.51602	0.00182169	tags=34%, list=24%, signal=26%	EPHA2/RNF19B/ATRN/PIP5K1A/FXR2/ISL1/SOS1/B3GALT5/ALKBH1/DDX10/PTPRE/RNF40/RGS3/ENO2/DOHH/NACAD/NUP153/TESK2/WDR82/AKAP8L/EED/DFFB/POU2F1/TRAF3/KPNA5/NR2C2/SLC6A8/KHDRBS3/RFK/DTNB/TEX30/WDR47/FAM169A/TRIM33/HLTF/ANKRD40/PLCL1/DUSP7/RMND5A/NECAP1/DDX21/DCAF7/HSPA2/DLG3/SLC7A1/ARHGEF5/RAP2A/BAK1/GABRE/MPP6/N4BP2L1/PDE4D/PLS1/CLCN5/IGSF3/KPNA6/WHAMM/PTPN21/SETD2/SFMBT1/NAT1/PLEKHB2/PRKCD/RORA/BTRC/CD…
GRADE_COLON_VS_RECTAL_CANCER_DN	GRADE_COLON_VS_RECTAL_CANCER_DN	49	0.44623	1.51438	0.0182418	tags=29%, list=13%, signal=25%	BICD1/TAGLN2/PHLDA1/SLC30A1/CPSF7/EPB41L3/KMT2E/POLL/AP5Z1/PCSK1N/ANGEL1/KLK15/ANKRD40/DUSP7
GENTILE_UV_HIGH_DOSE_DN	GENTILE_UV_HIGH_DOSE_DN	273	0.35037	1.51415	0.000618027	tags=28%, list=19%, signal=23%	DUSP1/BHLHE40/ATF3/HBEGF/NAV3/CCN1/ZFP36/DUSP5/ATP2A2/KLF10/SMAD7/MTMR3/GEM/JMJD6/PUM2/MLX/DICER1/SAMD4A/FBXO46/ID1/TLK2/NFIL3/TIPARP/AMD1/NUP153/SMAD3/LHFPL2/TRIM13/KIF23/RNF4/PNN/TNFAIP8/BACH1/GADD45A/DDIT4/XPO1/KANK1/SERTAD2/FSTL3/GAS1/ATP6V1B2/HMGXB4/TSC22D3/TNFRSF1A/ELF4/PXDC1/PKP4/NDUFV2/USP1/DUSP7/HAS2/DDX17/DKK1/TRIB2/SPEN/MCL1/CRKL/RABGAP1/CUL1/MBD2/GINS1/TLE1/TM4SF1/LPAR1/DYRK1A/COL13A1…
BRUINS_UVC_RESPONSE_VIA_TP53_GROUP_C	BRUINS_UVC_RESPONSE_VIA_TP53_GROUP_C	84	0.405446	1.51309	0.0071306	tags=23%, list=10%, signal=20%	AGRN/KLF10/ATP6V0C/SLC16A13/GEM/UBA1/SOCS3/SDC4/TLNRD1/BMPR1B/ENTPD6/ERI1/PSD3/SHKBP1/KCNQ4/DHRS2/FAM210B/BVES/GCH1
KARLSSON_TGFB1_TARGETS_DN	KARLSSON_TGFB1_TARGETS_DN	185	0.362449	1.51274	0.00373532	tags=28%, list=15%, signal=24%	GSTM1/CTSZ/BSG/EPHX1/LY6E/MAGED1/GRINA/SUPT6H/SLC48A1/IGFBP4/ID1/DNAJA1/BET1L/KMT2E/PIK3R1/NET1/WARS1/SYNE2/MAF1/RGS10/GLUL/TMEM132A/PNRC1/TLE5/NBR1/GDI1/DNMT3A/TBC1D2B/GAA/TGM2/SMPDL3B/WWTR1/ACBD4/AGAP1/TPI1/UPF3B/ANAPC1/WBP2/COL6A1/GAS1/H1-0/DUSP8/CST3/SLC10A6/TLCD3A/POLR2A/CTNNBIP1/ARNT/RSRP1/TIMP2/ITM2B
REACTOME_L1CAM_INTERACTIONS	REACTOME_L1CAM_INTERACTIONS	117	0.384741	1.51221	0.00691517	tags=28%, list=16%, signal=24%	L1CAM/DLG4/MAP2K2/SPTBN4/SCN5A/SRC/VAV2/TUBA3E/TUBA1A/MSN/DNM2/AP2A1/AP2A2/SCN9A/NUMB/EPHB2/SCN1A/SCN4A/SCN1B/SPTAN1/TUBA3D/TUBB4B/TUBB4A/AP2M1/SHTN1/CSNK2A1/RPS6KA2/LAMB1/AP2S1/DLG3/RPS6KA3/KIF4B/KCNQ3
WEIGEL_OXIDATIVE_STRESS_BY_HNE_AND_H2O2	WEIGEL_OXIDATIVE_STRESS_BY_HNE_AND_H2O2	34	0.47366	1.51203	0.0494881	tags=29%, list=15%, signal=25%	JUN/SPRY2/ARHGDIA/MYC/MARCKSL1/NFE2L1/CDKN2D/TSC2/CSNK1G2/ITGA7
KEGG_PHOSPHATIDYLINOSITOL_SIGNALING_SYSTEM	KEGG_PHOSPHATIDYLINOSITOL_SIGNALING_SYSTEM	75	0.412802	1.51173	0.011682	tags=37%, list=24%, signal=29%	PIP5K1A/PIK3C2A/DGKD/CDS2/PIK3R1/PIP5K1C/INPP5K/CDIPT/DGKA/PIP4K2A/PIP5K1B/PIP4K2B/PIK3CD/CALM1/PIK3R3/INPP5A/DGKH/IPPK/ITPK1/PRKCB/INPPL1/PLCD3/DGKE/INPP5E/INPP5J/CALM2/ITPR1/PIK3CA
JOHNSTONE_PARVB_TARGETS_3_UP	JOHNSTONE_PARVB_TARGETS_3_UP	398	0.335915	1.51172	0.000157167	tags=24%, list=16%, signal=21%	BHLHE40/AGRN/DUSP5/SYVN1/L1CAM/NFKBIA/PTPN23/KLF10/BCL9L/ATP6V0C/RETSAT/TRIO/VPS18/ABHD12/ATM/FLNB/MTA1/SLC30A1/S100A16/SUPT6H/VAV2/ZNF703/ARFGAP1/TOX2/ATL1/DYNC1H1/CSF1/RBCK1/PTPRE/KLF6/PLBD2/KCTD2/CMTM3/TGIF1/WIPF2/ERRFI1/MYH9/ENO2/HNMT/EIF4G1/PRKD2/GATAD1/SMAD3/TMC6/PNRC1/PEG10/GDI1/SUPT5H/EPCAM/DPP7/TAPBP/PPDPF/LMTK2/NFE2L1/ATP1A1/SEMA4B/HLA-DRB1/DDIT4/WDR45/JUP/GAA/TGM2/CALM1/ATP2B4/BCL3/PRP…
WP_WNT_SIGNALING	WP_WNT_SIGNALING	113	0.387566	1.51043	0.0059342	tags=25%, list=15%, signal=21%	JUN/VANGL2/CSNK1E/SENP2/NFATC3/WIF1/CXXC4/FOSL1/MYC/LRP5/DVL1/FRAT1/FZD5/WNT5B/CAMK2G/DVL3/WNT10A/WNT4/NKD2/CHD8/PPP3R1/CSNK2A1/GSK3B/DKK1/CTNNBIP1/TCF7L1/PRKCB/DKK2
HENDRICKS_SMARCA4_TARGETS_UP	HENDRICKS_SMARCA4_TARGETS_UP	52	0.440231	1.51025	0.0146937	tags=21%, list=9%, signal=19%	JUN/FLNB/MT1H/IGFBP4/EMP3/HKDC1/EPHB2/GADD45A/ITGA3/ATP2B4/FHL2
TONKS_TARGETS_OF_RUNX1_RUNX1T1_FUSION_SUSTAINED_IN_MONOCYTE_UP	TONKS_TARGETS_OF_RUNX1_RUNX1T1_FUSION_SUSTAINED_IN_MONOCYTE_UP	19	0.550707	1.50997	0.0179682	tags=21%, list=7%, signal=20%	DUSP6/GDF15/CSF1/CYP1A1
SHETH_LIVER_CANCER_VS_TXNIP_LOSS_PAM2	SHETH_LIVER_CANCER_VS_TXNIP_LOSS_PAM2	156	0.366996	1.50917	0.00720527	tags=22%, list=14%, signal=20%	IER3/DUSP6/ATF3/DDIT3/TAGLN2/DLG4/CLCF1/ABCC5/TWF2/PFKFB3/UAP1L1/TACC3/BTG2/PTPRE/SLC12A4/MYO9B/DIP2B/ARHGAP12/MCM2/DMC1/AGFG1/SMPDL3B/CERK/APP/WNT10A/POFUT2/RPAP3/MYADM/HID1/AJUBA/COMTD1/EIF2AK3/ROGDI/ACBD3/NPDC1
OSADA_ASCL1_TARGETS_DN	OSADA_ASCL1_TARGETS_DN	24	0.518049	1.50894	0.0358841	tags=12%, list=2%, signal=12%	DUSP1/CYP24A1/SOCS3
ZHENG_FOXP3_TARGETS_IN_T_LYMPHOCYTE_DN	ZHENG_FOXP3_TARGETS_IN_T_LYMPHOCYTE_DN	35	0.469103	1.50878	0.0436489	tags=46%, list=24%, signal=35%	PTK2B/SYNE2/WNK1/BCL2/CLEC2D/ABTB2/NIPBL/PTGER3/BACH2/CDK17/LEF1/BCL11B/PELI1/ST8SIA1/DPH5/MS4A4A
PID_P38_ALPHA_BETA_PATHWAY	PID_P38_ALPHA_BETA_PATHWAY	29	0.49698	1.50795	0.0346141	tags=17%, list=3%, signal=17%	DUSP1/SRC/MAP3K3/DUSP10/LCK
PID_ECADHERIN_KERATINOCYTE_PATHWAY	PID_ECADHERIN_KERATINOCYTE_PATHWAY	19	0.54993	1.50784	0.0182231	tags=37%, list=12%, signal=32%	PIP5K1A/SRC/ZYX/PIK3R1/JUP/AKT1/AJUBA
REACTOME_TP53_REGULATES_TRANSCRIPTION_OF_GENES_INVOLVED_IN_CYTOCHROME_C_RELEASE	REACTOME_TP53_REGULATES_TRANSCRIPTION_OF_GENES_INVOLVED_IN_CYTOCHROME_C_RELEASE	18	0.559069	1.50773	0.0448446	tags=28%, list=6%, signal=26%	BAX/ATM/TP53AIP1/TP53INP1/TP63
ROSS_ACUTE_MYELOID_LEUKEMIA_CBF	ROSS_ACUTE_MYELOID_LEUKEMIA_CBF	74	0.412543	1.50649	0.0129014	tags=31%, list=18%, signal=26%	JUNB/DUSP6/CLIP2/TRIO/CD52/KDM4B/SLC25A1/CBFB/EGFL7/CD34/PSD3/ATP2B4/RCBTB1/CIAO3/DNMT3B/RUNX1T1/HOMER2/CAV1/PRAME/LAT2/MKNK2/ITGB4/CRIP2
STARK_PREFRONTAL_CORTEX_22Q11_DELETION_UP	STARK_PREFRONTAL_CORTEX_22Q11_DELETION_UP	192	0.359145	1.50613	0.00389984	tags=33%, list=22%, signal=26%	SMG7/NFIX/DLG4/TIAL1/ACIN1/CHKA/NACC2/ATN1/CBLL1/SRC/NCDN/SAFB2/DGKD/PTK2B/CYGB/TEF/SPOCK2/PIK3R1/RBM25/DNM2/MYH9/TTYH3/USP7/CPEB2/WNK1/AJM1/RHOU/SAMD12/NR2C2/MINK1/SHOC2/MYCBP2/IGF1R/TNPO2/R3HDM1/LPIN2/GPRIN1/ANKRD11/TCAF1/GSK3B/CD99L2/RNF165/RPL22/PYGM/RSF1/TMEM178B/SEMA6B/TIMP2/ASAP1/PTPRJ/MIA3/DAB2IP/CNR1/LENG8/MAPRE2/LSM11/ATP2B1/CREG2/SNTB2/BIN1/BRD1/B3GAT1/RALGAPA1/NTM
BIOCARTA_HIVNEF_PATHWAY	BIOCARTA_HIVNEF_PATHWAY	50	0.442392	1.50494	0.0298719	tags=34%, list=14%, signal=29%	TNF/NFKBIA/APAF1/NUMA1/MAP2K7/TRAF2/BCL2/TRADD/DFFB/SPTAN1/FAS/PSEN2/TNFRSF1A/RASA1/MAP3K5/LMNB1/BIRC3
BLANCO_MELO_BETA_INTERFERON_TREATED_BRONCHIAL_EPITHELIAL_CELLS_UP	BLANCO_MELO_BETA_INTERFERON_TREATED_BRONCHIAL_EPITHELIAL_CELLS_UP	334	0.339507	1.5046	0.000560445	tags=16%, list=11%, signal=15%	DUSP1/CXCL2/CXCL8/GDF15/IL6/HBEGF/CSRNP1/NAV3/SPRY2/CORO2B/ADAMTS1/PHLDA1/RNF19B/SPSB1/EDN1/DCP1A/SOCS3/ELK4/SKIL/PTK2B/SCG5/TAP2/SREK1IP1/CSF1/SYT12/PTPRE/KLF6/SDC4/TRIM21/RELL1/TMEM217/REPS2/CPEB2/RIMS2/TMEM229B/CREB5/GALM/EIF5/BACH1/CAB39/OGFR/CCNG2/TGM2/CSGALNACT2/IRF2/B3GNT7/BMPR2/FAS/KCTD12/ADAR/WNT10A/CDCP1/STAT5A/PARP12/TMEM106A
YAMASHITA_LIVER_CANCER_STEM_CELL_UP	YAMASHITA_LIVER_CANCER_STEM_CELL_UP	44	0.452326	1.50424	0.0349468	tags=34%, list=17%, signal=28%	DUSP1/GRB7/CSNK1E/MAP2K2/SOX9/FZD5/GADD45A/MAP3K5/DKK1/MERTK/ASAP1/YWHAZ/ARPC5L/BAK1/MYLK
GAUSSMANN_MLL_AF4_FUSION_TARGETS_E_UP	GAUSSMANN_MLL_AF4_FUSION_TARGETS_E_UP	97	0.395097	1.50308	0.0104234	tags=24%, list=14%, signal=20%	FOS/ADM/L1CAM/ATP1B1/PDE10A/PLB1/SORCS2/MAN1C1/CARNS1/TBX20/CD34/NTN1/NIPAL4/BVES/KCTD12/FLRT3/MYO1B/YIPF5/CCL5/AKIP1/ZC2HC1A/HAS2/SORBS2
REACTOME_INTRACELLULAR_SIGNALING_BY_SECOND_MESSENGERS	REACTOME_INTRACELLULAR_SIGNALING_BY_SECOND_MESSENGERS	291	0.344875	1.50283	0.000790994	tags=26%, list=18%, signal=21%	EGR1/IER3/JUN/HBEGF/GATAD2B/HDAC7/GATAD2A/PIP5K1A/MTA1/ATN1/SRC/REST/LCK/PPP2R5D/CBX4/PIK3R1/AKT1S1/IRS1/USP7/MAF1/SCMH1/PIP5K1C/RHOG/ADCY6/GAB2/PRR5/PHC3/PIP4K2A/PIP5K1B/STUB1/PRKX/EED/CAMK4/PIP4K2B/CAMK2G/GAB1/MBD3/PIK3CD/CALM1/CBX8/GRB2/PPP2CA/ADCY9/TSC2/MTA2/FGF6/TNRC6C/PRKAR1B/AKT1/PPP2R1A/PSMA8/FGF20/PIK3R3/CSNK2A1/GSK3B/PREX2/PDGFB/PSMD6/PSMD3/PRKACG/PHC1/AGO4/ADCY1/RHEB/PSMB8/RNF146/FGFR4…
HELLER_SILENCED_BY_METHYLATION_DN	HELLER_SILENCED_BY_METHYLATION_DN	97	0.394971	1.5026	0.0104234	tags=34%, list=22%, signal=27%	ATF3/GDF15/PPP1R15A/DDIT3/DNAJB1/PKD1/PLTP/MYC/WARS1/SERPINH1/DDIT4/SEC24D/SLC5A3/RPS6KA2/ADCYAP1/HMOX1/TSHR/TXNDC5/EPB41L2/CHAC1/EIF4EBP1/OSGIN1/MARS1/TIMM44/MIA2/USH2A/AMY1A/UFM1/HBB/ENPP2/MMP16/ATF4/MAFF
DANG_REGULATED_BY_MYC_DN	DANG_REGULATED_BY_MYC_DN	238	0.349087	1.50166	0.00156309	tags=22%, list=15%, signal=19%	DUSP1/IER3/DUSP6/HBEGF/ADM/PPP1R15A/DDIT3/MT1A/FBLN5/PYCR1/SERPINE1/MLF2/EDN1/SFN/COL3A1/ARF4/PLA1A/MSN/MYC/ERRFI1/GDI1/FADS2/ACP5/GPC1/PDLIM7/NPPB/GADD45A/ARHGAP25/CCNG2/GAA/TCTA/SPTAN1/PTPRN/RSAD2/APP/FAS/GAS1/MYO1B/AKT1/TSPAN7/ZXDB/SCAMP1/PDGFB/HMOX1/VHL/PIM1/TIMP2/FN1/ITM2B/PTPA/NUCB1/CAV1/COL1A2
REACTOME_DISEASES_OF_CARBOHYDRATE_METABOLISM	REACTOME_DISEASES_OF_CARBOHYDRATE_METABOLISM	31	0.483347	1.50126	0.0220162	tags=29%, list=13%, signal=25%	LCT/IDUA/ARSB/SGSH/G6PC3/KHK/GAA/RPIA/GYG2
FERNANDEZ_BOUND_BY_MYC	FERNANDEZ_BOUND_BY_MYC	172	0.361933	1.50108	0.00368233	tags=27%, list=19%, signal=22%	CXCL2/JUN/JUNB/UCP3/SLC4A2/BAX/BSG/EPHX1/CLDND1/SERPINE1/FOXM1/ARF4/NAB2/MEN1/MSN/PLA2G4A/AMD1/BCL2/SLC19A1/LTB/TPM2/TERT/IRF2/BCL3/APP/ACOX1/NTN3/DKC1/GSK3B/RPL22/HMOX1/MCL1/VHL/IFRD2/RPL13A/FGFR4/CD63/WT1/FPGS/CFDP1/CASP9/SRD5A1/CTSF/ITGA6/GPR4/SIM2
MANNE_COVID19_ICU_VS_HEALTHY_DONOR_PLATELETS_UP	MANNE_COVID19_ICU_VS_HEALTHY_DONOR_PLATELETS_UP	116	0.381302	1.50034	0.0111207	tags=34%, list=20%, signal=27%	MIIP/LY6E/SRM/CERCAM/IDUA/MAPRE3/PLBD2/LTBR/MMP17/SERPINH1/FAM83H/MGAT5B/TAPBP/CACFD1/MBOAT7/TPM2/FAM174C/RSAD2/STARD7/SHISA4/MRPL12/RNF213/POR/IL1R2/ROGDI/OBSL1/FAM160B2/TSPAN4/METRN/FOLR3/ADGRG3/KIFC2/ITPKC/APLP1/IFITM3/MPP6/EME1/LGALS3BP/CTSW
WP_ESC_PLURIPOTENCY_PATHWAYS	WP_ESC_PLURIPOTENCY_PATHWAYS	115	0.382247	1.50002	0.00841502	tags=23%, list=14%, signal=19%	FOS/JUN/SMAD7/MAP2K2/SOS1/MAPK7/MAP2K5/LRP5/DVL1/FZD5/WNT5B/BMPR1B/GAB1/PIK3CD/DVL3/WNT9B/BMPR2/GRB2/WNT10A/WNT4/FGF6/AKT1/FGF20/GSK3B/PDGFB/MAP2K3
KYNG_DNA_DAMAGE_BY_GAMMA_RADIATION	KYNG_DNA_DAMAGE_BY_GAMMA_RADIATION	74	0.410499	1.49902	0.0145584	tags=24%, list=14%, signal=21%	HBEGF/RNF168/HELZ/FBLN1/PRG2/CACNA1I/NDEL1/MYO5B/PFN1/STAT5B/FOLH1/RAB1B/PPP2CA/HSF2/PDE4DIP/INSL4/ARNT/DSC2
WP_APOPTOSIS_MODULATION_AND_SIGNALING	WP_APOPTOSIS_MODULATION_AND_SIGNALING	87	0.400507	1.49812	0.00968609	tags=32%, list=18%, signal=27%	FOS/JUN/NFKBIA/BAX/APAF1/MADD/PIDD1/TNFRSF25/TOLLIP/BCL2/HRK/TRADD/DFFB/TRAF3/TNFRSF10B/BCL2L1/FAS/CAPNS1/IL1R2/TNFRSF1A/MAP3K5/MCL1/BIRC3/IRAK1/BAK1/CASP9/HTRA2/NAIP
PETRETTO_HEART_MASS_QTL_CIS_UP	PETRETTO_HEART_MASS_QTL_CIS_UP	28	0.496808	1.49769	0.0273123	tags=14%, list=4%, signal=14%	BHLHE40/TRIO/PLEC/NET1
WP_16P112_PROXIMAL_DELETION_SYNDROME	WP_16P112_PROXIMAL_DELETION_SYNDROME	69	0.417507	1.4973	0.0123872	tags=33%, list=15%, signal=28%	KCTD13/GDPD3/C16orf54/KMT2C/PPP4R2/PPP2R5D/TAOK2/TRAF2/MAZ/MSN/PAGR1/CDIPT/KMT2D/CORO1A/BPTF/PPP2CA/PAXIP1/CDIPTOSP/PPP2R1A/CCT3/INO80E/MAP2K3/SEZ6L2
REACTOME_HSF1_DEPENDENT_TRANSACTIVATION	REACTOME_HSF1_DEPENDENT_TRANSACTIVATION	37	0.46602	1.49713	0.0424053	tags=32%, list=14%, signal=28%	DNAJB1/DNAJB6/AKT1S1/EP300/HSP90AA1/HSP90AB1/SERPINH1/CAMK2G/HSPB2/DEDD2/HSPA2/GML
PACHER_TARGETS_OF_IGF1_AND_IGF2_UP	PACHER_TARGETS_OF_IGF1_AND_IGF2_UP	34	0.468636	1.49599	0.0494881	tags=32%, list=17%, signal=27%	BHLHE40/GDF15/DDIT3/SESN2/GADD45A/SEC24D/SERTAD2/MFAP3L/TFF3/SFMBT2/NELL2
PID_TNF_PATHWAY	PID_TNF_PATHWAY	43	0.449245	1.49598	0.0410035	tags=30%, list=15%, signal=26%	TNF/MAP3K3/MAP2K7/MADD/TRAF2/TRADD/RFFL/TAB1/TNFRSF1A/MAP3K5/BIRC3/MAP2K3/CAV1
REACTOME_INTERLEUKIN_RECEPTOR_SHC_SIGNALING	REACTOME_INTERLEUKIN_RECEPTOR_SHC_SIGNALING	26	0.504494	1.49582	0.0383032	tags=50%, list=24%, signal=38%	SOS1/PIK3R1/GAB2/PIK3CD/GRB2/IL3/PIK3R3/INPPL1/IL5/SHC1/PIK3CA/CSF2RA/PTPN6
LINDVALL_IMMORTALIZED_BY_TERT_DN	LINDVALL_IMMORTALIZED_BY_TERT_DN	71	0.414867	1.49438	0.0117877	tags=14%, list=8%, signal=13%	EGR1/ADM/CCN1/SLC43A3/CXCL1/ADAM12/ENO2/LHFPL2/CTSK/CELF2
REACTOME_FLT3_SIGNALING_IN_DISEASE	REACTOME_FLT3_SIGNALING_IN_DISEASE	27	0.499014	1.49391	0.0450607	tags=41%, list=19%, signal=33%	SOS1/CBL/PIK3R1/GAB2/STAT5B/BCL2L1/GRB2/STAT5A/PIM1/RPS27A/ETV6
YAO_HOXA10_TARGETS_VIA_PROGESTERONE_UP	YAO_HOXA10_TARGETS_VIA_PROGESTERONE_UP	72	0.412513	1.49385	0.0163447	tags=21%, list=7%, signal=19%	ADM/SERTAD1/GDPD3/KLF10/GEM/NDRG2/ID1/PIK3R1/PAGR1/LTF/KCNAB1/GAS6/CHERP/BCL2/AKAP8L
REACTOME_SIGNALING_BY_FGFR1	REACTOME_SIGNALING_BY_FGFR1	49	0.440092	1.49355	0.0209352	tags=39%, list=24%, signal=29%	SPRY2/SOS1/SRC/CBL/PIK3R1/GAB1/GRB2/PPP2CA/FLRT3/FGF6/PPP2R1A/FGF20/SPRED2/RPS27A/FGFRL1/MAPK1/SHC1/PIK3CA/FGFR1
DAZARD_RESPONSE_TO_UV_SCC_UP	DAZARD_RESPONSE_TO_UV_SCC_UP	97	0.39247	1.49309	0.0116012	tags=14%, list=8%, signal=13%	FOS/CXCL2/TNF/CXCL8/ATF3/IL6/CXCL1/IL1B/HSP90AB1/RTN4/TPGS2/ANAPC15/GADD45A/SRSF1
REACTOME_NEGATIVE_REGULATION_OF_FGFR4_SIGNALING	REACTOME_NEGATIVE_REGULATION_OF_FGFR4_SIGNALING	31	0.480635	1.49283	0.0238187	tags=35%, list=22%, signal=28%	SPRY2/SRC/CBL/GRB2/PPP2CA/FGF6/PPP2R1A/FGF20/FGFR4/RPS27A/MAPK1
HAN_SATB1_TARGETS_UP	HAN_SATB1_TARGETS_UP	399	0.331714	1.49282	0.000220609	tags=21%, list=14%, signal=18%	DUSP1/CXCL8/BHLHE40/IL6/ADM/KISS1/CTSZ/CXCL1/N4BP2L2/ATRN/UCP2/ATM/TSC1/NACC2/SLC30A1/SFN/MYL9/TTC38/IL1B/LSS/CDS2/UAP1L1/DDX10/FKBP1A/PDE10A/FBXO10/COL6A2/CRY1/RBCK1/PTPRE/DNAJB6/CSPG5/SAP30L/EPB41L3/MICALL1/ENO2/LDOC1/ARFGAP3/ADGRG6/TMEM132A/GGT1/SERPINH1/RIMS2/LATS1/ST3GAL6/CHST3/AK4/CD34/ATP13A2/PPME1/EVI2B/CCNG2/DDIT4/PACSIN2/SQLE/DENND1A/IL32/PIK3CD/DESI1/PRKAG2/CERK/AHI1/SGPL1/SHOC2/PYROXD…
REACTOME_PI_METABOLISM	REACTOME_PI_METABOLISM	77	0.405623	1.49259	0.0113933	tags=27%, list=14%, signal=24%	GDPD3/MTMR3/PIP5K1A/PIK3C2A/PIK3R6/VAC14/PIK3R1/ARF3/MTMR2/PIP5K1C/INPP5K/PIP4K2A/PIP5K1B/TNFAIP8/PIP4K2B/RUFY1/PIK3CD/TPTE2/MTM1/PIK3R3/GDPD5
WP_CONSTITUTIVE_ANDROSTANE_RECEPTOR_PATHWAY	WP_CONSTITUTIVE_ANDROSTANE_RECEPTOR_PATHWAY	29	0.491837	1.49235	0.0388417	tags=34%, list=15%, signal=29%	DNAJC7/NCOA1/SMC1A/HSP90AA1/UGT1A4/RXRA/NCOA6/NR1I3/SULT1A1/PTPA
DURAND_STROMA_NS_UP	DURAND_STROMA_NS_UP	156	0.362827	1.49203	0.00915553	tags=24%, list=18%, signal=20%	DUSP6/GDF15/BICD1/SPRY4/SLC16A13/TNFSF9/UCP2/RBPMS/WNK3/MYL9/MT1X/PEBP1/HLA-A/FRAT1/CTSK/CREB5/LLGL2/DMPK/OSR1/PRKAG2/STXBP2/RALGAPA2/GCH1/PCDH9/BNC1/LPCAT4/S1PR3/SH3RF3/PREX2/EPOR/ATOH8/DNPH1/SH3BP5/TMEM109/TMEM266/SRD5A1/REXO4/NAIP
REACTOME_DEFECTIVE_B4GALT7_CAUSES_EDS_PROGEROID_TYPE	REACTOME_DEFECTIVE_B4GALT7_CAUSES_EDS_PROGEROID_TYPE	19	0.544119	1.49191	0.0215363	tags=21%, list=7%, signal=20%	AGRN/SDC4/CSPG5/GPC1
JINESH_BLEBBISHIELD_VS_LIVE_CONTROL_UP	JINESH_BLEBBISHIELD_VS_LIVE_CONTROL_UP	360	0.333622	1.49057	0.000404744	tags=21%, list=15%, signal=18%	EGR1/FOS/DUSP1/GDF15/CSRNP1/FOSB/DDIT3/CCN1/SERTAD1/SULT1A2/GCLM/SOX9/MIB2/WFIKKN1/PIK3C2A/PPM1D/NXF1/KHDC4/RECQL4/CCDC125/MAPK8IP3/SNHG7/CBX4/PIDD1/SAC3D1/GSDMB/KREMEN2/GPT2/CUL9/HNMT/IER5L/GAS6/GLUL/TRIM13/CDAN1/DHRS9/SESN2/CHTF18/NAP1L4/DMC1/EIF5/LRRC37B/GADD45A/RHOT2/DDIT4/LILRB1/PIP4K2B/GLS2/SLC4A5/UPF2/DDX51/H2BC3/AADAC/NOP56/TDG/NPIPB13/ZNF394/H1-0/GRIN2C/RNF213/BRICD5/TSC22D3/TDP1/ANKRD11…
REACTOME_ATTENUATION_PHASE	REACTOME_ATTENUATION_PHASE	27	0.497852	1.49043	0.0485269	tags=37%, list=14%, signal=32%	DNAJB1/DNAJB6/EP300/HSP90AA1/HSP90AB1/SERPINH1/HSPB2/DEDD2/HSPA2/GML
WP_VEGFAVEGFR2_SIGNALING_PATHWAY	WP_VEGFAVEGFR2_SIGNALING_PATHWAY	418	0.330105	1.48973	0.000121705	tags=25%, list=17%, signal=21%	EGR1/JUN/CXCL8/HBEGF/CCN1/DUSP5/NFKBIA/ADAMTS1/SLC25A25/EPHA2/HDAC7/YWHAE/BSG/CAPZB/MAP2K2/STIP1/MMP14/FLNB/FXR2/SRC/VAV2/ARF4/MAP2K7/HYOU1/CBL/PTK2B/TMOD3/SHB/TAOK2/LIMK1/CSRP1/DNAJA1/LUC7L/PPP1CA/PIK3R1/TNFRSF25/MYH9/PLA2G4A/AKT1S1/ARRB2/EIF4G1/PRKD2/AP2A1/HSP90AA1/BCL2/INPP5K/TMEM170A/NUMB/SH3BGRL3/EPHB2/PFN1/GPC1/KANK1/GAB1/S1PR1/BCL2L1/SET/NEXN/GRB2/GIPC1/FHL2/LRRFIP2/FAS/WASF1/FGG/SRP54/ENG…
ZHU_CMV_8_HR_UP	ZHU_CMV_8_HR_UP	38	0.45891	1.48972	0.0436242	tags=24%, list=12%, signal=21%	EGR1/IL6/DNAJA1/TRIM21/PLA2G4A/WARS1/IRF2/GCH1/CCL5
REACTOME_SIGNALING_BY_FGFR2_IN_DISEASE	REACTOME_SIGNALING_BY_FGFR2_IN_DISEASE	39	0.457647	1.48966	0.0347344	tags=31%, list=14%, signal=27%	SOS1/GTF2F2/PIK3R1/GAB1/POLR2J/GRB2/FGF6/POLR2C/NCBP2/FGF20/POLR2B/POLR2A
KIM_WT1_TARGETS_12HR_UP	KIM_WT1_TARGETS_12HR_UP	157	0.361822	1.48853	0.00735645	tags=29%, list=18%, signal=24%	JUNB/GDF15/HBEGF/ADM/GFPT1/ARHGDIA/SOX9/SERPINE1/DNAJB1/SUPT6H/MYL9/ATP1B1/CS/VPS37B/CRY1/CSF1/MICALL1/ENO2/SMAD3/GGT1/SERPINH1/PRKCH/HHLA3/NPPB/DDIT4/PSD3/ATP2B4/NYNRIN/ADORA1/DOK4/PIK3R3/EPOR/TRIB2/TULP3/TLE3/CALCOCO1/TIAF1/SH3BP5/WT1/TM4SF1/BAK1/MYLK/MED13L/HEG1/PTPN20
REACTOME_COPI_MEDIATED_ANTEROGRADE_TRANSPORT	REACTOME_COPI_MEDIATED_ANTEROGRADE_TRANSPORT	98	0.391519	1.48844	0.00796268	tags=28%, list=17%, signal=23%	CAPZB/SPTBN4/STX5/GBF1/ARFGAP1/ARF4/TUBA3E/TUBA1A/ARF5/DYNC1H1/BET1L/ARF3/ARFGAP3/DCTN1/TMED9/RAB1B/SPTAN1/TUBA3D/TUBB4B/TUBB4A/COG7/DYNC1LI1/COPZ1/GOLGA2/NAPB/NAPA/TUBA3C
REACTOME_SIGNALING_BY_PDGF	REACTOME_SIGNALING_BY_PDGF	58	0.426005	1.48703	0.0116493	tags=28%, list=15%, signal=23%	GRB7/FURIN/SOS1/COL3A1/SRC/COL6A2/PIK3R1/COL9A2/STAT5B/GRB2/STAT5A/COL6A1/RASA1/PDGFB/CRKL/BCAR1
LIN_NPAS4_TARGETS_DN	LIN_NPAS4_TARGETS_DN	65	0.42089	1.4864	0.0214601	tags=17%, list=10%, signal=15%	EGR1/IER2/SERTAD1/DICER1/GALNT18/CPNE7/ERRFI1/ITPRIP/ETV3/FHL2/FAM210B
REACTOME_PLATELET_CALCIUM_HOMEOSTASIS	REACTOME_PLATELET_CALCIUM_HOMEOSTASIS	26	0.501303	1.48636	0.0467938	tags=38%, list=19%, signal=31%	ATP2A2/ORAI1/ATP2A3/CALM1/ATP2B4/STIM1/P2RX3/P2RX6/ATP2B2/ATP2B1
VARELA_ZMPSTE24_TARGETS_UP	VARELA_ZMPSTE24_TARGETS_UP	40	0.451576	1.48542	0.0365304	tags=28%, list=9%, signal=25%	ATF3/NCDN/BTG2/MYC/ERF/BAIAP2/CYP26A1/PIM3/GADD45A/DDIT4/BCL2L1
VALK_AML_CLUSTER_1	VALK_AML_CLUSTER_1	26	0.500671	1.48448	0.0485269	tags=15%, list=6%, signal=15%	JUN/ATF3/ADGRG6/PROM1
ONDER_CDH1_TARGETS_2_DN	ONDER_CDH1_TARGETS_2_DN	439	0.32719	1.48448	0.000172932	tags=19%, list=15%, signal=16%	FOS/CXCL2/IER3/CXCL8/DUSP6/HBEGF/HES1/AGRN/NAV3/L1CAM/ARAP2/CXCL1/SOX9/FLNB/JAG2/CKMT1B/EDN1/SFN/IL1B/PCDH7/DUSP10/TINAGL1/SPAG1/IRF6/CADM1/PTPRE/PLK2/SDC4/TNFRSF25/PLA2G4A/TMEM51/SEMA3F/FZD5/TMEM132A/ADAM8/RIMS2/PTPN3/TP63/EPCAM/CORO1A/PRKCH/CYP1A1/TSPAN13/LTB/ARHGAP25/SPRR1B/CYP4F11/CCNG2/RASSF9/RIPK4/JUP/KANK1/ZC3H12A/SLC6A8/ATP2B4/SMPDL3B/MAP7/GCH1/CDCP1/FLRT3/MYO1B/PARP12/EFNA1/FAM169A/KCNG1…
WP_CARDIAC_PROGENITOR_DIFFERENTIATION	WP_CARDIAC_PROGENITOR_DIFFERENTIATION	48	0.437133	1.48403	0.0403877	tags=38%, list=24%, signal=29%	SCN5A/ISL1/BMP1/LIN28A/TBX20/MESP2/GSK3B/MIXL1/DKK1/PAX6/BMP4/ACTC1/MAPK14/NCAM1/FOXA2/POU5F1/IRX4/PDGFRA
WP_KYNURENINE_PATHWAY_AND_LINKS_TO_CELLULAR_SENESCENCE	WP_KYNURENINE_PATHWAY_AND_LINKS_TO_CELLULAR_SENESCENCE	18	0.550265	1.48399	0.0448276	tags=22%, list=12%, signal=20%	TNF/HAAO/TDO2/IL1R2
BIDUS_METASTASIS_UP	BIDUS_METASTASIS_UP	211	0.349951	1.4836	0.00213623	tags=36%, list=22%, signal=28%	YWHAE/MNS1/CCDC47/CBLL1/RABGGTB/BCL7A/UBXN2B/SMC1A/TLK2/TPX2/CRY1/CBFB/IFT81/CCNY/FEN1/KIF11/AMD1/NUP153/ZNF318/HSP90AA1/SMS/ARPP19/CREB5/WAC/KIF1B/HNRNPD/SRSF12/NEMP1/FNDC5/CCDC57/EIF1/SQLE/SRSF1/SLC66A1L/BPTF/AGAP1/PPP2CA/HSF2/HUWE1/PATL1/DKC1/HNRNPR/NF1/WDHD1/NCBP2/RLIM/HMGXB4/YTHDF1/KLC1/RMND5A/DDX21/LMNB1/MXD1/CRKL/CCNA2/ZIC2/EIF4A3/SUMO4/ASF1B/SRD5A1/PREPL/NUSAP1/CDC23/AURKA/PLD6/MCM10/SGMS…
REACTOME_CELL_DEATH_SIGNALLING_VIA_NRAGE_NRIF_AND_NADE	REACTOME_CELL_DEATH_SIGNALLING_VIA_NRAGE_NRIF_AND_NADE	73	0.409326	1.48323	0.0171977	tags=29%, list=16%, signal=24%	AKAP13/YWHAE/ARHGEF1/ARHGEF11/TRIO/ARHGEF6/MAGED1/VAV3/SOS1/VAV2/ITSN1/NET1/ARHGEF2/ARHGEF39/OBSCN/NGF/PSEN2/MCF2L/ARHGEF33/MCF2/ARHGEF5
REACTOME_SIGNALING_BY_NOTCH1	REACTOME_SIGNALING_BY_NOTCH1	73	0.40908	1.48233	0.0171977	tags=27%, list=16%, signal=23%	HES1/HDAC7/MIB2/NCOR2/JAG2/TBL1XR1/MYC/EP300/ARRB2/NUMB/DTX2/ARRB1/PSEN2/HDAC8/DTX4/NCOR1/TLE3/CUL1/TLE1/DTX1
KOKKINAKIS_METHIONINE_DEPRIVATION_96HR_UP	KOKKINAKIS_METHIONINE_DEPRIVATION_96HR_UP	106	0.383015	1.48185	0.0225103	tags=10%, list=3%, signal=10%	JUN/CXCL8/IL6/GSTM1/BAX/APAF1/SMAD7/SKIL/IGFBP4/BTG2/IRF6
GAJATE_RESPONSE_TO_TRABECTEDIN_UP	GAJATE_RESPONSE_TO_TRABECTEDIN_UP	62	0.423492	1.48178	0.0168002	tags=18%, list=10%, signal=16%	FOS/ATF3/IL6/DUSP5/TAF15/TUBA1A/TLE5/GADD45A/CCNG2/HLA-C/FGG
REACTOME_PLATELET_AGGREGATION_PLUG_FORMATION	REACTOME_PLATELET_AGGREGATION_PLUG_FORMATION	36	0.459842	1.48157	0.0474576	tags=33%, list=15%, signal=28%	SOS1/SRC/ADRA2C/GRB2/FGG/APBB1IP/AKT1/F2/FGA/FN1/BCAR1/COL1A2
BIOCARTA_AKT_PATHWAY	BIOCARTA_AKT_PATHWAY	19	0.540293	1.48142	0.0459966	tags=53%, list=25%, signal=40%	NFKBIA/PIK3R1/HSP90AA1/PPP2CA/AKT1/GHR/CASP9/GH1/PIK3CA/IKBKB
REACTOME_INTRA_GOLGI_AND_RETROGRADE_GOLGI_TO_ER_TRAFFIC	REACTOME_INTRA_GOLGI_AND_RETROGRADE_GOLGI_TO_ER_TRAFFIC	191	0.353591	1.48068	0.00733653	tags=26%, list=17%, signal=22%	BICD1/CAPZB/STX5/KLC2/GBF1/ARFGAP1/ARF4/TUBA3E/TUBA1A/ARF5/DYNC1H1/CYTH3/BET1L/VPS53/KIFC1/KIF11/PLA2G4A/ARF3/GOLIM4/ARFGAP3/DCTN1/MAN1C1/KIF23/KIF1B/CYTH1/TMED9/SURF4/RAB30/GALNT2/KIF26B/KIF13B/RAB1B/GOLGA4/TUBA3D/TUBB4B/TUBB4A/KIF21A/RGP1/RAB9A/COG7/KLC1/DYNC1LI1/COPZ1/KIF4B/NAPB/NAPA/KIFC2/PAFAH1B2/TUBA3C/KIF25
PID_FOXM1_PATHWAY	PID_FOXM1_PATHWAY	40	0.450123	1.48064	0.0390155	tags=12%, list=5%, signal=12%	FOS/FOXM1/NFATC3/MYC/EP300
REACTOME_TOLL_LIKE_RECEPTOR_CASCADES	REACTOME_TOLL_LIKE_RECEPTOR_CASCADES	141	0.365505	1.48031	0.00970664	tags=32%, list=24%, signal=25%	FOS/JUN/DUSP6/NFKBIA/NFKB2/MAP2K7/PPP2R5D/CNPY3/MAPK7/DNM2/MEF2A/CTSK/TAB1/TRAF3/APP/FGG/PPP2CA/NFKBIB/BPI/UNC93B1/PPP2R1A/RPS6KA2/DUSP7/FGA/TLR7/BIRC3/MAP2K3/RPS6KA3/CUL1/IRAK1/MAPK14/ATF1/RPS27A/FBXW11/S100A8/HMGB1/APOB/PELI1/MAPKAPK2/MAPK1/DNM3/SFTPD/DUSP3/BTRC/IRF3
MODY_HIPPOCAMPUS_POSTNATAL	MODY_HIPPOCAMPUS_POSTNATAL	56	0.426951	1.47858	0.0240872	tags=34%, list=21%, signal=27%	EGR1/ATP2A2/GRINA/PKM/PTK2B/ENO2/KCNAB1/APBB1/TPI1/ATP6V1B2/PFKL/PYGM/RYR2/TYRO3/NAPA/STXBP1/SYT1/AIP/BIN1
WP_ATM_SIGNALING_PATHWAY	WP_ATM_SIGNALING_PATHWAY	36	0.458873	1.47845	0.0474576	tags=19%, list=9%, signal=18%	JUN/NFKBIA/ATM/SMC1A/PIDD1/GADD45A/H2AX
SESTO_RESPONSE_TO_UV_C5	SESTO_RESPONSE_TO_UV_C5	46	0.441934	1.47836	0.0214611	tags=35%, list=19%, signal=28%	HES1/NCOR2/SHB/CBFB/SDC4/MYC/SREBF1/CLIP1/RASA1/GSK3B/LDLR/MCL1/RBBP8/JAG1/ITGB4/PBX3
REACTOME_SIGNALING_BY_NOTCH2	REACTOME_SIGNALING_BY_NOTCH2	33	0.466102	1.4782	0.0458404	tags=15%, list=5%, signal=14%	HES1/MIB2/JAG2/MDK/EP300
WHITFIELD_CELL_CYCLE_M_G1	WHITFIELD_CELL_CYCLE_M_G1	117	0.376079	1.47817	0.00938884	tags=28%, list=16%, signal=24%	GDF15/NUFIP2/AKAP13/PPP6R3/PTMS/DCP1A/FOXK2/CYTH3/PLK2/DNAJB6/MSL1/WIPF2/FAM189B/AMD1/ZCCHC10/TULP4/AGFG1/TROAP/MRPS2/PPP2CA/DKC1/PPP2R2A/GRPEL1/C4A/MRPS18B/PRC1/CRYBA1/LARP1/LYAR/TLE3/RPL13A/ODF2/RHEB
GROSS_HYPOXIA_VIA_ELK3_ONLY_UP	GROSS_HYPOXIA_VIA_ELK3_ONLY_UP	32	0.469632	1.4773	0.0426621	tags=19%, list=8%, signal=17%	IL6/ADM/PPP1R15A/NFIL3/DHRS9/GADD45A
WIERENGA_STAT5A_TARGETS_GROUP1	WIERENGA_STAT5A_TARGETS_GROUP1	117	0.375746	1.47686	0.00950128	tags=32%, list=19%, signal=26%	ADM/DUSP5/CTSZ/PHLDA1/MIIP/ST3GAL4/SOS1/CERCAM/IGFBP4/MOSPD3/LTB/POU2F1/DDIT4/VASN/TGM2/CFH/FNDC3B/PLXNA3/ST3GAL5/GYPB/MEX3D/HSPA2/TMEFF2/PIM1/TULP3/RABGAP1/TLE3/SEMA6C/CTNS/FAM126B/RHEBL1/MYO10/SNTA1/TNFRSF4/DAPK1/PLEKHA4/TRIM46
WP_PATHWAYS_IN_CLEAR_CELL_RENAL_CELL_CARCINOMA	WP_PATHWAYS_IN_CLEAR_CELL_RENAL_CELL_CARCINOMA	84	0.395658	1.47656	0.0120013	tags=33%, list=19%, signal=27%	KCNJ2/TSC1/PKM/TOX2/PGBD5/ENO2/AKT1S1/EP300/KDM5C/PGK2/TPI1/TSC2/ACACB/AKT1/PFKL/FASN/PDGFB/HK2/HK1/ARNT/VHL/CAMK1/RHEB/LDHA/GAPDH/PBRM1/ZEB1/GPI
SATO_SILENCED_BY_DEACETYLATION_IN_PANCREATIC_CANCER	SATO_SILENCED_BY_DEACETYLATION_IN_PANCREATIC_CANCER	39	0.453066	1.47475	0.0455312	tags=13%, list=1%, signal=13%	CXCL8/ATF3/GDF15/ADM/UCP2
ZHOU_TNF_SIGNALING_4HR	ZHOU_TNF_SIGNALING_4HR	50	0.433353	1.47419	0.0426929	tags=20%, list=12%, signal=18%	CCN1/NFKBIA/CXCL1/DROSHA/PPP1R10/GADD45A/IL32/CDC34/PTGES/NCL
DUTERTRE_ESTRADIOL_RESPONSE_6HR_UP	DUTERTRE_ESTRADIOL_RESPONSE_6HR_UP	214	0.346146	1.47383	0.00297837	tags=27%, list=15%, signal=23%	PPIF/PHLDA1/CTPS1/FAM102A/SLC29A1/FLNB/TMEM104/SVIL/MCM4/DDX10/NAB2/IL17RB/IGFBP4/SLC25A24/HELLS/UHRF1/FEN1/MYC/SMOX/TIPARP/AMD1/BCL2/GAB2/LONRF2/WDR76/MCM5/MCM2/LRP8/RAPGEFL1/TMEM164/NOP2/NEMP1/SCARB1/MMS22L/TGM2/IFNAR2/LRRFIP2/SEH1L/DSCC1/SLC22A5/NOP56/ADCY9/KIF21A/TMED8/OLFML3/DKC1/PXK/PTGES/WDHD1/COL12A1/MYBBP1A/DDX21/ELF1/RBBP8/LYAR/CD44/SLC7A1/CALCR
APPIERTO_RESPONSE_TO_FENRETINIDE_UP	APPIERTO_RESPONSE_TO_FENRETINIDE_UP	37	0.458608	1.47332	0.042735	tags=27%, list=16%, signal=23%	GDF15/CCN1/ABHD4/SDC4/TSC2/AHSA1/KIF21A/MYADM/CCNJL/TM4SF1
REACTOME_ER_TO_GOLGI_ANTEROGRADE_TRANSPORT	REACTOME_ER_TO_GOLGI_ANTEROGRADE_TRANSPORT	149	0.360862	1.47328	0.00907087	tags=26%, list=17%, signal=22%	CTSZ/PPP6R3/CAPZB/SPTBN4/STX5/GBF1/SEC24C/ARFGAP1/ARF4/TUBA3E/TUBA1A/TRAPPC10/ARF5/DYNC1H1/BET1L/STX17/ARF3/ARFGAP3/DCTN1/SEC31A/TMED9/SEC24D/RAB1B/SPTAN1/TRAPPC9/TUBA3D/TUBB4B/TUBB4A/CSNK1D/COG7/DYNC1LI1/SEC22C/COPZ1/SEC13/MIA3/GOLGA2/NAPB/NAPA/TUBA3C
STEIN_ESRRA_TARGETS_RESPONSIVE_TO_ESTROGEN_UP	STEIN_ESRRA_TARGETS_RESPONSIVE_TO_ESTROGEN_UP	28	0.488331	1.47213	0.031474	tags=25%, list=10%, signal=23%	IER3/MCM4/ZNF629/DNAJC11/SLC35F2/TNFRSF10B/STARD7
PID_FAK_PATHWAY	PID_FAK_PATHWAY	58	0.421729	1.47211	0.0433387	tags=16%, list=4%, signal=15%	JUN/GRB7/ARHGEF11/MMP14/ACTA1/SOS1/SRC/MAPK8IP3/PIK3R1
MARTIN_NFKB_TARGETS_UP	MARTIN_NFKB_TARGETS_UP	42	0.445732	1.47211	0.049356	tags=17%, list=5%, signal=16%	CXCL2/DUSP6/SLC29A1/GTF3C1/MYC/TTYH3/BCL2
PAL_PRMT5_TARGETS_DN	PAL_PRMT5_TARGETS_DN	28	0.48805	1.47129	0.0432526	tags=36%, list=18%, signal=29%	CCN1/KLF10/SERPINE1/PGK2/TUBA3D/TOB1/HLA-B/KRT17/PDIA6/CNR1
WP_NETRINUNC5B_SIGNALING_PATHWAY	WP_NETRINUNC5B_SIGNALING_PATHWAY	51	0.431648	1.47109	0.0494234	tags=29%, list=19%, signal=24%	TNF/JUN/MAP2K2/SRC/PTK2B/PPP1CA/RLF/NTN1/NTN3/AKT1/PTPA/CIP2A/MAPK14/ITGB4/DAPK1
WP_MICRORNAS_IN_CARDIOMYOCYTE_HYPERTROPHY	WP_MICRORNAS_IN_CARDIOMYOCYTE_HYPERTROPHY	90	0.388742	1.47107	0.0195496	tags=26%, list=15%, signal=22%	TNF/HDAC7/MAP2K2/EDN1/MAP2K7/PIK3R1/MAPK7/MAP2K5/LRP5/DVL1/TAB1/NPPB/PIK3CD/CALM1/IGF1R/PLA2G2A/CTF1/MIR27B/AKT1/PIK3R3/GSK3B/MAP2K3/PRKCB
REACTOME_EPIGENETIC_REGULATION_OF_GENE_EXPRESSION	REACTOME_EPIGENETIC_REGULATION_OF_GENE_EXPRESSION	131	0.369176	1.471	0.00850536	tags=27%, list=16%, signal=23%	SIN3B/GATAD2B/PHF1/GATAD2A/MTA1/EHMT2/ERCC6/H2BC11/UHRF1/SAP30L/EP300/POLR1H/EED/H2BC14/DNMT3A/SAP30BP/SAP18/MBD3/TAF1A/H2AX/H2BC3/BAZ1B/TDG/MTA2/POLR1C/DNMT3B/MYBBP1A/GSK3B/H2BC17/DDX21/H3C1/GTF2H4/MBD2/ARID4B/MTF2/H4C1
WP_ERBB_SIGNALING_PATHWAY	WP_ERBB_SIGNALING_PATHWAY	87	0.392959	1.46989	0.0133326	tags=25%, list=15%, signal=22%	JUN/HBEGF/MAP2K2/SOS1/SRC/MAP2K7/CBL/PIK3R1/MYC/PAK4/STAT5B/CAMK2G/GAB1/PIK3CD/GRB2/STAT5A/AKT1/PIK3R3/GSK3B/PAK5/CRKL/PRKCB
SIG_INSULIN_RECEPTOR_PATHWAY_IN_CARDIAC_MYOCYTES	SIG_INSULIN_RECEPTOR_PATHWAY_IN_CARDIAC_MYOCYTES	51	0.43108	1.46916	0.0494234	tags=43%, list=24%, signal=33%	YWHAE/SOS1/SFN/CBL/CYTH3/PIK3R1/IRS1/PIK3CD/GRB2/AKT1/GSK3B/RPS6KA2/RPS6KA3/INPPL1/YWHAZ/SORBS1/PARD6A/AKT3/MAPK1/SHC1/AKT2/PIK3CA
ZHANG_TARGETS_OF_EWSR1_FLI1_FUSION	ZHANG_TARGETS_OF_EWSR1_FLI1_FUSION	85	0.39269	1.46757	0.00915868	tags=29%, list=19%, signal=24%	FOS/HES1/ARHGEF1/CSNK1E/KDSR/IGFBP4/CSRP1/CSPG5/MYC/ATP1A1/AK4/HIPK1/WDR47/GYG2/PRKCB/CAV1/UBXN7/SORD/IPO13/NELL2/MYO10/CRIP2/GABARAPL1/EGR2/DAPK1
GAUSSMANN_MLL_AF4_FUSION_TARGETS_G_DN	GAUSSMANN_MLL_AF4_FUSION_TARGETS_G_DN	34	0.45959	1.46712	0.0494881	tags=29%, list=13%, signal=26%	ETV1/WDR62/GPR19/CPEB1/FAM171B/SLC6A8/GCH1/WNT4/MTM1/RPS6KA2
PID_P38_ALPHA_BETA_DOWNSTREAM_PATHWAY	PID_P38_ALPHA_BETA_DOWNSTREAM_PATHWAY	37	0.456504	1.46656	0.0478632	tags=41%, list=21%, signal=32%	JUN/DDIT3/ELK4/PLA2G4A/MEF2A/GDI1/CSNK2A1/MAPK14/EIF4EBP1/ATF1/SLC9A1/KRT8/CSNK2A2/CSNK2B/MAPKAPK2
REACTOME_NR1H2_AND_NR1H3_MEDIATED_SIGNALING	REACTOME_NR1H2_AND_NR1H3_MEDIATED_SIGNALING	45	0.437034	1.4665	0.0428336	tags=51%, list=25%, signal=38%	NCOR2/KDM4A/NCOA1/TBL1XR1/PLTP/EP300/GPS2/SREBF1/RXRA/TNRC6C/FABP6/FASN/CETP/NCOR1/AGO4/TNRC6A/KDM3A/APOE/TNRC6B/MYLIP/MOV10/SCD/PLIN1
GOTZMANN_EPITHELIAL_TO_MESENCHYMAL_TRANSITION_UP	GOTZMANN_EPITHELIAL_TO_MESENCHYMAL_TRANSITION_UP	68	0.410722	1.46564	0.0237182	tags=15%, list=5%, signal=14%	JUN/FURIN/SERPINE1/EDN1/COL3A1/CSF1/LY6H/KIFC1/PLA2G4A/TNC
WP_CIRCADIAN_RHYTHM_RELATED_GENES	WP_CIRCADIAN_RHYTHM_RELATED_GENES	195	0.347989	1.46433	0.00415917	tags=25%, list=17%, signal=21%	EGR1/JUN/BHLHE40/IL6/KLF10/GFPT1/CSNK1E/ADORA2A/SERPINE1/SIK1/MAGED1/MTA1/CRTC1/ATOH7/CIPC/CRY1/UBE3A/NFIL3/PPP1CA/RAI1/EP300/PPARA/SREBF1/HNRNPD/OPRL1/F7/FAS/ADORA1/PROK2/CSNK1D/CST3/MYBBP1A/GSK3B/NTRK1/KMT2A/NCOR1/ARNT/ADCY1/AHCY/CHRNB2/CHRM1/CUL1/HTR7/DYRK1A/DBP/HCRTR2/PML/NTRK3
REACTOME_PHOSPHOLIPID_METABOLISM	REACTOME_PHOSPHOLIPID_METABOLISM	195	0.347973	1.46426	0.00415917	tags=25%, list=14%, signal=22%	GDPD3/PNPLA2/MTMR3/AGPAT1/MIGA2/CHKA/PIP5K1A/PIK3C2A/PIK3R6/CPNE1/CDS2/PLA1A/ABHD4/VAC14/PLB1/PIK3R1/CPNE7/PLA2G4A/ARF3/MTMR2/PIP5K1C/INPP5K/TAZ/CDIPT/HADHB/PIP4K2A/LPIN3/PIP5K1B/MBOAT7/TNFAIP8/PIP4K2B/RUFY1/PIK3CD/STARD7/PLA2G2A/PLA2G15/ETNK2/TPTE2/MTM1/LPCAT4/GPAT4/LPIN2/PIK3R3/CSNK2A1/OSBPL10/PTDSS2/SELENOI/PLD3/GDPD5
KOKKINAKIS_METHIONINE_DEPRIVATION_96HR_DN	KOKKINAKIS_METHIONINE_DEPRIVATION_96HR_DN	72	0.40432	1.46418	0.020401	tags=17%, list=9%, signal=15%	DDIT3/NFKBIA/ATM/SOS1/IL1B/FEN1/MYC/MTAP/HSP90AA1/TRADD/AK4/CALM1
PID_IL2_PI3K_PATHWAY	PID_IL2_PI3K_PATHWAY	33	0.461581	1.46386	0.049236	tags=33%, list=12%, signal=29%	SOS1/LCK/PIK3R1/MYC/HSP90AA1/BCL2/GAB2/TERT/BCL2L1/GRB2/AKT1
REACTOME_PTEN_REGULATION	REACTOME_PTEN_REGULATION	133	0.36659	1.46381	0.0116235	tags=32%, list=22%, signal=25%	EGR1/JUN/GATAD2B/HDAC7/GATAD2A/MTA1/ATN1/REST/CBX4/USP7/MAF1/SCMH1/PHC3/STUB1/EED/MBD3/CBX8/MTA2/TNRC6C/AKT1/PSMA8/CSNK2A1/PREX2/PSMD6/PSMD3/PHC1/AGO4/RHEB/PSMB8/RNF146/TNRC6A/PML/LAMTOR4/TRIM27/PSMD7/RPS27A/CSNK2A2/PSMD1/CSNK2B/AKT3/MAPK1/PHC2
ZHAN_EARLY_DIFFERENTIATION_GENES_DN	ZHAN_EARLY_DIFFERENTIATION_GENES_DN	39	0.449426	1.4629	0.0489039	tags=26%, list=8%, signal=24%	TNF/FOXM1/TERF2/MYC/RHOG/LIG1/EED/LTB/TRAF5/CCNG2
REACTOME_TP53_REGULATES_TRANSCRIPTION_OF_CELL_CYCLE_GENES	REACTOME_TP53_REGULATES_TRANSCRIPTION_OF_CELL_CYCLE_GENES	48	0.430824	1.46261	0.0420032	tags=31%, list=15%, signal=27%	TNKS1BP1/BAX/ARID3A/SFN/ZNF385A/BTG2/PLK2/CNOT8/EP300/GADD45A/PRMT1/CNOT3/NPM1/CNOT4/CCNA2
KEGG_CHEMOKINE_SIGNALING_PATHWAY	KEGG_CHEMOKINE_SIGNALING_PATHWAY	176	0.35202	1.46179	0.00750752	tags=37%, list=28%, signal=27%	CXCL2/CXCL8/NFKBIA/CXCL1/GNAI2/VAV3/SOS1/VAV2/PTK2B/PF4V1/PIK3R1/ARRB2/CCL4/ADCY6/STAT5B/PRKX/PIK3CD/GRB2/NFKBIB/ADCY9/GNG8/CCL5/GNG2/AKT1/ARRB1/PIK3R3/GSK3B/GRK4/PRKACG/GRK7/CRKL/PRKCB/BCAR1/ADCY1/CCR2/GRK6/ADCY8/CCL11/AKT3/PREX1/CXCL11/MAPK1/CCL7/SHC1/CCL3L1/PRKCD/CCL24/FGR/CX3CR1/TIAM2/AKT2/PIK3CA/IKBKB/CCL25/ELMO1/GRK3/CXCL5/RASGRP2/CCR7/STAT3/RAF1/SOS2/CCL16/CSK/NCF1
POS_HISTAMINE_RESPONSE_NETWORK	POS_HISTAMINE_RESPONSE_NETWORK	30	0.474529	1.4614	0.0497427	tags=20%, list=8%, signal=18%	JUN/FBLN5/ARF4/NDST1/ADH7/LMO1
NAKAYAMA_FRA2_TARGETS	NAKAYAMA_FRA2_TARGETS	44	0.439389	1.46122	0.0465117	tags=25%, list=12%, signal=22%	MT2A/DNAJB1/SLC30A1/MT1H/DUSP10/CTTN/BCL6/PAN3/AKIRIN2/MT1F/GPR18
VERRECCHIA_DELAYED_RESPONSE_TO_TGFB1	VERRECCHIA_DELAYED_RESPONSE_TO_TGFB1	36	0.453514	1.46118	0.0491525	tags=31%, list=13%, signal=27%	EPHA2/MTA1/IGFBP4/NME4/SEMA3F/MMP17/TNC/EPHB2/DVL3/TNFRSF1A/LAMB1
WANG_CLIM2_TARGETS_UP	WANG_CLIM2_TARGETS_UP	226	0.340227	1.45984	0.0045008	tags=26%, list=17%, signal=22%	DUSP6/BICD1/ASTN2/ARID2/SVIL/NFATC3/SCAF4/BANP/MAGI1/FOXP1-IT1/ZBTB7A/PSMC3IP/ZMYM3/KANSL1/ARRB2/REPS2/GLUL/CIC/UQCC1/IQCK/TP63/KIAA2013/C1QL1/TAPBP/ARHGEF39/EED/ETV3/CCNG2/PPP1R26/DDIT4/XPO1/DDX11/CDC42SE1/BCL2L1/USP6/SLC5A3/BVES/RALGAPA2/ARMC6/ETNK2/MTHFD2L/ACACB/BRF1/FBXW2/COL12A1/PTPRF/MCL1/CEP170B/CD109/SEMA6B/IGFBP2/MERTK/SEZ6L2/ADCY1/CD276/ARIH2/BMS1P1/DBP/BTF3
REACTOME_SIGNALING_BY_INTERLEUKINS	REACTOME_SIGNALING_BY_INTERLEUKINS	436	0.322001	1.45984	0.000335659	tags=22%, list=17%, signal=19%	FOS/CXCL2/TNF/JUN/CXCL8/JUNB/DUSP6/IL6/NFKBIA/PTPN23/CXCL1/NFKB2/CLCF1/SOS1/MAP3K3/SOCS3/IL1B/MAP2K7/CBL/PTK2B/IL17RB/LCK/PPP2R5D/SOCS5/CSF1/MSN/PIK3R1/MAPK7/MYC/MTAP/IRS1/TOLLIP/BCL6/SMAD3/HSP90AA1/BCL2/MEF2A/IL20RB/CCL4/GAB2/RHOU/STAT5B/TAB1/PTPN18/POU2F1/CNTFR/IL9/S1PR1/IL32/BCL2L1/PIK3CD/GRB2/IL3/STXBP2/APP/PPP2CA/NFKBIB/STAT5A/IL9R/CCL5/CTF1/AKT1/PPP2R1A/PSMA8/ALOX15/IL1R2/TNFRSF1A/PIK3R3/RP…
WP_NOTCH_SIGNALING	WP_NOTCH_SIGNALING	42	0.442007	1.4598	0.0420875	tags=31%, list=18%, signal=25%	HES1/NCOR2/JAG2/DVL1/DLL3/INPP5K/NUMB/DVL3/DTX2/PSEN2/DTX4/DTX1/JAG1
HIRSCH_CELLULAR_TRANSFORMATION_SIGNATURE_UP	HIRSCH_CELLULAR_TRANSFORMATION_SIGNATURE_UP	226	0.340199	1.45972	0.00455224	tags=18%, list=11%, signal=16%	DUSP1/JUNB/IL6/SLCO4A1/IER2/PHLDA1/EPHA2/RNF19B/PPM1D/SOCS3/IL1B/FOSL1/TGIF1/WARS1/ARHGEF2/GATAD1/LHFPL2/ADGRG6/PNRC1/SBNO2/CYTH1/TNFAIP8/EIF1/EVI2B/AGFG1/ROBO3/RPL36/GALNT2/DENND1A/S1PR1/BCL2L1/IRF2/BCL3/FHL2/RNF41/GCH1/CDCP1/CFH/KLF2/GAS1
REACTOME_RUNX1_REGULATES_GENES_INVOLVED_IN_MEGAKARYOCYTE_DIFFERENTIATION_AND_PLATELET_FUNCTION	REACTOME_RUNX1_REGULATES_GENES_INVOLVED_IN_MEGAKARYOCYTE_DIFFERENTIATION_AND_PLATELET_FUNCTION	87	0.390199	1.45956	0.0147484	tags=28%, list=18%, signal=23%	SIN3B/KMT2B/MYL9/WDR5/KMT2C/H2BC11/CBFB/KMT2E/EP300/SETD1A/KMT2D/H2BC14/H2AX/PRMT1/H2BC3/TNRC6C/SETD1B/H2BC17/H3C1/KMT2A/AGO4/H4C1/TNRC6A/H2BC13
SCHAEFFER_PROSTATE_DEVELOPMENT_6HR_DN	SCHAEFFER_PROSTATE_DEVELOPMENT_6HR_DN	448	0.321709	1.45941	0.000325823	tags=21%, list=15%, signal=18%	SIN3B/VANGL2/NUFIP2/SNRNP70/TBC1D17/TNKS1BP1/NFIX/YWHAE/CLDND1/PTMS/FURIN/ARHGDIA/SOX9/SENP2/MAGED1/GNAI2/MPRIP/GBF1/PKM/BCL7A/PHETA1/ATP1B1/AAMP/DENND2B/KMT2C/REST/ID1/CBX4/CSRP1/CLPTM1/ZNF664/UHRF1/CSPG5/PPP1CA/CAMK1D/KANSL1/LY6H/PHF13/ARHGEF2/SMG6/ARF3/IER5L/GOLIM4/WNK1/TMEM132A/SIPA1L2/EPCAM/WAC/PFN1/GPC1/ADAMDEC1/RNF111/DNMT3A/DGCR2/ADIPOR1/SHKBP1/BCL2L1/SET/PRKCSH/GIPC1/DIS3/GRIA4/GOLGA4/SE…
HUANG_GATA2_TARGETS_DN	HUANG_GATA2_TARGETS_DN	72	0.40288	1.45896	0.0218326	tags=28%, list=19%, signal=23%	EGR1/PHLDA1/CTPS1/JMJD6/TMEM132A/ST3GAL6/SEMA4B/MRPL38/GPAT4/PLAGL2/IPPK/PDGFB/HK2/DCTD/TXNDC5/TRMT61A/TMEM109/CHAC1/AURKA/PODXL
BROWNE_HCMV_INFECTION_4HR_DN	BROWNE_HCMV_INFECTION_4HR_DN	234	0.340764	1.45875	0.00298673	tags=24%, list=15%, signal=20%	DUSP1/JUN/ADM/DDIT3/CCN1/ZFP36/ETV1/KLF10/SMAD7/MPRIP/TWF2/SIPA1/ERCC6/FBXO46/NLRP1/MATK/SOCS5/PLEC/KLF6/LTBR/SUPT20H/SPOP/ZNF629/SMAD3/LYST/MOCS3/SPECC1L/LRP8/DYRK2/PRDM2/GADD45A/RIN1/ZNF205/ABCC10/MICU1/NGF/AP1G2/ZNF268/RAD17/PPP2CA/RXRA/GNRH1/RUNX1T1/ABCA4/SERPINI2/DDX17/GABBR2/TRIB2/THOC1/PIM1/RBM10/GEMIN2/DXO/PRKCB/SLC7A1
LEE_AGING_MUSCLE_UP	LEE_AGING_MUSCLE_UP	37	0.453082	1.45556	0.0478632	tags=19%, list=10%, signal=17%	FOS/ATF3/ARF5/TGIF1/DCTN1/GADD45A/STARD7
THEILGAARD_NEUTROPHIL_AT_SKIN_WOUND_DN	THEILGAARD_NEUTROPHIL_AT_SKIN_WOUND_DN	215	0.341322	1.45423	0.00473946	tags=26%, list=13%, signal=22%	APAF1/RGS19/MTMR3/ARHGEF1/CBFA2T3/CAPZB/TIAL1/GNAI2/GPR19/TWF2/MAP3K3/NCOA1/FKBP1A/HNRNPUL1/SMC1A/GAS7/GTF3C1/SLC23A2/STK38/PPP1CA/MYO9B/NUP153/RERE/CDIPT/SLC19A1/CYTH1/CORO1A/UBN1/PNN/LTB/CELF2/NPEPPS/UPF1/CAMK2G/CDKN2D/SRSF1/POLR2J/CALM1/SET/GNAO1/SEC14L1/TOB1/LST1/LSP1/ICAM3/PRMT2/AKT1/TSC22D3/RASA1/MAP3K5/GSK3B/SPAST/RALY/USP1/KLC1
PICCALUGA_ANGIOIMMUNOBLASTIC_LYMPHOMA_DN	PICCALUGA_ANGIOIMMUNOBLASTIC_LYMPHOMA_DN	129	0.367072	1.45373	0.00884219	tags=19%, list=9%, signal=17%	JUN/CSRNP1/FOSB/PPP1R15A/ZFP36/KLF10/PCIF1/PHF1/SIK1/SLC30A1/DUSP10/CBX4/TSPYL2/KLF6/DNAJB6/TIPARP/AMD1/CCNL1/EIF5/GADD45A/EIF1/RSRC2/CSGALNACT2/HIPK1
TOYOTA_TARGETS_OF_MIR34B_AND_MIR34C	TOYOTA_TARGETS_OF_MIR34B_AND_MIR34C	412	0.322297	1.45369	0.00141654	tags=32%, list=22%, signal=25%	ATP2A2/SAMD1/SNRNP70/JADE2/TAGLN2/SOGA1/SLC43A3/SF1/PASK/MNS1/ARHGDIA/LY6E/SLC29A1/GPR19/FOXM1/NFATC3/RAB3D/SCAF4/CALML4/CCDC9/SNHG17/MED22/HNRNPUL1/SNHG7/POP1/SREK1IP1/HELLS/PPIP5K1/GPSM2/PSMC3IP/TEF/CNPY3/POLE/TUBB/LUC7L/UBE2S/MSL1/SAP30L/FEN1/MLLT1/KIFC1/PKMYT1/KIF11/ZBTB8A/SYNE2/C6orf89/LHFPL2/GUSBP11/CCDC93/PDE7A/PTPN3/PA2G4/ZNF700/LIG1/ANKLE2/HNRNPD/PATJ/TTLL4/MMS22L/ALMS1/UPF2/FAR2/KIAA202…
REACTOME_NCAM_SIGNALING_FOR_NEURITE_OUT_GROWTH	REACTOME_NCAM_SIGNALING_FOR_NEURITE_OUT_GROWTH	61	0.415156	1.4524	0.0190343	tags=23%, list=13%, signal=20%	AGRN/SPTBN4/SOS1/COL3A1/SRC/COL6A2/GDNF/COL9A2/GFRA2/CACNA1I/GRB2/SPTAN1/COL6A1/ARTN
REACTOME_COPI_DEPENDENT_GOLGI_TO_ER_RETROGRADE_TRAFFIC	REACTOME_COPI_DEPENDENT_GOLGI_TO_ER_RETROGRADE_TRAFFIC	96	0.382095	1.45221	0.0150081	tags=31%, list=17%, signal=26%	KLC2/GBF1/ARFGAP1/ARF4/TUBA3E/TUBA1A/ARF5/KIFC1/KIF11/ARF3/ARFGAP3/KIF23/KIF1B/TMED9/SURF4/KIF26B/KIF13B/RAB1B/TUBA3D/TUBB4B/TUBB4A/KIF21A/KLC1/COPZ1/KIF4B/NAPB/NAPA/KIFC2/TUBA3C/KIF25
REACTOME_REGULATION_OF_TP53_ACTIVITY_THROUGH_ACETYLATION	REACTOME_REGULATION_OF_TP53_ACTIVITY_THROUGH_ACETYLATION	29	0.478396	1.45156	0.0456942	tags=52%, list=21%, signal=41%	GATAD2B/GATAD2A/EP300/PIP4K2A/PIP4K2B/MBD3/KAT6A/MTA2/AKT1/ING2/BRD7/PML/PIP4P1/BRD1/AKT3
DELACROIX_RARG_BOUND_MEF	DELACROIX_RARG_BOUND_MEF	347	0.325779	1.44905	0.00155974	tags=23%, list=19%, signal=19%	DUSP1/JUNB/BHLHE40/DUSP6/GDF15/DDIT3/IFFO2/TAGLN2/HMGA1/PKN1/AGPAT1/BSG/FURIN/CHKA/EFCAB2/SH3BP1/SCAF1/CLCF1/PKM/SRC/DEDD/DENND2B/SKIL/G6PD/SLC25A24/CTTN/PIDD1/RILP/MAP2K5/PCOLCE/AP2A2/DBNDD1/DUSP14/EPHB2/STUB1/FIGN/PDLIM7/TPM2/DMPK/RAB30/RUFY1/CDKN2D/OSR1/AHCTF1/WWTR1/CHMP1A/RHOF/LSP1/EFNA1/EVX2/CAPNS1/DOK4/RLIM/RHOBTB2/STK11/PLAGL2/USP44/LNX2/RNF5/GDPD5/FN1/ZNF438/METRN/MRGPRF/RPL13A/CTNS/INPPL…
PID_IL4_2PATHWAY	PID_IL4_2PATHWAY	61	0.414197	1.44905	0.0190343	tags=41%, list=24%, signal=31%	HMGA1/SOCS3/CBL/SOCS5/PIK3R1/IRS1/BCL6/STAT5B/BCL2L1/GRB2/STAT5A/AKT1/ALOX15/OPRM1/LTA/COL1A2/TFF3/MAPK14/EGR2/IL13RA1/CCL11/IL5/SHC1/PIK3CA/PTPN6
REACTOME_ACTIVATION_OF_ANTERIOR_HOX_GENES_IN_HINDBRAIN_DEVELOPMENT_DURING_EARLY_EMBRYOGENESIS	REACTOME_ACTIVATION_OF_ANTERIOR_HOX_GENES_IN_HINDBRAIN_DEVELOPMENT_DURING_EARLY_EMBRYOGENESIS	109	0.372552	1.44893	0.0227613	tags=33%, list=22%, signal=26%	JUN/WDR5/HOXA4/KMT2C/H2BC11/HOXC4/PAGR1/EP300/KMT2D/EED/H2BC14/POLR2J/H2AX/H2BC3/PAXIP1/RXRA/POLR2C/AJUBA/H2BC17/NCOA6/POLR2B/POLR2A/H3C1/NCOR1/HOXD3/PAX6/H4C1/H2BC13/RARB/EGR2/H4C6/MAFB/H2BC10/HOXD4/POLR2D/H2AB1
WP_ENDOMETRIAL_CANCER	WP_ENDOMETRIAL_CANCER	61	0.414097	1.4487	0.0192768	tags=44%, list=28%, signal=32%	FOS/BAX/MAP2K2/SOS1/PIK3R1/MYC/GADD45A/PIK3CD/GRB2/AKT1/PIK3R3/GSK3B/TCF7L1/BAK1/CASP9/LEF1/EGFR/AKT3/MAPK1/AKT2/PIK3CA/FGFR1/TCF7L2/PTEN/RAF1/SOS2/CTNNA2
TARTE_PLASMA_CELL_VS_PLASMABLAST_UP	TARTE_PLASMA_CELL_VS_PLASMABLAST_UP	367	0.323902	1.44858	0.000958475	tags=23%, list=19%, signal=19%	EGR1/FOS/DUSP1/CXCL8/HES1/FOSB/ADM/KISS1/NFKBIA/JADE2/DLG4/HSF4/NFKB2/RBPMS/TNP1/FLNB/IDUA/MDK/TDGF1P3/IGFBP4/TACR3/BTG2/CSF1/TGIF1/ENO2/PCOLCE/TNC/ATF6B/GUSBP11/CHERP/ADAM8/CCSER2/RBMS2/SGSH/GPC1/MAG/CD34/MPZ/CD22/NHLH1/JUP/KANK1/ITGA3/GAA/RPS16/SMPDL3B/SERPING1/ADH4/PTPRN/CDC34/LST1/HLA-B/C4A/GPR18/BTN2A2/GYPB/CST3/TSC22D3/RUNX1T1/ADCYAP1/OPRM1/STX1A/BIRC3/PRKACG/LRRC23/MERTK/PAX6/CDSN/IFNA21/M…
REACTOME_NEGATIVE_REGULATION_OF_THE_PI3K_AKT_NETWORK	REACTOME_NEGATIVE_REGULATION_OF_THE_PI3K_AKT_NETWORK	105	0.375584	1.44766	0.0108746	tags=23%, list=14%, signal=20%	IER3/HBEGF/PIP5K1A/SRC/LCK/PPP2R5D/PIK3R1/IRS1/PIP5K1C/RHOG/GAB2/PIP4K2A/PIP5K1B/PIP4K2B/GAB1/PIK3CD/GRB2/PPP2CA/FGF6/AKT1/PPP2R1A/FGF20/PIK3R3/PDGFB
HELLER_HDAC_TARGETS_SILENCED_BY_METHYLATION_UP	HELLER_HDAC_TARGETS_SILENCED_BY_METHYLATION_UP	435	0.31973	1.4473	0.000383005	tags=19%, list=12%, signal=17%	EGR1/FOS/DUSP1/IER3/HES1/AGRN/L1CAM/AKAP13/MT2A/CLIP2/FLNB/JAG2/MT1H/ZSWIM8/ATP1B1/MT1X/PFKFB3/MT1E/MAPRE3/NAB2/TUBA1A/G6PD/ID1/MAGEA4/COL6A2/GPSM2/PLEC/ITSN1/PLPPR2/PLK2/SDC4/CSPG5/UBE2S/RHCE/MYO9B/TRIP6/MARCKSL1/PGBD5/CDK18/AP5Z1/BCL6/BAIAP2/GLUL/FZD5/SYN1/PEG10/MFSD12/ZER1/CYP1A1/TSPAN13/ATP13A2/HLA-DRB1/KHK/ALDH4A1/JUP/TROAP/ZCCHC14/PIK3CD/CALM1/TAC1/SLC6A8/DHRS2/JPT1/ABTB2/KCTD12/H2BC3/WASF1…
MONNIER_POSTRADIATION_TUMOR_ESCAPE_UP	MONNIER_POSTRADIATION_TUMOR_ESCAPE_UP	389	0.322748	1.44685	0.00105236	tags=31%, list=23%, signal=24%	MAFG/LETM1/PPIF/ATP2A2/SLCO3A1/HMGA1/NAA16/OTUD4/GCLM/GATAD2A/BMS1/SENP2/FAM102A/SRM/ATP1B1/KHDC4/ALKBH1/SAMD4A/SLC48A1/FOSL1/RASSF1/GRWD1/G6PD/POP1/TSPAN14/TRAF2/BACE1/PC/WIPF2/PIK3R1/RBM25/IPO4/MARCKSL1/EIF4G1/CSNK1G1/CCDC93/NPLOC4/KCTD17/PA2G4/PPP1R10/SLC19A1/GPC1/ATP1A1/ITPRIP/PNN/RSRC2/RCC1/ADIPOR1/TBRG4/LUC7L3/SLC6A8/ILRUN/INTS6/HIPK1/PCBP2/DDX51/NIPBL/EIF4EBP2/NOP56/TADA2B/MLEC/C1orf109/KI…
PID_SHP2_PATHWAY	PID_SHP2_PATHWAY	55	0.419216	1.44683	0.0408497	tags=33%, list=17%, signal=27%	IL6/MAP2K2/SOS1/LCK/PIK3R1/IRS1/GAB2/LMO4/GAB1/GRB2/NGF/IGF1R/PAG1/NTRK1/PDGFB/IL6R/NTRK3/NTF4
WP_SYNAPTIC_SIGNALING_PATHWAYS_ASSOCIATED_WITH_AUTISM_SPECTRUM_DISORDER	WP_SYNAPTIC_SIGNALING_PATHWAYS_ASSOCIATED_WITH_AUTISM_SPECTRUM_DISORDER	50	0.425177	1.44638	0.0492611	tags=50%, list=26%, signal=37%	DLG4/TSC1/UBE3A/PIK3R1/CAMK4/GRIN2A/PIK3CD/PRKAG2/TSC2/GRIN2C/NF1/AKT1/PIK3R3/GSK3B/PRKAG1/RHEB/EIF4EBP1/AKT3/SHANK3/MAPK1/NTRK2/AKT2/PIK3CA/RPTOR/PTEN
REACTOME_RND3_GTPASE_CYCLE	REACTOME_RND3_GTPASE_CYCLE	42	0.437717	1.44563	0.0488215	tags=19%, list=7%, signal=18%	VANGL2/KCTD13/EPHA2/TMOD3/RASAL2/PIK3R1/CKAP4/PICALM
MCCLUNG_COCAINE_REWARD_5D	MCCLUNG_COCAINE_REWARD_5D	75	0.394549	1.44489	0.0239513	tags=28%, list=12%, signal=25%	CORO2B/DLG4/ADORA2A/MAPRE3/SPOCK2/BAIAP2/ZFP64/NECTIN2/KIF23/SDHC/POU2F1/CELF2/GADD45A/JUP/GRIA4/GOLGA4/SEC14L1/TUBB4A/ADORA1/UNC93B1/TSPAN7
DEBIASI_APOPTOSIS_BY_REOVIRUS_INFECTION_DN	DEBIASI_APOPTOSIS_BY_REOVIRUS_INFECTION_DN	258	0.334429	1.44459	0.00336454	tags=37%, list=24%, signal=29%	AGRN/ATP2A2/OGDH/SULT1A2/SLC29A1/MAGED1/GNAI2/NCDN/MARCHF2/DICER1/PCDH7/HYOU1/PLTP/PLEC/MEN1/ITSN1/SV2A/CSPG5/CLSTN1/MYC/MYO9B/LRP5/ENO2/EP300/FADS2/EPHB2/GPC1/KDM5C/LIG1/FANCA/TBC1D2B/KHK/ABCA2/SQLE/KANK1/ABCC10/SLC6A8/AP1G2/ATXN1/PIM2/SEC14L1/TUBB4A/ADCY9/MLEC/PTK7/POR/PRMT2/SLC5A6/RRBP1/UBAP2L/PSEN2/STK11/OBSL1/PTPRF/PDIA4/ATR/POLR2A/GAMT/MAP2K3/TBCD/P3H3/ITGA7/CTNS/PRAME/MKI67/IPO13/PPARD/TRI…
PID_NFAT_3PATHWAY	PID_NFAT_3PATHWAY	53	0.42082	1.44448	0.0464345	tags=36%, list=17%, signal=30%	YWHAE/NFATC3/SFN/FKBP1A/FKBP8/EP300/BCL2/PRKCH/CAMK4/XPO1/BCL2L1/AKAP5/PPP3R1/CSNK2A1/GSK3B/PIM1/PRKCB/YWHAZ/MAPK14
MARTORIATI_MDM4_TARGETS_NEUROEPITHELIUM_UP	MARTORIATI_MDM4_TARGETS_NEUROEPITHELIUM_UP	165	0.349544	1.44423	0.0106567	tags=24%, list=15%, signal=20%	BHLHE40/ADM/DUSP5/BAX/ARAP2/RBM38/MT1A/MT1X/RNF126/ID1/NME4/PIDD1/PLK2/LIN28A/TP53INP1/MYC/FOXL2/SESN2/AK4/ANO3/DDIT4/RPL36/PTP4A3/NKX6-2/ENG/TPI1/CDC34/PTK7/FAT1/PFKL/SLC39A7/TIMM17A/ZNF688/HK2/KLHL26/CEP170B/PRTG/MARCHF5/LYPD1
MUNSHI_MULTIPLE_MYELOMA_UP	MUNSHI_MULTIPLE_MYELOMA_UP	71	0.400803	1.44372	0.0181598	tags=13%, list=5%, signal=12%	FOS/JUN/NFKBIA/VAV2/USF2/FOXK2/CSF1/GSTM4/TMC6
FLECHNER_PBL_KIDNEY_TRANSPLANT_OK_VS_DONOR_UP	FLECHNER_PBL_KIDNEY_TRANSPLANT_OK_VS_DONOR_UP	147	0.355207	1.44347	0.00940187	tags=20%, list=11%, signal=18%	HBEGF/PPP1R15A/KLHL21/SF1/CAPZB/BMS1/PHF2/MAGED1/NCOR2/DEDD/NELFB/CPNE1/HYOU1/KLF6/WIPF2/STK38/PIK3R1/SETD1A/CDIPT/NUMB/PA2G4/TAPBP/CTSK/MBOAT7/TSFM/LMO1/PRMT1/HIPK1/ANP32B/LST1
REACTOME_SIGNALING_BY_NOTCH1_PEST_DOMAIN_MUTANTS_IN_CANCER	REACTOME_SIGNALING_BY_NOTCH1_PEST_DOMAIN_MUTANTS_IN_CANCER	57	0.415193	1.44322	0.0467742	tags=14%, list=5%, signal=13%	HES1/HDAC7/MIB2/NCOR2/JAG2/TBL1XR1/MYC/EP300
VERHAAK_AML_WITH_NPM1_MUTATED_UP	VERHAAK_AML_WITH_NPM1_MUTATED_UP	168	0.348704	1.4423	0.0126805	tags=11%, list=6%, signal=10%	CXCL2/TNF/IER3/GDF15/IL6/NFKBIA/KCNJ2/NFKB2/HOXA4/IL1B/EPB41L3/PLA2G4A/WARS1/HNMT/BCL6/PIEZO2/GGT1/CCL4
HERNANDEZ_MITOTIC_ARREST_BY_DOCETAXEL_2_UP	HERNANDEZ_MITOTIC_ARREST_BY_DOCETAXEL_2_UP	58	0.412977	1.44156	0.0481541	tags=24%, list=13%, signal=21%	HMGA1/PHLDA1/MT2A/MT1X/CSF1/MARCKSL1/ETV4/MBOAT7/GADD45A/IL32/MAP7/MCU/RGP1/ITM2A
SHAFFER_IRF4_TARGETS_IN_PLASMA_CELL_VS_MATURE_B_LYMPHOCYTE	SHAFFER_IRF4_TARGETS_IN_PLASMA_CELL_VS_MATURE_B_LYMPHOCYTE	61	0.412048	1.44153	0.0212166	tags=26%, list=16%, signal=22%	ATF3/DDIT3/ZFP36/DUSP5/GFPT1/NFIL3/SLC12A4/TERT/TM9SF4/PIM2/LDLR/PDIA4/TIMP2/PCYT1B/CAV1/TXNDC5
WP_ASSOCIATION_BETWEEN_PHYSICOCHEMICAL_FEATURES_AND_TOXICITY_ASSOCIATED_PATHWAYS	WP_ASSOCIATION_BETWEEN_PHYSICOCHEMICAL_FEATURES_AND_TOXICITY_ASSOCIATED_PATHWAYS	65	0.407857	1.44037	0.02933	tags=31%, list=17%, signal=26%	JUN/ACTA1/SOS1/SRC/CBL/MYC/DVL1/FZD5/PFN1/GRB2/PPP2CA/STAT5A/AKT1/GSK3B/FN1/SOD1/CAMK1/NEFH/MYL1/MYLK
ACOSTA_PROLIFERATION_INDEPENDENT_MYC_TARGETS_DN	ACOSTA_PROLIFERATION_INDEPENDENT_MYC_TARGETS_DN	110	0.370508	1.43953	0.0134029	tags=37%, list=23%, signal=29%	JUNB/CBFA2T3/SH3BP1/SLC48A1/ID1/KLF6/SNPH/MYC/RHCE/ADAMTSL4/ARHGEF2/ARFGAP3/ADAM8/RHOG/SERPINH1/RIT1/TNFAIP8/TWNK/SEC24D/BCL2L1/MINK1/SEC14L1/STAT5A/GYPB/EPOR/MCL1/PIM1/ARHGEF5/CD63/GABRE/CSH2/LASP1/KRT8/MCAM/BCAM/MIA2/HBB/TRPV2/SLC10A3/SHC1/AIF1
KEGG_COLORECTAL_CANCER	KEGG_COLORECTAL_CANCER	59	0.410481	1.43943	0.0446571	tags=36%, list=24%, signal=27%	FOS/JUN/BAX/PIK3R1/MYC/SMAD3/BCL2/PIK3CD/AKT1/PIK3R3/GSK3B/TCF7L1/RAC3/CASP9/LEF1/SMAD2/MSH2/AKT3/MAPK1/AKT2/PIK3CA
PEDRIOLI_MIR31_TARGETS_UP	PEDRIOLI_MIR31_TARGETS_UP	204	0.340217	1.43823	0.0080056	tags=24%, list=16%, signal=20%	PPIF/L1CAM/ASTN2/UCP2/STIP1/FBLN5/AADACL4/ST3GAL4/RNF112/SLC23A2/CADM1/RGS10/TAF5L/ADGRG6/FZD5/LRRC8E/CACNA1I/IKZF4/GLYATL2/PCDHGC4/CORO1A/NXPE2/PPME1/CNTFR/CLPSL2/OBSCN/RASSF9/DDIT4/PIP4K2B/HS6ST1/ATP2B4/PHF7/BOLL/RHOF/TDG/OLFML3/LINC00482/PIK3R3/ZCWPW2/PFDN6/KRT17/FASN/LMNB1/ARMC8/ANKRD2/PHACTR3/KLHL29/MGARP
ZAMORA_NOS2_TARGETS_DN	ZAMORA_NOS2_TARGETS_DN	79	0.390532	1.43821	0.0213554	tags=27%, list=14%, signal=23%	CTSZ/ATP6V0C/GCLM/MAP2K2/DYNC1H1/PPP1CA/MYH9/ATP5F1D/ATP1A1/JUP/SLC6A8/IFNAR2/SERPING1/SCN1B/APP/CFH/CAPNS1/PPP2R1A/DDB1/TSPAN4/PDIA4
REACTOME_TRANSPORT_TO_THE_GOLGI_AND_SUBSEQUENT_MODIFICATION	REACTOME_TRANSPORT_TO_THE_GOLGI_AND_SUBSEQUENT_MODIFICATION	177	0.346266	1.43723	0.0118618	tags=24%, list=17%, signal=20%	CTSZ/PPP6R3/CAPZB/SPTBN4/STX5/ST3GAL4/GBF1/B4GALT1/SEC24C/ARFGAP1/ARF4/TUBA3E/TUBA1A/TRAPPC10/ARF5/DYNC1H1/BET1L/STX17/ARF3/ARFGAP3/DCTN1/MAN1C1/SEC31A/TMED9/SEC24D/RAB1B/SPTAN1/TRAPPC9/TUBA3D/TUBB4B/TUBB4A/CSNK1D/B4GALT3/COG7/DYNC1LI1/SEC22C/COPZ1/SEC13/MIA3/GOLGA2/NAPB/NAPA/TUBA3C
MA_MYELOID_DIFFERENTIATION_DN	MA_MYELOID_DIFFERENTIATION_DN	43	0.431483	1.43683	0.0495868	tags=12%, list=2%, signal=11%	FOS/HBEGF/SH3BP1/NFATC3/VAV2
KOKKINAKIS_METHIONINE_DEPRIVATION_48HR_DN	KOKKINAKIS_METHIONINE_DEPRIVATION_48HR_DN	61	0.40978	1.4336	0.022429	tags=39%, list=28%, signal=28%	GSTM1/DDIT3/ATM/SOS1/IGFBP4/MYC/MTAP/DVL3/CALM1/IFRD2/IRAK1/MAPK14/LEF1/AURKB/TYMS/FGFR1/CEBPG/CTPS2/TK1/CDC25B/SOS2/AKAP9/BIRC5/RRM1
SUNG_METASTASIS_STROMA_UP	SUNG_METASTASIS_STROMA_UP	105	0.371897	1.43345	0.0134414	tags=16%, list=9%, signal=15%	JUNB/DUSP6/AGRN/FURIN/CLIP2/TRIO/SPSB1/COL3A1/SOCS5/PLK2/SDC4/TNC/CPEB2/LMO4/SEC24D/PSD3/GAA
WP_ENDOPLASMIC_RETICULUM_STRESS_RESPONSE_IN_CORONAVIRUS_INFECTION	WP_ENDOPLASMIC_RETICULUM_STRESS_RESPONSE_IN_CORONAVIRUS_INFECTION	45	0.427017	1.43289	0.0494234	tags=22%, list=13%, signal=19%	PPP1R15A/PPP1R3F/DDIT3/PPP1CA/BCL2/PPP1R1C/PPP1R10/PPP1R9A/MAP1LC3A/EIF2AK3
TONKS_TARGETS_OF_RUNX1_RUNX1T1_FUSION_MONOCYTE_UP	TONKS_TARGETS_OF_RUNX1_RUNX1T1_FUSION_MONOCYTE_UP	195	0.3404	1.4324	0.00686859	tags=26%, list=18%, signal=22%	DUSP6/GDF15/SLCO4A1/L1CAM/CTPS1/MT2A/GATAD2A/LY6E/FLNB/MT1H/C11orf95/C1QBP/MT1X/PLTP/CSF1/TRIP6/TNPO1/GPS2/DUSP14/PA2G4/MYRF/DHRS9/CYP1A1/PPME1/SIVA1/SPTAN1/WDR43/PUS1/SLC5A3/SEH1L/TNPO2/NOP56/LAPTM4B/DKC1/NPM1/RRP9/MYBBP1A/SLC39A7/ANKRD40/RMND5A/PTDSS2/IFRD2/COL1A2/NEFH/FARP1/TM4SF1/EIF3B/SORD/LGALS9/PXDN/EIF4EBP1
MOHANKUMAR_HOXA1_TARGETS_UP	MOHANKUMAR_HOXA1_TARGETS_UP	389	0.319494	1.43226	0.00137424	tags=27%, list=20%, signal=22%	IER3/BHLHE40/PRRC2A/SMG7/L1CAM/TMEM94/CHKA/HNRNPM/CCDC47/DNAJB1/VPS4A/PPM1D/ST3GAL4/CAPN15/PKM/HELZ/CS/RPRD2/G6PD/FBXO10/TAOK2/HELLS/CENPT/SYT12/CLPTM1/PLK2/MAZ/TUBB/MARCKSL1/AMD1/ARF3/DCTN1/HADHB/RBMS2/DUSP14/PIP4K2A/CRAMP1/LRP8/NOP2/EIF5/CORO1B/SEC63/UBE2K/CYP1A1/MBOAT7/PICALM/RCC1/SEC24D/XPO1/ADIPOR1/SRSF1/TBRG4/H2AX/ICMT/PRMT1/DHRS2/ABTB2/ILRUN/GRB2/RAB1B/HIPK1/KCNK2/ALG8/ADAR/TUBB4B/H1-0/GPA…
TURASHVILI_BREAST_DUCTAL_CARCINOMA_VS_DUCTAL_NORMAL_DN	TURASHVILI_BREAST_DUCTAL_CARCINOMA_VS_DUCTAL_NORMAL_DN	191	0.341871	1.4316	0.0140997	tags=10%, list=7%, signal=9%	EGR1/FOS/DUSP1/ATF3/FOSB/SF1/SOX9/RBPMS/SAMD4A/NDRG2/ARMCX4/FAM189A2/SOCS5/TRIP6/LTF/TNC/ZNF37BP/ST3GAL6/MICAL3
KOYAMA_SEMA3B_TARGETS_DN	KOYAMA_SEMA3B_TARGETS_DN	333	0.323325	1.43158	0.00330235	tags=23%, list=15%, signal=20%	SLCO4A1/HES1/ADM/GSTM1/ABCD1/CTSZ/NFKBIA/TAGLN2/KLF10/EPHX1/ATRN/ADORA2A/EFCAB2/FAM102A/JAG2/SVIL/MYL9/CALML4/DGKD/CPEB1/CXXC4/ATL1/PARVB/RASAL2/CORO7/ZNF775/GSTM4/CBFB/PMEPA1/KLF6/NCBP3/GDNF/ACTG1P25/ADGRG6/SYDE2/CDC73/FAM83H/EGFL7/GPC1/SRSF12/TERT/TRAF5/LMO4/DRAP1/CDC42SE1/ANKRD7/LUC7L3/ZCCHC14/SLC6A8/PHF7/PRR5L/KHDRBS3/ENG/NR3C2/HLX/PAXIP1/EFNA1/POLR1C/CD70/RSBN1/FOXP4/KCNG1/NKD2/PSMA8/PDE4DIP…
WP_HAIR_FOLLICLE_DEVELOPMENT_CYTODIFFERENTIATION_PART_3_OF_3	WP_HAIR_FOLLICLE_DEVELOPMENT_CYTODIFFERENTIATION_PART_3_OF_3	83	0.383865	1.42966	0.0243105	tags=11%, list=7%, signal=10%	FOS/JUN/FOSB/PHLDA1/SOX9/WIF1/PROM1/TP63/CD34
YAGI_AML_WITH_T_8_21_TRANSLOCATION	YAGI_AML_WITH_T_8_21_TRANSLOCATION	351	0.321244	1.42954	0.00206484	tags=31%, list=21%, signal=25%	AGRN/NFIX/BSG/CLDND1/FURIN/TRIO/ARHGEF6/NFRKB/FBLN5/KDM4B/SFN/UBA1/SOCS3/SCML1/NUMA1/MDK/SLC25A1/PLTP/PEBP1/SOCS5/TGIF1/PIK3R1/CLSTN1/FKBP8/ERF/RGS10/FZD5/GPS2/PNRC1/TLE5/DUSP14/MYRF/EPCAM/STAT5B/ANKLE2/AK4/CD34/HLA-DRB1/DGCR2/GPR6/JUP/PSD3/CDKN2D/GALNT2/GRM8/ADRA2C/POLR2J/BCL2L1/SMARCD2/TSR3/ADK/APP/ATXN1/U2AF1/LST1/TSC2/ZC3H13/TSPAN7/TNFRSF1A/ELF4/TMPRSS11D/RUNX1T1/MED12/TSPAN4/STIM1/DDAH2/KMT2…
JIANG_HYPOXIA_NORMAL	JIANG_HYPOXIA_NORMAL	187	0.341341	1.42928	0.00842973	tags=26%, list=16%, signal=22%	DUSP1/PPP1R15A/ZFP36/UBE2O/NFKBIA/SERPINE1/PKD1/CPNE1/MDK/HOXA4/NDRG2/FAM189A2/HLA-A/MAPK7/ENO2/TLNRD1/RHBDD3/ARHGEF2/MTCL1/SESN2/AK4/CORO1A/RFX3/SAP30BP/RIPK4/SQLE/TGM2/STXBP2/SERTAD2/KHDRBS3/ADAR/PIM2/CDC34/IL9R/MAP1LC3A/UBE2E1/TSC22D3/NCL/OBSL1/FASN/HMOX1/MCL1/PSMD6/STAU1/CAV1/GPATCH8/MVK/SNX9
HOWLIN_PUBERTAL_MAMMARY_GLAND	HOWLIN_PUBERTAL_MAMMARY_GLAND	62	0.408459	1.42918	0.0283441	tags=21%, list=12%, signal=18%	TNF/SLC30A1/MARCO/NFIL3/PROM1/SMS/MSR1/GSTA3/FOXA1/CFH/LSP1/APBB1IP/IL1R2
DELYS_THYROID_CANCER_DN	DELYS_THYROID_CANCER_DN	220	0.334186	1.42839	0.00796415	tags=23%, list=18%, signal=19%	EGR1/FOS/JUN/FOSB/IER2/CCN1/FAAH/FBLN5/MT1H/MT1X/MT1E/PDE10A/PAX8/EPB41L3/LTF/FBLN1/IRS1/KCNAB1/BCL2/PROM1/GFRA2/NEB/PRKX/TNFAIP8/ALDH4A1/RASSF9/FCGBP/KCNK2/SH3BGR/TOB1/MT1F/GAS1/TSPAN7/TSC22D3/EPB41L4B/ITM2A/SORBS2/NDRG4/MT1G/GHR/SH3BP5/RYR2/TLE1/NUCB2/LPAR1/CSRP2/SORD/LIMK2/NCAM1/SNTA1
REACTOME_CELL_SURFACE_INTERACTIONS_AT_THE_VASCULAR_WALL	REACTOME_CELL_SURFACE_INTERACTIONS_AT_THE_VASCULAR_WALL	128	0.360853	1.42802	0.0171013	tags=37%, list=25%, signal=28%	L1CAM/BSG/GRB7/SOS1/SRC/ATP1B1/LCK/SDC4/PF4V1/PIK3R1/GAS6/EPCAM/GPC1/MAG/TNFRSF10B/ITGA3/GRB2/SIRPG/SLC7A7/F2/TSPAN7/GYPB/CD177/CD99L2/SLC7A9/FN1/MERTK/CD44/CAV1/COL1A2/ITGA6/SLC7A6/PSG6/APOB/PPIA/PSG4/ANGPT4/PSG5/ATP1B2/SHC1/CD99/PIK3CA/PTPN6/IGLL1/CEACAM1/ITGAV/JCHAIN
YANG_BREAST_CANCER_ESR1_LASER_DN	YANG_BREAST_CANCER_ESR1_LASER_DN	44	0.42909	1.42697	0.041806	tags=25%, list=19%, signal=20%	BICD1/SOS1/ST3GAL6/SEC63/TTLL4/IFNAR2/FNDC3B/ACOT9/DSC2/ACAT2/MPP6
REACTOME_HDACS_DEACETYLATE_HISTONES	REACTOME_HDACS_DEACETYLATE_HISTONES	83	0.382922	1.42615	0.0247826	tags=30%, list=19%, signal=25%	GATAD2B/GATAD2A/MTA1/NCOR2/TBL1XR1/REST/H2BC11/SAP30L/GPS2/H2AC16/H2BC14/SAP18/MBD3/H2BC3/MTA2/HDAC8/H2BC17/BRMS1/H3C1/NCOR1/ARID4B/H4C1/H2BC13/ARID4A/H4C6
BRUINS_UVC_RESPONSE_MIDDLE	BRUINS_UVC_RESPONSE_MIDDLE	94	0.376462	1.42487	0.0260125	tags=33%, list=21%, signal=26%	DDIT3/OTUD4/FBRS/PPM1D/FCHSD1/PPP2R5D/BTG2/PIDD1/SAC3D1/TGIF1/ZFP64/TRIM13/CDAN1/DFFB/SAP30BP/SPRYD4/SEC24D/FBXO17/ADAL/KNOP1/GMIP/SHISAL2B/TLE1/ZFYVE21/TP53RK/LIMK2/CLUAP1/RAP2B/DDX41/ZNF263/ZXDC
GRAHAM_CML_DIVIDING_VS_NORMAL_QUIESCENT_DN	GRAHAM_CML_DIVIDING_VS_NORMAL_QUIESCENT_DN	83	0.382347	1.42401	0.0257266	tags=23%, list=16%, signal=19%	CXCL2/CXCL8/DUSP6/CXCL1/RBPMS/SVIL/IL1B/ADGRG6/ADAM8/CCNG2/HLX/PCDH9/H1-0/BIRC3/CYTIP/RABGAP1/CD44/SH3BP5/TM4SF1
KEGG_ADIPOCYTOKINE_SIGNALING_PATHWAY	KEGG_ADIPOCYTOKINE_SIGNALING_PATHWAY	62	0.406932	1.42383	0.02933	tags=24%, list=13%, signal=21%	TNF/NFKBIA/SOCS3/TRAF2/IRS1/PPARA/TRADD/ADIPOR1/PRKAG2/NFKBIB/RXRA/ACACB/AKT1/TNFRSF1A/STK11
BASSO_CD40_SIGNALING_DN	BASSO_CD40_SIGNALING_DN	67	0.3986	1.42365	0.0450161	tags=25%, list=14%, signal=22%	SH2B2/ID1/BTG2/RNF187/IRS1/BCL6/RERE/ST3GAL6/PTPN18/TTC9/LTB/USP6/PNOC/ITGB7/SLC39A7/RUNX1T1/TRIB2
WP_P53_TRANSCRIPTIONAL_GENE_NETWORK	WP_P53_TRANSCRIPTIONAL_GENE_NETWORK	61	0.406926	1.42361	0.0405186	tags=21%, list=10%, signal=19%	BAX/APAF1/SERPINE1/TP53AIP1/BTG2/PIDD1/TP53INP1/SESN2/GADD45A/ALDH4A1/GLS2/SIVA1/FAS
DURCHDEWALD_SKIN_CARCINOGENESIS_DN	DURCHDEWALD_SKIN_CARCINOGENESIS_DN	251	0.329776	1.42359	0.00457255	tags=23%, list=17%, signal=19%	FOS/CSRNP1/PHLDA1/ARID3A/ARAP2/SMAD7/PRCC/B4GALT1/DEDD/UBAP1/CADM1/PMEPA1/KLF6/PLK2/LARP4B/CCNY/ADAM12/RBM25/MYH9/NET1/SEMA4D/TIPARP/TNPO1/PIAS1/DCUN1D3/DIP2B/NPLOC4/CLIP1/TMX3/MYO5B/KIF1B/AHCYL2/LRP8/PIP5K1B/PFN1/RIPK4/STK3/SQLE/ACOX1/FLRT3/VGLL3/PXK/MAFK/GSK3B/CEP350/HMOX1/MXD1/ARNT/CMTM4/CD44/EAF1/C16orf72/CASTOR2/ENTR1/ASAP1/SNX9/YWHAZ/RNF38
VART_KSHV_INFECTION_ANGIOGENIC_MARKERS_UP	VART_KSHV_INFECTION_ANGIOGENIC_MARKERS_UP	155	0.346296	1.42236	0.0116848	tags=15%, list=15%, signal=13%	CXCL2/TNF/IL6/ADM/CCN1/GRB7/JAG2/IL1B/DLL3/WNT5B/SYN1/PROM1/ATG9B/EGFL7/S1PR1/GRB2/ENG/WNT10A/EFNA1/CCL5/EPHA8/PDGFB/HMOX1/TIMP2
PID_MTOR_4PATHWAY	PID_MTOR_4PATHWAY	63	0.403336	1.42038	0.0423453	tags=43%, list=30%, signal=30%	YWHAE/MAP2K2/TSC1/SFN/AKT1S1/IRS1/SREBF1/PRR5/CLIP1/DDIT4/TSC2/AKT1/RHEB/YWHAZ/PML/EIF4EBP1/FBXW11/MAPK1/CCNE1/IKBKB/RPTOR/ATG13/RAF1/PDCD4/MTOR/MLST8/POLDIP3
HELLER_HDAC_TARGETS_SILENCED_BY_METHYLATION_DN	HELLER_HDAC_TARGETS_SILENCED_BY_METHYLATION_DN	260	0.329	1.42027	0.00546278	tags=23%, list=17%, signal=20%	BHLHE40/DUSP6/ATF3/GDF15/MAFG/PPP1R15A/DDIT3/KLHL21/DNAJB1/PKD1/SRM/USF2/HNRNPUL1/CADM1/GSDMB/MYC/ECPAS/RAB15/WNT5B/BCL2/GGT1/SERPINH1/EPCAM/LRP8/NFE2L1/ST3GAL6/EIF5/CELF2/GADD45A/DDIT4/SEC24D/CCN4/BCL2L1/IFNAR2/BCL3/FAS/ALG8/PIM2/ANP32B/ITGB7/UBE2E1/ADCYAP1/POLR3E/HMOX1/ELF1/CYTIP/TSHR/PDIA6/TRIB1/TXNDC5/SUMO3/ST14/POU2AF1/FARP1/IRAK1/HERC4/CCR2/PMF1/IL6R/CHAC1/PXDN
UEDA_CENTRAL_CLOCK	UEDA_CENTRAL_CLOCK	86	0.378488	1.42004	0.0421817	tags=17%, list=9%, signal=16%	DUSP1/AKAP17A/HNRNPM/STX5/DNAJB1/CRY1/PLK2/UBE2S/NFIL3/CDK2AP2/HLA-DRB1/GADD45A/CHORDC1/SQLE/BCKDHB
MARTENS_BOUND_BY_PML_RARA_FUSION	MARTENS_BOUND_BY_PML_RARA_FUSION	422	0.314136	1.41985	0.00170835	tags=23%, list=16%, signal=19%	BHLHE40/PHF12/FOSB/NUAK2/DUSP5/UBE2O/TAGLN2/HMGA1/ATP6V0C/FAM53B/HNRNPM/ARID2/RAVER1/SIK1/FLNB/TMEM104/NCOR2/RAB3D/PKM/B4GALT1/FAM214B/BANP/CDS2/TOX2/CRTC1/FBXO46/ID1/GAS7/DNM2/MYH9/MYO9B/BANF1/WDR81/ARHGEF2/SMG6/RAP1GAP2/FRAT1/SMAD3/DCTN1/WNT5B/SREBF1/ADAM8/NBR1/TMCC2/MCM5/CRAMP1/FAM89B/SH3BGRL3/ACP5/CELF2/YTHDF2/RSRC2/SCARB1/AKNA/TNFRSF10B/DDIT4/CAMK2G/ZC3H12A/IFNAR2/B3GNT7/ATP2B4/TM9SF4/BCL3/S…
AMBROSINI_FLAVOPIRIDOL_TREATMENT_TP53	AMBROSINI_FLAVOPIRIDOL_TREATMENT_TP53	99	0.372823	1.41978	0.0202837	tags=26%, list=14%, signal=23%	CXCL2/PASK/SULT1A2/HELZ/CCDC85C/PIDD1/CDK2AP2/PEG10/DGKA/DMC1/LLGL2/PLCXD1/PDLIM7/NEMP1/KHK/ATP2A3/CAMK2G/CDKN2D/DVL3/NECAB3/NFATC2IP/ACACB/TCAF1/MED12/GABBR2/MXD1
WP_ANDROGEN_RECEPTOR_SIGNALING_PATHWAY	WP_ANDROGEN_RECEPTOR_SIGNALING_PATHWAY	88	0.377699	1.41962	0.0223242	tags=26%, list=16%, signal=22%	JUN/NCOR2/SRC/NCOA1/PSMC3IP/UBE3A/TGIF1/PIK3R1/EP300/PIAS1/ZNF318/SMAD3/TLE5/RNF4/STUB1/NR2C2/FHL2/KAT7/AKT1/GSK3B/NCOR1/CAV1/RAD9A
KEGG_ACUTE_MYELOID_LEUKEMIA	KEGG_ACUTE_MYELOID_LEUKEMIA	54	0.413909	1.41938	0.0499168	tags=57%, list=28%, signal=41%	MAP2K2/SOS1/PIK3R1/MYC/STAT5B/JUP/PIK3CD/GRB2/PIM2/STAT5A/AKT1/PIK3R3/RUNX1T1/PIM1/TCF7L1/PML/EIF4EBP1/PPARD/LEF1/AKT3/MAPK1/AKT2/PIK3CA/IKBKB/TCF7L2/CCNA1/STAT3/RAF1/SOS2/RARA/MTOR
FOURNIER_ACINAR_DEVELOPMENT_LATE_2	FOURNIER_ACINAR_DEVELOPMENT_LATE_2	273	0.328097	1.41789	0.00379522	tags=25%, list=18%, signal=21%	DUSP6/SPRY2/EPHA2/MT2A/GFPT1/ARHGDIA/NUP188/FLNB/MT1H/FOXM1/UBA1/ARF4/MT1X/MCM4/SSB/SAMD4A/FOSL1/DCAF15/SMTN/SNRPB/PAGR1/FEN1/RBM25/MYH9/DVL1/NUP153/ETV4/SMS/DROSHA/MCM2/PFN1/POLA1/UBE2K/PDLIM7/RCC1/AGFG1/SQLE/DDX11/CALM1/IMPDH1/ALG8/CDCP1/IGF2BP2/MT1F/ACOT9/PPP2R2A/TREX2/PRC1/AKT1/NT5DC2/CSNK2A1/LDLR/USP1/MELK/FN1/PDIA6/TXNDC5/SMPD4/GINS1/LDHA/IRAK1/ZWINT/PRPF40A/EEF1E1/NUSAP1/TIPIN/CDC25A/TTLL12
DAZARD_RESPONSE_TO_UV_NHEK_DN	DAZARD_RESPONSE_TO_UV_NHEK_DN	293	0.324852	1.41684	0.00349722	tags=28%, list=18%, signal=23%	NAV3/ARID3A/SMAD7/OTUD4/BCL7A/HELZ/PUM2/ID1/TLK2/TUT4/BAZ1A/SPOP/MYC/KIF11/TIPARP/IRS1/NUP153/ZNF318/MPHOSPH10/SMAD3/TAF5L/MTCL1/CCDC93/KEAP1/TRIM13/PTPN3/TP63/WDR82/KIF23/CYTH1/TTC9/DYRK2/NEMP1/TNFAIP8/BACH1/DDIT4/PSD3/XPO1/PIP4K2B/KANK1/ZCCHC14/USP6/BPTF/SERTAD2/PHIP/SHOC2/BAZ1B/KAT6A/DTX2/ADCY9/MTM1/RSBN1/LPCAT4/WDHD1/FAT1/INSIG2/HMGXB4/MAP3K5/CEP350/CNOT4/USP1/DUSP7/AJAP1/DKK1/TENT4A/SPEN/ELF…
VANHARANTA_UTERINE_FIBROID_DN	VANHARANTA_UTERINE_FIBROID_DN	61	0.404451	1.41495	0.0453809	tags=7%, list=1%, signal=7%	EGR1/ATF3/IER2/SMAD7
NIKOLSKY_BREAST_CANCER_16P13_AMPLICON	NIKOLSKY_BREAST_CANCER_16P13_AMPLICON	115	0.360321	1.41398	0.0228156	tags=25%, list=13%, signal=22%	ZNF598/WFIKKN1/PKD1/CAPN15/MAPK8IP3/NUBP2/NME4/LUC7L/KREMEN2/PKMYT1/TRAF7/TPSB2/CRAMP1/CHTF18/STUB1/EME2/RPUSD1/RHOT2/ZNF205/IL32/FBXL16/TSR3/ZG16B/TSC2/CIAO3/PGAP6/RHBDL1/CCDC78/RNF151
MORI_SMALL_PRE_BII_LYMPHOCYTE_DN	MORI_SMALL_PRE_BII_LYMPHOCYTE_DN	76	0.385235	1.41365	0.0300221	tags=24%, list=12%, signal=21%	IER2/PACS1/DNAJB1/NFATC3/C1QBP/NUMA1/ZYX/LY6H/BCL2/PIP4K2A/ATP1A1/ST3GAL6/XPO1/SET/TUBB4B/ANP32B/WDHD1/MOGS
LEI_MYB_TARGETS	LEI_MYB_TARGETS	305	0.322832	1.41239	0.0023127	tags=28%, list=20%, signal=23%	CXCL8/BHLHE40/IL6/MT1A/TRIO/STIP1/LY6E/SERPINE1/DNAJB1/NXF1/NFATC3/SFN/MYL9/MDK/IL1B/MT1X/TPX2/PLEC/IRF6/PLK2/DNAJA1/MSN/FEN1/MYC/CDK2AP2/TRIP6/SEMA3F/BAIAP2/SMAD3/AP2A2/ADGRG6/ATP5F1D/EPCAM/FADS2/MCM2/CTSK/LMTK2/MBOAT7/ATP2A3/JUP/TGM2/DHRS2/SERPING1/AP1G2/FHL2/ANP32B/MAP1LC3B/POR/TSC22D3/PFKL/RASA1/LAMB1/EPOR/KRT17/ACBD3/HMOX1/MCL1/SOX15/FN1/NDUFV1/OTUB1/CAV1/COL1A2/TFF3/RAC3/MICB/AXL/TM4SF1/EIF…
LASTOWSKA_NEUROBLASTOMA_COPY_NUMBER_UP	LASTOWSKA_NEUROBLASTOMA_COPY_NUMBER_UP	168	0.341348	1.41188	0.0182214	tags=35%, list=22%, signal=27%	UBE2O/CCDC47/PYCR1/PPM1D/JMJD6/SOS1/TBX2/ANAPC11/GAS7/FOXK2/NCBP3/WIPF2/CTDNEP1/BAIAP2/GPS2/SGSH/ETV4/NDEL1/ZBTB4/RFFL/MCRIP1/KHK/ATP2A3/SRSF1/LUC7L3/MRPL38/NTN1/JPT1/MINK1/ARHGAP23/BPTF/ACBD4/DUS1L/SEC14L1/MRPL12/TMEM106A/ANKRD40/DCAF7/NCOR1/MAP2K3/ANKFY1/DPH1/TIAF1/EIF4A3/SUPT4H1/HSD17B1/SRP68/SYNRG/MRPL58/NDUFAF8/GJC1/EME1/POLG2/TSEN54/MSI2/SLC30A6/TRPV2/DHX40
BENPORATH_MYC_TARGETS_WITH_EBOX	BENPORATH_MYC_TARGETS_WITH_EBOX	213	0.331581	1.41023	0.0104022	tags=27%, list=18%, signal=23%	JUN/JUNB/HES1/UCP3/SLC4A2/BAX/SMAD7/BSG/SERPINE1/SRM/FOXM1/ARF4/MCM4/FOSL1/MSN/ARSB/SIGMAR1/PLA2G4A/AMD1/HSP90AA1/BCL2/HSP90AB1/RHOG/SLC19A1/NOP2/TPM2/TERT/RCC1/IRF2/BCL3/APP/NSUN2/ACOX1/PIM2/NTN3/TSC2/DKC1/PSEN2/NCL/GSK3B/FASN/RPL22/VHL/IFRD2/RPL13A/MELTF/FAH/FGFR4/CD63/WT1/BMP4/FPGS/CFDP1/GAPDH/DBI/SRD5A1/SNHG5/CTSF
REACTOME_SIGNALING_BY_WNT	REACTOME_SIGNALING_BY_WNT	316	0.320275	1.40826	0.00351411	tags=24%, list=17%, signal=21%	VANGL2/RSPO4/ZNRF3/BCL9L/CSNK1E/SOX9/WIF1/CXXC4/ZRANB1/H2BC11/PPP2R5D/MEN1/KREMEN2/MYC/LRP5/EP300/ARRB2/DVL1/AP2A1/FRAT1/AP2A2/FZD5/WNT5B/CDC73/TLE5/PIP5K1B/PFN1/KMT2D/H2BC14/TERT/XPO1/LEO1/H2AX/DVL3/CALM1/WNT9B/GNAO1/H2BC3/WNT10A/PPP2CA/GNG8/WNT4/AP2M1/PYGO2/GNG2/TNRC6C/USP34/CHD8/AKT1/PPP2R1A/PSMA8/PPP3R1/CSNK2A1/GSK3B/H2BC17/DKK1/H3C1/PSMD6/CSNK1G2/PSMD3/CTNNBIP1/AP2S1/AGO4/TCF7L1/PRKCB/TLE3/D…
LINSLEY_MIR16_TARGETS	LINSLEY_MIR16_TARGETS	194	0.335173	1.40816	0.00814645	tags=28%, list=20%, signal=23%	EGR1/JUNB/RCE1/GFPT1/ATXN7L3/ARHGDIA/PACS1/SERPINE1/NACC2/SLC30A1/DEDD/FOXK1/CDS2/MAPRE3/LIMK1/DNAJB6/PPT2/FAM189B/DNAJC5/ST6GALNAC6/RNH1/PIP4K2A/KIF23/ATG9A/TNFRSF10B/H2AX/ATG16L1/RFK/TRUB1/UBTD1/POLR3G/KIF21A/SLC15A4/PLEKHM1/SLC39A7/IPPK/SLC39A5/KLHL26/IFRD2/ANKFY1/RPS6KA3/MICB/TMEM109/MKNK2/CDC25A/TGIF2/SFXN5/SLC9A1/SETD3/NOB1/F3/ANLN/PIP4P1/TMEM245
PURBEY_TARGETS_OF_CTBP1_NOT_SATB1_DN	PURBEY_TARGETS_OF_CTBP1_NOT_SATB1_DN	365	0.31502	1.40737	0.00211786	tags=28%, list=18%, signal=23%	KISS1/IER2/RCE1/ADAMTS1/SLCO3A1/PPP1R13L/GRM2/KLC2/KPNA1/MAPRE3/SHB/LCK/ABHD4/MAGEA4/PLEC/MEN1/CTTN/SYT12/PLK2/SNPH/SUPT20H/BET1L/SPOP/TNFRSF25/MMP17/SCN9A/SERPINH1/TESK2/EXOC2/WDR76/NEB/ACP5/TAC3/PLCXD1/ARHGAP25/LMO1/AKNA/DDIT4/F8A1/FBXO9/PTP4A3/CDKN2D/MICU1/HS6ST1/PIK3CD/SIVA1/WWTR1/ATE1/MT3/PHIP/TUBA3D/PYROXD1/DSCC1/CLK3/AKIRIN2/HSF2/NR3C2/KLF2/GPATCH2L/CABLES1/APBB1IP/PPP2R1A/KLF12/CRYBA1/SLC…
LEE_AGING_CEREBELLUM_DN	LEE_AGING_CEREBELLUM_DN	67	0.393927	1.40697	0.0498392	tags=31%, list=20%, signal=25%	CCN1/NFKB2/ACTA1/NAB2/LIN7B/TNC/SERPINH1/MEF2A/CAMK2G/MYL4/DHX38/SMTNL2/ITM2A/SAYSD1/MERTK/ZIC2/DBP/FABP7/JRK/CARS1/SLC4A1
ASTON_MAJOR_DEPRESSIVE_DISORDER_DN	ASTON_MAJOR_DEPRESSIVE_DISORDER_DN	154	0.342223	1.40641	0.0237505	tags=18%, list=10%, signal=17%	SLC4A2/SLF2/SF1/FAM53B/RNF19B/CLDND1/TRIO/ATM/STIP1/DICER1/PTK2B/PIK3R1/MYO9B/EP300/CDK18/AMD1/TMC6/MTMR2/MYRF/KIF1B/LRP8/FOLH1/MAG/LMO4/ABCA2/DDX11/KIF13B/PCBP2
KARLSSON_TGFB1_TARGETS_UP	KARLSSON_TGFB1_TARGETS_UP	114	0.359921	1.40631	0.0279447	tags=32%, list=19%, signal=26%	BHLHE40/SALL1/MMP14/SRM/ZYX/BMP1/BAZ1A/PMEPA1/GTF2F2/KLF6/MSN/MYC/EIF4G1/REPS2/LRP8/EIF5/RCC1/GNL3/SET/NSUN2/CDC34/CCT3/NCL/MYBBP1A/DDX21/LYAR/CD44/SLTM/DPY19L1/EIF3B/CDK17/COQ10B/EEF1E1/PPRC1/CCT8/HSPD1
KEGG_JAK_STAT_SIGNALING_PATHWAY	KEGG_JAK_STAT_SIGNALING_PATHWAY	145	0.347497	1.40551	0.0122244	tags=37%, list=25%, signal=28%	IL6/SPRY4/SPRY1/SPRY2/CLCF1/SOS1/SOCS3/CBL/SOCS5/PIK3R1/MYC/EP300/PIAS1/IL20RB/STAT5B/CNTFR/IL9/BCL2L1/PIK3CD/IFNAR2/GRB2/IL3/STAT5A/IFNE/IL9R/CTF1/AKT1/PIK3R3/EPOR/PIM1/GHR/SPRED2/IFNA21/IL6R/OSM/GH2/IL13RA1/IRF9/IL7/IL5/AKT3/LIF/PIAS3/GH1/AKT2/PIK3CA/CSF2RA/PTPN6/IL15RA/CREBBP/CSH1/IL7R/IFNA10
KEGG_FC_EPSILON_RI_SIGNALING_PATHWAY	KEGG_FC_EPSILON_RI_SIGNALING_PATHWAY	74	0.384421	1.40379	0.0427215	tags=27%, list=16%, signal=23%	TNF/MAP2K2/VAV3/SOS1/VAV2/MAP2K7/PLA2G2C/PIK3R1/PLA2G4A/GAB2/PIK3CD/GRB2/IL3/PLA2G12B/PLA2G2A/AKT1/PIK3R3/MAP2K3/PRKCB/RAC3
WINTER_HYPOXIA_METAGENE	WINTER_HYPOXIA_METAGENE	232	0.32744	1.40225	0.00786005	tags=20%, list=16%, signal=17%	EGR1/FOS/JUN/CXCL8/BHLHE40/IL6/ADM/DDIT3/NFKB2/SERPINE1/EDN1/PKM/PFKFB3/HYOU1/IRF6/NFIL3/ERRFI1/PPARA/VEGFB/PNN/CCNG2/DDIT4/BCL2L1/PGK2/TGM2/SLC6A8/PIM2/ENG/TPI1/POLM/EFNA1/DKC1/BPI/RRP9/PFKL/TIMM17A/PDGFB/HK2/HMOX1/HK1/PIM1/IGFBP2/FN1/SLC6A6/TFF3/EIF4A3
REACTOME_HDR_THROUGH_HOMOLOGOUS_RECOMBINATION_HRR	REACTOME_HDR_THROUGH_HOMOLOGOUS_RECOMBINATION_HRR	60	0.400103	1.4022	0.0497592	tags=43%, list=25%, signal=33%	ATM/POLE/TOP3A/SPIDR/RAD1/EME2/RAD51B/RFC1/RAD17/ATR/RBBP8/HUS1/ATRIP/RAD9A/RAD9B/RPS27A/EME1/POLD1/RAD51/WRN/RAD50/POLD3/RMI2/RAD51C/BARD1/POLD2
MARKEY_RB1_CHRONIC_LOF_UP	MARKEY_RB1_CHRONIC_LOF_UP	107	0.361776	1.40201	0.0367205	tags=15%, list=9%, signal=14%	EGR1/NFIX/ST3GAL4/LSS/PLTP/NME4/CYTH3/CBFB/UHRF1/SEMA3F/MAP3K4/SCMH1/MCM2/POLA1/SQLE/SIVA1
MULLIGHAN_MLL_SIGNATURE_2_DN	MULLIGHAN_MLL_SIGNATURE_2_DN	257	0.323931	1.39965	0.00552698	tags=23%, list=16%, signal=20%	CXCL2/CXCL8/AGRN/IER2/SPRY1/ATP2A2/NAA16/ARAP2/N4BP2L2/RBPMS/PYCR1/VAV3/ATP1B1/MDK/GTPBP3/NME4/POLE/GSDMB/SLC12A4/TNFRSF25/NET1/LHFPL2/DUSP14/MYRF/EGFL7/STAT5B/ANKLE2/PRKCH/CD34/ATP2A3/RPL36/PTP4A3/ADK/APP/MRPS2/MRC1/WASF1/STAT5A/TNPO2/H1-0/FAAP20/USP34/NPM1/TSPAN7/TEX10/UBE2E1/RPS6KA2/RUNX1T1/FAM171A1/MCF2L/ITM2A/CETP/KMT2A/SLC18A2/SLC7A1/RASL10A/P2RX3/FAH/ADRM1
SANA_TNF_SIGNALING_UP	SANA_TNF_SIGNALING_UP	77	0.380129	1.39877	0.0470958	tags=16%, list=9%, signal=14%	CXCL2/CXCL8/NFKBIA/SERPINE1/PLA1A/CSF1/DNAJA1/HLA-A/SMAD3/TAPBP/IL32/HLA-C
AFFAR_YY1_TARGETS_UP	AFFAR_YY1_TARGETS_UP	190	0.334145	1.39787	0.00986437	tags=22%, list=18%, signal=18%	FOS/DUSP1/PPP1R15A/EPHA2/PFKFB2/ABCC5/SFN/SRC/TBX2/CPEB1/ZNF385A/PLTP/TINAGL1/SPAG1/HM13/BTG2/TP53INP1/TNNC2/DMPK/PTP4A3/BCL2L1/TGM2/FAS/RNF41/ACOX1/HSF2/CFH/AJUBA/DSTYK/CHODL/KIF17/WT1/BMP4/MYH3/FAM9C/HSD17B1/ACTC1/BAK1/LGALS9/KLRB1/MYL1/CTSF
MATSUDA_NATURAL_KILLER_DIFFERENTIATION	MATSUDA_NATURAL_KILLER_DIFFERENTIATION	447	0.308315	1.39771	0.00195504	tags=20%, list=15%, signal=18%	FOS/JUN/BHLHE40/BICD1/RNF19B/CYP24A1/GEM/PKM/CALML4/SOCS3/TEX21P/IL1B/CPEB1/MAP2K7/TACC3/MAGI1/SEC61A2/FKBP1A/GRWD1/IGFBP4/MATK/UBE3A/CSRP1/CADM1/ITSN1/PMEPA1/SV2A/KLF6/PLBD2/EPB41L3/FEN1/LY6H/IPO4/MARCKSL1/RELL1/KIF11/LYST/HSP90AA1/PDE7A/TP63/MCM5/MCM2/KIF1B/ATMIN/ST3GAL6/STAT5B/CORO1A/NOP2/TAB1/ATP13A2/CAMK4/RHOT2/UPF1/FAM160A2/CCDC117/PRMT1/MRPL38/WWTR1/KCTD12/CBARP/ENG/ARMC6/TPI1/TNPO2/MRPL12…
YAMAZAKI_TCEB3_TARGETS_UP	YAMAZAKI_TCEB3_TARGETS_UP	158	0.339251	1.39699	0.0158808	tags=31%, list=23%, signal=24%	CCN1/CTSZ/FURIN/YPEL2/GRINA/ATP1B1/ZYX/ARF4/IGFBP4/PARVB/FAM189A2/PRPF38B/TLNRD1/WARS1/GLUL/SERPINH1/CYP26A1/DYRK2/RNF24/BACH1/SURF4/GALNT2/CALM1/SERPING1/APP/FLRT3/EPOP/RRBP1/CST3/LAMB1/HSDL1/SLC7A1/GHR/CUL1/SFMBT2/TYRO3/PXDN/FBXL22/GNAS/F3/TCERG1/NR2F2/TMED2/LPP/KALRN/PTPN9/STARD10/SYCP3/HSPG2
STEIN_ESRRA_TARGETS_DN	STEIN_ESRRA_TARGETS_DN	101	0.365951	1.39628	0.0365707	tags=33%, list=20%, signal=26%	RGS19/ASB6/GFPT1/TRIO/SSB/DCAF15/SIGMAR1/PRKD2/GATAD1/DBNDD1/KIDINS220/TNFAIP8/RFXANK/CCNG2/ADRA2C/BPTF/PHIP/SEC14L1/TFE3/TERF1/TCAF1/LAMB1/CSNK1G2/DCTD/TRAM2/ARID4A/ZNF24/CDC23/KANK2/ATG2B/PLS1/NR2F2/H2BC10
KIM_BIPOLAR_DISORDER_OLIGODENDROCYTE_DENSITY_CORR_DN	KIM_BIPOLAR_DISORDER_OLIGODENDROCYTE_DENSITY_CORR_DN	82	0.376167	1.39561	0.0393701	tags=21%, list=17%, signal=17%	TNF/KISS1/EPHA2/SERPINE1/B3GALT5/SBNO2/HRK/PAX7/IL3/DTX2/GPR18/MAFK/FGA/LTA/CDSN/BMP4/PYY
MULLIGHAN_MLL_SIGNATURE_1_DN	MULLIGHAN_MLL_SIGNATURE_1_DN	228	0.325737	1.39512	0.00722531	tags=24%, list=16%, signal=21%	CXCL2/CXCL8/AGRN/SPRY1/NAA16/HSF4/RBPMS/PYCR1/ZSWIM8/ATP1B1/MDK/GTPBP3/POLE/GSDMB/PPT2/FAM117A/SLC12A4/NET1/LHFPL2/MYRF/EGFL7/STAT5B/ATP2A3/RPL36/HSPB2/PTP4A3/BCKDHB/ADK/APP/MRPS2/MRC1/WASF1/STAT5A/TNPO2/FAAP20/USP34/NPM1/TSPAN7/UBE2E1/RUNX1T1/FAM171A1/MCF2L/ITM2A/CETP/KMT2A/SLC18A2/GTDC1/SLC7A1/RASL10A/RPL13A/TSHR/CAV1/P2RX3/FAH/ADRM1
MANNE_COVID19_COMBINED_COHORT_VS_HEALTHY_DONOR_PLATELETS_UP	MANNE_COVID19_COMBINED_COHORT_VS_HEALTHY_DONOR_PLATELETS_UP	164	0.33768	1.39463	0.023785	tags=28%, list=19%, signal=23%	DDIT3/HMGA1/TBC1D22B/MIIP/LY6E/SRM/CERCAM/IDUA/MT1X/MAPRE3/LTBR/MMP17/WNT5B/SERPINH1/FAM83H/MGAT5B/CMTM7/TAPBP/TPM2/TNFRSF18/LMO4/VASN/SLC6A8/FAM174C/RSAD2/SHISA4/MRPL12/HLX/PARP12/EFNA1/RNF213/POR/TEX10/TSPAN4/FAM131C/METRN/EMID1/KIFC2/ITPKC/APLP1/FKBPL/IFITM3/TGIF2/MPP6/PLD6/LGALS3BP
MIYAGAWA_TARGETS_OF_EWSR1_ETS_FUSIONS_UP	MIYAGAWA_TARGETS_OF_EWSR1_ETS_FUSIONS_UP	248	0.323774	1.39441	0.00653764	tags=29%, list=20%, signal=23%	DUSP6/GSTM1/EPHA2/AKAP13/SULT1A2/RNF19B/ARHGEF6/FBLN5/DGKD/ZNF703/TOX2/ERCC6/TBL1XR1/KDSR/KASH5/FKBP1A/SMAGP/GSTM4/CMTM3/CSPG5/FOXL2/SYNE2/PPARA/SEMA3F/ECSCR/SSBP3/IER5L/RGS10/PAQR5/C1QL1/EPHB2/ATP1A1/TMEM164/TSPAN13/SLC35F2/HSPB2/BCL2L1/TGM2/HIPK1/FAS/KCTD12/GCH1/KLF2/ADCY9/CABLES1/ST3GAL5/TSC22D3/EPOR/DCAF7/TMEFF2/IGFBP2/NKX2-2/DPF3/TRIB1/ASAP1/MGARP/FARP1/TM4SF1/LGALS8/FAM43A/SORD/EVA1B/PLCD3/…
DUTERTRE_ESTRADIOL_RESPONSE_24HR_DN	DUTERTRE_ESTRADIOL_RESPONSE_24HR_DN	473	0.306689	1.39378	0.00283985	tags=25%, list=19%, signal=21%	EGR1/DUSP1/JUN/JUNB/GDF15/CSRNP1/HES1/DDIT3/NUAK2/L1CAM/ARAP2/GRB7/SENP2/PACS1/YPEL2/EDN1/ABCC5/ATP1B1/DAPK3/ZYX/SAMD4A/SKIL/DUSP10/PPP4R2/ABHD4/BTG2/IRF6/CSRP1/PMEPA1/KLF6/PLK2/TP53INP1/ERRFI1/MTAP/MYH9/CPEB2/RAP1GAP2/SMAD3/LYST/LHFPL2/ADGRG6/MTCL1/PNRC1/SYDE2/TP63/PRR5/ARHGAP12/SESN2/FAM171B/RIT1/CYP1A1/GADD45A/CAB39/TRAF5/CCNG2/RIPK4/DDIT4/NBEAL1/PSD3/PDLIM1/GAB1/SEPSECS/WWTR1/BCKDHB/GOLGA4/FH…
BILD_MYC_ONCOGENIC_SIGNATURE	BILD_MYC_ONCOGENIC_SIGNATURE	193	0.331861	1.39292	0.0127167	tags=31%, list=20%, signal=25%	UBALD1/PHF1/NFKB2/SRM/DDX10/FCHSD1/SMTN/TUBA1A/NLRP1/FAM193B/PLEC/PC/MYC/IPO4/KHNYN/ADAM8/DGKA/STMN3/PA2G4/PRR5/SLC19A1/NOP2/PDLIM7/CCNG2/TWNK/TGM2/GNL3/CDCA8/SLC6A8/ATP2B4/SPTAN1/ANAPC1/NOP56/ANGEL1/SFXN4/DKC1/RNF213/NPM1/SNORD30/RRP9/NCL/MYBBP1A/CCDC86/CCDC78/DDAH2/ADGRF1/DPH1/FARP1/GOLGA2/SORD/HS6ST2/NTF4/DHODH/UTP20/TTLL12/PLD6/HSPD1/FAM86C1P/IRF9/VAMP1
BONOME_OVARIAN_CANCER_SURVIVAL_SUBOPTIMAL_DEBULKING	BONOME_OVARIAN_CANCER_SURVIVAL_SUBOPTIMAL_DEBULKING	470	0.305558	1.38813	0.00168891	tags=26%, list=17%, signal=23%	BICD1/HMGA1/ASB6/ARHGEF1/ATXN2L/CLCF1/TWF2/DEDD/EHMT2/VAV2/SIPA1/DCAF15/SMAGP/IGFBP4/MATK/MAPK8IP3/PAX8/PHF14/GAS2L1/CSF1/FAM83E/EPB41L3/VAC14/PIK3R1/SPOP/ASPSCR1/SLC12A4/TNFRSF25/FKBP8/MTAP/IPO4/MYO9B/CDK18/IRS1/TNPO1/KCNAB1/ARHGEF2/SEMA3F/BAIAP2/ADAM8/CCSER2/DBNDD1/LRRC8E/ZER1/STAT5B/SEC63/PATJ/TRAF3/OGFR/TWNK/RCC1/UPF1/PSD3/CDKN2D/STK32C/DDX11/ICMT/DCHS1/CSGALNACT2/IFNAR2/ILRUN/SMPDL3B/RANBP3/…
PURBEY_TARGETS_OF_CTBP1_AND_SATB1_UP	PURBEY_TARGETS_OF_CTBP1_AND_SATB1_UP	72	0.38293	1.38672	0.0478469	tags=21%, list=14%, signal=18%	BHLHE40/YWHAE/TMEM184B/ATN1/CPNE1/TUBA1A/LCK/PPP1CA/PKMYT1/SQLE/EIF2AK3/GPR135/DDX17/RETREG2/PIM1
KASLER_HDAC7_TARGETS_1_UP	KASLER_HDAC7_TARGETS_1_UP	181	0.333122	1.38637	0.0170154	tags=27%, list=16%, signal=23%	SYVN1/ATP2A2/ZNF707/SLCO3A1/ASB6/C2CD2L/MIER2/GPAA1/B4GALT1/DAPK3/CPEB1/DUSP10/CLPTM1/C4orf54/MAZ/RNF187/CLSTN1/SEMA4D/ARHGEF2/BCL6/TESK1/BCL2/WDR82/FBXL6/HSPBP1/MARCHF3/DFFB/DNMT3A/SHKBP1/PIK3CD/GRB2/RAB1B/MRPS2/BVES/STAT5A/LSP1/GPAT4/ANKRD9/ST3GAL5/RHOBTB2/B4GALT3/TDP1/FASN/DDX21/CYTIP/SHISA5/LTA/TRIB1
TONKS_TARGETS_OF_RUNX1_RUNX1T1_FUSION_ERYTHROCYTE_UP	TONKS_TARGETS_OF_RUNX1_RUNX1T1_FUSION_ERYTHROCYTE_UP	143	0.341842	1.38581	0.0176991	tags=20%, list=11%, signal=18%	JUN/DUSP6/GDF15/SLCO4A1/RBPMS/JAG2/SOCS3/PLTP/SCG5/IL17RB/ID1/KLF6/PLK2/ADAMTSL4/PNRC1/DHRS9/AP1S1/CYP1A1/LILRB1/PTP4A3/GIPC1/SPTAN1/APP/SLC5A3/ATXN1/FNDC3B/KLF2/ADCY9
MANALO_HYPOXIA_DN	MANALO_HYPOXIA_DN	272	0.320013	1.38435	0.00617751	tags=25%, list=18%, signal=20%	SLCO4A1/LETM1/PPIF/HMGA1/CTPS1/MNS1/TOR3A/NUP188/SRM/C1QBP/MCM4/GRWD1/ID1/TPX2/PSMC3IP/TOP3A/MAZ/UBE2S/FEN1/AMDHD2/PKMYT1/IPO4/PRMT7/PA2G4/MCM5/KIF23/MCM2/SLC19A1/LRP8/HNRNPD/TTLL4/TSFM/DGCR2/DDX11/PUS1/SEH1L/TUBB4B/ARMC6/NOP56/POLR3G/DKC1/PRC1/ORC6/SLC5A6/DPAGT1/RRP9/POMT2/DHX35/USP1/FASN/DDX21/MELK/MAP2K3/GLRX2/CCNA2/GEMIN2/GINS1/NDUFAF4/ACAT2/ZWINT/ASF1B/EEF1E1/POLR3K/PPARD/NUSAP1/TIPIN/UTP20
BONCI_TARGETS_OF_MIR15A_AND_MIR16_1	BONCI_TARGETS_OF_MIR15A_AND_MIR16_1	90	0.365711	1.38391	0.0438185	tags=32%, list=19%, signal=26%	SMAD7/KCNJ2/DEDD/FOSL1/KDSR/BTG2/KCNAB1/CPEB2/BCL2/PTPN3/KIF23/KANK1/BPTF/KIF21A/PCDH9/HAS2/SELENOI/AGO4/PIM1/CRKL/GHR/ESRRA/TRIM36/MOB4/PAPPA/SPEG/CDC25A/PPRC1/TGIF2
WP_3Q29_COPY_NUMBER_VARIATION_SYNDROME	WP_3Q29_COPY_NUMBER_VARIATION_SYNDROME	68	0.38761	1.38317	0.0487805	tags=22%, list=13%, signal=19%	JUN/RNF168/HAMP/ATM/MYC/SENP5/FBXO45/STAT5B/GRB2/MYCBP2/STAT5A/AKT1/NCBP2/PIK3R3/CEP350
SATO_SILENCED_BY_METHYLATION_IN_PANCREATIC_CANCER_1	SATO_SILENCED_BY_METHYLATION_IN_PANCREATIC_CANCER_1	379	0.308084	1.38181	0.00371791	tags=26%, list=22%, signal=21%	TNF/IER3/DUSP6/GDF15/HBEGF/DUSP5/KCNJ2/SALL1/NFKB2/SERPINE1/CD52/NCOR2/SVIL/TRAFD1/SFN/IL1B/TBX2/DUSP10/TAP2/RASSF1/LCK/MAPK8IP3/CSF1/ITSN1/PRDM14/LIN28A/MICALL1/SLC12A4/FOXL2/FAM182B/PRMT7/TMEM51/LDOC1/SMAD3/L1TD1/ADAM8/CCL4/LMTK2/HIF3A/LTB/DGCR2/CD22/ROBO3/IL32/CBX8/STXBP2/KHDRBS3/SSUH2/WNT4/HLA-B/CCL5/CST2/SLC7A7/CHRM2/DOK4/RHOBTB2/PIK3R3/SSX5/JHY/BIRC3/HSPA2/KMT2A/PHC1/GAMT/LRRC23/ITGA7/ATP4B…
COULOUARN_TEMPORAL_TGFB1_SIGNATURE_DN	COULOUARN_TEMPORAL_TGFB1_SIGNATURE_DN	130	0.347867	1.38028	0.0304883	tags=18%, list=10%, signal=16%	DUSP6/ZSWIM4/NFKBIA/ARID3A/CHKA/HAMP/CLUH/STX5/SVIL/SLC26A1/MAPRE3/IGFBP4/SLC23A2/TSPYL2/TP53INP1/ERRFI1/GLUL/MOSPD3/NDEL1/GADD45A/BMPR2/DUS1L/SLC35C1
BLANCO_MELO_RESPIRATORY_SYNCYTIAL_VIRUS_INFECTION_A594_CELLS_UP	BLANCO_MELO_RESPIRATORY_SYNCYTIAL_VIRUS_INFECTION_A594_CELLS_UP	255	0.31929	1.37802	0.00910113	tags=11%, list=7%, signal=10%	EGR1/CXCL2/TNF/CXCL8/ATF3/IL6/HBEGF/NAV3/PPP1R15A/IGFN1/CORO2B/CXCL1/CDK5R2/SOCS3/IL1B/SAMD4A/CSF1/PTPRE/SDC4/WARS1/SORCS2/TNC/ENTPD7/IL20RB/CCL4/CLMP/CREB5
BROWN_MYELOID_CELL_DEVELOPMENT_UP	BROWN_MYELOID_CELL_DEVELOPMENT_UP	154	0.335246	1.37774	0.0315945	tags=19%, list=17%, signal=16%	EGR1/TNF/JUNB/GSTM1/GRINA/CD52/IL1B/ZYX/CCDC125/G6PD/TP53INP1/CLEC4C/BOLL/ATP6V1B2/HLX/MYO1B/EDAR/IL1R2/TNFRSF1A/MCL1/MXD1/SLC6A6/CD44/FCGR2A/CLEC4A/PZP/CCR2/CEBPD/TNNT3/HEXB
AMUNDSON_RESPONSE_TO_ARSENITE	AMUNDSON_RESPONSE_TO_ARSENITE	207	0.325191	1.37603	0.0156418	tags=26%, list=20%, signal=21%	JUNB/ATF3/MAFG/DDIT3/KDM2A/N4BP2L2/TSC1/MT1H/MT1X/PLTP/MT1E/TOP3A/DNAJA1/DNAJB6/MAPK7/WARS1/CHERP/SERPINH1/TULP4/NFE2L1/RIT1/PTPRB/RCC1/TNFRSF10B/BCL3/INTS6/MT3/FHL2/MT1F/TFE3/PAXIP1/AHSA1/POLR1C/NPM1/KLF12/ST3GAL5/TSC22D3/UBE2H/TIMM17A/ARIH1/SOD1/MT1G/ESRRA/DYRK1A/ZNF254/SIAH2/SPARCL1/EIF4EBP1/MARS1/ZNF24/HNRNPAB/CCT8/ANLN/CARS1
LIU_SOX4_TARGETS_DN	LIU_SOX4_TARGETS_DN	295	0.314481	1.37446	0.00868923	tags=26%, list=18%, signal=22%	SIN3B/HMGA1/GPATCH2/AKAP17A/PKN1/NFIX/MTMR3/GRB7/OPA1/TMEM259/UBE3C/STIP1/MTA1/RAB3D/CAPN15/PGGT1B/TUBA1A/PSMC3IP/MEN1/RBCK1/UBE3B/ARMH3/LRP5/RAD1/MAP3K4/FAM83H/MOCS3/SMC3/ANKLE2/CTDP1/MICAL3/PRKCH/KIAA0319L/CCNG2/SRSF1/DDX11/GAA/PRMT1/SIVA1/DIS3/PRPF8/DUS1L/RNF41/FSTL3/WBP2/PPP2R2A/USP34/TSC22D3/SCAMP1/PFKL/NCOA6/LARP1/TMEM80/ITGB1BP1/PCGF6/SORBS3/AP2S1/RBM10/ITPK1/GEMIN2/STAU1/MELTF/MVK/SMPD4/S…
DACOSTA_UV_RESPONSE_VIA_ERCC3_COMMON_DN	DACOSTA_UV_RESPONSE_VIA_ERCC3_COMMON_DN	455	0.30211	1.37195	0.00273212	tags=26%, list=20%, signal=21%	DUSP1/JUN/BHLHE40/CCN1/KLF10/IPO7/OPA1/TRIO/SERPINE1/FLNB/SOS1/HELZ/PUM2/NCOA1/CDS2/SAMD4A/G6PD/SHB/ID1/TLK2/SOCS5/FOXK2/CRY1/TUT4/UBE3A/BAZ1A/ITSN1/GTF2F2/KLF6/LARP4B/NFYC/SPOP/MYC/KIF11/TIPARP/R3HDM2/IRS1/NUP153/SMAD3/LHFPL2/ADGRG6/MTCL1/CCDC93/CCSER2/NUMB/CLIP1/PIP4K2A/SPECC1L/ARHGAP12/KIF23/MICAL3/PICALM/NPEPPS/STK3/XPO1/USP6/GOLGA4/BPTF/UPF2/WDR43/PHIP/AGAP1/MYCBP2/KAT6A/SEC14L1/PPP2CA/MYO1B…
NIKOLSKY_BREAST_CANCER_17Q21_Q25_AMPLICON	NIKOLSKY_BREAST_CANCER_17Q21_Q25_AMPLICON	314	0.311188	1.36958	0.0061613	tags=18%, list=12%, signal=16%	CEP112/TMEM94/LRRC45/KCNJ2/ARHGDIA/CCDC47/SOX9/YPEL2/TMEM104/PPM1D/TRIM47/METRNL/HELZ/MAP3K3/SOCS3/TBX2/TLK2/UBE2Z/OGFOD3/FOXK2/KCTD2/FAM117A/SPOP/ASPSCR1/BAIAP2/TMC6/NPLOC4/NFE2L1/CYTH1/LLGL2/SAP30BP/CCDC57/PPP1R27/CACNG4/ITGA3/SCN4A/LUC7L3/SMARCD2/MRPL38/JPT1/GRB2/BPTF/DUS1L/STRADA/ACOX1/AATK/TOB1/WBP2/MRPL12/B3GNTL1/GRIN2C/CSNK1D/HID1/KAT7/LINC00482/TNRC6C/ABCA9
REACTOME_MAPK_FAMILY_SIGNALING_CASCADES	REACTOME_MAPK_FAMILY_SIGNALING_CASCADES	314	0.311183	1.36956	0.0061613	tags=21%, list=17%, signal=18%	DUSP1/JUN/DUSP6/IL6/HBEGF/RCE1/DUSP5/DLG4/MAP2K2/SPTBN4/DNAJB1/SOS1/SRC/DUSP10/GFRA3/RGL3/PEBP1/PPP2R5D/RASAL2/PIK3R1/GDNF/MYC/IRS1/ARRB2/GFRA2/PTPN3/ETV4/XPO1/CAMK2G/BCL2L1/ICMT/CALM1/GRB2/IL3/SPTAN1/SHOC2/FGG/PPP2CA/FGF6/NF1/APBB1IP/TNRC6C/DUSP8/PPP2R1A/PSMA8/ARRB1/ARTN/FGF20/RASA1/DUSP7/FGA/PDGFB/PSMD6/PSMD3/PRKACG/AGO4/PTPN7/FN1/DLG3/MAP3K11/SPRED2/PSMB8/FGFR4/TNRC6A/DAB2IP/IL6R
MCBRYAN_PUBERTAL_BREAST_6_7WK_UP	MCBRYAN_PUBERTAL_BREAST_6_7WK_UP	183	0.327746	1.36661	0.023512	tags=40%, list=30%, signal=28%	SOD3/NFIX/PPP6R3/SOX9/NFATC3/IP6K1/PTK2B/GID4/LCK/IGFBP4/CYGB/NDST1/NFIL3/PIK3R1/DNM2/LRP5/ARHGEF2/EIF4G1/WNK1/KEAP1/FADS2/CYTH1/KDM5C/STAT5B/CORO1A/OGFR/GALNT2/NR2C2/FGG/EIF4EBP2/CNOT3/HIPK2/AKT1/CSNK2A1/TIMP2/IL6R/MAPK14/EPB41L2/JAG1/TAOK1/DDX6/DAPK1/LASP1/CUX1/BPNT1/SORBS1/SNTB2/MBTPS1/SFTPD/EGLN1/RAB5C/SLC38A10/AKT2/EXTL3/SCD/JCHAIN/RAD23A/EHD3/PPP2R5B/PRRX1/LIPG/PTEN/KIF1C/GPD1/XIST/AKAP9/KC…
REACTOME_TCF_DEPENDENT_SIGNALING_IN_RESPONSE_TO_WNT	REACTOME_TCF_DEPENDENT_SIGNALING_IN_RESPONSE_TO_WNT	219	0.319462	1.36624	0.0153578	tags=25%, list=16%, signal=21%	RSPO4/ZNRF3/BCL9L/CSNK1E/SOX9/WIF1/CXXC4/H2BC11/PPP2R5D/MEN1/KREMEN2/MYC/LRP5/EP300/DVL1/FRAT1/FZD5/CDC73/PIP5K1B/KMT2D/H2BC14/TERT/XPO1/LEO1/H2AX/DVL3/H2BC3/PPP2CA/WNT4/PYGO2/USP34/CHD8/AKT1/PPP2R1A/PSMA8/CSNK2A1/GSK3B/H2BC17/DKK1/H3C1/PSMD6/CSNK1G2/PSMD3/CTNNBIP1/TCF7L1/TLE3/DKK2/CAV1/PSMB8/CBY1/RNF146/TLE1/H4C1/YWHAZ
DAVICIONI_MOLECULAR_ARMS_VS_ERMS_DN	DAVICIONI_MOLECULAR_ARMS_VS_ERMS_DN	176	0.3287	1.36495	0.0251654	tags=30%, list=18%, signal=24%	NAV3/IER2/GSTM1/ADGRL1/SLC43A3/LY6E/GPAA1/ITM2C/BMP1/EMP3/PLK2/TRIP6/ERF/KHNYN/FBLN1/RGS10/RHOG/SERPINH1/LTBP4/TP63/HIF3A/PSD3/PTP4A3/GALNT2/DENND1A/TRAPPC9/KCTD12/IGF2BP2/NYNRIN/FNDC3B/OLFML3/AKIP1/RRBP1/TNFRSF1A/OBSL1/ITM2A/FAM160B2/DUSP7/TRIB2/KAZN/SORBS3/CNNM4/RBMS3/SH3BP5/PRAME/MFAP2/LPAR1/BMP4/CPM/EVA1B/EIF4EBP1/TRIP10
KINSEY_TARGETS_OF_EWSR1_FLII_FUSION_DN	KINSEY_TARGETS_OF_EWSR1_FLII_FUSION_DN	308	0.311087	1.36468	0.0108603	tags=20%, list=15%, signal=17%	IER3/CSRNP1/HES1/ADM/CCN1/BCL9L/YPEL2/MAGED1/FLNB/NCOR2/GEM/ITM2C/METRNL/COL3A1/FAM214B/ZYX/NLRP1/TSPYL2/RGS3/MAP2K5/TP53INP1/SMOX/ZFYVE1/AP5Z1/TNC/LDOC1/IER5L/BAIAP2/TANC2/CHPF/SGSH/GAB2/SIPA1L2/DPP7/G6PC3/PLEKHJ1/KIF26B/SPTAN1/AKIRIN2/IGF2BP2/MAP1LC3B/NYNRIN/FNDC3B/KLF2/PPP1R9A/EFNA1/DOK4/AJUBA/MAP1LC3A/CST3/PXDC1/UBE2H/ATOH8/DKK1/RETREG2/C11orf96/MXD1/TIMP2/FRMD6/FN1/RBMS3/SEZ6L2
RASHI_RESPONSE_TO_IONIZING_RADIATION_5	RASHI_RESPONSE_TO_IONIZING_RADIATION_5	124	0.345032	1.3628	0.0261968	tags=31%, list=19%, signal=25%	GSTM1/NFIX/ADORA2A/DEAF1/SERPINE1/NACC2/ATN1/GAS7/CYTH3/PIK3R1/DNAJC5/USP7/MAP3K4/FRAT1/TMEM170A/TMEM229B/LLGL2/TDO2/DNMT3A/RCC1/F7/R3HDM1/CSNK2A1/FAM53A/TCF20/VHL/SH3BP5/CHTF8/DAB2IP/COL13A1/PREPL/PAX1/SH3GL3/LARP7/RAP2B/CNOT6L/DDX41/COL14A1
YAGI_AML_WITH_11Q23_REARRANGED	YAGI_AML_WITH_11Q23_REARRANGED	328	0.30759	1.36178	0.00516239	tags=24%, list=17%, signal=20%	NFIX/SLF2/RGS19/SF1/CLDND1/ATM/RBPMS/PHF2/MLF2/NFATC3/ACTA1/TWF2/ATP1B1/DGKD/CS/SAMD4A/FBXO46/SMC1A/GAS7/COL6A2/CADM1/PPT2/PPP1CA/MYH9/TNPO1/WARS1/MMP17/RGS10/TMC6/GLUL/GRIK2/GPS2/BCL2/GGT1/SUPT5H/VPS13D/ST3GAL6/AK4/UBN1/PRDM2/TEKT2/KHK/PTP4A3/PIK3CD/SMPDL3B/TPD52L2/ATXN1/EIF4EBP2/ANGEL1/ADCY9/TEX30/FAM169A/IL9R/IMPG1/GPM6A/ITM2A/NCOA6/NTRK1/GRK4/TSPAN4/PYGM/DDAH2/CYP4F12/PIM1/PRKAG1/PRKCB/PCYT1B…
PUJANA_BREAST_CANCER_LIT_INT_NETWORK	PUJANA_BREAST_CANCER_LIT_INT_NETWORK	98	0.358042	1.36117	0.0475436	tags=34%, list=22%, signal=26%	JUNB/NFKBIA/ATM/TERF2/NELFB/SMC1A/MYC/EP300/SMAD3/BACH1/FANCA/LMO4/H2AX/FHL2/RFC1/STAT5A/NPM1/AKT1/TERF1/CSNK2A1/ATR/RBBP8/MAP2K3/CCNA2/RAD9A/CDC25A/ATF1/AURKA/MSH2/MCM3/RAD51/RAD50/CCNE1
PASQUALUCCI_LYMPHOMA_BY_GC_STAGE_UP	PASQUALUCCI_LYMPHOMA_BY_GC_STAGE_UP	265	0.314145	1.36003	0.0116723	tags=20%, list=13%, signal=18%	CSRNP1/CORO2B/CTSZ/PHLDA1/ATP6V0C/MT1A/PYCR1/MAGED1/RAB3D/CDV3/MT1X/SKIL/HM13/BTG2/EYA4/IRF6/NFIL3/RGS3/TP53INP1/CLPTM1L/CDK18/CLVS1/DLL3/TANC2/SYDE2/DUSP14/SLAMF9/EPCAM/FADS2/CKAP4/BHLHA15/TMED9/TSPAN13/SURF4/TERT/SEC24D/FBXO17/CCN4/TGM2/GLS2/ATP2B4/SMPDL3B/HIPK1/EDEM1/IGF1R/SRP54/FNDC3B/LAPTM4B/HID1/RRBP1/GPM6A/CDC42BPB/LPIN2/SLC46A1
SENESE_HDAC1_TARGETS_UP	SENESE_HDAC1_TARGETS_UP	415	0.301152	1.35894	0.00350588	tags=21%, list=16%, signal=18%	CXCL8/SLCO4A1/NAV3/KISS1/PPIF/SMG7/DUSP5/NFKBIA/OGDH/KLHL21/HMGA1/SLC43A3/OTUD4/ARHGDIA/TRIO/NFKB2/TMEM259/PIP5K1A/STIP1/GEM/PIK3C2A/SUPT6H/CDV3/MLX/MCM4/FOSL1/SCG5/TMOD3/LETM2/SPAG1/PLEC/CYTH3/CBFB/ABCC9/MYC/ERRFI1/MTAP/AKT1S1/EIF4G1/MTMR2/HSP90AB1/LSM12/ITPRIP/HECTD1/CYP1A1/LTB/BACH1/PRDM2/TNFRSF10B/ZC3H12A/BCL2L1/TGM2/CSGALNACT2/AHCTF1/DESI1/ST6GALNAC4/FAS/AADAC/GCH1/AKIRIN2/IGF2BP2/TRUB1/TFE3…
GOTZMANN_EPITHELIAL_TO_MESENCHYMAL_TRANSITION_DN	GOTZMANN_EPITHELIAL_TO_MESENCHYMAL_TRANSITION_DN	199	0.322591	1.35742	0.0238749	tags=23%, list=18%, signal=19%	EGR1/FOS/CXCL2/IER2/GSTM1/NFKBIA/BAX/UCP2/STIP1/SOS1/ARF4/FOSL1/HELLS/SDC4/HLA-A/MYC/AMD1/KCNAB1/AP2A2/PA2G4/PFN1/NPEPPS/STK3/SRSF1/MRC1/TOB1/BNC1/POLR2C/CCT3/HCCS/PFKL/RALY/UBE2H/SOD1/AHCY/WT1/TLE1/TM4SF1/YWHAZ/DBP/LGALS9/MAPK14/BCAP31/UGT1A10/SLC35A1/ITGB4
BLUM_RESPONSE_TO_SALIRASIB_UP	BLUM_RESPONSE_TO_SALIRASIB_UP	236	0.314784	1.35367	0.0134977	tags=17%, list=12%, signal=15%	EGR1/ATF3/IL6/MAFG/PPP1R15A/NFKBIA/GFPT1/STX5/PKD1/ZYX/ARF4/HYOU1/FOSL1/DDX10/CBX4/WARS1/ARHGEF2/TESK1/CSNK1G1/KLF11/ENTPD6/NDEL1/SLC35A2/EIF5/SEC63/BACH1/GADD45A/CLASRP/EIF1/KPNA5/TNFRSF10B/ROBO3/BCL2L1/NGF/GOLGA4/SGPL1/MAP1LC3B/COX7A2L/SCAMP2/MYO5A/DPAGT1
REACTOME_REGULATION_OF_INSULIN_LIKE_GROWTH_FACTOR_IGF_TRANSPORT_AND_UPTAKE_BY_INSULIN_LIKE_GROWTH_FACTOR_BINDING_PROTEINS_IGFBPS	REACTOME_REGULATION_OF_INSULIN_LIKE_GROWTH_FACTOR_IGF_TRANSPORT_AND_UPTAKE_BY_INSULIN_LIKE_GROWTH_FACTOR_BINDING_PROTEINS_IGFBPS	117	0.344374	1.35355	0.0407855	tags=27%, list=17%, signal=23%	IL6/CCN1/PNPLA2/IGFBP4/CSF1/MEN1/VWA1/FAM20C/TNC/GAS6/TMEM132A/CKAP4/PRKCSH/APP/FGG/FSTL3/C4A/F2/CST3/LAMB1/MEPE/FGA/IGFBP2/FN1/CHGB/SHISA5/NUCB1/PDIA6/MELTF/MIA3/BMP4/PAPPA
ACEVEDO_LIVER_CANCER_WITH_H3K9ME3_DN	ACEVEDO_LIVER_CANCER_WITH_H3K9ME3_DN	107	0.348272	1.34967	0.0491551	tags=24%, list=19%, signal=20%	CEP112/GFPT1/LCT/H2BC11/SCG5/BTBD7/KLHDC1/H2AC16/SLC26A8/AHCYL2/MMS22L/TRAPPC9/TUBB4B/CFH/VSX2/HOXA7/ANKRD36/PTPDC1/CEP350/DGKH/NECAP1/ZIC2/H4C1/NUSAP1/UTP20/H4C6
REACTOME_DEGRADATION_OF_THE_EXTRACELLULAR_MATRIX	REACTOME_DEGRADATION_OF_THE_EXTRACELLULAR_MATRIX	131	0.338644	1.34935	0.0325136	tags=24%, list=17%, signal=20%	CTRB2/ADAMTS1/BSG/FURIN/MMP14/COL3A1/CAPN15/BMP1/COL6A2/MMP24/MMP17/COL9A2/CAPN8/COL26A1/ADAM8/CTSK/CAPN10/COL6A1/CAPNS1/COL12A1/FBN3/LAMB1/SCUBE1/CAPN6/TIMP2/FN1/CD44/TLL1/COL1A2/MMP20/COL13A1
REACTOME_RHO_GTPASE_CYCLE	REACTOME_RHO_GTPASE_CYCLE	427	0.298244	1.34888	0.00708237	tags=22%, list=16%, signal=19%	VANGL2/LETM1/ARHGAP44/KCTD13/EPHA2/AKAP13/PKN1/ARAP2/ARHGEF1/GRB7/CAPZB/ARHGDIA/ARHGEF11/TRIO/ARHGEF6/STIP1/SH3BP1/STX5/VAV3/SOS1/GOPC/C1QBP/GIT1/VAV2/PCDH7/ARHGAP17/TMOD3/LCK/CPSF7/RASAL2/ITSN1/WIPF2/STK38/PIK3R1/NET1/MYO9B/WDR81/PAK4/ARHGEF2/BAIAP2/ARFGAP3/HSP90AA1/HSP90AB1/SYDE2/RHOG/GOLGA3/ARHGAP12/CKAP4/OPHN1/RHOU/ARHGAP31/ARHGEF39/ANKLE2/KIDINS220/PICALM/ARHGAP25/OBSCN/PKN3/JUP/SHKBP1/FAM13…
RUTELLA_RESPONSE_TO_HGF_DN	RUTELLA_RESPONSE_TO_HGF_DN	228	0.314615	1.34748	0.0157757	tags=21%, list=15%, signal=18%	EGR1/DUSP6/HBEGF/ZFP36/KLF10/TSEN34/CSNK1E/ARHGEF6/CD52/MPRIP/CALML4/NCOA1/CNPY3/NET1/MARCKSL1/ZDHHC18/RAP1GAP2/SMAD3/GAS6/WNT5B/RERE/ADAM8/CCNL1/CYTH1/TRADD/CELF2/TRAF5/CCNG2/DDIT4/PTP4A3/RSAD2/GRPEL1/ICAM3/NFATC2IP/SLC7A7/SETD1B/TYMP/FBXL5/NEK3/RPL22/HOMER2/LMNB1/MCL1/MS4A6A/ITPK1/RABGAP1/PRKCB/TTN/SH3BP5
OISHI_CHOLANGIOMA_STEM_CELL_LIKE_DN	OISHI_CHOLANGIOMA_STEM_CELL_LIKE_DN	265	0.311156	1.34709	0.0145142	tags=22%, list=17%, signal=19%	EPHA2/TSEN34/MT2A/RNF19B/MMP14/NCOR2/GEM/COL3A1/MYL9/TWF2/FAM214B/SIPA1/MT1X/BMP1/PLTP/ARHGAP17/PTK2B/LCK/EMP3/COL6A2/SV2A/PEX14/NET1/MARCKSL1/DVL1/TMC6/CHPF/ADAM8/PEG10/DGKA/LTBP4/RAPGEFL1/TSPAN13/TPM2/BACH1/ATP2A3/DDIT4/SEC24D/MUC5B/IRF2/SMPDL3B/RHOF/IGF2BP2/GAS1/LSP1/ARRB1/MAP3K5/DKK1/HK2/NPDC1/CEP170B/CYP4F12/MT1G/PACRG/TRAM2/MFAP2/NUCB2/SORD/SDF4
WP_EBOLA_VIRUS_PATHWAY_ON_HOST	WP_EBOLA_VIRUS_PATHWAY_ON_HOST	123	0.340633	1.34673	0.0438066	tags=27%, list=17%, signal=22%	CLTCL1/TIMD4/VPS18/NFKB2/FLNB/VPS4A/C1QBP/SOCS3/VAV2/KPNA1/HLA-A/PIK3R1/EP300/GAS6/HLA-DRB1/ITGA3/PIK3CD/HLA-C/RFC1/IGF1R/HLA-B/ICAM3/AKT1/PIK3R3/RAB9A/MERTK/CAV1/AXL/TYRO3/DAB2IP/DDX58/CLEC10A/HLA-DQA1
WP_INTEGRATED_BREAST_CANCER_PATHWAY	WP_INTEGRATED_BREAST_CANCER_PATHWAY	145	0.332718	1.34573	0.0227663	tags=31%, list=22%, signal=24%	JUN/BAX/SMAD7/ATM/TSC1/ALKBH1/FOSL1/MYC/EP300/IRS1/PIAS1/BCL2/GDI1/TRADD/TAB1/BACH1/GADD45A/BMPR2/CERK/MYCBP2/TSC2/EDAR/CSNK1D/NF1/HIPK2/AKT1/STK11/ATR/RHEB/PML/BAK1/CASP9/ITPKC/CDC25A/ATF1/SMAD2/AURKA/MAP3K7CL/MSH2/EGFR/RALGAPA1/RAD51/MAPK1/RAD50/MAX
ONDER_CDH1_TARGETS_1_UP	ONDER_CDH1_TARGETS_1_UP	131	0.33756	1.34502	0.0338971	tags=34%, list=19%, signal=27%	ATF3/GDF15/GFPT1/EPHX1/N4BP2L2/MAGED1/CALML4/DLGAP4/GID4/ABHD4/BTG2/CTTN/PIDD1/FAM117A/LRP5/KHNYN/SEMA3F/BCL6/PNRC1/C1QL1/GPC1/LTB/CYP4F11/SEC24D/TMEM214/PRKAG2/CD70/PDE4DIP/TSC22D3/SLC39A7/OBSL1/RRNAD1/IGFBP2/CD44/GOLGA2/SENP6/DBP/CSRP2/CHAC1/CRIP2/GABARAPL1/HERC1/EML2/CELSR2
ZHOU_INFLAMMATORY_RESPONSE_LPS_UP	ZHOU_INFLAMMATORY_RESPONSE_LPS_UP	349	0.301985	1.34467	0.0108682	tags=20%, list=19%, signal=16%	CXCL2/TNF/IER3/IL6/CSRNP1/ADM/PPP1R15A/DUSP5/CGAS/CXCL1/RNF19B/N4BP2L2/NFKB2/TNFSF9/SERPINE1/SPSB1/EDN1/SRC/B4GALT1/IL1B/FOSL1/BTG2/IRF6/SDC4/CCL4/ACOT6/CREB5/KIF1B/TBX20/ARHGAP31/TTC9/ZC3H12A/BCL2L1/NEXN/NIPAL4/STAT5A/BRICD5/CFAP65/NETO1/MCF2L/GPR135/TLR7/C11orf96/MAP2K3/IFIT3/SEMA6C/CD44/TRIM36/WTAP/ZC3HAV1/ADORA2A-AS1/FCRL5/MBD3L2/PML/DDX58/PYY/KRTAP2-2/LIMK2/PXDN/JRK/JAG1/TRIP10/DDX6/OSM/LEF1…
SHETH_LIVER_CANCER_VS_TXNIP_LOSS_PAM1	SHETH_LIVER_CANCER_VS_TXNIP_LOSS_PAM1	244	0.312339	1.3435	0.0136862	tags=18%, list=11%, signal=17%	HES1/BICD1/CTPS1/CHKA/CDK5R2/PYCR1/ITM2C/COL3A1/TWF2/EHMT2/LSS/SLC48A1/PLA1A/LIMK1/PTPRE/KLF6/UBE2S/MTAP/RELL1/KIF11/ARF3/MTMR2/SNX30/KCTD17/CKAP4/DPP7/SH3BGRL3/SEMA4B/CD34/PDLIM7/SCARB1/AGFG1/DDIT4/VASN/ITGA3/TGM2/SLC6A8/JPT1/TFF2/SCN1B/HIPK1/PHIP/TUBB4B/SFXN4/ACOT9
REACTOME_SUMOYLATION	REACTOME_SUMOYLATION	173	0.323705	1.34318	0.0265699	tags=25%, list=17%, signal=21%	TRIM28/NFKBIA/RNF168/HDAC7/NFKB2/SENP2/NUP188/MTA1/NCOR2/NCOA1/SMC1A/CBX4/FOXL2/EP300/PPARA/PIAS1/NUP153/SENP5/SCMH1/PHC3/SMC3/DNMT3A/CDCA8/CBX8/EID3/SEH1L/NR3C2/TDG/RXRA/DNMT3B/NPM1/NOP58/HIPK2/DDX17/PHC1/VHL/SMC5/SUMO3/SEC13/HIC1/H4C1/ING2/SATB2/PML
LINDGREN_BLADDER_CANCER_CLUSTER_2B	LINDGREN_BLADDER_CANCER_CLUSTER_2B	366	0.300234	1.34141	0.00701772	tags=22%, list=18%, signal=18%	EGR1/JUN/IER2/CCN1/SPRY1/DUSP5/NFKBIA/ETV1/SLC43A3/MT2A/ADORA2A/CD52/GEM/MT1H/MYL9/SOCS3/NUMA1/MT1X/PCDH7/MT1E/LCK/EMP3/COL6A2/CSRP1/MSN/NFIL3/MAPK7/PITX2/RELL1/PCOLCE/TNC/RGS10/SREBF1/WHRN/STMN3/CNRIP1/PRKCH/TPM2/CELF2/HLA-DRB1/EVI2B/RPS19BP1/IL32/PIK3CD/CALM1/PPP1R18/SERPING1/CERK/RNF41/PNOC/PIM2/COL6A1/MYADM/C4A/ZNF738/MYO5A/TSC22D3/ITM2A/RNASE6/ARHGAP30/BIRC3/PTPN7/TIMP2/RBP5/TTN/MT1G/CAV1/CO…
REACTOME_ASPARAGINE_N_LINKED_GLYCOSYLATION	REACTOME_ASPARAGINE_N_LINKED_GLYCOSYLATION	289	0.307771	1.34084	0.0147172	tags=23%, list=17%, signal=19%	SYVN1/CTSZ/PPP6R3/GFPT1/CAPZB/SPTBN4/STX5/MVD/ST3GAL4/GBF1/B4GALT1/SEC24C/ARFGAP1/ARF4/TUBA3E/TUBA1A/TRAPPC10/ARF5/DYNC1H1/BET1L/AMDHD2/ST6GALNAC6/STX17/ARF3/ARFGAP3/DCTN1/MAN1C1/TRIM13/SEC31A/ST3GAL6/TMED9/SEC24D/PRKCSH/RAB1B/SPTAN1/ST6GALNAC4/ST6GAL2/TRAPPC9/TUBA3D/ALG8/EDEM1/SLC35C1/TUBB4B/TUBB4A/NUS1/MLEC/CSNK1D/MOGS/DPAGT1/ST3GAL5/B4GALT3/RNF5/COG7/EDEM3/DYNC1LI1/SEC22C/COPZ1/CMAS/SEC13/MIA3…
NIKOLSKY_BREAST_CANCER_11Q12_Q14_AMPLICON	NIKOLSKY_BREAST_CANCER_11Q12_Q14_AMPLICON	148	0.328128	1.33694	0.0371471	tags=28%, list=20%, signal=23%	RCE1/PPP6R3/CLCF1/KLC2/CPSF7/CTTN/PPP1CA/CDK2AP2/TMEM132A/SERPINH1/GAB2/CARNS1/CORO1B/EED/PICALM/ACY3/PPME1/RIN1/TMEM134/RAB1B/ALG8/CCDC81/CABP2/ARRB1/DDB1/BRMS1/GDPD5/RSF1/KRTAP5-10/NDUFV1/DPP3/MRGPRF/RAD9A/CHRDL2/PITPNM1/TMEM109/CTSF/CREBZF/CNIH2/AIP/OMP/ANKRD13D
FIRESTEIN_PROLIFERATION	FIRESTEIN_PROLIFERATION	160	0.324765	1.33609	0.0398428	tags=26%, list=18%, signal=22%	NUAK2/PKN1/CSNK1E/TRIO/SIK1/PKM/CPNE1/LIMK1/PIK3R1/EP300/ARHGEF2/PPARA/PRKD2/EPHB2/FIGN/DMPK/CAMK4/STK3/PACSIN2/STK32C/CERK/ADK/TERF2IP/DKC1/NF1/NRBP1/PRKAR1B/HIPK2/PIK3R3/TSKS/NTRK1/GRK4/GMIP/ATR/STK32A/MERTK/TRIB1/AXL/LIMK2/TAOK1/SPEG/GRK6
REACTOME_DISEASES_OF_SIGNAL_TRANSDUCTION_BY_GROWTH_FACTOR_RECEPTORS_AND_SECOND_MESSENGERS	REACTOME_DISEASES_OF_SIGNAL_TRANSDUCTION_BY_GROWTH_FACTOR_RECEPTORS_AND_SECOND_MESSENGERS	374	0.297833	1.33558	0.00810548	tags=23%, list=16%, signal=19%	DUSP6/HBEGF/HES1/SYVN1/HDAC7/MAP2K2/MIB2/NCOR2/JAG2/MPRIP/SOS1/SRC/DUSP10/TBL1XR1/CBL/FKBP1A/PEBP1/LCK/PPP2R5D/GTF2F2/KREMEN2/PIK3R1/MYC/LRP5/AKT1S1/EP300/IRS1/ARRB2/SMAD3/FZD5/HSP90AA1/RHOG/GAB2/PRR5/STAT5B/AGTRAP/CAMK2G/KANK1/GAB1/POLR2J/BCL2L1/PIK3CD/CALM1/GRB2/GOLGA4/SHOC2/FGG/PPP2CA/STAT5A/TSC2/KDM7A/FGF6/NF1/APBB1IP/DUSP8/POLR2C/AKT1/PPP2R1A/PSMA8/NCBP2/ARRB1/PSEN2/FGF20/PIK3R3/GSK3B/HDAC8/…
PECE_MAMMARY_STEM_CELL_DN	PECE_MAMMARY_STEM_CELL_DN	130	0.336552	1.33538	0.0402477	tags=34%, list=23%, signal=26%	CTSZ/TRIO/MMP14/SCAF4/PUM2/ZDHHC6/NCBP3/EPB41L3/CNOT8/ARHGEF2/SLC24A2/CCNL1/SEC63/UBE2K/NPEPPS/SQLE/CALM1/APP/MAP1LC3B/COL6A1/KDM7A/GNG2/KLF12/RASA1/NEMF/DCTD/FN1/RNF146/TNRC6A/PCDH18/TRIM27/JAG1/SNED1/SLC7A6/POMK/ARHGAP32/PARP8/NREP/RGS17/GLUD1/RUSC1/RO60/NASP/RAB2B
RIGGI_EWING_SARCOMA_PROGENITOR_UP	RIGGI_EWING_SARCOMA_PROGENITOR_UP	403	0.29568	1.33333	0.0108071	tags=25%, list=20%, signal=21%	FOS/DUSP6/GDF15/HBEGF/HES1/CEP112/DUSP5/SULT1A2/ARHGEF6/JAG2/NFATC3/DGKD/ZNF703/TOX2/PCDH7/KDSR/KASH5/PLA1A/BTG2/CYYR1/OLFM3/COLGALT2/CSPG5/PIK3R1/LIN7B/MARCKSL1/SLAIN1/TNC/GRIK2/PAQR5/GFRA2/STMN3/CHCHD10/LRP8/ATP1A1/RBM24/TDO2/TSPAN13/TRHDE/LMO4/SLC35F2/HSPB2/PDLIM1/HS6ST1/ATG16L1/PRR5L/GCH1/PNOC/SEC14L1/NR3C2/FLRT3/PAG1/CRYGS/PCDH9/OLFML3/PTGER3/ACACB/S1PR3/ZC3H13/SLC5A6/MAP3K5/GYG2/ITM2A/KRT17…
RIZKI_TUMOR_INVASIVENESS_3D_UP	RIZKI_TUMOR_INVASIVENESS_3D_UP	204	0.314608	1.32997	0.0400494	tags=21%, list=14%, signal=18%	JUN/CXCL8/ATP2A2/SOD3/CDK5R2/CASC3/COL3A1/WIF1/TAP2/TAOK2/FAM189A2/POLE/CSF1/SLC23A2/DNM2/SEMA3F/MMP17/TNC/DCTN1/ETV4/PIP4K2A/DHRS9/RPH3AL/RNF4/LLGL2/RFX3/UBN1/RCC1/ADRA2C/S1PR1/TAC1/GRB2/MT3/IGF1R/AADAC/AKAP5/TLX2/HLTF/RREB1/RUNX1T1/TIMM17A/DCAF7/TMEFF2
ZHONG_RESPONSE_TO_AZACITIDINE_AND_TSA_UP	ZHONG_RESPONSE_TO_AZACITIDINE_AND_TSA_UP	174	0.320386	1.32789	0.043788	tags=24%, list=17%, signal=20%	JUN/ATF3/AKAP17A/ASB6/TRIO/ARF4/SKIL/SEC61A2/MPZL1/TEF/PMEPA1/ENO2/REPS2/SENP5/CYP26A1/DUSP14/GAB2/CT55/TNNC2/CDKN2D/PIK3CD/SLC6A8/JPT1/BMPR2/ILRUN/GCH1/MAP1LC3B/PARP12/MLEC/KLF12/HSPA2/MAP2K3/TIMP2/COL1A2/MICB/HSD17B1/TYRO3/LAT2/CSRP2/MAGEC1/TUBA3C
LINDGREN_BLADDER_CANCER_CLUSTER_1_DN	LINDGREN_BLADDER_CANCER_CLUSTER_1_DN	365	0.297132	1.32745	0.0102006	tags=22%, list=16%, signal=19%	IER2/CCN1/TAGLN2/SLC43A3/CTPS1/CXCL1/C2CD2L/EPHX1/MNS1/NFKB2/PHF2/PYCR1/GEM/MYL9/DEDD/ZNF703/MOB2/DLGAP4/TACC3/NDRG2/TUBA1A/IL17RB/SLC26A6/POLE/GSTM4/PITX2/KIFC1/TRIM11/RELL1/ENO2/KIF11/ARRB2/TNC/ZDHHC18/RGS10/MAN1C1/SBNO2/PRG2/NECTIN2/MCM5/KIF23/APIP/ATG9B/STAT5B/PLCXD1/DYRK2/SQLE/CAMK2G/VASN/IL32/CDCA8/JPT1/MINK1/GSTM2/RCBTB1/TEX30/PATL1/EFNA1/H1-0/ICAM3/CDCP2/ITGB7/WDHD1/PRC1/PRUNE1/RUBCN/SLC4…
RICKMAN_TUMOR_DIFFERENTIATED_WELL_VS_POORLY_DN	RICKMAN_TUMOR_DIFFERENTIATED_WELL_VS_POORLY_DN	355	0.297986	1.32676	0.0125975	tags=24%, list=17%, signal=20%	HBEGF/ADM/NACC1/IFFO2/KLF10/BSG/CSNK1E/RAB3D/METRNL/SFN/DAPK3/ARF4/PGGT1B/DLGAP4/PCDH7/BMP1/CCDC85C/IGFL2/SMTN/UBAP1/GAS2L1/KLF6/PLBD2/ADAM12/MICALL1/DCUN1D3/TANC2/NUMB/IL20RB/DUSP14/TP63/LRRC8E/SLAMF9/CLIP1/NDEL1/PPP1R1C/SEMA4B/ITPRIP/BACH1/SPRR1B/NPEPPS/JUP/CALM1/JPT1/LCE3D/NIPAL4/GIPC1/DESI1/IMPDH1/GRHL3/MRC1/CNGB1/CDCP1/SNX33/YIPF5/BNC1/PLEKHM1/ANKRD9/ILVBL/MAFK/MYO5A/MCOLN1/OSBPL10/IPPK/KRT1…
REACTOME_RHOA_GTPASE_CYCLE	REACTOME_RHOA_GTPASE_CYCLE	144	0.326121	1.32136	0.0460624	tags=25%, list=17%, signal=21%	ARHGAP44/AKAP13/PKN1/ARAP2/ARHGEF1/ARHGDIA/ARHGEF11/TRIO/STX5/VAV3/C1QBP/VAV2/PCDH7/PIK3R1/NET1/MYO9B/ARHGEF2/OPHN1/ARHGAP31/OBSCN/PKN3/JUP/ARHGAP23/ARHGAP11A/PREX2/MCF2L/GMIP/ARHGAP30/ARHGAP6/MCF2/CAV1/ARHGEF5/FARP1/ACTC1/MYO9A/BCAP31
KEGG_PATHWAYS_IN_CANCER	KEGG_PATHWAYS_IN_CANCER	308	0.300852	1.31978	0.017965	tags=19%, list=15%, signal=17%	FOS/JUN/CXCL8/IL6/NFKBIA/BAX/MAP2K2/NFKB2/SOS1/DAPK3/CBL/RASSF1/PAX8/TRAF2/PIK3R1/MYC/EP300/DVL1/PIAS1/SMAD3/FZD5/WNT5B/HSP90AA1/SUFU/BCL2/HSP90AB1/VEGFB/STAT5B/TRAF3/TRAF5/JUP/ITGA3/BCL2L1/PIK3CD/DVL3/WNT9B/GRB2/FAS/IGF1R/WNT10A/STAT5A/RXRA/WNT4/FGF6/AKT1/FGF20/PIK3R3/GSK3B/LAMB1/RUNX1T1/NTRK1/PDGFB/BIRC3/ARNT/VHL/TCF7L1/FN1/CRKL/PRKCB
HOSHIDA_LIVER_CANCER_SUBCLASS_S1	HOSHIDA_LIVER_CANCER_SUBCLASS_S1	227	0.307575	1.31847	0.0312435	tags=22%, list=16%, signal=19%	IER3/CCN1/DUSP5/PKN1/CXCL1/FBRS/GEM/GNAI2/COL3A1/COL6A2/ARF5/CBFB/MSN/STK38/DNM2/PKMYT1/LTF/PRKD2/LHFPL2/ADAM8/DGKA/ACP5/PFN1/CORO1A/RIT1/TPM2/CELF2/TRAF3/TRAF5/LMO4/RCC1/DDX11/FCGBP/MYCBP2/PIM2/COL6A1/ATP6V1B2/LSP1/ATP6V0B/CCL5/LAMB1/KLC1/PLD3/RNASE6/HK1/AP2S1/TIMP2/FCGR2A/COL1A2/TFF3
GAUSSMANN_MLL_AF4_FUSION_TARGETS_A_UP	GAUSSMANN_MLL_AF4_FUSION_TARGETS_A_UP	183	0.315824	1.3169	0.0342971	tags=21%, list=14%, signal=18%	EGR1/HBEGF/NAV3/CCN1/SLC43A3/AKAP17A/PFKFB2/SYT12/BTBD7/CAMK1D/CLSTN1/PITX2/MYH9/SBNO2/CNRIP1/TPGS2/WAC/KDM5C/ST3GAL6/TTC9/TNFAIP8/ADAL/TGM2/NR2C2/HUWE1/ATP6V1B2/KAT7/S1PR3/HOXA7/CHD8/MYO5A/CCT3/TCAF1/THOC1/SPDYA/PRTG/USP14/LHX9/PAK5
LI_INDUCED_T_TO_NATURAL_KILLER_UP	LI_INDUCED_T_TO_NATURAL_KILLER_UP	293	0.301877	1.31664	0.0157535	tags=12%, list=8%, signal=11%	EGR1/TNF/IER3/JUNB/BHLHE40/DUSP6/DUSP5/SERTAD1/RNF19B/CAPZB/MT1A/CLDND1/PTMS/FURIN/CD52/RAB3D/UAP1L1/PLTP/SMAGP/ARSB/NFIL3/LY6H/ERRFI1/KHNYN/SELENOS/PIM3/HAAO/SH3BGRL3/GPC1/ST3GAL6/PRR7/PDLIM7/DHRS11/TNFRSF18
KYNG_DNA_DAMAGE_UP	KYNG_DNA_DAMAGE_UP	189	0.314132	1.31515	0.0405934	tags=22%, list=15%, signal=19%	HBEGF/DUSP5/PHLDA1/RNF168/SOX9/MTA1/HELZ/ADAM12/KIFC1/FBLN1/HNMT/PRG2/CACNA1I/NDEL1/MYO5B/PFN1/STAT5B/HNRNPD/FOLH1/DIS3/RAB1B/LRRFIP2/SGPL1/HSF2/ATP6V0B/PDE4DIP/GYPB/ELF4/PLCL1/RAB9A/USP1/INSL4/THOC1/POLR2A/EML4/NCOR1/ARNT/DSC2/GGA3/DCTD/RPS6KA3/AHCY
MUELLER_PLURINET	MUELLER_PLURINET	286	0.301387	1.31033	0.0248864	tags=34%, list=23%, signal=27%	TRIM28/NACC1/HMGA1/PASK/GRB7/STIP1/RBPMS/ACTA1/RECQL4/MCM4/SSB/LCK/MATK/POP1/TPX2/SNRPB/TGIF1/RMND5B/FEN1/MYC/NUP153/LSM4/BCL2/HSP90AB1/PA2G4/MCM5/MCM2/SLC19A1/PFN1/NPPB/PNN/GADD45A/SRSF1/DDX11/LUC7L3/GNL3/SET/EXOSC9/STXBP2/DSCC1/ARMC6/NFKBIB/DCTPP1/ANAPC1/NOP56/U2AF1/POLR1C/DNMT3B/KAT7/NPM1/NOP58/ORC6/NCL/MYBBP1A/PFDN6/GAR1/EPPK1/HSPA2/PHC1/GDF9/CCNA2/GEMIN2/PCYT1B/MT1G/PPM1B/MBD2/RAD9A/PMF1/BAK…
REACTOME_G_ALPHA_Q_SIGNALLING_EVENTS	REACTOME_G_ALPHA_Q_SIGNALLING_EVENTS	205	0.309167	1.3077	0.0384615	tags=28%, list=24%, signal=22%	HBEGF/KISS1/RGS19/TRIO/ABHD12/EDN1/SOS1/DGKD/TACR3/RGS3/PIK3R1/MAPK7/P2RY6/DGKA/TAC3/PRKCH/TAC1/GRB2/GPR132/APP/CHRM3/GNG8/PROK2/GNG2/GRPR/GNRH1/F2/PIK3R3/RPS6KA2/DGKH/P2RY1/RPS6KA3/BDKRB2/CHRM1/LPAR1/HCRTR2/P2RY2/HCRTR1/HRH1/GPR4/OXT/NMU/DGKE/NMS/MCHR2/GAST/EGFR/RGS17/KALRN/MAPK1/NPSR1/CYSLTR1/PRKCD/EDN2/PROKR2/ITPR1/ARHGEF25/PIK3CA
CHANDRAN_METASTASIS_UP	CHANDRAN_METASTASIS_UP	193	0.311246	1.30639	0.0357143	tags=27%, list=17%, signal=23%	UBE2O/SULT1A2/TRIO/FOXM1/KMT2C/UBE2Z/ZBTB7A/TPX2/CBX4/DYNC1H1/KMT2E/KANSL1/CDK18/FBXO45/WNK1/BCL2/RNF216P1/LONRF2/AK4/FOLH1/EIF5/CHORDC1/DDIT4/CDKN2D/HS6ST1/JPT1/GRB2/NGF/BPTF/PCBP2/GPATCH2L/FNBP4/BRICD5/NFATC2IP/DUSP8/ORC6/TERF1/GSK3B/LARP1/DDX17/PRAP1/POLR2A/DCAF7/EML4/CSNK1G2/AGO4/FN1/DXO/HMBOX1/ENTR1/MTF2/TYRO3
MOOTHA_PGC	MOOTHA_PGC	405	0.288959	1.30279	0.0157531	tags=19%, list=15%, signal=16%	FOS/DUSP1/DUSP6/GDF15/SOD3/PHLDA1/NFIX/SF1/MT2A/BSG/FBRS/FXR2/JMJD6/FOXM1/ATN1/PKM/SRC/TWF2/ATP1B1/FAM214B/CS/SGTA/NDRG2/TINAGL1/LRP5L/SAC3D1/NFYC/PTGES2/LRP5/PCOLCE/CDK18/RTN4/LATS1/TLE5/HADHB/ATP1A1/KIDINS220/HSPBP1/NPPB/CAB39/ATP2A3/DDIT4/ABCA2/PTCD3/CDKN2D/SCN1B/ST6GALNAC4/PUS1/LRRFIP2/MRPS2/STARD7/GCH1/TPI1/CDC34/SH3BGR/TSC2/GRPEL1/MRPS18B/GOLPH3/HCCS/TYMP/ANKRD40/NDUFV2/RNF5/TIMM17A/PTDSS2/…
WANG_SMARCE1_TARGETS_DN	WANG_SMARCE1_TARGETS_DN	353	0.291652	1.29869	0.0210565	tags=21%, list=17%, signal=18%	CXCL2/CXCL8/DUSP6/GDF15/SLCO4A1/PPIF/ADAMTS1/HMGA1/EPHA2/CTPS1/CXCL1/TIAL1/LY6E/SLC29A1/SRM/C1QBP/SCML1/TAP2/CYYR1/PLK2/SAC3D1/ADAM12/MTAP/DVL1/WNT5B/MEF2A/SMS/FADS2/APIP/SMC3/UBE2V2/HNRNPD/PRR7/TSPAN13/ETV3/PNN/TRPC4/TBRG4/DRAP1/TGM2/GNL3/USP6/SHOC2/CDCP1/TEX30/PARP12/ACOT9/POLR3G/HLA-B/GRPEL1/CD70/HAUS6/PDE4DIP/SHTN1/HCCS/RASA1/NDUFV2/RAB9A/GAR1/DUSP7/HK2/FIP1L1/SORBS2/GLRX2/BDKRB2/CAV1/TRIB1/P…
MONNIER_POSTRADIATION_TUMOR_ESCAPE_DN	MONNIER_POSTRADIATION_TUMOR_ESCAPE_DN	357	0.290539	1.29721	0.0167197	tags=11%, list=7%, signal=10%	EGR1/FOS/JUN/BHLHE40/DUSP6/PPP1R15A/IER2/CCN1/SERTAD1/KLF10/SMAD7/MIIP/C16orf54/GPR19/S100A16/RNF217/LSS/TBC1D8B/SKIL/KMT2C/PLTP/ID1/KLF6/TRIM21/AMDHD2/SPIDR/ERRFI1/KRCC1/PIAS1/SSBP3/BCL2/PDE7A/KIAA2013/PIM3/ARHGAP12/APIP/TAPBP/KANSL1L/AK4
LINDGREN_BLADDER_CANCER_CLUSTER_3_DN	LINDGREN_BLADDER_CANCER_CLUSTER_3_DN	213	0.304502	1.29507	0.0351124	tags=26%, list=19%, signal=21%	SPRY2/JADE2/AKAP13/BMS1/CYP24A1/ABCC5/ITM2C/TTC38/MADD/SAMD4A/NLRP1/NME4/PTPRE/MYC/TRIP6/HNMT/LDOC1/SMAD3/ADGRG6/WNT5B/DGKA/METTL17/SEMA4B/MAN2C1/TBC1D2B/AGFG1/PSD3/AP1G2/ATXN1/IGF1R/CLK3/NPM1/AJUBA/DGKH/FAM160B2/KRT17/RMND5A/FBLN7/FRMD6/ARIH1/RFX2/CD44/HMBOX1/C16orf72/ADRM1/SNX19/DAB2IP/BTF3/PML/EPB41L2/JAG1/TOB2/HEMGN/PRDX5/EML2/PDE4D
GRESHOCK_CANCER_COPY_NUMBER_UP	GRESHOCK_CANCER_COPY_NUMBER_UP	308	0.294865	1.29351	0.0259078	tags=29%, list=21%, signal=23%	CLTCL1/DDIT3/ETV1/HMGA1/CBFA2T3/TAF15/PRCC/NFKB2/ATM/TSC1/GOPC/NUMA1/TFEB/RECQL4/CBL/DDX10/KDSR/LCK/GAS7/PAX8/MEN1/CBFB/KLF6/ASPSCR1/MLLT1/MYC/MYH9/EP300/BCL6/HSP90AA1/SUFU/BCL2/HSP90AB1/ETV4/ERC1/SDHC/PICALM/PAX7/FANCA/LMO1/RAD51B/RANBP17/SET/USP6/BCL3/FAS/FSTL3/CLP1/TSC2/RNF213/NF1/NPM1/TRIM33/PDE4DIP/STK11/RUNX1T1/NTRK1/RPL22/FLCN/PDGFB/BIRC3/KMT2A/FIP1L1/ARNT/VHL/PIM1/OMD/CALCR/TSHR/POU2AF1/W…
PURBEY_TARGETS_OF_CTBP1_NOT_SATB1_UP	PURBEY_TARGETS_OF_CTBP1_NOT_SATB1_UP	273	0.299284	1.29337	0.0262642	tags=26%, list=20%, signal=21%	IER3/GDF15/PPIF/BAX/C19orf47/HDAC7/CXCL1/SPATC1L/ASB6/CAPZB/SENP2/PPM1D/TRIM47/ARFGAP1/KPNA1/PGGT1B/SMTN/G6PD/BCL6/TESK1/SERPINH1/LTBP4/GOLGA3/CMTM7/PFN1/ACD/RNF4/MAN2C1/PTPRB/MBOAT7/KHK/LGALS14/RANBP17/LTK/PRKAG2/RANBP3/PQBP1/CFH/PPFIA4/SAMD10/ITGB7/BPI/TMEM242/CST3/RUBCN/INSL4/HK2/BORCS6/MS4A6A/DSC2/RBBP8/OTUB1/CAMK1/PAPPA/FPGS/ZWINT/CCDC34/ZNF254/MAGEC1/IMMT/RBM26/SSX1/PORCN/EXOSC7/MARK3/TP53B…
ZHENG_GLIOBLASTOMA_PLASTICITY_UP	ZHENG_GLIOBLASTOMA_PLASTICITY_UP	240	0.300059	1.28972	0.0361613	tags=26%, list=20%, signal=21%	IER3/DUSP6/SPRY4/CCN1/SPRY1/CTPS1/RTL8A/NCDN/MT1X/MCM4/IGFBP4/HELLS/TPX2/POLE/UHRF1/SDC4/FEN1/VWA1/LHFPL2/ADGRG6/BMPR1B/ETV4/MCM5/KIF23/MCM2/LSM12/EPHB2/LIG1/POLA1/RCC1/CDCA8/SCN1B/ST6GAL2/GNAO1/MYO1B/PRKAR1B/PRC1/GPM6A/PIK3R3/USP1/TRIB2/LMNB1/TMEFF2/CTNNBIP1/MELK/SLC6A6/METRN/TLE1/SPARCL1/REEP3/JAG1/APLP1/NUSAP1/SLC6A11/TRIM62/AURKA/VWC2/ATP9A/CNIH2/F3/ANLN/IL13RA1
MARKEY_RB1_ACUTE_LOF_UP	MARKEY_RB1_ACUTE_LOF_UP	220	0.30116	1.28722	0.0377622	tags=33%, list=22%, signal=26%	CXCL2/KLF10/EPHX1/OTUD4/GCLM/ST3GAL4/MCM4/ANAPC11/TUBB/UBE2S/BANF1/KIF11/TIPARP/FBLN1/AMD1/DOHH/GAS6/LSM4/TPGS2/MCM5/TULP4/KIF23/WAC/SMC3/POLA1/CD34/XPO1/FAM13B/H2AX/LUC7L3/SET/WWTR1/RFC1/FAS/IGF1R/NIPBL/DCTPP1/ANP32B/HNRNPR/PRC1/NOP58/ORC6/IFRD2/CCNA2/DNPH1/AHCY/CAV1/CIP2A/TNRC6A/ASF1B/SASS6/MKI67/SNHG5/NUSAP1/CRIP2/TIPIN/AURKA/SLC39A6/CBX5/ANLN/HSPD1/TARDBP/HMGB3/PSPC1/TFDP1/TYMS/DTYMK/RBMX/MCM…
BROWNE_HCMV_INFECTION_18HR_UP	BROWNE_HCMV_INFECTION_18HR_UP	167	0.310499	1.28638	0.0480905	tags=23%, list=18%, signal=19%	CXCL8/BHLHE40/SMG7/ADGRL1/NFKBIA/DLG4/ABCC5/HELZ/KHDC4/EYA4/BAZ1A/KCTD2/ERF/AMD1/DHX30/PTPN3/PPP1R26/UPF1/HSF2/RSBN1/NF1/PPP3R1/TERF1/RUBCN/HLTF/SLC39A7/PIK3R3/SPAST/PDIA4/KCNS3/TLE3/ADCY1/TM4SF1/ZWINT/CFDP1/SH3GL3/CREBZF/UTP20
KIM_WT1_TARGETS_12HR_DN	KIM_WT1_TARGETS_12HR_DN	199	0.305215	1.2843	0.0414878	tags=22%, list=15%, signal=19%	DUSP1/CCN1/CORO2B/SMAD7/CYP24A1/CDV3/DEDD/SCG5/SMAGP/PMEPA1/GTF2F2/PLK2/RMND5B/FEN1/RBM25/MYC/MTAP/LSM4/WNT5B/RHOG/RIMS2/FBXL6/LRP8/PNN/YTHDF2/OGFR/GNL3/JPT1/TSR3/PUS1/ADK/NOP56/ANKRD55/DNAAF1/MYBBP1A/LAMB1/DUSP7/POLR3E/MCL1/ARMC8/TADA2A/PTPN7/CD44
MITSIADES_RESPONSE_TO_APLIDIN_DN	MITSIADES_RESPONSE_TO_APLIDIN_DN	239	0.298565	1.28255	0.0417827	tags=29%, list=22%, signal=23%	SLC38A2/ANKRD10/CTPS1/NUP188/MAGED1/FOXM1/MCM4/TACC3/TUBA3E/MFHAS1/HELLS/TPX2/PLEC/CBFB/TUBB/MYC/ENO2/USP7/EIF4G1/ZFP64/TPGS2/DROSHA/WDR76/MCM5/MCM2/SMC3/HNRNPD/TRAF3/CDCA8/PRPF8/CERK/IMPDH1/SLC5A3/ATXN1/KCTD12/HNRNPR/NFATC2IP/SCAMP1/CSNK2A1/POLR2B/SPEN/KAZN/EDEM3/MELK/CCNA2/SLC7A1/AHCY/RAP2A/SUMO3/GINS1/TRAM2/ZC3HAV1/ZWINT/MKI67/TUBA3C/NUSAP1/TIPIN/GPI/AURKA/HNRNPAB/PODXL/CBX5/TARDBP/MSH2/AKT3/T…
BILD_E2F3_ONCOGENIC_SIGNATURE	BILD_E2F3_ONCOGENIC_SIGNATURE	229	0.29877	1.27751	0.0462833	tags=29%, list=22%, signal=23%	SIN3B/NOL4L/SAMD1/EPHA2/PHF2/KDM4B/NFATC3/IL1B/ZNF703/RECQL4/PFKFB3/IL17RB/MFHAS1/CRY1/POLE/SAC3D1/NIPA1/CSPG5/FEN1/RBM25/LIN7B/ENO2/TNC/RAB15/FRAT1/SREBF1/PEG10/HRK/LRP8/AK4/FANCA/PKN3/ABCC10/DVL3/TMEM214/KHDRBS3/GCH1/SH3BGR/AKT1/MAP3K21/EPB41L4B/FAM171A1/TLCD3A/NEMF/CHD7/UBE2QL1/FBXO21/GINS1/DPY19L1/ZWINT/BRI3BP/GNAS/INO80C/METTL21A/STXBP1/ATAD2/KANK2/MBOAT1/TRIM7/B4GALT6/SHROOM1/TFDP1/SHANK3/P…
DESERT_STEM_CELL_HEPATOCELLULAR_CARCINOMA_SUBCLASS_UP	DESERT_STEM_CELL_HEPATOCELLULAR_CARCINOMA_SUBCLASS_UP	236	0.295511	1.2708	0.0440771	tags=18%, list=14%, signal=16%	CXCL8/TRIM28/TMEM184B/SOX9/PKM/SSB/TACC3/G6PD/HELLS/TPX2/SMOX/MARCKSL1/YEATS2/KIF11/AMD1/ARHGEF2/LHFPL2/MTMR2/SERPINH1/EPCAM/CKAP4/KIF23/MCM2/TPM2/TTLL4/TRAF5/TROAP/PRMT1/JPT1/TPD52L2/IGF2BP2/OLFML3/LAPTM4B/DKC1/PRC1/UBAP2L/NCL/NT5DC2/LAMB1/RALY/DKK1/CHD7/HK2
REACTOME_SIGNALING_BY_NOTCH	REACTOME_SIGNALING_BY_NOTCH	226	0.296102	1.27051	0.0486111	tags=27%, list=22%, signal=21%	JUN/HES1/ATP2A2/HDAC7/FURIN/MIB2/NCOR2/JAG2/ST3GAL4/B4GALT1/MDK/TBL1XR1/H2BC11/TACC3/MYC/EP300/ARRB2/SMAD3/NUMB/ST3GAL6/H2BC14/ATP2A3/H2AX/H2BC3/DTX2/TNRC6C/AKT1/ARRB1/PSEN2/HDAC8/H2BC17/DTX4/H3C1/PSMD6/PSMD3/NCOR1/AGO4/TLE3/CUL1/PSMB8/TLE1/DTX1/H4C1/YWHAZ/TNRC6A/FABP7/SIRT6/H2BC13/JAG1/PSMD7/H4C6/RPS27A/H2BC10/PSMD1/MIR449B/EGFR/TMED2/TFDP1/NOTCH2/H2AB1/MIR206
GROSS_HYPOXIA_VIA_ELK3_UP	GROSS_HYPOXIA_VIA_ELK3_UP	201	0.300594	1.26785	0.0483642	tags=31%, list=21%, signal=25%	HES1/CTPS1/PKD1/ST3GAL4/BCL7A/FAM214B/KDSR/HELLS/PLEC/CSF1/CBFB/SAC3D1/TRIM21/TP53INP1/SIGMAR1/AMD1/SSBP3/ARPP19/DPP7/FAM89B/PRKCH/PATJ/SRSF1/H2AX/CDC42SE1/JPT1/ARL6IP4/FAS/TUBB4B/ENG/ARHGAP11A/RXRA/DOK4/AJUBA/NCBP2/ARRB1/SPAST/DUSP7/FASN/MAP2K3/TIMP2/CCNA2/MAP3K11/CD276/AXL/BMP4/TNRC6A/SLC19A2/RCC2/MAPK14/DBI/MKNK2/NAIP/CRIP2/CDC25A/PPRC1/CDC23/KANK2/LGALS3BP/TARDBP/DDIT4L/NRARP/NREP
QI_PLASMACYTOMA_UP	QI_PLASMACYTOMA_UP	236	0.294661	1.26714	0.0482094	tags=17%, list=12%, signal=15%	TNF/BHLHE40/NFKBIA/SLC43A3/APAF1/ARAP2/SH3BP1/DNAJB1/TFEB/ZYX/TMOD3/IL17RB/LCK/ARF5/LIMK1/PLEC/MARCO/TRIM21/PCSK1N/BCL2/HRK/PFN1/PTPN18/PDLIM7/LTB/CD22/AVIL/CDC42SE1/TGM2/NTN1/IRF2/GRB2/RSAD2/FAS/LST1/LSP1/CCL5/ITGB7/PTGES/ARRB1/IL1R2
HAN_SATB1_TARGETS_DN	HAN_SATB1_TARGETS_DN	370	0.28284	1.26391	0.0390076	tags=20%, list=15%, signal=18%	DUSP1/BHLHE40/IL6/ABCD1/ADAMTS1/HMGA1/CXCL1/SERPINE1/VPS4A/IL1B/LSS/TOX2/VPS37B/SCG5/PDE10A/HNRNPUL1/GRWD1/MFHAS1/IGFBP4/COL6A2/OGFOD3/PSMC3IP/PMEPA1/PC/LARP4B/NET1/KRCC1/ECPAS/DVL1/FAM20C/TNC/ADGRG6/TMEM132A/C1QL1/ATMIN/ST3GAL6/ANKLE2/AK4/TSPAN13/PPME1/NSUN7/CCNG2/JUP/SQLE/ITGA3/GAA/IL32/BCKDHB/PHIP/KHDRBS3/ZG16B/TERF2IP/KAT6A/NR3C2/PTK7/POLR1C/KAT7/WDHD1/POLR2C/ARRB1/PRUNE1/PXDC1/PANK4/ITM2A/IN…
DOANE_RESPONSE_TO_ANDROGEN_DN	DOANE_RESPONSE_TO_ANDROGEN_DN	232	0.294785	1.2624	0.048951	tags=18%, list=10%, signal=16%	DUSP6/EDN1/ABCC5/SOS1/BCL7A/NCDN/SUPT6H/RECQL4/MCM4/SGTA/TINAGL1/HELLS/TRAF2/PIDD1/SNPH/KREMEN2/HLA-A/ENO2/ERF/RAD1/FBLN1/IRS1/SEMA3F/TNC/RAB15/RGS10/SMAD3/SERPINH1/ATP5F1D/MCM5/PPDPF/GPC1/KIAA0319L/TDO2/PRDM2/DGCR2/TRAF5/KHK/TBRG4/RANBP3/ATXN1/RTN1
AGUIRRE_PANCREATIC_CANCER_COPY_NUMBER_UP	AGUIRRE_PANCREATIC_CANCER_COPY_NUMBER_UP	278	0.290195	1.25641	0.0412655	tags=23%, list=17%, signal=20%	SNRNP70/PPP1R13L/BAX/TMEM94/TSEN34/GPAA1/CBLL1/TAF6/MLX/SAMD4A/GRWD1/PPP2R5D/ID1/UBE2Z/STRN4/PSMC3IP/CNPY3/FAM117A/SPOP/MYC/MTAP/ANXA13/PAK4/PRKD2/NBR1/LMTK2/LIG1/STAT5B/PRKCH/G6PC3/MBOAT7/TPM2/DMPK/NPEPPS/FBXO17/MAD1L1/LUC7L3/BRF2/PRMT1/TPD52L2/LRRC37A4P/NFKBIB/ZNF444/CNOT3/CYRIB/FBXO34/ARL17A/KAT7/WDHD1/MAFK/RGP1/YTHDF1/ANKRD40/MICALL2/HAS2/RMC1/AP2S1/NUCB1/RPL13A/GPATCH8/CMAS/BMP4/DBP/RNF38/NA…
NABA_SECRETED_FACTORS	NABA_SECRETED_FACTORS	313	0.285257	1.25521	0.038874	tags=11%, list=12%, signal=10%	CXCL2/TNF/CXCL8/GDF15/IL6/HBEGF/CXCL1/TNFSF9/WFIKKN1/CLCF1/S100A16/WIF1/MDK/IL1B/CSF1/PF4V1/CFC1/GDNF/WNT5B/CCL4/VEGFB/EGFL7/LTB/IL9/WNT9B/IL3/NGF/INSL5/FSTL3/WNT10A/IFNE/WNT4/FGF6/CCL5/CTF1
HATADA_METHYLATED_IN_LUNG_CANCER_UP	HATADA_METHYLATED_IN_LUNG_CANCER_UP	342	0.279279	1.23948	0.0474308	tags=25%, list=22%, signal=20%	SLCO4A1/ATP2A2/NFIX/HDAC7/ARHGEF1/DYRK1B/SVIL/ISL1/BANP/GRM7/PLTP/MT1E/TRPV4/LCK/IGFBP4/TACR3/NME4/CSF1/SPOCK2/CYYR1/UHRF1/LIN28A/TRIP6/ADAMTSL4/LDOC1/LRRC61/SUFU/L1TD1/PROM1/GDI1/CLMP/HAAO/TBX20/RAPGEFL1/PCDHGC4/RSPH6A/TMPRSS12/TRAF5/PDLIM1/GRIN2A/ST6GAL2/AHI1/SLC49A3/DTNB/SNX33/HLX/LSP1/BNC1/HOXA7/PDE4DIP/NCL/RIC3/TYMP/CCDC86/ESX1/SLC4A11/AJAP1/TSHR/COL1A2/ATP8A2/HOXD3/ANKS1B/POU2AF1/SLC22A3/AN…
LIM_MAMMARY_STEM_CELL_UP	LIM_MAMMARY_STEM_CELL_UP	460	0.271743	1.23367	0.0272146	tags=25%, list=22%, signal=20%	DUSP6/IL6/ADGRL1/ATP2A2/ADAMTS1/SLCO3A1/SOGA1/KLHL21/SORCS1/RBPMS/SMIM13/GEM/PKD1/MYL9/WIF1/IL1B/TBX2/PCDH7/BMP1/SMTN/TINAGL1/IGFBP4/CYGB/CADM1/PTPRE/TSPYL2/SLC12A4/MYC/ERF/PCOLCE/GOLIM4/DCUN1D3/COL9A2/SERPINH1/CNRIP1/LTBP4/TP63/UNC45A/CLMP/CHST3/PDLIM7/TPM2/BACH1/ARHGAP25/SEC24D/HSPB2/DCHS1/OSR1/SLC6A8/PPP1R18/SERPING1/NGF/AHI1/FAS/EID3/BVES/VGLL3/CD70/WTIP/BNC1/COL12A1/PXDC1/LAMB1/RNF165/ITM2A/…
RAO_BOUND_BY_SALL4_ISOFORM_B	RAO_BOUND_BY_SALL4_ISOFORM_B	497	0.26995	1.23142	0.0190768	tags=23%, list=18%, signal=20%	HES1/SPRY4/IER2/PRRC2A/ZNRF3/ANKRD10/SMAD7/IPO7/TOR3A/PTMS/GCLM/EFCAB2/SENP2/RBPMS/SALL3/GPR19/VAV3/CLDN14/DEDD/IDUA/HOXA4/ZRANB1/FOSL1/TBL1XR1/TMOD3/MPZL1/SOCS5/CIPC/DNAJB6/TGIF1/PITX2/KIFC1/KRCC1/CNOT8/CPEB2/DCUN1D3/ZFP64/WNK1/RTN4/CLEC2D/ARHGAP12/METTL17/PPP1R10/NFE2L1/UGT1A4/H2BC14/TTLL4/GADD45A/TBX18/LMO4/PACSIN2/RHBDD2/PDLIM1/ITGA3/ALMS1/STK35/NPY5R/FAM120C/BMPR2/SEPSECS/TM9SF4/DPP10/RCBTB1…
STEIN_ESRRA_TARGETS_UP	STEIN_ESRRA_TARGETS_UP	365	0.274807	1.22772	0.0480519	tags=18%, list=15%, signal=16%	DUSP1/GDF15/GSTM1/DDIT3/PPIF/OGDH/PPP1R13L/RBM38/SULT1A2/OPA1/CLUH/SIK1/CYP24A1/MRPL2/CKMT1B/JMJD6/NXF1/TWF2/SCML1/ATP1B1/TBX2/CS/UAP1L1/NDRG2/MATK/GAS2L1/GSTM4/ZNF768/RAP1GAP2/TMC6/GAS6/TMEM132A/CYTH1/RNF4/MARCHF3/PLCXD1/CYP1A1/DHRS11/ATP2A3/WDR45/ST6GALNAC4/NECAB3/RHOF/DCTPP1/CPTP/RNF34/GRPEL1/ACACB/ILVBL/ST3GAL5/HCCS/RGP1/EPOR/RNF5/TIMM17A/PCGF1/GRK4/HK1/ISOC2/NAGPA/NDUFV1/NUCB1/LEFTY1/NDRG4/A…
BERENJENO_TRANSFORMED_BY_RHOA_DN	BERENJENO_TRANSFORMED_BY_RHOA_DN	379	0.270563	1.21352	0.0466321	tags=20%, list=15%, signal=18%	BHLHE40/GSTM1/DDIT3/SLC38A2/NFIX/MT1A/TRIO/STX5/MMP14/MAGED1/MVD/GRINA/NACC2/GNAI2/TRAFD1/ATN1/ITM2C/RAB3D/CALML4/LSS/MT1X/TBL1XR1/PLTP/MAPRE3/NAB2/COL6A2/ARF5/CSRP1/IFT81/KMT2E/PIK3R1/LY6H/PCOLCE/SEMA3F/ARFGAP3/GAS6/MROH1/TLE5/RBMS2/LTBP4/SEC31A/DPP7/TAPBP/VEGFB/SDHC/RAB24/MTSS2/CELF2/CCNG2/MEIS3/GAA/SPTAN1/ZHX1/SIX4/MAP1LC3B/NYNRIN/GAS1/ST3GAL5/MAP1LC3A/EIF2AK3/RAB9A/UBE2H/RPL22/BRI3/PLD3/HSPA2…
SWEET_LUNG_CANCER_KRAS_UP	SWEET_LUNG_CANCER_KRAS_UP	441	0.264664	1.20141	0.0464824	tags=20%, list=17%, signal=17%	CXCL2/BHLHE40/DUSP6/CTSZ/SLC38A2/PHLDA1/ATP6V0C/BSG/PRCC/MT1A/CLDND1/TNFSF9/ZNF282/SERPINE1/GRINA/CRB3/ST3GAL4/ITM2C/RABGGTB/PKM/EHMT2/MT1X/ZDHHC6/G6PD/HM13/MARCO/TGIF1/NFIL3/FAM117A/ERRFI1/CDK2AP2/ZNF143/SLAIN1/EIF4G1/TLE5/EPCAM/VEGFB/CTSK/MSR1/PIP5K1B/ATP1A1/RNF4/HLA-DRB1/GADD45A/RPL36/GNL3/F7/SIVA1/STXBP2/MRC1/EDEM1/GCH1/RFK/TPI1/TOB1/MLEC/POLR1C/CYRIB/MRPS18B/RRBP1/CCT3/SCAMP1/NCL/ETV2/PFKL/F…
MOOTHA_MITOCHONDRIA	MOOTHA_MITOCHONDRIA	415	-0.234191	-1.15948	0.0365324	tags=29%, list=22%, signal=23%	GRB10/MTX1/ACAA1/PPA1/COX6A1/ENDOG/OTC/MRPL48/PCCB/PDHB/SARDH/MLYCD/COX7A2/ME2/ATP5PO/SLC25A20/NDUFB6/NNT/ATP5PB/ALDH2/MRPL13/ATP5MF/PDK1/POLR3B/NDUFA8/MRPL11/SLC25A40/BCKDK/NDUFA6/NDUFC1/MRPL33/TST/ME3/MRPL22/MRPL46/MRPS18C/LARS2/ECI1/DCTN6/TIMM17B/SLC25A32/ACP6/NME2/PLA2G1B/UQCRC2/MRPL15/IVD/SLC25A36/SPG7/MRPS11/MRPL39/NFS1/EHHADH/ANXA7/GPD2/PPOX/PKLR/COQ7/BCKDHA/SLC25A22/COX5B/PRPF6/LGALS3/MAS…
CHEMNITZ_RESPONSE_TO_PROSTAGLANDIN_E2_DN	CHEMNITZ_RESPONSE_TO_PROSTAGLANDIN_E2_DN	357	-0.243741	-1.18683	0.0390425	tags=24%, list=18%, signal=20%	EPS8L1/SPSB3/ADAM10/ADGRA3/WDFY3/LRRC19/ANXA11/RELN/MSLN/DYNLT1/SYTL2/RGS12/SLC2A9/ARHGEF16/RWDD1/AP1S3/FAIM/SPAG6/BCL11A/CFAP69/TSPAN1/SPTLC3/RSPH3/PDF/TJP3/CHL1/IP6K2/SLC6A20/TCAIM/OPN3/ZNF599/IFT74/GK5/NFAT5/DPP4/RBP4/VWA5A/FNDC3A/PDCD6IP/DSG2/CTSC/SLPI/SHMT1/CD200/BBS4/MCFD2/INSYN1/CCND2/AKAP12/SENP3/ACSS2/CLIC4/SDHAF3/MED11/PARP4/TRIOBP/OSCP1/P4HTM/CYP4V2/TPMT/NLRX1/PITPNA/SERTAD4-AS1/PIGV/T…
OSMAN_BLADDER_CANCER_DN	OSMAN_BLADDER_CANCER_DN	378	-0.242653	-1.19438	0.041011	tags=29%, list=21%, signal=23%	NMT2/RPS4X/SKAP1/GZMK/CCAR2/LEPROTL1/SPATA2L/SIAH1/CEP57/IDS/XPO7/SS18L2/CD53/C2orf68/NFYA/RPL36A/H4C8/PPHLN1/SRSF8/COL18A1/RPL10A/H2AC6/LYRM9/ST13/RPS13/KMT5B/EIF4A2/RPL23A/EDF1/RPS20/SART1/CSTF2T/INPP5F/RNF216/ZFAND2A/SENP1/SERINC3/NINJ1/RPS25/UBE2B/SGK1/EPB41/ABCG1/SNORD12C/MYO1F/SAFB/PPP2R5C/MRPS25/RPL4/STRBP/PRKAR1A/RUBCNL/NAA10/IP6K2/OCIAD2/PRDX3/ISG20/RPS21/CTDSP2/GGA2/SNORA24/OGT/SEPTIN6/…
HSIAO_HOUSEKEEPING_GENES	HSIAO_HOUSEKEEPING_GENES	383	-0.245362	-1.20909	0.0385761	tags=22%, list=14%, signal=19%	RPL17/EIF3F/RPS25/EIF4H/S100A10/TNNT2/HLA-DRA/KARS1/UBE2D3/RPL4/HMGN2/PI4KA/RPL36AL/LGALS3/NAP1L1/ISG20/PSMD8/EEF1D/FUCA1/RPS21/ATP5F1C/CTDSP2/BCLAF1/SERPINB6/RPLP1/ABLIM1/PTMA/GPS1/RPL29/COX10/RPS6/TCEA1/RPS2/SPCS2/FUS/RPL8/HPN/RPL18/PSME1/ALDOA/RPS29/CLU/NDUFA12/IFITM1/CCND2/B2M/SPTBN1/ARAF/RPS15A/UQCRB/MLH1/RPSA/RPL7A/RPS26/RPS15/SLC25A3/TRAF4/RPLP0/RPL6/RPL14/SON/MARCKS/STMN1/RPL7/FNTA/PSMC1/…
YAUCH_HEDGEHOG_SIGNALING_PARACRINE_DN	YAUCH_HEDGEHOG_SIGNALING_PARACRINE_DN	235	-0.262021	-1.21239	0.039913	tags=24%, list=19%, signal=20%	CEP128/KCNK1/ACTN2/ANKRA2/DYNLT1/ASB15/CENPH/PSRC1/NEXMIF/IL16/HIF1A/MYH1/SLC5A12/AQP5/MC1R/TNNT2/DLK1/CPA6/SBSPON/NR6A1/ARPP21/GRIK1/KYAT1/PRDM16/RUFY2/TMOD4/COA7/BCLAF1/CASQ2/SERPINB2/SERPINA1/SLC22A9/APOM/CFAP206/KLHL41/CHRNA9/ZSWIM5/NAV2/MYF6/POT1/UTP23/CACNA1B/CD28/DPY19L2/METTL21EP/C1orf50/MEIOB/NECTIN3/CTSL/PCDH10/CCDC151/TRIM17/CCDC7/TRIM63/NPAS3/MYBPC2
CAIRO_HEPATOBLASTOMA_DN	CAIRO_HEPATOBLASTOMA_DN	250	-0.264311	-1.22476	0.0269323	tags=20%, list=14%, signal=17%	HGD/ANO1/FAM149A/RAB27A/STARD5/NQO2/VSIG4/KCND3/UGP2/HAO2/TENT5A/CRHBP/CYP4F3/IGFBP3/ENO3/SLC3A1/OSBPL1A/ANG/MMUT/LYVE1/SLPI/SHMT1/MPC1/CYP2C19/AKR1D1/PRG4/CLEC1B/CHST7/NRG1/PDLIM5/CP/SLC10A1/ACSL1/HPGD/RIDA/FXYD1/ABHD2/AGL/CYP2J2/FAHD2A/GBA3/LEPR/GSTZ1/MASP2/DAO/ABAT/ID2/ASS1/NAMPT
BLANCO_MELO_BRONCHIAL_EPITHELIAL_CELLS_INFLUENZA_A_DEL_NS1_INFECTION_DN	BLANCO_MELO_BRONCHIAL_EPITHELIAL_CELLS_INFLUENZA_A_DEL_NS1_INFECTION_DN	167	-0.277755	-1.22966	0.0428536	tags=24%, list=16%, signal=20%	PSRC1/PTTG1/CDC45/DTL/KIF14/TRAIP/PGPEP1/KIF20A/CLSPN/TRIM45/MND1/TOP2A/EXO1/PRIM1/CEBPA-DT/SFXN2/MTFR2/CDCA7/LURAP1L/CENPO/NSD2/OSBPL7/NEK2/NUF2/MCM7/PPARGC1B/ZSCAN31/DEPDC1B/BRCA1/CBX2/ZNF90/HILPDA/PRR15L/CDC25C/PRR11/NEIL3/HMMR/HROB/FANCG/FANCB
CAIRO_LIVER_DEVELOPMENT_DN	CAIRO_LIVER_DEVELOPMENT_DN	202	-0.27089	-1.23572	0.0447821	tags=31%, list=25%, signal=23%	LRP1/SERPINC1/GLDC/SLC37A4/AHSG/TMPRSS2/CAMP/VTN/C5/PDE8A/HSD17B2/PRTN3/SERPINF1/AMBP/TNFRSF11A/SMPDL3A/ABCA8/PLG/SLC44A4/FGB/KDELR3/COL18A1/TST/SELENBP1/STAB2/CSAD/GJB1/SPP2/TENT5A/CPQ/GRIK1/ANGPTL3/CD68/ISG20/ALOX5AP/CPS1/NCAPH2/SERPINA1/MATN2/AQP1/H6PD/HPN/CYBB/PHYH/F12/LYZ/AGT/NABP1/CTSH/ITIH3/PCSK7/BRCA1/ACSL1/ALDH3A2/RIDA/C3/PCYT2/PLAC8/LIPC/MORC4/SQOR/ABCC6
FARMER_BREAST_CANCER_APOCRINE_VS_BASAL	FARMER_BREAST_CANCER_APOCRINE_VS_BASAL	307	-0.258078	-1.23644	0.0264444	tags=26%, list=18%, signal=21%	UBE2C/LYN/RNF138/REEP5/QKI/UTP25/MYL6B/KCNMA1/SC5D/NEDD4/SLC35A3/KIF14/ECHDC1/IDH1/PPIC/ADCY7/KIF20A/HGD/ACSL3/S100A13/FABP5/BCL11A/AKR1A1/OPTN/TOP2A/GPD1L/ZWILCH/PRKAA1/TFAP2B/PGRMC2/TMEM135/RND1/SEC23B/SAR1B/TMEM158/VWA5A/HOXB2/SERHL/DALRD3/CLGN/NT5C2/EN1/PRKACB/GSPT2/NR2F1/TRMT11/MAPT/CLU/CDC20/AKR1D1/MAOA/ATP11B/PHKB/GPM6B/TP53TG1/GALNT7/ENOSF1/CCNDBP1/CADPS2/NAV2/DMD/UGT2B11/GALE/MSMO1/ACSL1…
MIKKELSEN_NPC_ICP_WITH_H3K4ME3	MIKKELSEN_NPC_ICP_WITH_H3K4ME3	410	-0.253041	-1.25212	0.00850134	tags=30%, list=21%, signal=24%	HSD17B11/DTNA/LOXL3/CAPN1/ZKSCAN5/MOSPD1/TLR2/IGBP1/NEIL1/KCTD20/DYNLT3/ZRANB3/ZNF608/GRN/PCDHB13/ABCA8/SLC12A6/TMEM256/FAM111A/THBS3/LYSMD4/SPSB3/DECR2/NIF3L1/WDCP/PTN/HDAC6/ASB15/HDAC9/TMEM100/TPCN2/KIF14/CYB5R2/NQO1/SLITRK1/FAM214A/SERPINI1/KLHL5/ASB7/ACSBG1/CFAP52/RUFY3/ZNF112/ZNF429/PPP2R5C/NUDT13/FRG2C/TJP3/CAVIN2/ZNF585A/ZSWIM2/SOX5/PRIM1/ATP13A4/CTSO/TRIM16/ANGPT1/SMIM26/ARHGAP18/FAM13A/P…
JOHNSTONE_PARVB_TARGETS_2_DN	JOHNSTONE_PARVB_TARGETS_2_DN	313	-0.261598	-1.25578	0.0187545	tags=29%, list=21%, signal=23%	KCTD20/HSPA1A/FSD1L/ZNF83/RCN2/GTF2A1/ADO/GULP1/NFYA/ZDHHC2/DST/SLC25A40/ENPP1/CAP2/RCHY1/CAMK2D/CILK1/CPE/PRPF39/DEF6/ANKRD13C/SRGN/SRPK1/DPYD/F2RL1/PDGFC/NQO2/OXR1/GORAB/PPP2R5C/TMEM128/RRP36/CSNK1A1/WIPF1/STK17B/PRIM2/ETNK1/ANGPT1/B3GALNT1/NUDT21/DHX15/TMPO/CST7/CBWD1/B3GNT5/PRPF4B/RIOK1/PGBD1/MMUT/CNIH1/SEC24B/SLC30A5/VPS13A/SSBP2/RBFOX2/USP4/UBTD2/SRSF10/ATP11B/TMEM165/CLIC4/RBBP4/GALNT7/SLC…
JINESH_BLEBBISHIELD_TRANSFORMED_STEM_CELL_SPHERES_UP	JINESH_BLEBBISHIELD_TRANSFORMED_STEM_CELL_SPHERES_UP	158	-0.285039	-1.2575	0.0255601	tags=22%, list=7%, signal=21%	NQO1/MX1/KLHL5/F2RL1/AP1S2/RAB27B/SLC7A2/DEFB1/SLC40A1/IGFBP3/ABLIM1/SPRR3/C17orf58/SPTSSA/NSD3/PARP4/MFSD6/TMEM106B/RASL11B/SLC14A1/LAMP3/ALDH3A2/RAB22A/ABHD2/RGCC/SRSF7/AZIN1/SPRR1A/ICA1/ALDH1A3/TXNIP/ST3GAL1/PLPP3/ASS1/ANXA2
REACTOME_DISORDERS_OF_TRANSMEMBRANE_TRANSPORTERS	REACTOME_DISORDERS_OF_TRANSMEMBRANE_TRANSPORTERS	163	-0.284639	-1.26158	0.0243055	tags=29%, list=24%, signal=23%	ABCA3/ERLEC1/UBB/PSMD2/NUP62/PSMD10/NUP35/NUP205/ABCA1/SLC33A1/SLC12A6/SLC24A5/PSMD13/PSMF1/ABCB4/SLC2A9/SLC35A3/NUP54/AVPR1A/ABCD4/NUP98/NUP37/SLC6A20/PSMD8/SLC40A1/AVP/PSMB10/PSMA2/SLC3A1/SLC27A4/SLC29A3/NUP50/RAE1/PSME1/VCP/SLC20A2/PSMA1/PSMA6/CP/PSMC6/PSMC1/POM121C/SLC3A2/PSMC4/NUP155/SLC4A4/ABCG5/ABCC6
HSIAO_LIVER_SPECIFIC_GENES	HSIAO_LIVER_SPECIFIC_GENES	230	-0.272897	-1.26279	0.0353095	tags=32%, list=23%, signal=25%	CYP2A6/MGST1/TTR/MGST2/SDS/HSD11B1/SERPINC1/AHSG/ACADSB/APOH/VTN/APCS/C5/ADH1A/ACAA1/C1S/PCK1/OTC/SERPINF1/PCCB/ALDH2/PLG/SAA1/FGB/ACSM3/LAMP2/PGRMC1/TST/SC5D/ABCB4/PLOD2/LGALS4/BZW1/HGD/GJB1/UGT2B15/SPP2/CRHBP/APOA2/CPS1/CYP4F3/RBP4/F13B/SERPINA1/ANG/PRDX4/MMUT/HPN/SHMT1/RGN/F12/AKR1D1/GSTA1/AGT/NR1H4/UGT2B7/HMGCL/CAT/ITIH3/AGTR1/CP/SLC10A1/MSMO1/ACSL1/ALDH6A1/RIDA/FGL1/C3/CYP2J2/LIPC/GSTZ1/ASS1…
BLANCO_MELO_BETA_INTERFERON_TREATED_BRONCHIAL_EPITHELIAL_CELLS_DN	BLANCO_MELO_BETA_INTERFERON_TREATED_BRONCHIAL_EPITHELIAL_CELLS_DN	195	-0.278727	-1.26458	0.0274035	tags=15%, list=9%, signal=14%	SPRR3/CLCA4/SLPI/PLA2G4E/SCNN1B/SIX5/ZNF467/SULT2B1/LURAP1L/SOX6/CARD14/ANKRD35/ATP6V1E2/NLRX1/PHLDB3/ZSCAN31/RASL11B/CEP68/HPGD/CYSRT1/CBX2/HYAL1/NGEF/PRR15L/ARHGAP33/SPRR1A/LYNX1/HROB/SLC43A2
WALLACE_PROSTATE_CANCER_RACE_UP	WALLACE_PROSTATE_CANCER_RACE_UP	271	-0.270281	-1.26626	0.0289656	tags=27%, list=19%, signal=22%	FBN2/ADGRE5/MMP19/CD53/CD1E/IFI44/NFASC/PI15/EOGT/ECHDC3/IL16/CD1C/IL15/SRGN/ADCY7/GBP1/MX1/GPRC5B/POM121L9P/CROCCP2/IGLL3P/SYT11/IFI27/HLA-DRA/VSIG4/OPTN/CD8A/PDZRN4/PLEK/ITIH5/AHNAK2/CHRDL1/WIPF1/STK17B/PRIM2/ISG20/ALOX5AP/RAC2/TMEM158/ERAP1/CD3D/SEPTIN6/NCKAP1L/SERHL/CCR5/CTSC/GLRX/SEPTIN11/SELP/STAT1/CMAHP/NR4A2/LYZ/CLU/IFITM1/CNN1/SELE/CD86/APOL1/IFI44L/AMFR/RNASE1/CD28/LAMP3/BCL2A1/TAP1/XAF…
MIKKELSEN_NPC_HCP_WITH_H3K4ME3_AND_H3K27ME3	MIKKELSEN_NPC_HCP_WITH_H3K4ME3_AND_H3K27ME3	202	-0.277649	-1.26655	0.0307722	tags=37%, list=27%, signal=27%	EGR4/ADAMTS2/VSTM2B/SATB1/PSMB9/CASZ1/FOXF2/FAM78A/GNAL/KNDC1/BAIAP2L1/NTNG1/CDKN1A/CXCR4/ESRRB/CCDC85A/CHST8/BHLHE22/NOG/GPC5/OCLN/P4HA2/CAMKK1/GALNT14/PLXNA4/HOXC5/KCNH3/GAD1/KCNK1/KDELR3/PTGFRN/RELN/SOX1/KCNMA1/FOXC2/AK5/CRH/HMX1/NMNAT2/NEFL/CHRNA5/PLAG1/ERBB3/RET/CCNO/FOXQ1/SNTB1/EMB/AFF3/TSPAN18/SLC40A1/ICA1L/A4GALT/KCNA1/KCNC4/TMTC4/PCDH8/ADAMTS8/RASGRF1/ATP7B/ZNF296/RASSF5/FGF5/CLDN23/SFI1…
LINDGREN_BLADDER_CANCER_CLUSTER_3_UP	LINDGREN_BLADDER_CANCER_CLUSTER_3_UP	307	-0.265295	-1.27102	0.0146915	tags=24%, list=16%, signal=21%	PTTG1/CDC45/RCAN1/DBF4/KIF14/TRAIP/ATP6V1C1/ST8SIA3/RNFT2/NQO2/AP1S2/TOP2A/NEU1/TMED5/CSTF2/CHAF1B/ATG5/EXO1/HMGN2/SLC23A1/REXO5/RAD18/NXT2/SEC23B/FAM136A/IL2RA/GCA/TMPO/CDKN2C/CDK2/ERBB2/FIGNL1/PIGC/PRDX4/POC1A/PIK3AP1/NEDD9/TFG/POLDIP2/GOLT1B/SHMT1/TRMT6/RFC4/AKAP12/UHRF1BP1L/H3C10/RBBP4/HMGB2/KIFAP3/SNX4/EZH2/GLO1/NEK2/MRPS12/ALAS2/CSTF3/PPA2/MED8/MORN2/RASL11B/BRCA1/LINC00173/ACSL1/STMN1/H2BC…
LAIHO_COLORECTAL_CANCER_SERRATED_UP	LAIHO_COLORECTAL_CANCER_SERRATED_UP	105	-0.299944	-1.27197	0.0485928	tags=33%, list=22%, signal=26%	C1S/GCNT3/PRNP/BCAP29/NPTN/COMMD3/ADAM10/IL6ST/SC5D/PPIC/HIF1A/GBP1/DPYD/PDGFC/IFI27/SUMO2/OPTN/PRKAR1A/CSNK1A1/SPG21/RPL36AL/ATP5F1C/NOP10/PMP22/CHMP2B/B2M/BNIP3L/MRPS14/NXN/PDLIM5/CCN2/VAPA/CAPZA1/SELENOT/ANXA2
HOSHIDA_LIVER_CANCER_SUBCLASS_S3	HOSHIDA_LIVER_CANCER_SUBCLASS_S3	245	-0.274226	-1.27296	0.0147019	tags=27%, list=19%, signal=22%	ALDH2/PLG/ATOX1/CTH/FGB/GPX2/SLC6A1/COL18A1/PGRMC1/TST/ABCB4/ECI1/SORL1/SELENBP1/IVD/EHHADH/HGD/GJB1/PKLR/CRYM/SLC7A2/PPP2R1B/TMOD1/SLC23A1/COX5B/CTSO/SLC35D1/CPS1/HMOX2/ARHGEF12/MMUT/RNASE4/SLPI/SHMT1/RGN/BLOC1S1/MAOA/CAT/DCAF8/UQCRB/ITIH3/NRG1/TPMT/AMFR/HADH/CP/TJP2/SLC10A1/MSMO1/ACSL1/ALDH6A1/ALDH3A2/RIDA/CYFIP2/TCEA2/ABHD2/FLT4/AGL/CYP2J2/ADA2/GSTZ1/GGH/DAO/ASS1/ABCC6/BLVRB
SCHAEFFER_PROSTATE_DEVELOPMENT_6HR_UP	SCHAEFFER_PROSTATE_DEVELOPMENT_6HR_UP	145	-0.289531	-1.27386	0.0462263	tags=26%, list=16%, signal=22%	FGF18/KLF9/TMEM126A/GIN1/CXCL13/SERINC3/IARS1/ZNF185/CLEC14A/CAVIN2/SPPL2A/PAIP1/CTSO/B3GALNT1/QPCT/PIAS2/SLC7A3/VWA5A/CNIH1/COLEC12/HNRNPDL/MPC1/ATP6AP2/B2M/SCYL3/SLC38A9/OGN/C1GALT1C1/EIF2AK2/SP110/FNDC1/LHX6/AGL/EBAG9/PSMC6/PDCD10/CAST/CASP4
MEBARKI_HCC_PROGENITOR_FZD8CRD_DN	MEBARKI_HCC_PROGENITOR_FZD8CRD_DN	398	-0.25729	-1.27394	0.00818482	tags=26%, list=11%, signal=24%	LDHD/SLC25A20/PDE11A/CREB3L3/CLRN3/C11orf86/GULP1/REEP6/SMPDL3A/MMP19/C5orf46/FGB/HIP1R/ACSM3/SPX/EPHX2/LYRM9/VEGFA/ABCB4/VSX1/ACMSD/ACSM5/TMEM100/PAIP2B/SELENBP1/ORM2/CXCL13/SNAI3-AS1/HGD/GJB1/ERBB3/NUDT7/SNORA47/CRYM/SGK1/CHRD/HAO2/SLC23A1/CLCNKA/GSTA5/CYP4F3/SLC40A1/DPP4/ENO3/CLIP3/CTDSP2/GAS6-AS1/PDE8B/RAB26/F13B/ARID5A/SERPINA1/SOX13/DIPK1B/ANG/SULT1C2/SLC22A9/GLRX/ITGA10/H6PD/HPN/RNPC3/RGN/…
VECCHI_GASTRIC_CANCER_EARLY_DN	VECCHI_GASTRIC_CANCER_EARLY_DN	350	-0.261779	-1.27569	0.0149831	tags=23%, list=17%, signal=20%	RBPMS2/TMEM100/ECHDC3/CDH19/CPE/NEXMIF/KLF9/CLDN10/CFL2/ALDH1L2/PLCXD3/FAM214A/SERPINI1/MAMDC2/PDGFC/ADTRP/UGT2B15/RAB27A/PPOX/CNTN1/CEP85L/KLF15/CAVIN2/SBSPON/ZNF385B/ATP13A4/RGS13/ITIH5/ACKR4/CHRDL1/HDGFL3/UGT2B17/ANGPT1/PRDM16/TMEM47/HLA-DOB/SLC36A4/AFF3/SCUBE2/PCDH20/SEPTIN6/CASQ2/EFEMP1/BEX5/LYVE1/PRKACB/SNX24/GSPT2/CYP2C19/CLU/MAOA/CNN1/GSTA1/ARMCX1/CD79A/CBLIF/GPM6B/MAL/SOX6/MCTP1/USP51/DM…
CHIANG_LIVER_CANCER_SUBCLASS_UNANNOTATED_DN	CHIANG_LIVER_CANCER_SUBCLASS_UNANNOTATED_DN	188	-0.284742	-1.27903	0.0195821	tags=36%, list=23%, signal=28%	ADH5/HIKESHI/TSPAN6/RNASEH2A/PSMD10/EBPL/ACTR6/HAT1/SPOPL/ME2/CITED2/TMX1/ATG3/OSTC/NUP205/RCN2/CDKN3/CCNB2/MRPL13/TM9SF2/FCGR3A/DNAJB9/CENPH/CD46/MRPL39/SNX7/WASHC5/DCUN1D5/S100A10/NUP37/CHCHD2/G3BP2/NEU1/CIAO2A/YAP1/SMIM26/ALG13/NUDT21/CTNNAL1/SEC23B/PSMD8/TPRKB/PSMA2/GLUD2/ZNHIT3/UQCRFS1/EEF1AKNMT/PRDX4/ABCB10/RAD51AP1/RAE1/ALDOA/HSPA13/LYZ/RFC4/WDSUB1/CCNDBP1/MRPS12/RPL7A/LAMTOR5/C1GALT1C1/MO…
CHIANG_LIVER_CANCER_SUBCLASS_PROLIFERATION_DN	CHIANG_LIVER_CANCER_SUBCLASS_PROLIFERATION_DN	164	-0.289702	-1.28093	0.0403892	tags=30%, list=21%, signal=24%	PCK1/OTC/MLYCD/LDHD/DHRS1/ABCA8/PLG/F8/CDC14B/CTH/CPT2/NR1I2/COL18A1/NAGS/TST/ABCB4/ACSM5/ECHDC3/KLF9/ABCA6/SELENBP1/MPDZ/EHHADH/NUDT7/NECAB2/OASL/ANGPTL3/AMDHD1/CYP4F3/ALDH5A1/RGN/F12/BLOC1S1/CPED1/CAT/GRHPR/HADH/RORC/SLC10A1/ALDH6A1/ALDH3A2/CYP3A43/CYP2J2/DEPDC7/LINC01018/MASP2/NUDT6/DAO/ABAT
FOSTER_TOLERANT_MACROPHAGE_UP	FOSTER_TOLERANT_MACROPHAGE_UP	151	-0.291689	-1.28303	0.0263329	tags=21%, list=13%, signal=18%	SGK1/SLX4IP/SLC7A2/CEP85L/CYCS/ISG20/TANK/TNFRSF1B/RAB32/CST7/GLRX/PIK3AP1/STAT1/TRIM23/CD200/RIOK3/RNASET2/LOX/NAV2/IL18BP/CP/SLC7A8/ACSL1/BST2/HILPDA/ADHFE1/XAF1/SLFN12/SMAD6/PLPP3/ID2/ASS1
LIN_NPAS4_TARGETS_UP	LIN_NPAS4_TARGETS_UP	160	-0.290179	-1.28386	0.0485448	tags=23%, list=17%, signal=19%	CFAP97/KIF3B/DDHD2/RCAN1/FAM8A1/ALDH1L2/PLCXD3/DNAJC27/MYCL/SGK1/FBXO8/MTX3/ADD2/B3GALNT1/SLC8A1/SLC27A4/CCT7/TBCK/LNPEP/LRSAM1/CDKN1B/LYPD6/XKR6/ARHGEF7/CHMP2B/MFSD6/MARCHF8/C3orf14/SLC24A3/CCNG1/C2orf69/LRFN1/CAPN7/NUP155/PKIA/DMAC2L/PTP4A1
WONG_MITOCHONDRIA_GENE_MODULE	WONG_MITOCHONDRIA_GENE_MODULE	207	-0.281467	-1.29288	0.0247705	tags=35%, list=26%, signal=26%	NDUFA10/DAP3/ATP8A1/COX7C/NDUFB5/COX7B/MRPL36/CRYZ/NDUFB3/PDP1/ACADSB/ATP5MC3/NDUFS8/COX6A1/PCCB/PDHB/COX7A2/SEC61G/ATP5PO/NDUFB6/ATP5PB/SCO2/MRPL13/ATP5MF/ATOX1/NDUFA8/UQCRQ/MRPL11/NDUFA6/UQCR10/NDUFC1/MRPS18C/ECI1/DCTN6/TIMM17B/SLC25A32/NQO1/NFS1/MCEE/ATP6V1C1/TRIM45/GPD2/KARS1/UNG/MTRR/SLC25A22/COX5B/MRPL3/SFXN2/HAX1/SLC40A1/ATP5F1C/UQCRFS1/ATP5F1E/DUT/TOMM40/MRPL40/FDXR/NDUFA12/MAOA/UQCRB/AIF…
YAO_TEMPORAL_RESPONSE_TO_PROGESTERONE_CLUSTER_13	YAO_TEMPORAL_RESPONSE_TO_PROGESTERONE_CLUSTER_13	162	-0.297746	-1.31902	0.0243824	tags=30%, list=21%, signal=24%	COX6A1/CUTA/PCCB/SEC61G/ATP5PO/SNRPG/HDDC2/MRPL13/TOMM5/REEP5/MRPL11/DPM3/UQCR10/NDUFC1/TMEM205/UBL5/PSMG4/UQCRC2/CCZ1/S100A10/C9orf78/CETN3/FKBP3/PPP2R5C/MIEN1/CIAO2A/COX5B/LYRM2/MRPL52/TXNDC17/ATP5F1E/MTMR9/CKAP5/CAT/DBNL/PSMA6/UQCRB/LAMTOR5/MRPS33/PPIB/PMPCB/CHMP2A/S100A6/MRPS18A/C1D/SNX10/TIMM8B/HNRNPA1/ANXA2
KESHELAVA_MULTIPLE_DRUG_RESISTANCE	KESHELAVA_MULTIPLE_DRUG_RESISTANCE	77	-0.331205	-1.32416	0.0424269	tags=43%, list=25%, signal=32%	CD151/TAF12/HFE/CCDC92/OAS1/SIL1/LAMTOR2/HGSNAT/MSRB1/C22orf46/BABAM2/ENC1/KLRF1/UFC1/MYO1F/ADAM15/USE1/PCTP/VPS33B/NXT2/GGA2/CDKN2C/MAGOHB/TP53TG1/CCS/MED8/PDLIM5/TSPAN31/DNALI1/PEX10/CASP4/BCL7B/BLVRB
REACTOME_SPHINGOLIPID_METABOLISM	REACTOME_SPHINGOLIPID_METABOLISM	88	-0.323991	-1.32416	0.040708	tags=34%, list=22%, signal=27%	OSBP/ALDH3B2/ASAH2/ARSA/ACER1/SPHK2/ORMDL1/SGPP1/GLB1/SUMF1/ARSI/SMPD3/PPM1L/GLTP/ENPP7/SPTLC3/NEU1/GLA/B3GALNT1/ASAH1/B4GALNT1/UGCG/SPTSSA/ARSK/PRKD1/ALDH3A2/VAPA/ARSD/PLPP2/PLPP3
IVANOVA_HEMATOPOIESIS_INTERMEDIATE_PROGENITOR	IVANOVA_HEMATOPOIESIS_INTERMEDIATE_PROGENITOR	124	-0.306958	-1.32434	0.0496761	tags=42%, list=29%, signal=30%	TMEM186/RABEPK/C7orf50/CISD1/SSR2/SPCS3/GMPPA/NIPSNAP3A/CDADC1/PRAG1/G3BP1/ERCC8/POLR3C/MDH1/TNS3/NOC3L/ERMARD/NEBL/DDX52/GALK1/DHX37/GCNT3/CITED2/TMEM97/UTP25/DDX20/COMMD10/MAP3K20/FAM149B1/MRPS25/GTF3A/ENOPH1/ATL3/TXNDC15/PLAA/WDR73/ALDOA/ATP6AP2/TRMT6/BLOC1S2/MAOA/GTPBP8/TAMM41/MAPKAPK3/ARMT1/RASSF4/CBLN3/ZNF706/EEF1B2/PLAC8/THOC5/PGAM1
LIU_VAV3_PROSTATE_CARCINOGENESIS_UP	LIU_VAV3_PROSTATE_CARCINOGENESIS_UP	81	-0.32926	-1.33212	0.0489032	tags=25%, list=12%, signal=22%	LGALS3/EPHA4/PSMB10/CDKN2C/TIMP4/PLA2G7/STAT1/FUS/CYBB/GPNMB/CCND2/MBP/GBP2/AGTR1/KLK3/BCL2A1/TAP1/C3/IRF1/ARHGDIB
SHEN_SMARCA2_TARGETS_UP	SHEN_SMARCA2_TARGETS_UP	404	-0.273362	-1.3476	0.00093095	tags=29%, list=22%, signal=23%	RALB/ISCU/RBM22/TFCP2/PRKRA/PDHB/TMEM230/ATP5PO/CUL4B/ATG3/CEP57/NDUFB6/PJA2/TTC33/IDS/NPTN/NNT/MAPK9/ARFIP1/TGOLN2/TLK1/KTN1/TRAPPC4/TWF1/WDFY3/COPS2/ST13/ANGEL2/PSMF1/MKKS/TMEM126B/COMMD10/UQCRC2/RCOR3/VPS26A/GIN1/ZDHHC17/SCAF8/ANXA7/SERINC3/CALCOCO2/PAFAH1B1/CETN3/ABI1/PPP2R5C/GMPR2/PAIP1/PRKAR1A/C11orf58/GTF2H5/FBXO3/PIBF1/FEM1B/SUMO1/TMEM135/NUDT21/TANK/TMED7/UPF3A/EAPP/CENPC/BBIP1/BCLAF1/TR…
HOLLMANN_APOPTOSIS_VIA_CD40_DN	HOLLMANN_APOPTOSIS_VIA_CD40_DN	247	-0.290723	-1.35201	0.00757842	tags=31%, list=20%, signal=25%	SKAP1/TMX1/RCN2/MSRB1/OSR2/LXN/CD58/TRIM44/LDB3/BABAM2/UROS/DECR2/RNF138/HOXA9/H2AC6/PKIG/HDAC9/CANX/CYB5R2/IFIH1/CPVL/THUMPD2/IGLL3P/NINJ1/CD9/HOXA10/LDAH/RUBCNL/GTF2H5/RPL36AL/PCTP/SP140/UTS2/B3GALNT1/MGAT2/PDE4B/EEF1D/TIMM22/HLA-DRB4/CTSC/SEPTIN11/STAT1/TFG/RPL8/CDKN1B/PSME1/PHYH/IFITM1/RWDD2B/PPM1F/CHMP2B/MBP/SPTBN1/ZNF274/CD79B/KLHL9/BCR/H2BC6/PPA2/NXN/MSRB2/CRYZL1/ANKMY2/ZNF195/GSDMD/ACOT2/…
TURASHVILI_BREAST_LOBULAR_CARCINOMA_VS_DUCTAL_NORMAL_DN	TURASHVILI_BREAST_LOBULAR_CARCINOMA_VS_DUCTAL_NORMAL_DN	82	-0.333728	-1.35362	0.0471115	tags=29%, list=21%, signal=23%	RARRES1/TM4SF18/ID4/SAA1/DST/PI15/AK5/SORL1/CYB5R2/ELF5/MRPS25/PNMA8A/LYPD6/RIOK3/MAOA/CNN1/ATP11B/DMD/CP/HOOK1/PDZK1/GABRP/CYP2J2/PTGER4
ZHANG_BREAST_CANCER_PROGENITORS_UP	ZHANG_BREAST_CANCER_PROGENITORS_UP	409	-0.274433	-1.3557	0.00249457	tags=23%, list=16%, signal=20%	HACE1/DBF4/PLCB1/AP1S3/SGO2/COL25A1/TMEM209/POLR3H/ACSL3/CEP192/UBE2B/EIF4H/BCL11A/CETN3/PRELID3B/G3BP2/PDS5B/TOP2A/UNG/CSTF2/TAF1D/STRBP/DUSP11/PRIM1/ACYP1/ALG13/ARMC10/ZNF362/ACTR3B/TMPO/BBIP1/NUDCD1/HNRNPA2B1/PABPC4L/FIGNL1/DSG2/CTDSPL2/ZC3HAV1L/TCEA1/TMTC4/TTC9C/RIF1/LSM5/SHMT1/HNRNPDL/TRMT11/SRSF10/TRMT6/KBTBD8/CDCA7/PIN1/CAV2/GPM6B/TRDMT1/SLC20A2/TRPM3/HMGB2/PRR14L/EZH2/UBLCP1/LAMTOR5/HNRNP…
PLASARI_TGFB1_SIGNALING_VIA_NFIC_10HR_UP	PLASARI_TGFB1_SIGNALING_VIA_NFIC_10HR_UP	56	-0.356119	-1.35663	0.048158	tags=29%, list=19%, signal=23%	IFI44/SEMA3C/GVINP1/ITGA1/ANO1/EPHA4/IRAG1/ARC/TMTC4/GPM6B/VCAM1/RGS5/MYH11/C9orf116/CYP2J2/TBX3
KEGG_DRUG_METABOLISM_CYTOCHROME_P450	KEGG_DRUG_METABOLISM_CYTOCHROME_P450	62	-0.349508	-1.36201	0.0356844	tags=24%, list=12%, signal=21%	UGT2B17/CYP2D6/GSTA5/CYP2C19/MAOA/GSTA1/UGT2B7/UGT1A6/GSTO2/UGT2B11/CYP2A13/CYP3A43/UGT2B10/ALDH1A3/GSTZ1
LI_WILMS_TUMOR_VS_FETAL_KIDNEY_1_UP	LI_WILMS_TUMOR_VS_FETAL_KIDNEY_1_UP	177	-0.306205	-1.36614	0.0131866	tags=38%, list=25%, signal=29%	MITF/CRYZ/SLC37A4/TPST1/CD2AP/TGFBR2/LRRC32/TOM1L1/DYNC2LI1/PDE8A/EFR3A/SERPINF1/PRNP/IFIT1/SMPDL3A/KIFC3/AKR1C3/TGOLN2/MPC2/LYN/ACSM3/LAMP2/DST/REEP5/SEMA3C/VEGFA/CARD10/SLC35A3/SYNGR2/CPVL/GPRC5B/S100A10/AMOTL2/TMED5/CTSO/NCOA3/PGRMC2/ANGPT1/FUCA1/GNG12/GLUD2/MYOF/MATN2/ASAH1/ANXA3/APOM/PMP22/HPN/CLU/UGCG/CAV2/ANK3/CTSH/SDHD/MXRA8/MSMO1/ACSL1/ALDH6A1/IL10RB/RIDA/RAB22A/PATZ1/ACOT2/OXCT1/CAST/CL…
DESERT_PERIPORTAL_HEPATOCELLULAR_CARCINOMA_SUBCLASS_UP	DESERT_PERIPORTAL_HEPATOCELLULAR_CARCINOMA_SUBCLASS_UP	147	-0.314772	-1.38348	0.0141943	tags=31%, list=21%, signal=25%	LRRC20/PCK1/OTC/ADRA1A/DHRS1/ALDH2/ABCA8/PLG/CTH/ACSM3/NR1I2/EPHX2/ABCB4/SCGN/LGALS4/SORL1/ABCA6/GNB5/EHHADH/ANO1/FAM149A/SPP2/PPP2R1B/HAO2/CRHBP/GPN3/CPS1/RGN/AKR1D1/GSTA1/LRRC31/GPR37/SLC10A1/ACSL1/RIDA/CYFIP2/FXYD1/CYP3A43/ZGPAT/CYP2J2/GBA3/GSTZ1/MASP2/ABAT/PBLD/ASS1
REACTOME_MITOCHONDRIAL_TRANSLATION	REACTOME_MITOCHONDRIAL_TRANSLATION	89	-0.33941	-1.385	0.0199931	tags=28%, list=18%, signal=23%	MRPL11/MRPL21/MRPL33/MRPL22/MRPL46/MRPS18C/MRPL15/MRPS11/MRPL39/MRPL1/MRPS25/MRPL3/MRPL52/MRPS26/MRPL40/MRPL10/MRPS21/AURKAIP1/MRPS12/MRPS14/MRPS33/MRPL20/MRPS36/MRPL47/MRPS18A
MORI_MATURE_B_LYMPHOCYTE_DN	MORI_MATURE_B_LYMPHOCYTE_DN	73	-0.347053	-1.38508	0.0423347	tags=37%, list=24%, signal=28%	RAG1/SMARCA4/SNRPC/NOTCH1/COX7A2/CDKN3/LXN/CCNB2/RNASEH2B/NDUFC1/HES6/CDC45/UFC1/CYCS/GPAM/PSMD8/PRDX4/HMGB2/EZH2/NEK2/BRCA1/MARCKS/STMN1/PSMC1/PLA2G12A/CDC25C/RGS2
RAO_BOUND_BY_SALL4_ISOFORM_A	RAO_BOUND_BY_SALL4_ISOFORM_A	175	-0.312077	-1.38635	0.00361732	tags=30%, list=21%, signal=24%	C1orf43/TMPRSS11B/CYP2R1/ABCA1/OR6B2/MRPL13/OR8K3/DNAJB4/COMMD3/ADAM10/REEP5/FBXL21P/ACMSD/NEDD4/CANX/ECHDC1/MFF/UGP2/LMNA/NFAT5/SACM1L/TNFRSF1B/OR5AS1/SERPINB4/MBLAC1/GNG12/RBP4/SLC22A9/HSPB3/ARMC3/MAPT/ZNF780A/LRRN1/PCDH11X/PHKB/PTGS2/PRG4/ANK3/PLCB4/PLPP6/MLH1/MARCHF8/IDH3B/C6orf58/OR4K15/DUS2/CHST4/SEPTIN7/CDH8/VSTM2A/CDKN2A/MAEA
REACTOME_G1_S_DNA_DAMAGE_CHECKPOINTS	REACTOME_G1_S_DNA_DAMAGE_CHECKPOINTS	64	-0.35519	-1.38654	0.028875	tags=22%, list=11%, signal=20%	PSMD8/PSMB10/PSMA2/CDK2/CDKN1B/PSME1/PCBP4/COP1/PSMA1/PSMA6/PSMC6/PSMC1/CDKN2A/PSMC4
LIM_MAMMARY_STEM_CELL_DN	LIM_MAMMARY_STEM_CELL_DN	382	-0.281797	-1.39	0.000684862	tags=28%, list=19%, signal=23%	REEP6/MAPK9/RNASEH2B/SLC37A1/SLC44A4/RRM2B/LRRC26/CPT2/NCOA2/BOLA1/UROS/TMEM62/DECR2/PEX11G/ANKRA2/HDHD3/ACOT4/TST/CORO2A/PPM1H/SORL1/SLC35A3/ARHGEF16/IVD/TSPAN17/SPINT1/KLHL5/EHHADH/ANXA7/DMBT1/SERINC3/GOLM1/ERBB3/NUP37/EPB41/NEU1/TMEM128/TJP3/RAB25/HCAR3/SNX14/TMEM135/TSG101/POMT1/DHX32/ISG20/LIPH/COASY/GCA/TMEM158/NIPSNAP2/ERBB2/PGAP3/ALDH5A1/ZNF750/GET1/HPN/SHMT1/PSME1/CHURC1/SULF2/ANO9/MRPS2…
BROWNE_HCMV_INFECTION_24HR_DN	BROWNE_HCMV_INFECTION_24HR_DN	135	-0.320269	-1.39279	0.017971	tags=46%, list=31%, signal=32%	MTMR11/LINC00461/COL5A2/COL8A1/ANXA4/SLC16A2/RIN2/OLFML1/DRD3/SUCLG2/CD59/ABCC1/TRAPPC12/S100A4/BST1/LAMA4/CDKN1A/RECK/GDF10/TGFBR2/UBB/BTN3A3/SSH1/GRIA3/BLK/FBN2/ABCA8/ACSM3/UROS/DST/HOXA9/SEMA3C/KCNMA1/ECI1/MEST/CROCC/HOXA11/PKLR/S100A10/GJA4/FIG4/CTSO/LGALS3/PRIM2/ANGPT1/FDPS/CPS1/GPR176/IGFBP3/VWA5A/ERCC2/ACTA2/SEPTIN11/IFITM1/B2M/BNIP3L/TAF1B/SSPN/TMEM187/SLC14A1/CCNG1/NR1H3
ZHANG_RESPONSE_TO_CANTHARIDIN_DN	ZHANG_RESPONSE_TO_CANTHARIDIN_DN	64	-0.357753	-1.39654	0.0269371	tags=31%, list=17%, signal=26%	HARS2/ZNF200/TIMM17B/TUBG1/FABP5/GTF3A/RPL4/PRIM1/MRPL3/EEF1D/ZFYVE26/ABCC4/ERCC2/RPL29/RHOC/RPSA/MCM7/HADHA/FANCG/PGAM1
MANNE_COVID19_ICU_VS_HEALTHY_DONOR_PLATELETS_DN	MANNE_COVID19_ICU_VS_HEALTHY_DONOR_PLATELETS_DN	145	-0.318507	-1.40134	0.0116655	tags=23%, list=16%, signal=20%	DYTN/CPAMD8/PLD4/TNFSF18/AVPR1A/PLCB1/COL25A1/CLIC5/HLA-DRA/DLK1/KCND3/CAVIN2/STRBP/TTC30A/YAP1/LILRA4/NXT2/CCDC50/APCDD1L/ALG1L2/MAPK10/MAGOHB/MS4A7/DENND11/DCK/CAAP1/MLH3/DNAH12/PID1/TFPI2/TBX3/NLGN1/LEPR/SEPTIN10
DER_IFN_ALPHA_RESPONSE_UP	DER_IFN_ALPHA_RESPONSE_UP	71	-0.355263	-1.40555	0.0297247	tags=27%, list=12%, signal=24%	OASL/CYCS/XRCC6/PSMB10/STAT1/RHOC/PSME1/IFITM1/B2M/RBBP4/TRIM14/LIPA/SRP9/TAP1/BST2/SP110/TEAD4/IRF1/CASP8
OHGUCHI_LIVER_HNF4A_TARGETS_DN	OHGUCHI_LIVER_HNF4A_TARGETS_DN	150	-0.319953	-1.41106	0.00653232	tags=22%, list=14%, signal=19%	ERBB3/NUDT7/ENHO/SPP2/S100A10/SLC23A1/KYAT1/ENTPD8/CYP2D6/AADAT/SLC3A1/F13B/SERPINA1/SLCO2B1/SLC22A9/APOM/CMAHP/F12/APOA4/ASPDH/CTSH/TMC7/ETHE1/CYP4V2/TPMT/ALAS2/SOAT2/PDZK1/TFPI2/PCYT2/LIPC/ABAT/ABCC6
BREDEMEYER_RAG_SIGNALING_NOT_VIA_ATM_DN	BREDEMEYER_RAG_SIGNALING_NOT_VIA_ATM_DN	52	-0.379907	-1.41239	0.0323632	tags=33%, list=20%, signal=26%	KLRD1/ABCA1/OSR2/TRIM5/IMP4/TMEM100/SMURF1/CRLF1/HLA-DRA/CACNA1H/SLPI/RIOK3/PCBP4/NAV2/ASPH/SNX10/GFOD1
MIKKELSEN_ES_LCP_WITH_H3K4ME3	MIKKELSEN_ES_LCP_WITH_H3K4ME3	124	-0.3279	-1.41469	0.0201325	tags=27%, list=17%, signal=23%	OPRK1/SPI1/C6orf118/IL17RE/TNS2/PKLR/GPR20/RAB25/RHBDF2/DLGAP3/CD68/TAPBPL/ENO3/VWA5A/TIMP4/VWA3A/GLRX/EMILIN1/IFITM1/MRPS21/ASPDH/CD79B/EXOC3L1/SOAT2/SIPA1L3/CYSRT1/KCNIP3/HEXIM2/PRR15L/CYP2J2/SPEF2/MASP2/DDR1/STYXL2
MADAN_DPPA4_TARGETS	MADAN_DPPA4_TARGETS	54	-0.374431	-1.41741	0.0408675	tags=43%, list=28%, signal=31%	DNAJC6/TEK/TEX19/TIMM8A/SYCE1/IQCG/DDX4/GAD1/GPX2/PRPF39/SNAP91/AP1S3/DAZL/HORMAD1/MYO1F/MLLT6/SNTB1/ACOT1/FAM183A/SERPINB6/CA4/REC114/HOOK1
KAUFFMANN_MELANOMA_RELAPSE_UP	KAUFFMANN_MELANOMA_RELAPSE_UP	57	-0.372713	-1.41892	0.0342687	tags=30%, list=16%, signal=25%	PTTG1/CDC45/FANCD2/RFC2/TOP2A/EXO1/RAD18/SUMO1/RAD51AP1/RFC4/LAMTOR5/MCM7/CTBP2/BRCA1/DCLRE1A/NEIL3/FANCG
CHEN_LIVER_METABOLISM_QTL_CIS	CHEN_LIVER_METABOLISM_QTL_CIS	83	-0.35071	-1.42186	0.0196797	tags=28%, list=17%, signal=23%	HES6/CDH19/CD244/NAV1/IVNS1ABP/PPOX/APOA2/FAM20B/PIGN/RPS6KC1/CYB5R1/F11R/LAD1/PRG4/RGS5/DCAF8/DUSP23/NENF/NME7/MRPS14/PIGM/CEP170/TSEN15
REACTOME_STABILIZATION_OF_P53	REACTOME_STABILIZATION_OF_P53	53	-0.377717	-1.42211	0.0493619	tags=21%, list=11%, signal=19%	PSMD8/PSMB10/PSMA2/PSME1/COP1/PSMA1/PSMA6/PSMC6/PSMC1/CDKN2A/PSMC4
GAVIN_FOXP3_TARGETS_CLUSTER_T7	GAVIN_FOXP3_TARGETS_CLUSTER_T7	99	-0.340935	-1.43517	0.0178933	tags=26%, list=19%, signal=21%	MCM6/HNRNPF/SAR1A/REEP5/EIF3M/JAK1/MRPL46/PPM1M/CHCHD2/UGP2/USE1/RAC2/CD47/MTMR9/RPL10/STAT1/RPL18/GSTA1/CD24/BCL2L11/MARCKS/RAP1GDS1/CAST/KLHDC2/RPS7/RPL32
REACTOME_APOPTOTIC_EXECUTION_PHASE	REACTOME_APOPTOTIC_EXECUTION_PHASE	52	-0.386917	-1.43845	0.0253868	tags=33%, list=15%, signal=28%	CLSPN/BMX/BIRC2/LMNA/ROCK1/DSG2/DNM1L/MAPT/APC/HMGB2/GAS2/DBNL/TJP2/FNTA/CASP6/CASP3/CASP8
LEE_LIVER_CANCER_DENA_DN	LEE_LIVER_CANCER_DENA_DN	73	-0.360568	-1.43902	0.0285436	tags=30%, list=21%, signal=24%	PCK1/OTC/LACTB2/CPT2/ACSM3/EPHX2/SELENBP1/PLA2G1B/MYH1/EHHADH/CSAD/DMBT1/CA3/PHYH/RGN/RORC/GPR37/ACSL1/NR1H3/ALDH3A2/LIPC/KRT4
STARK_PREFRONTAL_CORTEX_22Q11_DELETION_DN	STARK_PREFRONTAL_CORTEX_22Q11_DELETION_DN	488	-0.287203	-1.43946	8.60627e-05	tags=31%, list=21%, signal=25%	PDHB/TRIM59/RANBP1/COX7A2/NMT2/TMEM59L/ATP5PO/LEPROTL1/SLC25A20/BCAP29/CYHR1/TTC33/TMA7/SS18L2/ELOC/PFDN2/TMEM256/ATP5MF/WDR17/ATOX1/MPC2/SLITRK4/RPL36A/LYSMD4/SPSB3/C9orf72/SMIM4/ZDHHC16/NDUFA8/MRPL11/C9orf85/UQCR10/KPNA2/ST13/NDUFS7/TLN1/TST/NME1-NME2/MKKS/MTLN/DCTN6/UQCRC2/MRPL15/TMEM126A/IDH1/TUBG1/MRPS11/DCAF11/TRMT2A/SNX32/INIP/UFC1/PPM1L/EIF3F/SNX7/NAGK/FAM162A/AKR1A1/FKBP3/MLLT6/PPP2R5C/U…
DOANE_BREAST_CANCER_ESR1_UP	DOANE_BREAST_CANCER_ESR1_UP	104	-0.340301	-1.44636	0.0107361	tags=34%, list=21%, signal=27%	ANXA9/AGR2/KCNE4/INPP4B/MYO6/SLC44A4/EPS8L1/TNNT1/CYBRD1/SEMA3C/CELSR1/CFD/SELENBP1/RET/TSPAN1/TMC5/TJP3/IFT74/RND1/SCUBE2/TFF1/CLGN/MAPT/UGCG/GALNT7/ARMT1/SLC16A6/C9orf116/SLC7A8/PDZK1/KRT18/DNAJC12/PRR36/DNALI1/ABAT
REACTOME_PEROXISOMAL_PROTEIN_IMPORT	REACTOME_PEROXISOMAL_PROTEIN_IMPORT	61	-0.373691	-1.44749	0.024287	tags=34%, list=18%, signal=28%	PECR/UBB/ACAA1/MLYCD/DECR2/EPHX2/ACOT4/UBE2D2/IDH1/EHHADH/NUDT7/UBE2D3/HAO2/PHYH/HMGCL/CAT/NOS2/ACOT2/HACL1/PEX10/DAO
YAGI_AML_FAB_MARKERS	YAGI_AML_FAB_MARKERS	179	-0.325423	-1.44903	0.00381563	tags=29%, list=19%, signal=24%	ADAMTS3/CD58/GAD1/HOXA9/PKIG/MRPL33/SC5D/TFDP2/LARS2/DDHD2/PLOD2/SORL1/USP8/PLA2G6/SERPINI1/TPM1/S100A10/GJA4/AP1S2/TPST2/RAB27B/HDGFL3/CD68/FAM20B/TNFRSF1B/GOSR2/CD180/PAQR3/ALDH5A1/NUP50/ITGB3/VCL/VPS13A/NR4A2/CD200/UNC119/RFC4/GIT2/NAP1L3/ITSN2/TMSB15A/TJP2/IL10RB/ZBTB16/PDCD10/CAST/PKIA/NLRP3/GGH/CDC42BPA/NAE1/ANXA2
REACTOME_TRANSPORT_OF_MATURE_TRANSCRIPT_TO_CYTOPLASM	REACTOME_TRANSPORT_OF_MATURE_TRANSCRIPT_TO_CYTOPLASM	80	-0.356083	-1.44925	0.0152168	tags=26%, list=9%, signal=24%	NUP54/SRSF5/NUP98/NUP37/U2AF1L4/NUP50/EIF4E/FYTTD1/RAE1/MAGOHB/RNPS1/SRSF6/ZC3H11A/SRSF3/WDR33/SRSF7/POM121C/NUP155/THOC5/CPSF1/RBM8A
VARELA_ZMPSTE24_TARGETS_DN	VARELA_ZMPSTE24_TARGETS_DN	36	-0.416345	-1.44969	0.0478044	tags=42%, list=21%, signal=33%	OTC/OSTC/REEP6/C11orf54/CPT2/EHHADH/IFI27/S100A10/CA3/RGN/LYZ/CAT/NOCT/ALDH3A2/PDZK1
TAVOR_CEBPA_TARGETS_UP	TAVOR_CEBPA_TARGETS_UP	48	-0.396597	-1.45199	0.0467136	tags=31%, list=15%, signal=27%	GBP1/SERPINI1/HCAR3/FIG4/TANK/MLC1/ARC/VCL/CCND2/AKAP12/ACSL1/BCL2A1/RGS2/GGH/ID2
JINESH_BLEBBISHIELD_VS_LIVE_CONTROL_DN	JINESH_BLEBBISHIELD_VS_LIVE_CONTROL_DN	262	-0.31205	-1.45933	0.000681708	tags=24%, list=15%, signal=20%	MX1/METTL1/KIF20A/IFI27/STARD5/HLA-DRA/RAB27B/SLC7A2/ANXA2P1/OASL/AMOT/QPCT/RAB32/GNG12/TMEM158/CDKN2C/SPRR3/TCEAL8/PET100/TMTC4/IFIT2/RPS29/F11R/VGLL4/PHF11/CHMP2B/ANTXR1/SYT7/GBP2/CAT/KIFAP3/PARP4/DUSP23/C1orf116/DENND11/IFI44L/HNRNPA3/CLDN23/ILF3/C3orf14/PMPCB/RPL14/PIGM/SP110/XAF1/C3/C15orf48/TPK1/LYPLAL1/GPHN/SRSF7/FERMT1/SPRR1A/SLC4A4/CASP4/HMMR/TXNIP/SMAD6/ASS1/SQOR/RPS7/ANXA2
KEGG_PROTEASOME	KEGG_PROTEASOME	43	-0.407978	-1.46479	0.0480958	tags=21%, list=11%, signal=19%	PSMD8/PSMB10/PSMA2/PSME1/PSMA1/PSMA6/PSMC6/PSMC1/PSMC4
MILI_PSEUDOPODIA_HAPTOTAXIS_UP	MILI_PSEUDOPODIA_HAPTOTAXIS_UP	481	-0.292498	-1.46836	3.95943e-05	tags=30%, list=20%, signal=25%	PJA2/TTC33/ZNRF2/GULP1/HDAC2/GPATCH4/MRPL13/SS18L2/ZRANB2/FAR1/PPP1CB/FBXO32/DNAJB4/ZDHHC2/TRIM44/PDK1/NCOA2/PPHLN1/HNRNPK/RNF138/C9orf85/TBC1D12/QKI/COPS2/CAMK2D/ACTR2/ST13/CFAP97/UBE2D2/TRAPPC8/MRPS18C/TMEM263/RPS20/KCTD10/CFL2/NUP54/ANKRD13C/LZTFL1/HIF1A/BZW1/RSPRY1/RWDD1/CNOT2/TIGD2/CLOCK/IVNS1ABP/PAFAH1B1/NUDCD2/CETN3/OXR1/BTF3L4/GTF3C6/MFF/FKBP3/UBE2D3/UGP2/CSTF2/CAVIN2/PAIP1/STRBP/PRIM1/HD…
WP_GENES_RELATED_TO_PRIMARY_CILIUM_DEVELOPMENT_BASED_ON_CRISPR	WP_GENES_RELATED_TO_PRIMARY_CILIUM_DEVELOPMENT_BASED_ON_CRISPR	95	-0.353758	-1.46937	0.00888241	tags=29%, list=18%, signal=24%	IFT52/DYNLT1/KIF3B/MKKS/CILK1/EVC2/LZTFL1/TTC30B/FBF1/CEP192/RPGRIP1L/TMEM216/TCTN3/PIBF1/IFT74/TCTN1/HSPB11/TXNDC15/TTC26/TRAPPC11/BBS4/TTC8/CPLANE2/KIFAP3/KATNB1/MIB1/BBS2/RABL2A
REACTOME_NICOTINATE_METABOLISM	REACTOME_NICOTINATE_METABOLISM	26	-0.457956	-1.47753	0.0477572	tags=23%, list=10%, signal=21%	NMNAT3/NAPRT/PTGS2/PARP4/PARP10/NAMPT
BROWNE_HCMV_INFECTION_20HR_DN	BROWNE_HCMV_INFECTION_20HR_DN	96	-0.355124	-1.47949	0.00727657	tags=30%, list=18%, signal=25%	DST/CAP2/PKIG/SYNE1/ME3/NQO1/TRAF3IP2/SYT11/ANXA2P1/FILIP1L/SLC22A4/HMBS/PDE4B/VPS41/TMEM158/SERPINB2/GLRX/VCL/PMP22/SEPTIN11/BBS4/ETHE1/DNASE1L1/CCN2/ALDH6A1/CHMP2A/ADD3/HMMR/ANXA2
ACEVEDO_NORMAL_TISSUE_ADJACENT_TO_LIVER_TUMOR_UP	ACEVEDO_NORMAL_TISSUE_ADJACENT_TO_LIVER_TUMOR_UP	159	-0.336503	-1.48514	0.0018993	tags=23%, list=14%, signal=20%	SUMO2/RAB33B/FAM162A/GTF3C6/CTSO/PCTP/YAP1/IFT74/SACM1L/IDO2/ERGIC2/DPP4/NUCKS1/RPLP1/HNRNPA2B1/WSB2/PTMA/SLPI/APOM/SEPTIN11/PIK3AP1/F11R/LAP3/ADPRM/RBM5/GNA13/RPL7A/HHEX/RPL14/MINDY3/MARCKS/FGL1/RPL7/RGS2/RPS3A/EDEM2/BLVRB
RADAEVA_RESPONSE_TO_IFNA1_UP	RADAEVA_RESPONSE_TO_IFNA1_UP	46	-0.404948	-1.4873	0.0256845	tags=33%, list=15%, signal=28%	MX1/IFI27/RFC2/UBE2D3/STAT1/CDKN1B/PSME1/IFITM1/VCAM1/IFI44L/KLK3/BRCA1/BST2/IRF1/CASP3
WELCSH_BRCA1_TARGETS_UP	WELCSH_BRCA1_TARGETS_UP	190	-0.330135	-1.49057	0.00164362	tags=39%, list=27%, signal=29%	PPP4C/RAB7A/HDAC1/GUCY1B1/ATXN10/RAB2A/TUBB3/TAF12/RAB1A/MAT2A/KLHDC3/CDKN1A/WWP1/TCEAL1/CKS2/TSNAX/PTCRA/CITED2/ID4/RAB8A/ATP5PB/TM9SF2/KCNK1/LUM/COPS2/PGRMC1/MFGE8/JAK1/CD46/IDH1/PPIC/SRSF5/ANXA7/ITGA1/SERINC3/CD9/SEC23A/TOP2A/UBE2D3/PPP2R5C/NEU1/PRKAR1A/CSNK1A1/TSG101/QPCT/MGAT2/TMPO/CREB1/CD47/CCT7/ACTA2/GET1/STAT1/RHOC/ADSS2/NDUFA12/B2M/HMGCL/CAT/KIFAP3/HSPA5/MLH1/LIPA/SRSF3/CTSL/TFPI2/ADD3/…
KEGG_VIRAL_MYOCARDITIS	KEGG_VIRAL_MYOCARDITIS	68	-0.377756	-1.49138	0.0230018	tags=32%, list=20%, signal=26%	ITGB2/ACTB/RAC1/HLA-DRB5/HLA-DMA/ICAM1/MYH1/HLA-DRA/CYCS/HLA-DOB/RAC2/HLA-DRB4/CD86/MYH11/DMD/CD28/FYN/ACTG1/CASP3/CASP8/EIF4G2/LAMA2
MIKKELSEN_MEF_LCP_WITH_H3K27ME3	MIKKELSEN_MEF_LCP_WITH_H3K27ME3	64	-0.383134	-1.49562	0.0097385	tags=28%, list=17%, signal=23%	FNDC8/IL17RE/SLC16A8/CDH7/PKLR/MYO1F/ENTPD8/PLCB2/STRA6/HAPLN2/PLCD4/LHX4/CARD14/TRPM2/KCNIP3/PRR15L/ADAMTSL2/ABCG5
GUTIERREZ_MULTIPLE_MYELOMA_UP	GUTIERREZ_MULTIPLE_MYELOMA_UP	34	-0.436105	-1.49988	0.0401167	tags=47%, list=18%, signal=39%	SUCLG2/COX7C/ANKHD1/ARF1/SSR3/HNRNPK/CANX/MX1/UQCRFS1/CD47/CNIH1/CSDE1/VDAC1/SEPTIN10/PTP4A1/SELENOT
VANTVEER_BREAST_CANCER_BRCA1_DN	VANTVEER_BREAST_CANCER_BRCA1_DN	37	-0.429722	-1.50767	0.0421837	tags=41%, list=19%, signal=33%	GLI3/VEZF1/ANKRD50/RPL23A/TPPP3/ECI1/NQO1/GOLM1/CSNK1A1/HDGFL3/DKK3/UNC119/PRKD1/FAM110C/DNALI1
MOREAUX_MULTIPLE_MYELOMA_BY_TACI_DN	MOREAUX_MULTIPLE_MYELOMA_BY_TACI_DN	168	-0.340125	-1.50848	0.0015433	tags=36%, list=24%, signal=28%	CHCHD1/SMARCA4/HIKESHI/TMEM267/NOL8/MRPL43/ACTR6/GEMIN5/ANKRD49/CYP2R1/CEP57/NNT/SLC33A1/EBNA1BP2/C11orf54/C1orf131/EIF3M/EOGT/PPIP5K2/DBF4/TMEM126A/SLC25A36/SGO2/MALSU1/IARS1/NUDCD2/PAAF1/PPP2R5C/PAIP1/MINPP1/IP6K2/DNAJB14/FEM1B/IFT74/TMEM135/PSMD8/UPF3A/CBWD1/YJU2/LSM5/ANAPC10/CHMP4A/TMEM165/LAP3/GPR89B/EZH2/GCSH/FANCL/MRPS12/ZNF277/ILF3/RPL26L1/MINDY3/BTBD1/OTUD6B/ERCC1/RIOX2/PSMC4/TDP2/MATR3
ZHAN_MULTIPLE_MYELOMA_MS_DN	ZHAN_MULTIPLE_MYELOMA_MS_DN	42	-0.420504	-1.5088	0.0386924	tags=40%, list=23%, signal=31%	CLTA/HIKESHI/DHPS/ANKRD49/GPALPP1/TMEM126A/TAF1D/ZDHHC14/MTURN/ARHGEF12/RPS2/NAPRT/APOL1/SLC16A6/MSANTD4/ICAM4/MOB3A
GALE_APL_WITH_FLT3_MUTATED_UP	GALE_APL_WITH_FLT3_MUTATED_UP	56	-0.396823	-1.51169	0.0142476	tags=50%, list=30%, signal=35%	HEATR1/LANCL1/MTMR1/FANCI/TRMT61B/TCF12/ABCC1/GIMAP6/SRSF11/TTK/ATF6/PSMF1/MIS12/NSL1/LARS2/BOLA2/INPP5F/GEMIN4/CSNK1A1/WIPF1/UPF3A/DHX15/TRMT11/PHF11/RNF144A/NSUN5/CDC16/LYPLA1
TIEN_INTESTINE_PROBIOTICS_6HR_UP	TIEN_INTESTINE_PROBIOTICS_6HR_UP	49	-0.408298	-1.51527	0.0179903	tags=41%, list=25%, signal=31%	RAB2A/CRCP/RPS19/TPT1/ALDH3B1/PRNP/HSPA1A/ACTB/RPL23A/SORL1/RPL4/NAP1L1/RPS6/RPS2/B2M/RPLP0/EEF1A1/RPS27/RPS3A/RPS7
WIELAND_UP_BY_HBV_INFECTION	WIELAND_UP_BY_HBV_INFECTION	93	-0.369095	-1.52194	0.0057711	tags=47%, list=26%, signal=35%	HLA-DPB1/RAB31/PSMB9/FCER1G/IFI16/PBK/CXCL10/CXCR4/UBE2L6/BTN3A3/LAPTM5/GZMK/FCGR1A/MCM6/CD53/UBE2C/KPNA2/HLA-DMA/PTTG1/SRGN/GBP1/IFI27/RAB27A/S100A10/HLA-DRA/VSIG4/LGALS3/ISG20/RAC2/PSMB10/CD3D/CTSC/STAT1/PSME1/LYZ/GPNMB/B2M/RNASET2/LAP3/GBP2/SP110/ARHGDIB/ADA2/PLAC8
MAYBURD_RESPONSE_TO_L663536_DN	MAYBURD_RESPONSE_TO_L663536_DN	50	-0.411823	-1.52801	0.0275994	tags=30%, list=16%, signal=25%	CPE/CCZ1/ZNF585A/CYCS/GNPDA2/TMTC4/SLC30A5/CCNC/CSTF3/PPA2/SNX10/SRSF7/SNX5/HMMR/SELENOT
HOLLEMAN_ASPARAGINASE_RESISTANCE_B_ALL_UP	HOLLEMAN_ASPARAGINASE_RESISTANCE_B_ALL_UP	26	-0.474699	-1.53155	0.0311535	tags=23%, list=5%, signal=22%	RPL4/RPL7A/BCR/RPLP0/RPL6/EEF1B2
REACTOME_MITOCHONDRIAL_IRON_SULFUR_CLUSTER_BIOGENESIS	REACTOME_MITOCHONDRIAL_IRON_SULFUR_CLUSTER_BIOGENESIS	11	-0.608897	-1.53295	0.0413454	tags=73%, list=30%, signal=51%	FDX2/SLC25A28/GLRX5/ISCU/NFS1/ISCA2/FDXR/FXN
KAYO_AGING_MUSCLE_DN	KAYO_AGING_MUSCLE_DN	116	-0.359617	-1.533	0.00512763	tags=46%, list=29%, signal=33%	MARF1/POLR2G/SDHB/ALDH9A1/BCL2L2/DRD3/FH/RPS18/ZMYND8/GTF3C2/TMSB10/IFI16/MDH1/AIMP1/ELL2/ATP5MC3/KLK6/UBB/ADH1A/COX6A1/FKBP1B/HOXC5/RPL31/ELOC/DNTTIP2/DYNLT1/UBE2D2/ACP1/LGALS4/TPM1/SERINC3/RPS25/RBMY1A1/PPP2R5C/UGP2/NEU1/RPL36AL/LGALS3/DPP4/ATP5F1C/LNPEP/PARG/CTSH/ZNF274/PSMA6/MUC2/HADH/RTF1/CDC16/TFPI2/ICA1/CASP4/RPS7
REACTOME_SYNTHESIS_SECRETION_AND_DEACYLATION_OF_GHRELIN	REACTOME_SYNTHESIS_SECRETION_AND_DEACYLATION_OF_GHRELIN	19	-0.526592	-1.53303	0.0315437	tags=26%, list=12%, signal=23%	GCG/CRHR2/PLA2G7/SPCS2/BCHE
GARGALOVIC_RESPONSE_TO_OXIDIZED_PHOSPHOLIPIDS_BLUE_DN	GARGALOVIC_RESPONSE_TO_OXIDIZED_PHOSPHOLIPIDS_BLUE_DN	57	-0.402779	-1.53338	0.0127633	tags=35%, list=17%, signal=29%	FAN1/GDPD1/FBXL15/CSTF2T/PTCD2/HEATR6/GPAM/SOX7/TNFRSF1B/VWA5A/BMP2K/GSPT2/SIX5/AGGF1/LIPT1/PRMT6/SUOX/PATZ1/HILPDA/CASP8
REACTOME_METABOLISM_OF_PORPHYRINS	REACTOME_METABOLISM_OF_PORPHYRINS	25	-0.487184	-1.54372	0.0315798	tags=32%, list=14%, signal=28%	PPOX/HMBS/HMOX2/SLCO2B1/COX10/GSTA1/ALAS2/BLVRB
OZANNE_AP1_TARGETS_UP	OZANNE_AP1_TARGETS_UP	13	-0.587816	-1.54373	0.0450331	tags=38%, list=12%, signal=34%	LGALS3/ARPC1B/KLHL41/CTSL/STAT6
REACTOME_INTERLEUKIN_12_SIGNALING	REACTOME_INTERLEUKIN_12_SIGNALING	45	-0.424576	-1.54377	0.0119664	tags=33%, list=19%, signal=27%	CNN2/RAP1B/HNRNPF/JAK1/BOLA2/CDC42/TYK2/HNRNPA2B1/SERPINB2/HNRNPDL/PITPNA/RPLP0/CAPZA1/TCP1/ANXA2
REACTOME_RNA_POLYMERASE_II_TRANSCRIPTION_TERMINATION	REACTOME_RNA_POLYMERASE_II_TRANSCRIPTION_TERMINATION	62	-0.396417	-1.54481	0.00703858	tags=31%, list=15%, signal=26%	CSTF2T/SRSF5/CSTF2/NUDT21/U2AF1L4/ZNF473/FYTTD1/CSTF1/MAGOHB/RNPS1/CSTF3/SRSF6/ZC3H11A/SRSF3/WDR33/SRSF7/THOC5/CPSF1/RBM8A
JIANG_VHL_TARGETS	JIANG_VHL_TARGETS	85	-0.380206	-1.54576	0.00301206	tags=24%, list=12%, signal=21%	FBH1/SPG21/HSPB11/CDK2/PAQR3/CFAP298/SCARB2/MRPS36/RPLP0/RPL26L1/INF2/PATZ1/HILPDA/C1D/SLC3A2/AZIN1/IRF1/TBC1D13/VIRMA/BCL7B
REACTOME_GENE_AND_PROTEIN_EXPRESSION_BY_JAK_STAT_SIGNALING_AFTER_INTERLEUKIN_12_STIMULATION	REACTOME_GENE_AND_PROTEIN_EXPRESSION_BY_JAK_STAT_SIGNALING_AFTER_INTERLEUKIN_12_STIMULATION	37	-0.441736	-1.54982	0.0321099	tags=35%, list=19%, signal=28%	CNN2/RAP1B/HNRNPF/BOLA2/CDC42/HNRNPA2B1/SERPINB2/HNRNPDL/PITPNA/RPLP0/CAPZA1/TCP1/ANXA2
GOLUB_ALL_VS_AML_UP	GOLUB_ALL_VS_AML_UP	23	-0.500054	-1.55123	0.0300975	tags=26%, list=6%, signal=24%	CD79A/RBBP4/PSMA6/SRP9/CYFIP2/STMN1
VANDESLUIS_COMMD1_TARGETS_GROUP_4_UP	VANDESLUIS_COMMD1_TARGETS_GROUP_4_UP	17	-0.545999	-1.55592	0.0393598	tags=41%, list=12%, signal=36%	SLC2A1/TTR/NR6A1/EMB/CA4/APOM/KRT18
REACTOME_SIGNALING_BY_ROBO_RECEPTORS	REACTOME_SIGNALING_BY_ROBO_RECEPTORS	216	-0.337685	-1.55662	0.000375748	tags=30%, list=20%, signal=24%	RAC1/ELOC/CAP1/RPL36A/RPS4Y2/RPL10A/PSMD13/CAP2/PSMF1/RPS13/RPL23A/PABPC1/RPS20/ROBO1/CDC42/RPL17/RPS25/RPL4/RPL36AL/NRP1/PSMD8/UPF3A/RPS21/PSMB10/PSMA2/RPLP1/RPL9/RPL10/RPL29/RPS6/RPS2/PRKACB/GSPT2/RPL8/RPL18/PSME1/RPS29/MAGOHB/LHX4/PSMA1/PSMA6/RPS15A/RNPS1/RPSA/RPL7A/RPS26/RPS15/RPL26/RPLP0/RPL6/RPL26L1/RPL14/USP33/RPL7/PSMC6/PSMC1/RPL21/RPS27/PSMC4/RPS3A/RBM8A/RPS7/RPL32/RPL18A
YANG_BREAST_CANCER_ESR1_BULK_UP	YANG_BREAST_CANCER_ESR1_BULK_UP	25	-0.491342	-1.5569	0.0298156	tags=36%, list=18%, signal=30%	REEP5/CELSR1/TSPAN1/ABCG1/DALRD3/AGGF1/ARMT1/ACOT2/DNALI1
KEGG_O_GLYCAN_BIOSYNTHESIS	KEGG_O_GLYCAN_BIOSYNTHESIS	25	-0.491979	-1.55892	0.0287571	tags=52%, list=21%, signal=41%	GCNT3/GALNT11/GALNT14/B3GNT6/GALNT17/GALNTL6/ST3GAL2/GCNT4/GALNT8/GALNT7/GCNT1/C1GALT1C1/ST3GAL1
LANDIS_ERBB2_BREAST_TUMORS_65_DN	LANDIS_ERBB2_BREAST_TUMORS_65_DN	38	-0.442707	-1.56121	0.0226623	tags=39%, list=22%, signal=31%	DPT/PDE8A/ACAA1/CPT2/LUM/GPD2/CAVIN2/NRP1/GPAM/ACTA2/PHYH/PHLDB1/HADH/MARCKS/TSC22D1
CHEN_NEUROBLASTOMA_COPY_NUMBER_GAINS	CHEN_NEUROBLASTOMA_COPY_NUMBER_GAINS	46	-0.427793	-1.57121	0.0148313	tags=28%, list=14%, signal=24%	TH/CACNG3/IRAG1/DUT/LYVE1/TRIM23/MYT1L/RNF144A/TAF1B/NAV2/TPO/GALK2/RPS7
BIOCARTA_CASPASE_PATHWAY	BIOCARTA_CASPASE_PATHWAY	20	-0.527592	-1.57182	0.0392672	tags=40%, list=12%, signal=35%	BIRC2/LMNA/CASP10/CASP6/ARHGDIB/CASP4/CASP3/CASP8
STEINER_ERYTHROCYTE_MEMBRANE_GENES	STEINER_ERYTHROCYTE_MEMBRANE_GENES	14	-0.582462	-1.57331	0.0469833	tags=57%, list=20%, signal=46%	SPTB/ACTB/ANK1/EPB41/TMOD1/ADD2/TPM3/ADD3
ZHAN_MULTIPLE_MYELOMA_CD1_VS_CD2_UP	ZHAN_MULTIPLE_MYELOMA_CD1_VS_CD2_UP	62	-0.40397	-1.57424	0.00524354	tags=21%, list=9%, signal=19%	PCDH20/KIF21B/TPBG/ARMCX1/ATF5/LURAP1L/HADH/ITPRIPL2/NID2/DNAJC12/XPOT/NPAS3/ASS1
CHNG_MULTIPLE_MYELOMA_HYPERPLOID_UP	CHNG_MULTIPLE_MYELOMA_HYPERPLOID_UP	52	-0.423591	-1.57479	0.00849122	tags=25%, list=10%, signal=23%	RPLP1/RPL29/RPS6/RPL18/RPSA/RPL7A/RPS15/KLK3/RPL14/RPL21/HNRNPA1/EEF1B2/RPL32
IWANAGA_E2F1_TARGETS_INDUCED_BY_SERUM	IWANAGA_E2F1_TARGETS_INDUCED_BY_SERUM	23	-0.508974	-1.5789	0.0237612	tags=57%, list=20%, signal=45%	CEP57/FAM111A/PCGF5/CENPH/CLSPN/PIAS2/FIGNL1/RAD51AP1/MMUT/HMGB2/DEPDC7/HROB/GGH
MATZUK_MEIOTIC_AND_DNA_REPAIR	MATZUK_MEIOTIC_AND_DNA_REPAIR	37	-0.450475	-1.58048	0.0260109	tags=38%, list=10%, signal=34%	SGO2/GJA4/TOP3B/MOS/CDK2/ERCC2/SPO11/MLH1/FANCL/MLH3/ERCC1/SYCP2/FANCC/FANCG
WILLERT_WNT_SIGNALING	WILLERT_WNT_SIGNALING	20	-0.532816	-1.58739	0.0325616	tags=50%, list=27%, signal=36%	NSMAF/SLC2A1/VCAN/CITED2/UBE2D2/NCOA3/TNFRSF11B/CSTF1/ING1/ID2
SEIDEN_ONCOGENESIS_BY_MET	SEIDEN_ONCOGENESIS_BY_MET	82	-0.391558	-1.58819	0.00519708	tags=43%, list=22%, signal=33%	PDE8A/HAT1/SUB1/UBA2/TMX1/PPP1CB/GNAI3/COMMD3/NSA2/PLOD2/CD46/F2RL1/AIDA/SEC23A/TAF1D/HIGD1A/NIPSNAP2/ARHGEF12/ANXA3/TCEA1/STAT1/CSDE1/IFITM1/RIOK3/CLIC4/MMADHC/HNRNPA3/EPS8/MSMO1/NCKAP1/LYPLA1/CAPZA1/SH3BGRL/ADAM9/COMMD8
TURASHVILI_BREAST_LOBULAR_CARCINOMA_VS_LOBULAR_NORMAL_UP	TURASHVILI_BREAST_LOBULAR_CARCINOMA_VS_LOBULAR_NORMAL_UP	91	-0.387775	-1.58901	0.00220901	tags=47%, list=28%, signal=34%	SFRP1/HAUS1/PIP/PAPOLA/TRIM29/MGST1/CD36/TRIM2/BORCS7/RAB1A/CRYZ/PGR/VPS35/TOM1L1/TM4SF18/ID4/LAMP2/DST/PI15/SORL1/PPP4R4/CYB5R2/ELF5/BHLHE41/CHL1/FBXO3/AMDHD1/SERPINA1/ACTA2/ANXA3/LYPD6/CNN1/GPM6B/MUC6/DERA/MYH11/DMD/PDZK1/GABRP/CYP2J2/KBTBD7/ZBTB16/LINC00472
BREDEMEYER_RAG_SIGNALING_NOT_VIA_ATM_UP	BREDEMEYER_RAG_SIGNALING_NOT_VIA_ATM_UP	62	-0.409894	-1.59733	0.00378403	tags=32%, list=16%, signal=27%	CD244/RCAN1/ZFP14/PJA1/SBSPON/PAIP1/RAB32/ADAT2/TXNDC15/TMOD4/CCR5/PIK3AP1/BLOC1S2/PCDH11X/PRELID2/C3orf14/EDARADD/JADE1/XAF1/SHFL
SESTO_RESPONSE_TO_UV_C6	SESTO_RESPONSE_TO_UV_C6	37	-0.45544	-1.5979	0.021347	tags=27%, list=12%, signal=24%	HMGN2/FDPS/XRCC6/DUT/TPBG/ARL4A/GALE/HNRNPA1/RGS2/TSC22D1
SANDERSON_PPARA_TARGETS	SANDERSON_PPARA_TARGETS	15	-0.578575	-1.60287	0.0304495	tags=73%, list=34%, signal=49%	ACADM/FGF21/HSD17B4/CPT1B/CD36/ETFDH/CPT2/DECR2/ECI1/EHHADH/ALDH3A2
REACTOME_ACETYLCHOLINE_BINDING_AND_DOWNSTREAM_EVENTS	REACTOME_ACETYLCHOLINE_BINDING_AND_DOWNSTREAM_EVENTS	12	-0.622325	-1.60337	0.0298869	tags=42%, list=16%, signal=35%	CHRND/CHRNA5/CHRNA9/CHRNB3/CHRNA2
REACTOME_CELLULAR_RESPONSE_TO_STARVATION	REACTOME_CELLULAR_RESPONSE_TO_STARVATION	151	-0.36472	-1.60427	0.00045603	tags=30%, list=18%, signal=25%	RPL36A/RPS4Y2/RPL10A/RPS13/RPL23A/FNIP2/RPS20/ATP6V1C1/RPL17/RPS25/ASNS/RPL4/RPL36AL/RPS21/RPLP1/RPL9/RPL10/RPL29/RPS6/RPS2/RPL8/RPL18/RPS29/LAMTOR1/RPS15A/SLC38A9/ATP6V1E2/RPSA/RPL7A/RPS26/LAMTOR5/RPS15/ITFG2/RPL26/RPLP0/RPL6/RPL26L1/RPL14/RPL7/NPRL2/RPL21/RPS27/RPS3A/RPS7/RPL32/RPL18A
KEGG_VALINE_LEUCINE_AND_ISOLEUCINE_BIOSYNTHESIS	KEGG_VALINE_LEUCINE_AND_ISOLEUCINE_BIOSYNTHESIS	11	-0.640258	-1.6119	0.0253313	tags=45%, list=21%, signal=36%	PDHB/LARS2/VARS2/IARS1/VARS1
WP_MITOCHONDRIAL_LCFATTY_ACID_BETAOXIDATION	WP_MITOCHONDRIAL_LCFATTY_ACID_BETAOXIDATION	14	-0.600223	-1.62129	0.0348044	tags=71%, list=27%, signal=52%	ACADVL/PECR/SLC25A20/CPT2/ECI1/EHHADH/ACSL3/HADH/HADHA/ACSL1
BOWIE_RESPONSE_TO_EXTRACELLULAR_MATRIX	BOWIE_RESPONSE_TO_EXTRACELLULAR_MATRIX	16	-0.574604	-1.62199	0.0272173	tags=69%, list=26%, signal=51%	PSMB9/IRF7/IFI16/OAS1/IFIT1/MX1/PSMB10/IFIT2/STAT1/IFITM1/IRF1
BILANGES_SERUM_AND_RAPAMYCIN_SENSITIVE_GENES	BILANGES_SERUM_AND_RAPAMYCIN_SENSITIVE_GENES	69	-0.411852	-1.6226	0.00453391	tags=30%, list=9%, signal=28%	EIF3F/RPS25/USE1/RPL4/RPL10/RPL29/RPS6/RPL8/RPL18/RPL7A/RPL26/RPL6/RPL14/RPL7/EEF1A1/RPL21/EEF1B2/RPS3A/RPS7/RPL32/RPL18A
WP_VITAMIN_B12_DISORDERS	WP_VITAMIN_B12_DISORDERS	12	-0.631336	-1.62659	0.0253953	tags=42%, list=12%, signal=37%	MTRR/MMUT/MMACHC/CBLIF/MMADHC
ITO_PTTG1_TARGETS_UP	ITO_PTTG1_TARGETS_UP	12	-0.631777	-1.62772	0.0253953	tags=50%, list=25%, signal=38%	CALU/AKR1C3/ST13/DKK3/GPNMB/UGT1A6
DEMAGALHAES_AGING_UP	DEMAGALHAES_AGING_UP	52	-0.438288	-1.62943	0.00465438	tags=29%, list=13%, signal=25%	SGK1/IL33/LGALS3/EFEMP1/ANXA3/LYZ/CLU/GPNMB/GSTA1/B2M/CLIC4/GBP2/S100A6/C3/TXNIP
REACTOME_FANCONI_ANEMIA_PATHWAY	REACTOME_FANCONI_ANEMIA_PATHWAY	34	-0.473878	-1.62979	0.0188809	tags=18%, list=5%, signal=17%	FANCL/ERCC1/DCLRE1A/FANCC/FANCG/FANCB
REACTOME_SYNTHESIS_OF_GLYCOSYLPHOSPHATIDYLINOSITOL_GPI	REACTOME_SYNTHESIS_OF_GLYCOSYLPHOSPHATIDYLINOSITOL_GPI	15	-0.595785	-1.65055	0.0198891	tags=47%, list=14%, signal=40%	PIGA/PIGN/PIGC/PIGV/PIGP/PIGM/PIGQ
CHOI_ATL_CHRONIC_VS_ACUTE_DN	CHOI_ATL_CHRONIC_VS_ACUTE_DN	19	-0.568282	-1.6544	0.0144388	tags=68%, list=25%, signal=51%	MDH1/ANAPC16/ATP6V1A/CGGBP1/IARS1/PPP1CC/GTF3A/NCOA3/SUMO1/CTDSP2/LBH/SPTBN1/MAT2B
ZHAN_VARIABLE_EARLY_DIFFERENTIATION_GENES_UP	ZHAN_VARIABLE_EARLY_DIFFERENTIATION_GENES_UP	16	-0.587727	-1.65904	0.0226519	tags=44%, list=10%, signal=39%	CD3E/BCLAF1/HOXB2/CUL7/BCR/CTSL/ANXA2
REACTOME_DEFECTS_IN_COBALAMIN_B12_METABOLISM	REACTOME_DEFECTS_IN_COBALAMIN_B12_METABOLISM	13	-0.632031	-1.65984	0.0188775	tags=46%, list=15%, signal=39%	ABCD4/MTRR/MMUT/MMACHC/CBLIF/MMADHC
REACTOME_APOPTOTIC_CLEAVAGE_OF_CELLULAR_PROTEINS	REACTOME_APOPTOTIC_CLEAVAGE_OF_CELLULAR_PROTEINS	38	-0.470983	-1.66093	0.00907634	tags=39%, list=15%, signal=34%	CLSPN/BMX/BIRC2/LMNA/ROCK1/DSG2/MAPT/APC/GAS2/DBNL/TJP2/FNTA/CASP6/CASP3/CASP8
BILANGES_RAPAMYCIN_SENSITIVE_VIA_TSC1_AND_TSC2	BILANGES_RAPAMYCIN_SENSITIVE_VIA_TSC1_AND_TSC2	67	-0.422117	-1.66313	0.00385504	tags=30%, list=12%, signal=26%	ZNF496/NAA10/NAP1L1/PRDX3/NUDT21/ACOT1/RPS21/SERPINB6/UQCRFS1/CNIH1/GTPBP6/PPM1G/RPS26/SLC25A3/VDAC1/PPIB/BCS1L/HNRNPA1/TCP1/BLVRB
SMID_BREAST_CANCER_RELAPSE_IN_LIVER_DN	SMID_BREAST_CANCER_RELAPSE_IN_LIVER_DN	10	-0.678148	-1.66491	0.0234907	tags=20%, list=2%, signal=20%	DNAJC12/DNALI1
KEGG_PROPANOATE_METABOLISM	KEGG_PROPANOATE_METABOLISM	29	-0.497959	-1.66568	0.0107443	tags=45%, list=21%, signal=36%	PCCB/MLYCD/ALDH2/LDHAL6B/LDHC/MCEE/EHHADH/MMUT/ACSS2/HADHA/ALDH6A1/ALDH3A2/ABAT
NOUZOVA_TRETINOIN_AND_H4_ACETYLATION	NOUZOVA_TRETINOIN_AND_H4_ACETYLATION	118	-0.388357	-1.6747	0.000684229	tags=29%, list=15%, signal=25%	SERPINI1/SERINC3/GORAB/ZBTB3/IP6K2/THRAP3/KRR1/SEC23B/GOSR2/RNF20/VPS41/MYOF/PNPT1/TRAPPC1/GOLT1B/RNPC3/BBS4/NELFE/CHMP2B/MARK2/PSMA6/SELENOK/MUL1/NME7/CYREN/MCTS1/PPP2R3C/DPH3/ERCC1/PSMC4/NUP155/PDCD10/MED7/ZNF222
REACTOME_INTERLEUKIN_12_FAMILY_SIGNALING	REACTOME_INTERLEUKIN_12_FAMILY_SIGNALING	52	-0.450651	-1.67539	0.00307907	tags=40%, list=21%, signal=32%	VAMP7/IL23A/CNN2/RAP1B/HNRNPF/IL6ST/JAK1/BOLA2/CANX/CDC42/CRLF1/TYK2/HNRNPA2B1/SERPINB2/STAT1/HNRNPDL/PITPNA/RPLP0/CAPZA1/TCP1/ANXA2
SEITZ_NEOPLASTIC_TRANSFORMATION_BY_8P_DELETION_UP	SEITZ_NEOPLASTIC_TRANSFORMATION_BY_8P_DELETION_UP	68	-0.425172	-1.67858	0.00278543	tags=46%, list=25%, signal=34%	ZFP36L2/CXCL10/ABCG2/OAS1/CCNE2/EFNB2/CH25H/IFIT1/IFI44/PTN/SORL1/IFIH1/GBP1/MX1/IFI27/TENT5A/OASL/ISG20/SPOCK1/TFF1/IFIT2/NR2F1/CLU/IFI44L/PDLIM5/PRR16/BCHE/ADAM28/ALDH1A3/PTGER4/ID2
WP_TYPE_III_INTERFERON_SIGNALING	WP_TYPE_III_INTERFERON_SIGNALING	10	-0.684031	-1.67935	0.0218248	tags=60%, list=17%, signal=50%	JAK1/TYK2/STAT2/STAT1/IL10RB/IFNL3
BIOCARTA_ACE2_PATHWAY	BIOCARTA_ACE2_PATHWAY	13	-0.639753	-1.68012	0.0158879	tags=23%, list=7%, signal=22%	AGT/AGTR1/AGTR2
REACTOME_CASPASE_MEDIATED_CLEAVAGE_OF_CYTOSKELETAL_PROTEINS	REACTOME_CASPASE_MEDIATED_CLEAVAGE_OF_CYTOSKELETAL_PROTEINS	12	-0.65325	-1.68305	0.016761	tags=50%, list=7%, signal=46%	MAPT/GAS2/DBNL/CASP6/CASP3/CASP8
KEGG_PORPHYRIN_AND_CHLOROPHYLL_METABOLISM	KEGG_PORPHYRIN_AND_CHLOROPHYLL_METABOLISM	38	-0.478197	-1.68637	0.00752562	tags=42%, list=18%, signal=35%	UROS/UGT1A5/FTMT/UGT2B15/PPOX/HMBS/UGT2B17/HMOX2/COX10/UGT2B7/UGT1A6/UGT2B11/ALAS2/CP/UGT2B10/BLVRB
REACTOME_METABOLISM_OF_AMINO_ACIDS_AND_DERIVATIVES	REACTOME_METABOLISM_OF_AMINO_ACIDS_AND_DERIVATIVES	353	-0.347658	-1.69428	4.56539e-07	tags=27%, list=18%, signal=22%	BCKDK/RPL10A/PSMD13/NAGS/TST/PSMF1/RPS13/ACMSD/RPL23A/RPS20/IVD/NQO1/CSAD/SERINC3/HGD/RPL17/TH/RPS25/IARS1/ASNS/CRYM/KARS1/BCKDHA/ENOPH1/RPL4/MTRR/RPL36AL/KYAT1/SLC36A4/IDO2/AMDHD1/PSMD8/CPS1/RPS21/PSMB10/PSMA2/GLUD2/AADAT/RPLP1/AZIN2/RPL9/MPST/RPL10/RPL29/RPS6/RPS2/RPL8/RPL18/SHMT1/PSME1/RPS29/PAPSS1/OCA2/ALDH18A1/GCSH/SLC44A1/PSMA1/PSMA6/RPS15A/ETHE1/LIPT2/GRHPR/RPSA/RPL7A/RPS26/RPS15/RPL26/LIP…
REACTOME_RRNA_PROCESSING	REACTOME_RRNA_PROCESSING	197	-0.376781	-1.71692	1.74684e-05	tags=31%, list=19%, signal=25%	EXOSC8/EBNA1BP2/RPL36A/IMP4/RPS4Y2/RPL10A/UTP25/DDX47/RPS13/RPL23A/RPS20/RPL17/RPS25/UTP3/RPL4/RRP36/NAT10/RPL36AL/KRR1/NHP2/EMG1/EXOSC5/RPS21/RPLP1/RPL9/RIOK1/RPL10/RPL29/RPS6/RPS2/NOP10/RPL8/RPL18/RPS29/RIOK3/SENP3/RPP38/RPS15A/RPSA/RPL7A/RPS26/EXOSC10/RPS15/RPL26/XRN2/RPLP0/RPL6/RPL26L1/RPL14/LAS1L/RPL7/NOP14/NSUN4/C1D/RPL21/RPS27/EXOSC1/RPS3A/RPS7/RPL32/RPL18A
YAMASHITA_LIVER_CANCER_WITH_EPCAM_UP	YAMASHITA_LIVER_CANCER_WITH_EPCAM_UP	51	-0.461082	-1.71714	0.00384859	tags=43%, list=21%, signal=34%	RPS4X/RPL31/XPO7/RPL23A/SRPK1/RPL17/EIF3F/TAF1D/MRPL3/RPL9/DSG2/RPL29/SPTBN1/TRIM24/RPSA/RPL7A/SCARB2/RPLP0/RPL6/HNRNPA1/RPS3A/RPS7
ZHANG_INTERFERON_RESPONSE	ZHANG_INTERFERON_RESPONSE	22	-0.564153	-1.73688	0.00687296	tags=59%, list=26%, signal=44%	IFRD1/IFI16/OAS1/IFI44/MX1/IFI27/OASL/ISG20/IFIT2/STAT1/IFITM1/SP110/IRF1
WP_ACE_INHIBITOR_PATHWAY	WP_ACE_INHIBITOR_PATHWAY	16	-0.615729	-1.73808	0.0133671	tags=31%, list=7%, signal=29%	ATP6AP2/AGT/AGTR1/MAS1/AGTR2
REACTOME_DEGRADATION_OF_CYSTEINE_AND_HOMOCYSTEINE	REACTOME_DEGRADATION_OF_CYSTEINE_AND_HOMOCYSTEINE	14	-0.644604	-1.74117	0.0123199	tags=57%, list=20%, signal=46%	ADO/CTH/TST/CSAD/MPST/ETHE1/SUOX/SQOR
REACTOME_NONSENSE_MEDIATED_DECAY_NMD	REACTOME_NONSENSE_MEDIATED_DECAY_NMD	116	-0.416022	-1.77345	0.00011621	tags=38%, list=18%, signal=31%	RPL36A/RPS4Y2/RPL10A/SMG5/RPS13/RPL23A/PABPC1/RPS20/RPL17/RPS25/RPL4/RPL36AL/UPF3A/RPS21/RPLP1/RPL9/RPL10/RPL29/RPS6/RPS2/GSPT2/RPL8/RPL18/RPS29/MAGOHB/RPS15A/RNPS1/RPSA/RPL7A/RPS26/RPS15/RPL26/RPLP0/RPL6/RPL26L1/RPL14/RPL7/RPL21/RPS27/RPS3A/RBM8A/RPS7/RPL32/RPL18A
EHLERS_ANEUPLOIDY_UP	EHLERS_ANEUPLOIDY_UP	39	-0.501523	-1.77783	0.00313118	tags=31%, list=13%, signal=27%	FKBP3/MRPS25/TMEM47/ALOX5AP/FNDC3A/RPL9/RHOC/RWDD2B/ALDH3A2/EEF1A1/CAST/ID2
KEGG_VALINE_LEUCINE_AND_ISOLEUCINE_DEGRADATION	KEGG_VALINE_LEUCINE_AND_ISOLEUCINE_DEGRADATION	40	-0.504596	-1.78245	0.00345789	tags=42%, list=22%, signal=33%	ACADSB/ACAA1/PCCB/ALDH2/IVD/MCEE/EHHADH/BCKDHA/MMUT/HMGCL/OXCT2/HADH/HADHA/ALDH6A1/ALDH3A2/OXCT1/ABAT
REACTOME_INFLUENZA_INFECTION	REACTOME_INFLUENZA_INFECTION	149	-0.408594	-1.79205	1.75655e-05	tags=36%, list=21%, signal=29%	RPL37/RPS4X/NUP35/HSPA1A/NUP205/RPL31/RPL36A/RPS4Y2/RPL10A/KPNA2/RPS13/RPL23A/RPS20/CANX/NUP54/RPL17/RPS25/NUP98/NUP37/RPL4/RPL36AL/RPS21/RPLP1/RPL9/NUP50/RPL10/RPL29/RPS6/RPS2/RPL8/RPL18/RAE1/RPS29/RPS15A/RPSA/RPL7A/RPS26/RPS15/RPL26/RPLP0/RPL6/RPL26L1/EIF2AK2/RPL14/RPL7/RPL21/POM121C/RPS27/NUP155/KPNA7/RPS3A/RPS7/RPL32/RPL18A
REACTOME_MITOCHONDRIAL_TRNA_AMINOACYLATION	REACTOME_MITOCHONDRIAL_TRNA_AMINOACYLATION	19	-0.616011	-1.79335	0.00335231	tags=53%, list=25%, signal=39%	RARS2/CARS2/SARS2/MARS2/HARS2/LARS2/VARS2/KARS1/PPA2/YARS2
LOPES_METHYLATED_IN_COLON_CANCER_DN	LOPES_METHYLATED_IN_COLON_CANCER_DN	26	-0.557812	-1.79971	0.00336015	tags=27%, list=6%, signal=25%	APC/MLH1/ERCC1/BDNF/CDKN2A/GRIN2B/SMAD6
REACTOME_ACTIVATION_OF_THE_MRNA_UPON_BINDING_OF_THE_CAP_BINDING_COMPLEX_AND_EIFS_AND_SUBSEQUENT_BINDING_TO_43S	REACTOME_ACTIVATION_OF_THE_MRNA_UPON_BINDING_OF_THE_CAP_BINDING_COMPLEX_AND_EIFS_AND_SUBSEQUENT_BINDING_TO_43S	57	-0.479544	-1.82562	0.000531736	tags=42%, list=21%, signal=34%	RPS4X/EIF3A/RPS4Y2/EIF3M/RPS13/EIF4A2/PABPC1/RPS20/EIF3F/RPS25/EIF4H/EIF1AX/RPS21/RPS6/EIF4E/RPS2/RPS29/RPS15A/RPSA/RPS26/RPS15/RPS27/RPS3A/RPS7
GARGALOVIC_RESPONSE_TO_OXIDIZED_PHOSPHOLIPIDS_RED_DN	GARGALOVIC_RESPONSE_TO_OXIDIZED_PHOSPHOLIPIDS_RED_DN	25	-0.582245	-1.84494	0.00306386	tags=52%, list=13%, signal=45%	FAM78A/INKA1/MLYCD/ZNF436/CLEC14A/EPHA4/VGLL4/KLHL3/GIT2/CEP68/SUOX/ZKSCAN4/TXNIP
NGO_MALIGNANT_GLIOMA_1P_LOH	NGO_MALIGNANT_GLIOMA_1P_LOH	14	-0.69438	-1.87562	0.00313508	tags=36%, list=5%, signal=34%	HSPA5/RPSA/TPM3/STMN1/ANXA2
WP_MITOCHONDRIAL_CIV_ASSEMBLY	WP_MITOCHONDRIAL_CIV_ASSEMBLY	28	-0.577273	-1.89176	0.00109196	tags=64%, list=31%, signal=45%	COX6B1/COX18/COA6/PNKD/COX7C/COX7B/COX14/SMIM20/COX6A1/COX20/COX7A2/SCO2/COX5B/HIGD1A/COX10/TMEM177/PET100/TACO1
REACTOME_NICOTINAMIDE_SALVAGING	REACTOME_NICOTINAMIDE_SALVAGING	16	-0.671681	-1.89602	0.00304948	tags=31%, list=8%, signal=29%	NAPRT/PTGS2/PARP4/PARP10/NAMPT
KEGG_RENIN_ANGIOTENSIN_SYSTEM	KEGG_RENIN_ANGIOTENSIN_SYSTEM	17	-0.66675	-1.90002	0.00130818	tags=29%, list=8%, signal=27%	LNPEP/AGT/AGTR1/MAS1/AGTR2
ZWANG_EGF_PERSISTENTLY_DN	ZWANG_EGF_PERSISTENTLY_DN	51	-0.510792	-1.90227	0.000514236	tags=39%, list=16%, signal=33%	SLC2A9/TMEM126A/TNS2/EYA2/TSPAN1/MTRR/EPB41L1/ALOX5AP/NECTIN1/DALRD3/RWDD2B/SYN3/TRPT1/LSM14B/CCNDBP1/FANCL/PIGV/MARCKS/CTC1/KLHDC2
REACTOME_REGULATION_OF_EXPRESSION_OF_SLITS_AND_ROBOS	REACTOME_REGULATION_OF_EXPRESSION_OF_SLITS_AND_ROBOS	170	-0.429005	-1.90362	6.52188e-07	tags=34%, list=18%, signal=28%	RPL36A/RPS4Y2/RPL10A/PSMD13/PSMF1/RPS13/RPL23A/PABPC1/RPS20/ROBO1/RPL17/RPS25/RPL4/RPL36AL/PSMD8/UPF3A/RPS21/PSMB10/PSMA2/RPLP1/RPL9/RPL10/RPL29/RPS6/RPS2/GSPT2/RPL8/RPL18/PSME1/RPS29/MAGOHB/LHX4/PSMA1/PSMA6/RPS15A/RNPS1/RPSA/RPL7A/RPS26/RPS15/RPL26/RPLP0/RPL6/RPL26L1/RPL14/USP33/RPL7/PSMC6/PSMC1/RPL21/RPS27/PSMC4/RPS3A/RBM8A/RPS7/RPL32/RPL18A
REACTOME_RESPONSE_OF_EIF2AK4_GCN2_TO_AMINO_ACID_DEFICIENCY	REACTOME_RESPONSE_OF_EIF2AK4_GCN2_TO_AMINO_ACID_DEFICIENCY	99	-0.452418	-1.90446	3.95493e-05	tags=38%, list=18%, signal=31%	RPL36A/RPS4Y2/RPL10A/RPS13/RPL23A/RPS20/RPL17/RPS25/ASNS/RPL4/RPL36AL/RPS21/RPLP1/RPL9/RPL10/RPL29/RPS6/RPS2/RPL8/RPL18/RPS29/RPS15A/RPSA/RPL7A/RPS26/RPS15/RPL26/RPLP0/RPL6/RPL26L1/RPL14/RPL7/RPL21/RPS27/RPS3A/RPS7/RPL32/RPL18A
ABE_INNER_EAR	ABE_INNER_EAR	42	-0.530968	-1.90515	0.00115725	tags=31%, list=14%, signal=27%	S100A13/CRYM/C19orf53/CLU/UTY/CCS/SELENOM/RPS15/NENF/COCH/VAMP5/RPL21/RPL32
KRIEG_KDM3A_TARGETS_NOT_HYPOXIA	KRIEG_KDM3A_TARGETS_NOT_HYPOXIA	179	-0.43104	-1.91932	1.3101e-07	tags=50%, list=26%, signal=38%	COX7C/RPUSD3/PTPN2/CYP1B1/SDSL/RPS19/ATPAF1/NUPR1/PDP1/OAS1/EIF2A/AKAP11/PLA2G4C/NOL8/SRI/ACTR6/ATP9B/TMEM254/ACSL5/TMEM218/ANKRD39/ACOT7/SAA1/RRM2B/IFI44/LYRM9/PGRMC1/LDLRAD3/MRPS18C/CDC42/TMEM126A/NFS1/GBP1/METTL1/THNSL1/GBP3/ASNS/MTX3/TMEM216/MIEN1/CSTF2/TMEM128/HMGN2/TAF1D/RPL36AL/ALG13/EMG1/PSMB10/TNFSF14/COA7/STOML1/CD47/B3GNT5/PAQR3/RIOK1/GLMN/WDR73/STAT1/BBS4/CHMP4A/ATP6AP2/SGK2/NDUFA12/P…
REACTOME_TRANSLATION	REACTOME_TRANSLATION	282	-0.408303	-1.93403	1.21676e-09	tags=33%, list=21%, signal=26%	MRPL48/RPL37/RPS4X/SEC61G/RPL31/EIF3A/SARS2/MRPL13/RPL36A/RPS4Y2/MARS2/MRPL11/RPL10A/EIF3M/MRPL21/HARS2/MRPL33/RPS13/MRPL22/MRPL46/EIF4A2/RPL23A/MRPS18C/LARS2/PABPC1/MRPL15/RPS20/VARS2/MRPS11/MRPL39/MRPL1/RPL17/EIF3F/RPS25/IARS1/EIF4H/KARS1/MRPS25/RPL4/N6AMT1/RPL36AL/MRPL3/MRPL52/EIF1AX/EEF1D/RPS21/RPLP1/MRPS26/RPL9/RPL10/MRPL40/RPL29/RPS6/EIF4E/RPS2/VARS1/GSPT2/SPCS2/RPL8/RPL18/RPS29/MRPL10/MRPS…
DAUER_STAT3_TARGETS_DN	DAUER_STAT3_TARGETS_DN	41	-0.5527	-1.95933	0.000379208	tags=61%, list=25%, signal=46%	IRF7/ID3/OAS1/TLR3/HSPA1A/IFIT1/TRIM5/DNAJB4/IFI44/TMEM97/IFIH1/MX1/IFI27/OASL/PGRMC2/PRPF4B/STAT1/IFITM1/LAP3/TRIM14/BCL2L13/LAMP3/HPGD/SP110/TDRD7
BILANGES_SERUM_RESPONSE_TRANSLATION	BILANGES_SERUM_RESPONSE_TRANSLATION	34	-0.587582	-2.02085	0.000373711	tags=41%, list=9%, signal=38%	EIF3F/RPL4/RPL10/RPL29/RPS6/KIF21B/CYP17A1/RPL6/RPL14/EEF1A1/RPL21/EEF1B2/RPS7/RPL18A
REACTOME_SRP_DEPENDENT_COTRANSLATIONAL_PROTEIN_TARGETING_TO_MEMBRANE	REACTOME_SRP_DEPENDENT_COTRANSLATIONAL_PROTEIN_TARGETING_TO_MEMBRANE	112	-0.486481	-2.07246	1.75957e-07	tags=38%, list=21%, signal=31%	RPL37/RPS4X/SEC61G/RPL31/RPL36A/RPS4Y2/RPL10A/RPS13/RPL23A/RPS20/RPL17/RPS25/RPL4/RPL36AL/RPS21/RPLP1/RPL9/RPL10/RPL29/RPS6/RPS2/SPCS2/RPL8/RPL18/RPS29/RPS15A/RPSA/RPL7A/RPS26/RPS15/SRP9/RPL26/RPLP0/RPL6/RPL26L1/RPL14/RPL7/RPL21/RPS27/RPS3A/RPS7/RPL32/RPL18A
REACTOME_SELENOAMINO_ACID_METABOLISM	REACTOME_SELENOAMINO_ACID_METABOLISM	113	-0.491334	-2.10056	2.28521e-07	tags=36%, list=18%, signal=30%	CTH/RPL36A/RPS4Y2/RPL10A/RPS13/RPL23A/RPS20/RPL17/RPS25/IARS1/KARS1/RPL4/RPL36AL/RPS21/RPLP1/RPL9/RPL10/RPL29/RPS6/RPS2/RPL8/RPL18/RPS29/PAPSS1/RPS15A/RPSA/RPL7A/RPS26/RPS15/RPL26/RPLP0/RPL6/RPL26L1/RPL14/RPL7/RPL21/RPS27/RPS3A/RPS7/RPL32/RPL18A
KEGG_BUTANOATE_METABOLISM	KEGG_BUTANOATE_METABOLISM	30	-0.632832	-2.12285	9.98944e-05	tags=53%, list=22%, signal=42%	AACS/PDHB/ALDH2/GAD1/ACSM3/ACSM5/EHHADH/ACSM4/ALDH5A1/HMGCL/OXCT2/HADH/HADHA/ALDH3A2/OXCT1/ABAT
WP_CYTOPLASMIC_RIBOSOMAL_PROTEINS	WP_CYTOPLASMIC_RIBOSOMAL_PROTEINS	87	-0.532471	-2.16815	1.5261e-07	tags=44%, list=18%, signal=36%	RPL37/RPS4X/RPL31/RPL36A/RPL10A/RPS13/RPL23A/RPS20/RPL17/RPS25/RPL4/RPS6KB2/RPS21/RPLP1/RPL9/RPL10/RPL29/RPS6/RPS2/RPL8/RPL18/RPS29/RPS15A/RPSA/RPL7A/RPS26/RPS15/RPL26/RPLP0/RPL6/RPL14/RPL7/RPL21/RPS27/RPS3A/RPS7/RPL32/RPL18A
REACTOME_EUKARYOTIC_TRANSLATION_INITIATION	REACTOME_EUKARYOTIC_TRANSLATION_INITIATION	117	-0.507739	-2.17338	2.4147e-08	tags=41%, list=21%, signal=33%	RPL37/RPS4X/RPL31/EIF3A/RPL36A/RPS4Y2/RPL10A/EIF3M/RPS13/EIF4A2/RPL23A/PABPC1/RPS20/RPL17/EIF3F/RPS25/EIF4H/RPL4/RPL36AL/EIF1AX/RPS21/RPLP1/RPL9/RPL10/RPL29/RPS6/EIF4E/RPS2/RPL8/RPL18/RPS29/RPS15A/RPSA/RPL7A/RPS26/RPS15/RPL26/RPLP0/RPL6/RPL26L1/RPL14/RPL7/RPL21/RPS27/RPS3A/RPS7/RPL32/RPL18A
KEGG_RIBOSOME	KEGG_RIBOSOME	87	-0.560139	-2.28081	6.91429e-09	tags=46%, list=21%, signal=37%	RPL37/RPS4X/RPL31/MRPL13/RPL36A/RPL10A/RPS13/RPL23A/RPS20/RPL17/RPS25/RPL4/RPL36AL/RPS21/RPLP1/RPL9/RPL10/RPL29/RPS6/RPS2/RPL8/RPL18/RPS29/RPS15A/RPSA/RPL7A/RPS26/RPS15/RPL26/RPLP0/RPL6/RPL26L1/RPL14/RPL7/RPL21/RPS27/RPS3A/RPS7/RPL32/RPL18A
REACTOME_EUKARYOTIC_TRANSLATION_ELONGATION	REACTOME_EUKARYOTIC_TRANSLATION_ELONGATION	94	-0.564228	-2.33709	3.95965e-09	tags=43%, list=18%, signal=35%	RPL36A/RPS4Y2/RPL10A/RPS13/RPL23A/RPS20/RPL17/RPS25/RPL4/RPL36AL/EEF1D/RPS21/RPLP1/RPL9/RPL10/RPL29/RPS6/RPS2/RPL8/RPL18/RPS29/RPS15A/RPSA/RPL7A/RPS26/RPS15/RPL26/RPLP0/RPL6/RPL26L1/RPL14/RPL7/EEF1A1/RPL21/RPS27/EEF1B2/RPS3A/RPS7/RPL32/RPL18A

## Sheet: B.Hallmarks Pea1_IGFBP6_Vs_Pea1
Table SIII. GSEA pathways and hallmarks in PEA1 IGFBP6 cells vs. PEA1 cells, and PEA2 IGFBP6 cells vs. PEA2 cells.
B, GSEA hallmarks in PEA1 cells treated with IGFBP6 vs. PEA1 Ctrl cells (adj P<0.05)
ID	Description	setSize	enrichmentScore	NES	pvalue	p.adjust	leading_edge	core_enrichment
TNFA_SIGNALING_VIA_NFKB	TNFA_SIGNALING_VIA_NFKB	191	0.60992	2.53498	1e-10	5e-09	tags=30%, list=8%, signal=28%	EGR1/FOS/DUSP1/CXCL2/TNF/IER3/JUN/JUNB/BHLHE40/ATF3/IL6/HBEGF/HES1/FOSB/PPP1R15A/IER2/CCN1/ZFP36/DUSP5/NFKBIA/PHLDA1/KLF10/CXCL1/RNF19B/NFKB2/TNFSF9/SERPINE1/SPSB1/SIK1/GEM/CLCF1/EDN1/B4GALT1/SOCS3/IL1B/PFKFB3/FOSL1/BTG2/CSF1/PTPRE/PMEPA1/KLF6/PLK2/SDC4/TGIF1/NFIL3/MYC/TIPARP/TNC/BCL6/SMAD3/PNRC1/CCL4/CCNL1/TNFAIP8/GADD45A/EIF1
UV_RESPONSE_UP	UV_RESPONSE_UP	153	0.503844	2.02989	7.27576e-08	1.81894e-06	tags=20%, list=7%, signal=18%	FOS/CXCL2/JUNB/ATF3/IL6/FOSB/PPIF/NFKBIA/DLG4/BSG/EPHX1/FURIN/CHKA/STIP1/CLCN2/MMP14/DNAJB1/GRINA/NXF1/TACR3/BTG2/DNAJA1/FEN1/SIGMAR1/ENO2/AMD1/ARRB2/EPCAM/EIF5/CYP1A1
HYPOXIA	HYPOXIA	196	0.456294	1.89932	4.57672e-07	7.62786e-06	tags=26%, list=14%, signal=22%	FOS/DUSP1/IER3/JUN/BHLHE40/ATF3/IL6/ADM/PPP1R15A/DDIT3/CCN1/ZFP36/MT2A/ANKZF1/SERPINE1/JMJD6/SLC25A1/PFKFB3/MT1E/NDST1/KLF6/SDC4/NFIL3/ERRFI1/MYH9/ENO2/TIPARP/BCL2/PNRC1/GPC1/CHST3/AK4/SCARB1/CCNG2/DDIT4/GAA/TGM2/TPI1/PPFIA4/EFNA1/ILVBL/PFKL/GCNT2/PDGFB/HK2/PYGM/HMOX1/HK1/VHL/PIM1
P53_PATHWAY	P53_PATHWAY	189	0.431748	1.7929	1.09853e-05	0.000137316	tags=29%, list=18%, signal=24%	FOS/IER3/JUN/ATF3/HBEGF/PPP1R15A/DDIT3/BAX/EPHA2/APAF1/EPHX1/RNF19B/RETSAT/TNFSF9/JAG2/PPM1D/TRAFD1/ABCC5/SFN/ABHD4/BTG2/PTPRE/PIDD1/TSPYL2/PLK2/BAIAP2/DGKA/TP63/GADD45A/DDIT4/RPL36/GLS2/KIF13B/APP/FAS/TOB1/RXRA/PRMT2/KRT17/CCNK/SERTAD3/HMOX1/MXD1/RAD9A/ST14/TM4SF1/IRAK1/SLC19A2/BAK1/MKNK2/CTSF/OSGIN1/PLXNB2/IER5/ITGB4
MITOTIC_SPINDLE	MITOTIC_SPINDLE	194	0.399848	1.66453	0.000169887	0.00169887	tags=38%, list=21%, signal=30%	AKAP13/YWHAE/CAPZB/ARHGDIA/ARHGEF11/CLIP2/TRIO/FLNB/TSC1/SOS1/NUMA1/PPP4R2/SMC1A/TAOK2/RASAL2/TPX2/DYNC1H1/CTTN/ITSN1/SAC3D1/MYH9/NET1/MYO9B/KIF11/ARHGEF2/MAP1S/LATS1/CLIP1/KIF23/OPHN1/KIF1B/SMC3/RHOT2/ALMS1/SPTAN1/RFC1/WASF1/RHOF/WASF2/CSNK1D/NF1/PRC1/CEP250/RASA1/KLC1/LMNB1/SORBS2/TBCD/SHROOM2/RABGAP1/MAP3K11/BCAR1/STAU1/KPTN/ESPL1/FARP1/SASS6/EPB41L2/CNTROB/NUSAP1/NCK2/LLGL1/AURKA/ANLN/ARL8A/T…
TGF_BETA_SIGNALING	TGF_BETA_SIGNALING	51	0.546011	1.82992	0.000684614	0.005647	tags=37%, list=12%, signal=33%	JUNB/PPP1R15A/KLF10/SMAD7/FURIN/SERPINE1/NCOR2/SKIL/FKBP1A/ID1/PMEPA1/TGIF1/PPP1CA/SMAD3/BMPR2/WWTR1/ENG/TRIM33/HIPK2
INFLAMMATORY_RESPONSE	INFLAMMATORY_RESPONSE	189	0.384546	1.59689	0.00079058	0.005647	tags=16%, list=7%, signal=15%	CXCL8/IL6/HBEGF/ADM/ATP2A2/NFKBIA/KCNJ2/TNFSF9/LY6E/MMP14/SERPINE1/EDN1/IL1B/KCNMB2/PCDH7/LCK/EMP3/TACR3/BTG2/CSF1/MARCO/PTPRE/KLF6/MYC/SEMA4D/FZD5/RHOG/SELENOS/TAPBP/KIF1B/MSR1
MYC_TARGETS_V2	MYC_TARGETS_V2	55	0.518247	1.7731	0.00185829	0.0116143	tags=47%, list=20%, signal=38%	SRM/MCM4/GRWD1/MYC/IPO4/MPHOSPH10/PA2G4/MCM5/SLC19A1/NOP2/TBRG4/GNL3/WDR43/PUS1/DCTPP1/NOP56/NPM1/RRP9/MYBBP1A/HK2/NDUFAF4/SORD/UTP20/PPRC1/HSPD1/NOC4L
ESTROGEN_RESPONSE_EARLY	ESTROGEN_RESPONSE_EARLY	188	0.362455	1.50483	0.00296604	0.0158607	tags=30%, list=19%, signal=25%	FOS/BHLHE40/HES1/PPIF/KLF10/CBFA2T3/FAM102A/FLNB/NCOR2/SVIL/KDM4B/SFN/B4GALT1/IL17RB/IGFBP4/SYT12/MYC/TIPARP/BCL2/GAB2/RAPGEFL1/TMEM164/SCARB1/TGM2/DHRS2/FHL2/IGF1R/SLC22A5/TOB1/ADCY9/OLFML3/PTGES/MYBBP1A/RPS6KA2/FASN/KAZN/ELF1/RBBP8/ITPK1/CD44/CALCR/ADCY1/SH3BP5/TFF3/MICB/FARP1/SLC19A2/MED24/MSMB/SIAH2/P2RY2/MED13L/TGIF2/KRT8/PODXL/SLC39A6/CELSR2
EPITHELIAL_MESENCHYMAL_TRANSITION	EPITHELIAL_MESENCHYMAL_TRANSITION	191	0.361678	1.50323	0.00317214	0.0158607	tags=17%, list=11%, signal=16%	JUN/CXCL8/IL6/CCN1/CXCL1/FBLN5/MMP14/SERPINE1/GEM/COL3A1/MYL9/BMP1/IGFBP4/EMP3/COL6A2/CADM1/PMEPA1/SDC4/ADAM12/ENO2/PCOLCE/FBLN1/TNC/SERPINH1/GPC1/TPM2/GADD45A/IL32/TGM2/SLC6A8/FAS/FSTL3/GAS1
IL2_STAT5_SIGNALING	IL2_STAT5_SIGNALING	191	0.353407	1.46885	0.00593968	0.0269985	tags=36%, list=25%, signal=27%	BHLHE40/SPRY4/CTSZ/PHLDA1/FURIN/ST3GAL4/PLEC/CSF1/IRF6/KLF6/NFIL3/MYC/SCN9A/RNH1/BCL2/ETV4/IKZF4/CKAP4/GALM/PRKCH/NOP2/LTB/POU2F1/TNFRSF18/BCL2L1/TGM2/BMPR2/PUS1/IGF1R/CDCP1/HUWE1/COL6A1/EOMES/HIPK2/IL1R2/GPR83/TLR7/HK2/MXD1/PIM1/CD44/AHCY/SPRED2/FAH/SNX9/FAM126B/APLP1/IFITM3/ITGA6/TNFRSF4/GABARAPL1/SHE/GBP4/XBP1/DHRS3/MAPKAPK2/CCNE1/LIF/MAFF/AHNAK/RORA/CDC6/BMP2/WLS/MUC1/DCPS/ICOS/ITGAV
APOPTOSIS	APOPTOSIS	154	0.37313	1.50504	0.00657785	0.0274077	tags=23%, list=15%, signal=19%	TNF/IER3/JUN/ATF3/IL6/GSTM1/DDIT3/BAX/SMAD7/RETSAT/IL1B/MADD/BTG2/DNAJA1/ENO2/AIFM3/PLPPR4/GADD45A/RHOT2/BCL2L1/SPTAN1/APP/FAS/GCH1/H1-0/F2/PPP3R1/PSEN2/HMOX1/MCL1/BIRC3/TIMP2/SOD1/CD44/CAV1
MYOGENESIS	MYOGENESIS	191	0.34896	1.45037	0.00790136	0.0293778	tags=28%, list=18%, signal=23%	BHLHE40/HBEGF/AGRN/SOD3/SVIL/ACTA1/COL3A1/DENND2B/MAPRE3/SMTN/COL6A2/PC/ADAM12/MYH9/MEF2A/TNNC2/RIT1/PDLIM7/TPM2/DMPK/MYH4/HSPB2/PTP4A3/GAA/SLC6A8/WWTR1/MYL4/GABARAPL2/SPTAN1/GNAO1/APP/SH3BGR/ADCY9/PPFIA4/LSP1/TSC2/CTF1/PDE4DIP/PSEN2/PYGM/SORBS3/ANKRD2/BDKRB2/ITGA7/MYH3/ACTC1/TNNT3/MYL1/MYLK/PLXNB2/SPEG/NCAM1/ITGB4/MYBPH
IL6_JAK_STAT3_SIGNALING	IL6_JAK_STAT3_SIGNALING	81	0.423798	1.55786	0.00834407	0.0293778	tags=26%, list=15%, signal=22%	TNF/JUN/IL6/CXCL1/SOCS3/IL1B/CBL/IL17RB/CSF1/LTBR/LTB/CNTFR/GRB2/FAS/PLA2G2A/IL9R/IL1R2/TNFRSF1A/HMOX1/PIM1/CD44
UV_RESPONSE_DN	UV_RESPONSE_DN	141	0.372366	1.4823	0.00881333	0.0293778	tags=29%, list=17%, signal=24%	DUSP1/BHLHE40/CCN1/SMAD7/ATRN/RBPMS/FBLN5/SERPINE1/MTA1/COL3A1/VAV2/MT1E/ID1/PEX14/MAP2K5/SPOP/MYC/IRS1/SMAD3/CELF2/PRDM2/PIK3CD/ATP2B4/BCKDHB/FHL2/AMPH/ATXN1/IGF1R/NIPBL/RXRA/PIK3R3/LDLR/HAS2/TENT4A/SLC7A1/CAV1/COL1A2/CDK13/LPAR1/DYRK1A/DBP
INTERFERON_ALPHA_RESPONSE	INTERFERON_ALPHA_RESPONSE	91	-0.368456	-1.47966	0.011054	0.0345436	tags=32%, list=16%, signal=27%	HELZ2/IFIH1/IL15/MX1/IFI27/TENT5A/OASL/ISG20/CMTR1/CD47/STAT2/PNPT1/IFIT2/PSME1/IFITM1/B2M/LAP3/GBP2/TRIM14/IFI44L/LAMP3/EIF2AK2/TAP1/BST2/SP110/IRF1/TDRD7/TXNIP/CASP8
CHOLESTEROL_HOMEOSTASIS	CHOLESTEROL_HOMEOSTASIS	69	0.418578	1.49664	0.0156144	0.0459248	tags=23%, list=10%, signal=21%	ATF3/CHKA/STX5/MVD/LSS/NFIL3/TP53INP1/ERRFI1/ANXA13/CPEB2/PNRC1/FADS2/ABCA2/SQLE/GSTM2/ADH4

## Sheet: C.Path Pea2_IGFBP6_Vs_Pea2_Ct
Table SIII. GSEA pathways and hallmarks in PEA1 IGFBP6 cells vs. PEA1 cells, and PEA2 IGFBP6 cells vs. PEA2 cells.
C, GSEA pathways in PEA2 cells treated with IGFBP6 vs. PEA2 Ctrl cells (P<0.05)
ID	Description	setSize	enrichmentScore	NES	pvalue	leading_edge	core_enrichment
PID_NFAT_TFPATHWAY	PID_NFAT_TFPATHWAY	44	-0.580537	-2.02626	2.31324e-05	tags=25%, list=7%, signal=23%	SLC3A2/TNF/POU2F1/IL2RA/JUN/IL5/NFATC1/PRKCQ/EGR1/CSF2/FOS
WP_CYTOKINES_AND_INFLAMMATORY_RESPONSE	WP_CYTOKINES_AND_INFLAMMATORY_RESPONSE	24	-0.63567	-1.94332	0.000457122	tags=29%, list=7%, signal=27%	IL15/TNF/CSF3/IL5/CXCL1/CXCL2/CSF2
WEIGEL_OXIDATIVE_STRESS_RESPONSE	WEIGEL_OXIDATIVE_STRESS_RESPONSE	32	-0.585675	-1.93705	0.000417465	tags=44%, list=16%, signal=37%	NR2F6/ZNF91/IER3/AMPH/DNPH1/CUX1/NFIX/COMT/ITGA5/DAPK1/ADORA1/BAX/MCM4/FOS
BIOCARTA_IL6_PATHWAY	BIOCARTA_IL6_PATHWAY	20	-0.658043	-1.91948	0.000732603	tags=35%, list=8%, signal=32%	RAF1/STAT3/GRB2/PTPN11/JUN/CEBPB/FOS
PID_TCR_CALCIUM_PATHWAY	PID_TCR_CALCIUM_PATHWAY	28	-0.600669	-1.91621	0.000668334	tags=39%, list=15%, signal=34%	FOSL1/PPP3CB/NFATC3/RCAN2/POU2F1/IL2RA/JUN/CABIN1/NFATC1/CSF2/FOS
GOUYER_TATI_TARGETS_DN	GOUYER_TATI_TARGETS_DN	16	-0.700865	-1.90971	0.000377484	tags=62%, list=18%, signal=51%	PTP4A3/MCAM/SNCG/RBBP8NL/HPN/LOXL4/A4GALT/TAGLN/FABP5/FN1
BIOCARTA_CCR5_PATHWAY	BIOCARTA_CCR5_PATHWAY	17	-0.683682	-1.89447	0.000732264	tags=41%, list=9%, signal=38%	PLCG1/CCL4/CALM3/JUN/MAPK8/CXCR4/FOS
BIOCARTA_INSULIN_PATHWAY	BIOCARTA_INSULIN_PATHWAY	19	-0.645638	-1.85583	0.00110649	tags=37%, list=8%, signal=34%	RAF1/GRB2/PIK3R1/PTPN11/JUN/MAPK8/FOS
WP_HEMATOPOIETIC_STEM_CELL_DIFFERENTIATION	WP_HEMATOPOIETIC_STEM_CELL_DIFFERENTIATION	56	-0.500244	-1.85335	0.00066034	tags=32%, list=21%, signal=26%	SPI1/PIM1/RUNX1/RIOK3/IL1A/STAT5A/KLF1/NOTCH1/CD34/CSF3/KCNH2/NCKAP1L/MIR221/IL5/CXCR4/LEF1/CSF2/FOS
FURUKAWA_DUSP6_TARGETS_PCI35_UP	FURUKAWA_DUSP6_TARGETS_PCI35_UP	61	-0.48968	-1.84778	0.000360429	tags=46%, list=23%, signal=35%	PLAAT4/APH1B/AKR1C3/KLRC3/HLA-F/PSMB9/KRT14/MDK/RTP4/MAPK11/LYPD5/IFI30/SLC1A2/AQP3/C15orf48/BTN1A1/ZBTB20/SAA1/SHFL/PLAAT2/CLDN16/TMCO4/BPHL/TAPBPL/TNFSF13B/ZFAT/KCNMB1/SECTM1
LIU_IL13_PRIMING_MODEL	LIU_IL13_PRIMING_MODEL	14	-0.700117	-1.84297	0.00201601	tags=29%, list=8%, signal=26%	EGFR/JMJD6/EGR1/FOS
BIOCARTA_FCER1_PATHWAY	BIOCARTA_FCER1_PATHWAY	37	-0.5352	-1.83604	0.000595999	tags=57%, list=13%, signal=49%	CALM1/HRAS/SYK/SHC1/PRKCB/MAPK3/MAP2K1/PPP3CB/NFATC3/FCER1A/PLCG1/RAF1/GRB2/CALM3/PIK3R1/PAK2/JUN/MAPK8/NFATC1/FCER1G/FOS
BIOCARTA_NGF_PATHWAY	BIOCARTA_NGF_PATHWAY	18	-0.649137	-1.82576	0.00173524	tags=39%, list=9%, signal=36%	PLCG1/RAF1/GRB2/PIK3R1/JUN/MAPK8/FOS
RASHI_RESPONSE_TO_IONIZING_RADIATION_1	RASHI_RESPONSE_TO_IONIZING_RADIATION_1	35	-0.53664	-1.82271	0.00126553	tags=43%, list=15%, signal=36%	WNT4/IER3/PAFAH1B2/FOXQ1/GADD45A/SERPINB6/VEGFA/WDR74/HSD11B1/ZFP36/IER2/JUN/DUSP1/EGR1/FOS
PID_AP1_PATHWAY	PID_AP1_PATHWAY	65	-0.474436	-1.82214	0.000347566	tags=26%, list=16%, signal=22%	COL1A2/FOSL1/CDKN2A/NFATC3/DMTF1/TCF7L2/TRIP6/CCN1/CBFB/JUN/IL5/NFATC1/SP1/DUSP1/EGR1/CSF2/FOS
CAFFAREL_RESPONSE_TO_THC_8HR_5_UP	CAFFAREL_RESPONSE_TO_THC_8HR_5_UP	13	-0.697382	-1.82008	0.00360038	tags=38%, list=11%, signal=34%	TES/STX5/SRRM2/CTSL/IPO7
BIOCARTA_EPO_PATHWAY	BIOCARTA_EPO_PATHWAY	19	-0.618281	-1.77719	0.00226129	tags=58%, list=22%, signal=45%	HRAS/SHC1/MAPK3/MAP2K1/STAT5A/PLCG1/RAF1/GRB2/JUN/MAPK8/FOS
BIOCARTA_IL2_PATHWAY	BIOCARTA_IL2_PATHWAY	21	-0.597681	-1.76841	0.00350364	tags=57%, list=25%, signal=43%	HRAS/SYK/SHC1/MAPK3/MAP2K1/STAT5A/RAF1/GRB2/IL2RA/JUN/MAPK8/FOS
BIOCARTA_IGF1_PATHWAY	BIOCARTA_IGF1_PATHWAY	19	-0.614882	-1.76742	0.00244817	tags=37%, list=8%, signal=34%	RAF1/GRB2/PIK3R1/PTPN11/JUN/MAPK8/FOS
BIOCARTA_STEM_PATHWAY	BIOCARTA_STEM_PATHWAY	14	-0.661816	-1.74215	0.00799168	tags=29%, list=5%, signal=27%	CSF3/CD8A/IL5/CSF2
REACTOME_NETRIN_1_SIGNALING	REACTOME_NETRIN_1_SIGNALING	49	-0.479343	-1.73652	0.00161395	tags=37%, list=17%, signal=31%	TRIO/PAK1/SLIT3/MAPK11/UNC5A/RGMB/PLCG1/UNC5C/ABLIM1/PTPN11/DSCAM/TRPC7/FYN/MAPK8/HJV/PRKCQ/AGAP2/CDC42
AMIT_SERUM_RESPONSE_40_MCF10A	AMIT_SERUM_RESPONSE_40_MCF10A	27	-0.548834	-1.73453	0.00418629	tags=26%, list=8%, signal=24%	ZFP36/GLUL/JUN/CXCL2/DUSP1/EGR1/FOS
BOHN_PRIMARY_IMMUNODEFICIENCY_SYNDROM_DN	BOHN_PRIMARY_IMMUNODEFICIENCY_SYNDROM_DN	36	-0.507681	-1.72873	0.00518648	tags=39%, list=11%, signal=35%	DYRK2/SLC12A8/DPYD/CDKN2A/CTSH/LTB/TLR7/SMCO4/TUBB6/CHI3L2/RABEP2/KDM4B/NIPA2/DUSP1
BIOCARTA_LAIR_PATHWAY	BIOCARTA_LAIR_PATHWAY	16	-0.634225	-1.72813	0.00336567	tags=44%, list=16%, signal=37%	IL1A/C6/SELP/ICAM1/TNF/ITGB1/C3
WP_CELLS_AND_MOLECULES_INVOLVED_IN_LOCAL_ACUTE_INFLAMMATORY_RESPONSE	WP_CELLS_AND_MOLECULES_INVOLVED_IN_LOCAL_ACUTE_INFLAMMATORY_RESPONSE	16	-0.634225	-1.72813	0.00336567	tags=44%, list=16%, signal=37%	IL1A/C6/SELP/ICAM1/TNF/ITGB1/C3
BIOCARTA_TPO_PATHWAY	BIOCARTA_TPO_PATHWAY	22	-0.579114	-1.72475	0.00516684	tags=59%, list=22%, signal=46%	HRAS/SHC1/PRKCB/MAPK3/MAP2K1/STAT5A/PLCG1/RAF1/STAT3/GRB2/PIK3R1/JUN/FOS
WP_BIOGENIC_AMINE_SYNTHESIS	WP_BIOGENIC_AMINE_SYNTHESIS	14	-0.651297	-1.71446	0.010275	tags=50%, list=19%, signal=40%	TH/MAOA/TPH1/COMT/CHAT/PAH/GAD2
WP_PHYSIOLOGICAL_AND_PATHOLOGICAL_HYPERTROPHY_OF_THE_HEART	WP_PHYSIOLOGICAL_AND_PATHOLOGICAL_HYPERTROPHY_OF_THE_HEART	24	-0.559618	-1.71082	0.00573521	tags=46%, list=17%, signal=38%	EDN1/PRKCB/RHOA/MAPK11/CAMK2D/PPP3CB/STAT3/JUN/MAPK8/MAP2K3/FOS
BIOCARTA_MET_PATHWAY	BIOCARTA_MET_PATHWAY	32	-0.513779	-1.69926	0.00545743	tags=31%, list=8%, signal=29%	RAF1/STAT3/HGF/GRB2/ITGB1/PIK3R1/PTPN11/JUN/MAPK8/FOS
LU_EZH2_TARGETS_UP	LU_EZH2_TARGETS_UP	270	-0.362262	-1.69833	1.04146e-05	tags=43%, list=26%, signal=32%	SURF2/LMTK3/CFD/ELOB/AMDHD2/SCAND1/RPUSD1/CCDC32/PSMD4/SKA2/AKR1C2/TMEM30A/ZNF133/NME2/PPP1R14B/RPL13AP6/PLAAT4/PFKL/NES/CCDC107/C8orf82/GFOD2/TOMM22/PSMB8/ALKBH2/C2CD2/RAD51D/MEX3D/TLCD1/GCHFR/KRTCAP2/PCNX3/REEP5/PMVK/RPAIN/PSMB9/CAVIN3/H2AC20/CBR1/CENPV/B4GALT1/ZNHIT1/IER3/BIK/ADAP1/SNCG/NEURL3/MAFA/CBY1/MAPK11/OASL/MSRB3/ZNF629/MICAL2/HABP4/GUCD1/PARD6A/TUFT1/ATOX1/RGS19/UNC45A/CUTA/RPL36/PAQR…
BIOCARTA_BCR_PATHWAY	BIOCARTA_BCR_PATHWAY	32	-0.512365	-1.69458	0.00568325	tags=53%, list=25%, signal=40%	CALM1/HRAS/SYK/SHC1/PRKCB/MAPK3/MAP2K1/PPP3CB/NFATC3/PLCG1/RAF1/GRB2/CALM3/JUN/MAPK8/NFATC1/FOS
REACTOME_THE_CANONICAL_RETINOID_CYCLE_IN_RODS_TWILIGHT_VISION	REACTOME_THE_CANONICAL_RETINOID_CYCLE_IN_RODS_TWILIGHT_VISION	22	-0.568056	-1.69182	0.00659995	tags=32%, list=14%, signal=27%	RDH11/RDH10/STRA6/DHRS9/RDH8/RDH12/MYO7A
WP_PDGFRBETA_PATHWAY	WP_PDGFRBETA_PATHWAY	28	-0.529352	-1.6887	0.00747532	tags=54%, list=22%, signal=42%	SHC1/PRKCB/MAPK3/MAP2K1/EIF2AK2/STAT5A/PLCG1/RAF1/STAT3/GRB2/PIK3R1/STAT6/JUN/MAPK8/FOS
PID_CD8_TCR_DOWNSTREAM_PATHWAY	PID_CD8_TCR_DOWNSTREAM_PATHWAY	62	-0.440596	-1.67574	0.00161186	tags=37%, list=22%, signal=29%	PRKCB/EOMES/CD3G/MAPK3/MAP2K1/TNFRSF18/IFNA10/CD8B/FOSL1/PPP3CB/NFATC3/RAF1/IFNA14/TNF/IFNAR2/CD8A/IL2RA/JUN/MAPK8/NFATC1/PRKCQ/EGR1/FOS
PHONG_TNF_TARGETS_UP	PHONG_TNF_TARGETS_UP	57	-0.449851	-1.66944	0.00349991	tags=21%, list=8%, signal=19%	ZFP36/ICAM1/IER2/BHLHE40/JUN/CXCL1/IRF1/CXCL2/DUSP1/EGR1/CSF2/FOS
TIMOFEEVA_GROWTH_STRESS_VIA_STAT1_DN	TIMOFEEVA_GROWTH_STRESS_VIA_STAT1_DN	15	-0.614135	-1.6684	0.00945585	tags=60%, list=25%, signal=45%	HRAS/HSPB1/MCL1/TNPO2/HSF1/PRDX2/CUX1/CCND2/CDK10
PID_RHOA_PATHWAY	PID_RHOA_PATHWAY	43	-0.467488	-1.66759	0.00963554	tags=33%, list=17%, signal=27%	RHOA/F2RL2/PARD6A/MYL2/LIMK2/CCN1/ITGB1/PRKCZ/CFL1/JUN/MAPK8/MAP2K3/CDC42/FOS
REACTOME_TRP_CHANNELS	REACTOME_TRP_CHANNELS	27	-0.52718	-1.6661	0.00902031	tags=33%, list=19%, signal=27%	TRPM3/RIPK1/TRPV4/TRPV6/MCOLN1/TRPM2/TRPV1/TRPC7/MLKL
REACTOME_CD28_DEPENDENT_VAV1_PATHWAY	REACTOME_CD28_DEPENDENT_VAV1_PATHWAY	12	-0.652271	-1.66374	0.0102387	tags=67%, list=19%, signal=54%	CD80/PAK1/PAK3/CD86/GRB2/PAK2/FYN/CDC42
PID_IL5_PATHWAY	PID_IL5_PATHWAY	14	-0.631751	-1.66301	0.0178979	tags=57%, list=24%, signal=44%	SDCBP/PIM1/CISH/STAT5A/GRB2/PIK3R1/PTPN11/IL5
AMIT_EGF_RESPONSE_40_MCF10A	AMIT_EGF_RESPONSE_40_HELA	16	-0.607547	-1.65544	0.00759597	tags=50%, list=13%, signal=43%	TUFT1/GNS/NDUFB6/CCN1/ZFP36/JUN/EGR1/FOS
ACEVEDO_LIVER_TUMOR_VS_NORMAL_ADJACENT_TISSUE_DN	ACEVEDO_LIVER_TUMOR_VS_NORMAL_ADJACENT_TISSUE_DN	251	-0.355752	-1.65049	3.45136e-05	tags=27%, list=20%, signal=22%	GPD1/TCF25/ANGPTL8/STAB1/SYMPK/GADD45G/NOP14/SPINT2/AXL/MBD3/SLC7A5/ATP6V1B2/IER3/SKAP1/NSMF/C2orf42/NAT2/HOOK1/DEPP1/RDH11/TMEM30B/CYP2E1/TRIB1/OGDHL/CHST4/HMGCL/RAB17/LTBP4/ARG1/SH3TC1/CPED1/LRRC75B/PAQR7/ATF5/TCIM/IDO2/TRIP6/RAB26/CYFIP2/C9/NRDE2/SHFL/DLST/CNNM3/GSDMB/ITIH3/NUCKS1/SLC25A37/ASB1/VKORC1/ACCS/BHLHE40/PPP1R15A/PMPCA/ZBTB48/PIEZO1/TNFRSF21/ACAA1/PNMA3/CFAP410/TNPO3/F9/C3/MYO7A/EGR1…
PID_HNF3A_PATHWAY	PID_HNF3A_PATHWAY	42	-0.463077	-1.64515	0.00947237	tags=26%, list=10%, signal=24%	NR2F2/BRCA1/ATP5PF/POU2F1/CREBBP/DSCAM/JUN/CEBPB/SP1/KLK3/FOS
REACTOME_MRNA_DECAY_BY_5_TO_3_EXORIBONUCLEASE	REACTOME_MRNA_DECAY_BY_5_TO_3_EXORIBONUCLEASE	15	-0.604853	-1.64318	0.0129355	tags=60%, list=26%, signal=45%	LSM6/EDC4/LSM1/LSM2/LSM5/PATL1/DCP1B/EDC3/XRN1
RADAEVA_RESPONSE_TO_IFNA1_UP	RADAEVA_RESPONSE_TO_IFNA1_UP	46	-0.457019	-1.63935	0.00764277	tags=26%, list=9%, signal=24%	CYB561D2/PIAS4/MXD4/BRCA1/RFC2/UBE2D3/MX2/BST2/BAX/IRF1/PRKCQ/KLK3
BIOCARTA_IL3_PATHWAY	BIOCARTA_IL3_PATHWAY	15	-0.601419	-1.63385	0.0144484	tags=60%, list=28%, signal=43%	IL3/HRAS/SHC1/MAPK3/MAP2K1/STAT5A/RAF1/GRB2/FOS
PID_REG_GR_PATHWAY	PID_REG_GR_PATHWAY	79	-0.414007	-1.63367	0.00157027	tags=25%, list=5%, signal=24%	FGG/STAT5A/MAPK11/TBP/KMT5B/NCOA1/ICAM1/MAPK10/SELE/POU2F1/CREBBP/JUN/IL5/BAX/MAPK8/NFATC1/IRF1/EGR1/CSF2/FOS
WP_GALANIN_RECEPTOR_PATHWAY	WP_GALANIN_RECEPTOR_PATHWAY	19	-0.568099	-1.63295	0.00837979	tags=26%, list=11%, signal=24%	YAP1/VEGFA/PRKCD/TFAP2A/FOS
DAZARD_RESPONSE_TO_UV_NHEK_UP	DAZARD_RESPONSE_TO_UV_NHEK_UP	209	-0.35866	-1.63277	8.84239e-05	tags=31%, list=22%, signal=25%	COL19A1/C2orf27A/FOXC1/RPS17/TXN/TGM3/GCHFR/RPS27/HLA-F/SNRPE/ATP5ME/RPL30/H2AC16/H2AC20/H2AC13/CLTB/NDUFC1/H2AC8/RPL34/IER3/NDUFA1/TRIB1/H2BC6/NCBP2/NREP/RPSA/NUCB1/GADD45A/NEFM/ANXA2P3/PHLDA1/PSMD8/RCAN2/IL1RL1/PRAMEF1/CCN1/NKX2-1/ZFP36/SFI1/CST6/HSPA2/CCK/IER2/TUBB2A/PMS2P1/PPP1R15A/HTR4/SULT2B1/TUBB4A/STAT6/UQCRB/CRADD/TAGLN3/TUBB3/TAGLN/TOM1/JUN/PRDM1/CXCL1/CYP2J2/CXCL2/ERCC1/DUSP1/GAD2/FOS
BARRIER_COLON_CANCER_RECURRENCE_DN	BARRIER_COLON_CANCER_RECURRENCE_DN	17	-0.588226	-1.62997	0.0143849	tags=59%, list=16%, signal=49%	TSPAN7/PFKL/BSG/FOXJ3/NUCB1/BTBD2/KCNAB1/ACOT11/ARHGAP33/CDK10
HINATA_NFKB_TARGETS_FIBROBLAST_UP	HINATA_NFKB_TARGETS_FIBROBLAST_UP	78	-0.411791	-1.62625	0.00222125	tags=29%, list=16%, signal=25%	TBC1D12/MYBL1/IER3/TNFAIP8/EXOSC9/GADD45A/VEGFA/MRPL33/LRRN3/EGFR/ANXA13/ICAM1/SOD2/GABBR1/MT3/SELE/CCNH/CXCL1/ADAMTS3/IRF1/TAF15/FN1/ERCC1
PID_MAPK_TRK_PATHWAY	PID_MAPK_TRK_PATHWAY	32	-0.49058	-1.62253	0.00915327	tags=22%, list=8%, signal=20%	RAF1/MAPK7/TRPV1/PRKCD/MAP2K3/EGR1/FOS
BIOCARTA_EGF_PATHWAY	BIOCARTA_EGF_PATHWAY	26	-0.516302	-1.62223	0.0187391	tags=54%, list=9%, signal=49%	SHC1/PRKCB/MAPK3/MAP2K1/STAT5A/PLCG1/EGFR/RAF1/STAT3/GRB2/PIK3R1/JUN/MAPK8/FOS
CHEOK_RESPONSE_TO_HD_MTX_UP	CHEOK_RESPONSE_TO_HD_MTX_UP	19	-0.562636	-1.61724	0.0100406	tags=32%, list=13%, signal=28%	CTSG/MYLK/ABLIM1/AZU1/LYZ/BAX
WP_THE_ALTERNATIVE_PATHWAY_OF_FETAL_ANDROGEN_SYNTHESIS	WP_THE_ALTERNATIVE_PATHWAY_OF_FETAL_ANDROGEN_SYNTHESIS	11	-0.651082	-1.61605	0.0313478	tags=82%, list=24%, signal=62%	HSD17B6/STAR/AKR1C2/AKR1C4/CYP11A1/CYB5A/HSD17B3/SRD5A2/HSD3B2
BIOCARTA_CARDIACEGF_PATHWAY	BIOCARTA_CARDIACEGF_PATHWAY	18	-0.574459	-1.61572	0.0165054	tags=56%, list=25%, signal=42%	ADAM12/EDNRB/HRAS/EDN1/PRKCB/RHOA/PLCG1/EGFR/JUN/FOS
REACTOME_DECTIN_2_FAMILY	REACTOME_DECTIN_2_FAMILY	22	-0.541528	-1.61281	0.0140231	tags=32%, list=11%, signal=28%	MUC6/MUC16/MUC4/MUC12/FYN/CLEC4D/FCER1G
GAJATE_RESPONSE_TO_TRABECTEDIN_UP	GAJATE_RESPONSE_TO_TRABECTEDIN_UP	62	-0.422847	-1.60823	0.0044036	tags=32%, list=16%, signal=27%	FGG/EML2/ASNS/OASL/SEPTIN6/ARL6IP1/CASP9/GADD45A/TRAPPC6A/NUPR1/DDR2/CLDN7/PHYH/UGCG/CYP19A1/PROS1/NNT/CXCR4/TAF15/FOS
BERENJENO_TRANSFORMED_BY_RHOA_REVERSIBLY_UP	BERENJENO_TRANSFORMED_BY_RHOA_REVERSIBLY_UP	10	-0.665252	-1.60228	0.0195735	tags=90%, list=33%, signal=60%	DAP/TNFRSF1B/UGT1A10/SQSTM1/DNM1/MGST3/GSTA1/PIK3R1/LY6H
BURTON_ADIPOGENESIS_PEAK_AT_2HR	BURTON_ADIPOGENESIS_PEAK_AT_2HR	46	-0.446339	-1.60104	0.0118456	tags=30%, list=19%, signal=25%	GADD45G/RHOB/TNFAIP6/FOXC2/IER3/PHLDA1/EMD/CCN1/ZFP36/PPP1R15A/CXCL2/MAP2K3/DUSP1/FOS
REACTOME_STIMULI_SENSING_CHANNELS	REACTOME_STIMULI_SENSING_CHANNELS	99	-0.386014	-1.59821	0.00233225	tags=29%, list=19%, signal=24%	ANO9/TRPM3/UBC/SLC9C1/RIPK1/TRPV4/CASQ1/RPS27A/ANO1/NEDD4L/SLC9B2/TRPV6/ANO8/ASPH/SGK2/RAF1/MCOLN1/TRPM2/ASIC4/TRPV1/ANO5/SRI/TRPC7/SLC9B1/NALCN/MLKL/ASIC3/CLCN2/ANO7
MANNE_COVID19_COMBINED_COHORT_VS_HEALTHY_DONOR_PLATELETS_UP	MANNE_COVID19_COMBINED_COHORT_VS_HEALTHY_DONOR_PLATELETS_UP	164	-0.361949	-1.5975	0.000292615	tags=24%, list=15%, signal=20%	ARMC12/AMHR2/P2RX4/KLF1/SPATA20/EXOC3L4/AHSP/IFITM3/TPM2/ALS2CL/MVB12A/ITPKC/TPRN/PCGF2/NRSN2/TSPAN4/CMTM7/HPR/LRP3/LPAR2/LMO4/SLC25A37/ASIC4/PSPN/SMIM1/SLC6A8/FLYWCH1/TGIF2/MSRB2/XYLT2/COX10/FKBPL/RSAD2/CRELD2/FDXR/SLC25A39/FAM131C/KREMEN1/TSPAN17
WP_SEROTONIN_AND_ANXIETYRELATED_EVENTS	WP_SEROTONIN_AND_ANXIETYRELATED_EVENTS	12	-0.625859	-1.59637	0.0175745	tags=25%, list=2%, signal=25%	PRKCB/PLCD4/FOS
WP_PDGF_PATHWAY	WP_PDGF_PATHWAY	36	-0.46846	-1.59517	0.0147482	tags=28%, list=9%, signal=25%	PLCG1/RAF1/STAT3/GRB2/PIK3R1/PTPN11/JUN/MAPK8/CDC42/FOS
SUMI_HNF4A_TARGETS	SUMI_HNF4A_TARGETS	27	-0.504072	-1.59307	0.0156922	tags=30%, list=13%, signal=26%	ERICH4/ACSM2B/CYP4F3/CYP19A1/SLCO2B1/ATP6V0E2/SOAT2/SLC13A5
REACTOME_GPVI_MEDIATED_ACTIVATION_CASCADE	REACTOME_GPVI_MEDIATED_ACTIVATION_CASCADE	34	-0.470448	-1.58915	0.017681	tags=24%, list=5%, signal=22%	PIK3R1/PTPN11/PRKCZ/FYN/PIK3R6/PDPK1/FCER1G/CDC42
DUAN_PRDM5_TARGETS	DUAN_PRDM5_TARGETS	71	-0.406443	-1.58705	0.00506759	tags=28%, list=15%, signal=24%	EED/PAX6/ZFPM1/OVOL1/NOTCH1/NREP/CDC42EP4/ARID3B/LRRC37A3/RARA/CACNA1C/UBL7/ACSBG1/POU2F3/GOLGA6A/CLDN16/CLK3/GCK/CYP3A7/GPR1
MEBARKI_HCC_PROGENITOR_WNT_DN_BLOCKED_BY_FZD8CRD	MEBARKI_HCC_PROGENITOR_WNT_DN_BLOCKED_BY_FZD8CRD	56	-0.427116	-1.58242	0.0107757	tags=25%, list=12%, signal=22%	STOX1/LINC00482/RASGRP2/RAB26/RASSF4/DHRS9/GASK1A/LINC01554/EPHA10/NR3C2/LAIR1/ADGRF5/FGD4/SLC6A16
WP_CLASSICAL_PATHWAY_OF_STEROIDOGENESIS_WITH_GLUCOCORTICOID_AND_MINERALOCORTICOID_METABOLISM	WP_CLASSICAL_PATHWAY_OF_STEROIDOGENESIS_WITH_GLUCOCORTICOID_AND_MINERALOCORTICOID_METABOLISM	14	-0.600504	-1.58076	0.0328981	tags=57%, list=28%, signal=41%	H6PD/CYP11A1/CYB5A/HSD17B3/SRD5A2/HSD11B1/CYP19A1/HSD3B2
WHITEHURST_PACLITAXEL_SENSITIVITY	WHITEHURST_PACLITAXEL_SENSITIVITY	36	-0.463649	-1.57879	0.0169163	tags=19%, list=4%, signal=19%	TBL1Y/DNHD1/ACRBP/ITIH5/FGD4/FBH1/GAL3ST4
BILBAN_B_CLL_LPL_DN	BILBAN_B_CLL_LPL_DN	40	-0.45207	-1.57754	0.00854811	tags=35%, list=17%, signal=29%	HOMER3/FNBP4/ARGLU1/IER3/SUGP2/H2BC8/TCF7/ARHGEF6/MNDA/ZBTB20/GOLGA8IP/FYN/DUSP1/FOS
MATZUK_SPERMATOGONIA	MATZUK_SPERMATOGONIA	22	-0.52953	-1.57708	0.0190438	tags=55%, list=12%, signal=48%	GJA1/RBP4/KIT/ZBTB16/STRA8/CDKN2D/LIMK2/CYP19A1/APAF1/SLC19A2/BAX/PIN1
PID_IL12_STAT4_PATHWAY	PID_IL12_STAT4_PATHWAY	30	-0.4839	-1.57137	0.0217024	tags=27%, list=9%, signal=24%	CD86/STAT3/CREBBP/IL2RA/JUN/MAPK8/IRF1/FOS
REACTOME_RUNX1_AND_FOXP3_CONTROL_THE_DEVELOPMENT_OF_REGULATORY_T_LYMPHOCYTES_TREGS	REACTOME_RUNX1_AND_FOXP3_CONTROL_THE_DEVELOPMENT_OF_REGULATORY_T_LYMPHOCYTES_TREGS	10	-0.651417	-1.56896	0.0259461	tags=50%, list=7%, signal=47%	TNFRSF18/RUNX1/CBFB/IL2RA/CR1
RIZ_ERYTHROID_DIFFERENTIATION_HBZ	RIZ_ERYTHROID_DIFFERENTIATION_HBZ	35	-0.461866	-1.56874	0.0119494	tags=26%, list=16%, signal=22%	MCM5/HMGB1/TFAP2C/MCM7/CUX1/CBX3/POU2F3/MCM4/CBX7
HINATA_NFKB_TARGETS_KERATINOCYTE_UP	HINATA_NFKB_TARGETS_KERATINOCYTE_UP	81	-0.392941	-1.56802	0.00345976	tags=23%, list=11%, signal=21%	TNC/GADD45A/VEGFA/ARHGDIB/EGFR/SAA1/ICAM1/IL15/SOD2/TNF/MT3/GABARAPL1/CCNH/SLC7A2/IRF1/MAP2K3/FN1/ERCC1/CSF2
CHEMELLO_SOLEUS_VS_EDL_MYOFIBERS_UP	CHEMELLO_SOLEUS_VS_EDL_MYOFIBERS_UP	19	-0.544416	-1.56487	0.0148721	tags=47%, list=23%, signal=37%	HSPB1/SMPX/FHL2/CASQ1/TPM2/MYL2/ANKRD2/CAVIN4/ATP2A1
WP_SIGNALING_OF_HEPATOCYTE_GROWTH_FACTOR_RECEPTOR	WP_SIGNALING_OF_HEPATOCYTE_GROWTH_FACTOR_RECEPTOR	33	-0.464163	-1.56235	0.0112399	tags=27%, list=8%, signal=25%	RAF1/STAT3/HGF/GRB2/ITGB1/PTPN11/JUN/MAPK8/FOS
GOERING_BLOOD_HDL_CHOLESTEROL_QTL_TRANS	GOERING_BLOOD_HDL_CHOLESTEROL_QTL_TRANS	11	-0.627678	-1.55796	0.0465647	tags=36%, list=9%, signal=33%	SELENON/NACC2/PAF1/KLK3
YANG_BREAST_CANCER_ESR1_DN	YANG_BREAST_CANCER_ESR1_DN	23	-0.514445	-1.5568	0.0191534	tags=61%, list=27%, signal=44%	BCL11A/TRIM2/CDH3/CYB5R2/PUM3/RARRES1/LBR/LDHB/ARHGEF9/YEATS2/SLC25A37/TUBB6/SFRP1/FABP5
BIOCARTA_D4GDI_PATHWAY	BIOCARTA_D4GDI_PATHWAY	11	-0.627063	-1.55643	0.0483908	tags=64%, list=14%, signal=54%	CASP3/ARHGAP5/CASP9/ARHGDIB/CASP10/JUN/APAF1
WP_TCELL_ANTIGEN_RECEPTOR_TCR_PATHWAY_DURING_STAPHYLOCOCCUS_AUREUS_INFECTION	WP_TCELL_ANTIGEN_RECEPTOR_TCR_PATHWAY_DURING_STAPHYLOCOCCUS_AUREUS_INFECTION	59	-0.414488	-1.55516	0.0142327	tags=22%, list=9%, signal=20%	PLCG1/RAF1/GRB2/TNF/CD8A/PDK1/JUN/FYN/IL5/PRKCQ/ICOS/CSF2/FOS
WP_MTHFR_DEFICIENCY	WP_MTHFR_DEFICIENCY	25	-0.501291	-1.55393	0.0197966	tags=56%, list=14%, signal=48%	HNMT/GRIN2A/DNMT1/ALDH7A1/CASP3/DNMT3B/CASP9/EHMT2/COMT/NDUFAF7/PEMT/GRIN1/MTHFR/CHDH
MANNE_COVID19_ICU_VS_HEALTHY_DONOR_PLATELETS_UP	MANNE_COVID19_ICU_VS_HEALTHY_DONOR_PLATELETS_UP	116	-0.366145	-1.5523	0.00281518	tags=28%, list=16%, signal=23%	CRELD1/FIBP/ARMC12/P2RX4/C20orf27/FAM160B2/KLF1/SPATA20/EXOC3L4/IFITM3/TPM2/ALS2CL/ITPKC/TPRN/NRSN2/STARD7/TSPAN4/C6orf223/HPR/LRP3/LPAR2/ABHD14A/HCFC1R1/SLC25A37/PSPN/SMIM1/FLYWCH1/XYLT2/RSAD2/FDXR/KREMEN1/TSPAN17
KYNG_WERNER_SYNDROM_DN	KYNG_WERNER_SYNDROM_DN	18	-0.551857	-1.55215	0.0277106	tags=22%, list=6%, signal=21%	BHLHE40/TAF10/KDSR/GORAB
WP_IL2_SIGNALING_PATHWAY	WP_IL2_SIGNALING_PATHWAY	41	-0.438372	-1.5465	0.0237256	tags=29%, list=9%, signal=27%	RPS6KB2/RAF1/STAT3/GRB2/FOXO3/PIK3R1/CCND2/PTPN11/IL2RA/JUN/FYN/FOS
BIOCARTA_PDGF_PATHWAY	BIOCARTA_PDGF_PATHWAY	26	-0.491758	-1.54511	0.0294034	tags=50%, list=9%, signal=46%	SHC1/PRKCB/MAPK3/MAP2K1/STAT5A/PLCG1/RAF1/STAT3/GRB2/PIK3R1/JUN/MAPK8/FOS
REACTOME_SIGNALING_BY_NTRK3_TRKC	REACTOME_SIGNALING_BY_NTRK3_TRKC	17	-0.557262	-1.54417	0.0307475	tags=35%, list=9%, signal=32%	PLCG1/GRB2/PIK3R1/PTPRS/NELFB/BAX
IIZUKA_LIVER_CANCER_PROGRESSION_L0_L1_UP	IIZUKA_LIVER_CANCER_PROGRESSION_L0_L1_UP	14	-0.586185	-1.54306	0.0384322	tags=43%, list=17%, signal=36%	TUBB2B/DMD/RGPD8/ZFPL1/SULT2B1/FN1
BYSTRYKH_HEMATOPOIESIS_STEM_CELL_AND_BRAIN_QTL_CIS	BYSTRYKH_HEMATOPOIESIS_STEM_CELL_AND_BRAIN_QTL_CIS	60	-0.410915	-1.54293	0.0076271	tags=28%, list=13%, signal=25%	ARL6IP1/MED1/C5orf34/NOP10/CUX1/KLC1/GATAD2A/KMT2E/MNDA/SNHG6/DPP7/MRPL35/CCND2/ACAA1/PDXDC1/MRPL44/MYO7A
BIOCARTA_CDMAC_PATHWAY	BIOCARTA_CDMAC_PATHWAY	15	-0.566781	-1.53975	0.0326975	tags=53%, list=8%, signal=49%	HRAS/PRKCB/MAPK3/MAP2K1/RAF1/TNF/JUN/FOS
INGA_TP53_TARGETS	INGA_TP53_TARGETS	16	-0.564445	-1.538	0.0273262	tags=31%, list=15%, signal=26%	IER3/GADD45A/CCNG1/BAX/FOS
WP_ONCOSTATIN_M_SIGNALING_PATHWAY	WP_ONCOSTATIN_M_SIGNALING_PATHWAY	62	-0.403576	-1.53494	0.00885069	tags=19%, list=9%, signal=18%	VEGFA/CCN1/RAF1/STAT3/GRB2/PIK3R1/PRKCD/PTPN11/CEBPB/MAPK8/EGR1/FOS
BIOCARTA_RANKL_PATHWAY	BIOCARTA_RANKL_PATHWAY	14	-0.582953	-1.53456	0.0427365	tags=43%, list=6%, signal=40%	EIF2AK2/FOSL1/TNFRSF11A/IFNAR2/MAPK8/FOS
AMIT_EGF_RESPONSE_60_MCF10A	AMIT_EGF_RESPONSE_60_MCF10A	39	-0.442016	-1.53296	0.0186625	tags=28%, list=15%, signal=24%	IER3/TRIB1/GADD45A/CCN1/IER2/TPM1/BHLHE40/PTGER4/JUN/CXCL2/EGR1
BIOCARTA_DC_PATHWAY	BIOCARTA_DC_PATHWAY	17	-0.553183	-1.53286	0.0359726	tags=29%, list=13%, signal=25%	ITGAX/CD5/TLR7/IL5/CSF2
WP_ASPIRIN_AND_MIRNAS	WP_ASPIRIN_AND_MIRNAS	17	-0.552921	-1.53214	0.0359726	tags=35%, list=19%, signal=29%	NOS3/MIR98/VEGFA/PDK1/MIR32/MIR15B
WP_INITIATION_OF_TRANSCRIPTION_AND_TRANSLATION_ELONGATION_AT_THE_HIV1_LTR	WP_INITIATION_OF_TRANSCRIPTION_AND_TRANSLATION_ELONGATION_AT_THE_HIV1_LTR	32	-0.462714	-1.53037	0.0199173	tags=31%, list=13%, signal=27%	HDAC8/PPP3CB/NFATC3/HDAC7/CCNT1/NELFB/CREBBP/NFATC1/SP1/CDK9
KEGG_LINOLEIC_ACID_METABOLISM	KEGG_LINOLEIC_ACID_METABOLISM	25	-0.493398	-1.52946	0.0228189	tags=28%, list=5%, signal=27%	CYP2E1/PLA2G5/ALOX15/CYP2C8/CYP2J2/PLA2G10/CYP3A7
OZEN_MIR125B1_TARGETS	OZEN_MIR125B1_TARGETS	20	-0.524202	-1.52907	0.0225167	tags=35%, list=7%, signal=33%	CASC3/TP53INP1/STAT3/CBFB/CGN/LACTB/KCNS3
OUYANG_PROSTATE_CANCER_PROGRESSION_UP	OUYANG_PROSTATE_CANCER_PROGRESSION_UP	19	-0.530745	-1.52558	0.0180562	tags=26%, list=7%, signal=24%	STAT3/GRB2/JUN/CDC42/FOS
REACTOME_FCERI_MEDIATED_MAPK_ACTIVATION	REACTOME_FCERI_MEDIATED_MAPK_ACTIVATION	32	-0.460962	-1.52457	0.0211336	tags=31%, list=12%, signal=28%	FCER1A/LAT/PLCG1/GRB2/MAPK10/PAK2/JUN/MAPK8/FCER1G/FOS
REACTOME_ACTIVATION_OF_THE_AP_1_FAMILY_OF_TRANSCRIPTION_FACTORS	REACTOME_ACTIVATION_OF_THE_AP_1_FAMILY_OF_TRANSCRIPTION_FACTORS	10	-0.632893	-1.52435	0.0387303	tags=40%, list=5%, signal=38%	MAPK10/JUN/MAPK8/FOS
COWLING_MYCN_TARGETS	COWLING_MYCN_TARGETS	42	-0.428632	-1.52278	0.0298315	tags=55%, list=27%, signal=40%	HSPB2/GREM1/ANO4/DDAH2/IGFBP5/APH1B/RND2/AP1S3/LBH/FBLN5/DSEL/MFGE8/ODAPH/SPP1/PBX3/SYNC/GALNT9/TUBB2A/CPXM2/MYL5/TAGLN/ALPK2/COPZ2
ZAIDI_OSTEOBLAST_TRANSCRIPTION_FACTORS	ZAIDI_OSTEOBLAST_TRANSCRIPTION_FACTORS	12	-0.596764	-1.52215	0.029591	tags=25%, list=2%, signal=24%	JUN/NFATC1/FOS
FUNG_IL2_SIGNALING_1	FUNG_IL2_SIGNALING_1	10	-0.631785	-1.52168	0.0387303	tags=50%, list=5%, signal=48%	NOP56/MAT2A/CCND2/IL2RA/LTA
LEE_DIFFERENTIATING_T_LYMPHOCYTE	LEE_DIFFERENTIATING_T_LYMPHOCYTE	178	-0.340041	-1.52154	0.000809143	tags=26%, list=15%, signal=23%	TAGAP/INPP4A/P2RY8/TNFAIP8/NLRC3/PSMA3-AS1/SEPTIN6/TCF7/LEF1-AS1/AQP3/CCND3/LAT/PDE7A/ARHGEF6/LPXN/TRAPPC6A/TRIM14/SLA/SEC31B/KMT2E/ARHGDIB/RASSF5/CYFIP2/ARHGAP45/LTB/STX16/SRSF6/IFNAR2/NCKAP1L/CBX4/UBE2G2/SRRM2/CORO1A/GIMAP2/USF1/TMC6/SNX20/STAG3/ZC3H7B/C2orf68/TMC8/UBASH3A/CXCR4/SP1/PRKCQ/ICOS/LEF1
REACTOME_INTRINSIC_PATHWAY_OF_FIBRIN_CLOT_FORMATION	REACTOME_INTRINSIC_PATHWAY_OF_FIBRIN_CLOT_FORMATION	19	-0.529068	-1.52075	0.0186631	tags=53%, list=27%, signal=39%	GP9/SERPINE2/SERPINA5/F8/PRCP/VWF/F11/SERPING1/PROS1/F9
NEWMAN_ERCC6_TARGETS_UP	NEWMAN_ERCC6_TARGETS_UP	24	-0.497348	-1.52046	0.0261964	tags=25%, list=4%, signal=24%	TNFAIP6/DBF4/SRI/FABP5/CXCL2/ALX1
REACTOME_ACYL_CHAIN_REMODELLING_OF_PG	REACTOME_ACYL_CHAIN_REMODELLING_OF_PG	15	-0.557723	-1.51515	0.0412536	tags=20%, list=0%, signal=20%	PLA2G5/PLA2G10/LPGAT1
PID_P38_ALPHA_BETA_PATHWAY	PID_P38_ALPHA_BETA_PATHWAY	29	-0.473972	-1.51508	0.0347678	tags=24%, list=4%, signal=23%	PAK2/CCM2/FYN/MAP2K3/DUSP1/CDC42/MAP3K12
BIOCARTA_NKT_PATHWAY	BIOCARTA_NKT_PATHWAY	22	-0.508099	-1.51325	0.0321517	tags=18%, list=7%, signal=17%	CCL4/IL5/CXCR4/CSF2
GINESTIER_BREAST_CANCER_ZNF217_AMPLIFIED_DN	GINESTIER_BREAST_CANCER_ZNF217_AMPLIFIED_DN	314	-0.316189	-1.51151	0.000173995	tags=29%, list=17%, signal=24%	LEMD2/MBD3/PPARD/FNBP4/HAUS8/TRAF2/CCDC93/KAT8/IL17C/B4GALT1/ATAD3A/SUGP2/CDC42EP1/DPH7/HIP1R/MAPK11/HSF4/RTKN/SETDB1/MEF2D/ATAT1/TAF1C/SZT2/ARHGEF2/SF1/TSPAN14/ABCA7/HDAC7/HCFC1/SFTPC/KHSRP/ARPC5L/KMT2D/TPM2/ZNF202/DMWD/EHMT2/ZNF692/RABGAP1/ATF5/DOT1L/ABCC10/SEC31B/TEPSIN/RCC1/PDXP/GATAD2A/LIMK2/LPAR2/XPO5/APBA3/TNK2/QTRT1/U2AF2/RASSF7/TLCD3B/MARK2/ZMIZ2/NPM3/BAZ1B/HNRNPU/EPN1/TYW5/EVI5L/COPS7B/…
WP_BMP_SIGNALING_PATHWAY_IN_EYELID_DEVELOPMENT	WP_BMP_SIGNALING_PATHWAY_IN_EYELID_DEVELOPMENT	19	-0.524916	-1.50882	0.0223046	tags=47%, list=22%, signal=37%	FOXC1/MAPK3/FOXC2/NOTCH1/EGFR/JUN/SFRP1/PITX2/DKK2
WP_CANCER_IMMUNOTHERAPY_BY_PD1_BLOCKADE	WP_CANCER_IMMUNOTHERAPY_BY_PD1_BLOCKADE	22	-0.506464	-1.50838	0.0327641	tags=41%, list=15%, signal=35%	CD8B/NFATC3/BATF/STAT3/CD8A/PTPN11/NFAT5/JUN/NFATC1
NIKOLSKY_BREAST_CANCER_7P22_AMPLICON	NIKOLSKY_BREAST_CANCER_7P22_AMPLICON	33	-0.447865	-1.50749	0.0166065	tags=36%, list=15%, signal=31%	ADAP1/TNRC18/PSMG3/GPR146/C7orf50/FOXK1/SLC29A4/TMEM184A/LFNG/BRAT1/NUDT1/MAD1L1
PID_INTEGRIN_A9B1_PATHWAY	PID_INTEGRIN_A9B1_PATHWAY	23	-0.497594	-1.5058	0.0272973	tags=35%, list=11%, signal=31%	TNC/SPP1/VEGFA/ADAM2/ITGB1/ADAM15/FN1/CSF2
BIOCARTA_TCR_PATHWAY	BIOCARTA_TCR_PATHWAY	42	-0.422746	-1.50187	0.0352517	tags=31%, list=13%, signal=27%	PPP3CB/NFATC3/LAT/PLCG1/RAF1/GRB2/CALM3/PIK3R1/JUN/FYN/MAPK8/NFATC1/FOS
SARTIPY_NORMAL_AT_INSULIN_RESISTANCE_UP	SARTIPY_NORMAL_AT_INSULIN_RESISTANCE_UP	27	-0.474826	-1.50064	0.0327641	tags=26%, list=15%, signal=22%	FOSL1/PHLDA1/IER2/TUBB2A/TUBB6/BHLHE40/SLC25A28
BIOCARTA_CALCINEURIN_PATHWAY	BIOCARTA_CALCINEURIN_PATHWAY	17	-0.541513	-1.50052	0.0415067	tags=59%, list=13%, signal=51%	PPP3CA/CDKN1A/CALM1/PRKCB/PPP3CB/NFATC3/PLCG1/CALM3/NFATC1/SP1
YAO_TEMPORAL_RESPONSE_TO_PROGESTERONE_CLUSTER_4	YAO_TEMPORAL_RESPONSE_TO_PROGESTERONE_CLUSTER_4	15	-0.552333	-1.5005	0.0436983	tags=47%, list=13%, signal=41%	FKBP10/CCDC90B/RCC2/YBX2/DRD4/GALR2/FDPS
WP_16P112_DISTAL_DELETION_SYNDROME	WP_16P112_DISTAL_DELETION_SYNDROME	21	-0.507064	-1.5003	0.0372086	tags=19%, list=7%, signal=18%	GRB2/ATP2A1/RABEP2/C3
REACTOME_FCERI_MEDIATED_CA_2_MOBILIZATION	REACTOME_FCERI_MEDIATED_CA_2_MOBILIZATION	31	-0.454179	-1.49837	0.0324338	tags=68%, list=33%, signal=46%	GRAP2/VAV2/LYN/LCP2/VAV1/PPP3CA/CALM1/SYK/ITPR3/SHC1/ITK/AHCYL1/PPP3CB/NFATC3/TXK/FCER1A/LAT/PLCG1/GRB2/NFATC1/FCER1G
PID_NETRIN_PATHWAY	PID_NETRIN_PATHWAY	32	-0.452387	-1.49621	0.0241744	tags=44%, list=21%, signal=35%	MAPK3/MAP2K1/PTK2/TRIO/RHOA/PAK1/UNC5A/PLCG1/UNC5C/PIK3R1/DAPK1/FYN/AGAP2/CDC42
PID_IL6_7_PATHWAY	PID_IL6_7_PATHWAY	45	-0.417363	-1.49389	0.0179108	tags=22%, list=8%, signal=20%	LMO4/STAT3/GRB2/PIK3R1/PRKCD/PTPN11/JUN/CEBPB/IRF1/FOS
NIKOLSKY_BREAST_CANCER_16Q24_AMPLICON	NIKOLSKY_BREAST_CANCER_16Q24_AMPLICON	48	-0.412874	-1.49284	0.021662	tags=50%, list=27%, signal=37%	DBNDD1/RPL13/KLHDC4/CBFA2T3/ANKRD11/GAS8/VPS9D1/TCF25/SLC7A5/RNF166/IL17C/ZFPM1/MC1R/DEF8/ACSF3/BANP/GSE1/SPG7/CPNE7/PIEZO1/FANCA/TUBB3/CDK10/TRAPPC2L
BIOCARTA_HER2_PATHWAY	BIOCARTA_HER2_PATHWAY	22	-0.501141	-1.49253	0.0358261	tags=55%, list=27%, signal=40%	ERBB3/HRAS/SHC1/MAPK3/MAP2K1/CARM1/EGFR/RAF1/STAT3/GRB2/ERBB4/PIK3R1
REACTOME_INTERLEUKIN_RECEPTOR_SHC_SIGNALING	REACTOME_INTERLEUKIN_RECEPTOR_SHC_SIGNALING	26	-0.474712	-1.49156	0.0407253	tags=19%, list=7%, signal=18%	GRB2/PIK3R1/IL2RA/IL5/CSF2
BIOCARTA_RAS_PATHWAY	BIOCARTA_RAS_PATHWAY	19	-0.518529	-1.49046	0.0238219	tags=53%, list=21%, signal=42%	HRAS/MAPK3/MAP2K1/FOXO4/RHOA/RALGDS/CASP9/RAF1/PIK3R1/CDC42
DIRMEIER_LMP1_RESPONSE_EARLY	DIRMEIER_LMP1_RESPONSE_EARLY	59	-0.396774	-1.4887	0.0243227	tags=22%, list=8%, signal=20%	ZFP36/ICAM1/TNF/CCL4/GPR183/NFKBIZ/IER2/PPP1R15A/RPS9/NPPB/LTA/JUN/EGR1
PID_FGF_PATHWAY	PID_FGF_PATHWAY	53	-0.403573	-1.48599	0.0241052	tags=25%, list=10%, signal=22%	SPP1/PLCG1/IL17RD/HGF/GRB2/FRS2/SDC2/PIK3R1/PTPN11/JUN/PDPK1/KLB/FOS
BIOCARTA_ECM_PATHWAY	BIOCARTA_ECM_PATHWAY	18	-0.526629	-1.48119	0.0429127	tags=72%, list=25%, signal=54%	HRAS/GSN/TLN1/SHC1/MAPK3/MAP2K1/RHOA/ARHGAP5/MYL2/RAF1/ITGB1/PIK3R1/FYN
SUZUKI_AMPLIFIED_IN_ORAL_CANCER	SUZUKI_AMPLIFIED_IN_ORAL_CANCER	17	-0.53378	-1.4791	0.0451962	tags=53%, list=11%, signal=47%	CCND1/PTGDR/PTH/YAP1/BCL7A/EGFR/MMP7/CCND2/BCL9
PID_PI3K_PLC_TRK_PATHWAY	PID_PI3K_PLC_TRK_PATHWAY	36	-0.434098	-1.47816	0.0352474	tags=25%, list=9%, signal=23%	PLCG1/GRB2/TRPV1/FOXO3/PIK3R1/PRKCD/PDPK1/AGAP2/EGR1
TERAMOTO_OPN_TARGETS_CLUSTER_7	TERAMOTO_OPN_TARGETS_CLUSTER_7	18	-0.524635	-1.47558	0.0447387	tags=33%, list=10%, signal=30%	SPP1/MTHFD2/PPP1R15A/S100A6/TFAP2A/NFATC1
REACTOME_ROLE_OF_LAT2_NTAL_LAB_ON_CALCIUM_MOBILIZATION	REACTOME_ROLE_OF_LAT2_NTAL_LAB_ON_CALCIUM_MOBILIZATION	16	-0.541462	-1.47537	0.043263	tags=38%, list=12%, signal=33%	FCER1A/GRB2/PIK3R1/FYN/PDPK1/FCER1G
WP_AMPLIFICATION_AND_EXPANSION_OF_ONCOGENIC_PATHWAYS_AS_METASTATIC_TRAITS	WP_AMPLIFICATION_AND_EXPANSION_OF_ONCOGENIC_PATHWAYS_AS_METASTATIC_TRAITS	16	-0.541107	-1.4744	0.043263	tags=44%, list=13%, signal=38%	TCF7/NOTCH1/TNC/TCF7L2/VEGFA/CXCR4/LEF1
ZHU_SKIL_TARGETS_UP	ZHU_SKIL_TARGETS_UP	18	-0.524073	-1.474	0.0447387	tags=33%, list=10%, signal=30%	GADD45A/VEGFA/EGFR/PPP1R15A/MMP16/FN1
ZWANG_EGF_INTERVAL_DN	ZWANG_EGF_INTERVAL_DN	200	-0.323493	-1.47043	0.00248125	tags=30%, list=20%, signal=25%	ETFDH/DAB2IP/PSCA/RPAIN/RHOB/MED28/AKAP13/JAG2/DAPK3/HFE/RING1/CD248/OSBPL7/RTKN/ZBTB11-AS1/RALGDS/EHF/SOX7/TFAP2C/KLK10/SIN3A/CITED4/SNAI2/CDC42EP4/NINJ1/TRERF1/CLDN7/CPEB3/PLEKHH3/KAT6B/SCAPER/SFT2D3/HCFC1R1/ZFP36/AHNAK2/URB1-AS1/ZNF608/FAM214A/GABBR1/PIK3R1/METTL23/TMEM138/GABRB1/RETREG3/FNBP1L/PRKCD/REEP4/DAPK1/NDUFAF3/ZNF585A/BCL9/TMEM256/KCNS3/GIGYF1/ZC4H2/CEBPB/FGD4/IRF1/CDK9/AGFG2/MAP3K12
BIOCARTA_PTEN_PATHWAY	BIOCARTA_PTEN_PATHWAY	18	-0.521503	-1.46678	0.0459561	tags=33%, list=8%, signal=31%	EGFR/GRB2/ITGB1/FOXO3/PIK3R1/PDPK1
ZHAN_MULTIPLE_MYELOMA_MS_DN	ZHAN_MULTIPLE_MYELOMA_MS_DN	42	-0.412565	-1.4657	0.0400724	tags=50%, list=24%, signal=38%	NPAT/ZBTB26/RHOBTB3/CHD2/TAF1D/APOL1/HIKESHI/RHOA/MAGEC1/ZDHHC14/TKT/POLR1D/MTURN/LETMD1/TMEM126A/ANKRD49/DPP7/ISL2/ICAM4/ARHGEF12/MOB3A
WP_GASTRIN_SIGNALING_PATHWAY	WP_GASTRIN_SIGNALING_PATHWAY	111	-0.345682	-1.45785	0.0128037	tags=18%, list=9%, signal=16%	VEGFA/PLCG1/EGFR/RAF1/MMP7/STAT3/GRB2/ITGB1/FOXO3/PIK3R1/PRKCD/PTPN11/JUN/FYN/MAPK8/SP1/PRKCQ/CDC42/EGR1/FOS
KEGG_T_CELL_RECEPTOR_SIGNALING_PATHWAY	KEGG_T_CELL_RECEPTOR_SIGNALING_PATHWAY	100	-0.350186	-1.45665	0.011398	tags=19%, list=9%, signal=17%	NFKBIB/PLCG1/RAF1/GRB2/TNF/PIK3R1/CD8A/PAK2/NFAT5/JUN/FYN/IL5/NFATC1/PDPK1/PRKCQ/ICOS/CDC42/CSF2/FOS
OSADA_ASCL1_TARGETS_UP	OSADA_ASCL1_TARGETS_UP	45	-0.406348	-1.45447	0.0230281	tags=49%, list=24%, signal=37%	KLK1/IGFBP5/EDN3/RHOBTB3/BDKRB1/SMYD3/RAB3B/CALY/KRT14/JAG2/PPP1R16B/VDR/BMF/SEMA6A/RASSF4/LTB/RET/BDKRB2/LFNG/RAB37/GAS2/KLK3
REACTOME_METABOLISM_OF_STEROID_HORMONES	REACTOME_METABOLISM_OF_STEROID_HORMONES	32	-0.439114	-1.45231	0.0314752	tags=41%, list=24%, signal=31%	TSPO/CYP11A1/HSD17B3/SRD5A1/SRD5A2/SRD5A3/HSD11B1/CYP19A1/LHB/HSD17B14/STARD3/FDXR/HSD3B2
MENSE_HYPOXIA_UP	MENSE_HYPOXIA_UP	96	-0.354119	-1.4521	0.0148401	tags=22%, list=11%, signal=20%	HILPDA/GADD45A/TC2N/VEGFA/ASPH/ALDOC/HCFC1R1/LCORL/BHLHE41/SOD2/RBPJ/TIPARP/BHLHE40/PPP1R15A/GOSR2/PDK1/UFM1/CLK3/KDM4B/CEBPB/JMJD6
PID_ERA_GENOMIC_PATHWAY	PID_ERA_GENOMIC_PATHWAY	63	-0.378796	-1.4471	0.0206092	tags=27%, list=15%, signal=23%	LCOR/STAT5A/NCOA3/NCOA1/MED1/DDX54/LMO4/BRCA1/ATP5PF/NEDD8/DSCAM/DDX17/SET/JUN/CEBPB/PDIA2/C3
WANG_BARRETTS_ESOPHAGUS_AND_ESOPHAGUS_CANCER_DN	WANG_BARRETTS_ESOPHAGUS_AND_ESOPHAGUS_CANCER_DN	35	-0.423921	-1.43986	0.0316683	tags=29%, list=14%, signal=25%	GPX3/VAT1/ALOX12/ECM1/PAX9/RARG/TPD52L2/SULT2B1/FDXR/CRABP2
KEGG_FC_EPSILON_RI_SIGNALING_PATHWAY	KEGG_FC_EPSILON_RI_SIGNALING_PATHWAY	74	-0.366316	-1.43889	0.0171555	tags=24%, list=12%, signal=22%	FCER1A/LAT/PLA2G5/PLCG1/RAF1/GRB2/TNF/PIK3R1/MAPK10/PRKCD/FYN/IL5/MAPK8/PDPK1/FCER1G/MAP2K3/PLA2G10/CSF2
PID_ERBB1_DOWNSTREAM_PATHWAY	PID_ERBB1_DOWNSTREAM_PATHWAY	101	-0.344426	-1.43514	0.0125096	tags=19%, list=8%, signal=17%	CYFIP2/EGFR/ZFP36/RAF1/STAT3/GRB2/MAPK7/CHN2/PIK3R1/PRKCD/BAIAP2/PRKCZ/JUN/MAPK8/PDPK1/DUSP1/CDC42/EGR1/FOS
WP_PROLACTIN_SIGNALING_PATHWAY	WP_PROLACTIN_SIGNALING_PATHWAY	74	-0.364765	-1.4328	0.0180828	tags=20%, list=9%, signal=19%	NFKBIB/RAF1/STAT3/GRB2/ITGB1/NEK3/PIK3R1/SIRPA/PTPN11/JUN/FYN/MAPK8/IRF1/AGAP2/FOS
CHIARADONNA_NEOPLASTIC_TRANSFORMATION_KRAS_CDC25_DN	CHIARADONNA_NEOPLASTIC_TRANSFORMATION_KRAS_CDC25_DN	52	-0.389157	-1.43095	0.0334453	tags=25%, list=9%, signal=23%	TNC/IL1RL1/ZFP36/STAT3/MAN2A1/PROS1/CDO1/LY6H/IL11RA/CEBPB/CXCL2/C3/FOS
SCHLOSSER_SERUM_RESPONSE_UP	SCHLOSSER_SERUM_RESPONSE_UP	122	-0.334745	-1.42775	0.00938342	tags=23%, list=16%, signal=19%	NR2F6/SCAP/ZNF91/MAPT/S100A11/SFTPC/PIGQ/N4BP2L2/PPP1R11/LTB/MXD4/STX16/STAT3/YJU2/KLF12/STAT6/PTPRS/CRABP2/TNRC6B/KDM4B/ARHGAP35/RAMP2/SIPA1/CDK10/PDPK1/IRF1/DEPDC5/EGR1
WINZEN_DEGRADED_VIA_KHSRP	WINZEN_DEGRADED_VIA_KHSRP	95	-0.348074	-1.42482	0.0295735	tags=19%, list=8%, signal=17%	TFAP2C/ZFAND6/IL23A/CCN1/ZFP36/HAS2/TNF/GPR183/NFKBIZ/SDC2/SELE/PTGER4/CTSL/CXCL2/SMPDL3A/AMOTL2/CSF2/GPR1
WP_FAS_LIGAND_FASL_PATHWAY_AND_STRESS_INDUCTION_OF_HEAT_SHOCK_PROTEINS_HSP_REGULATION	WP_FAS_LIGAND_FASL_PATHWAY_AND_STRESS_INDUCTION_OF_HEAT_SHOCK_PROTEINS_HSP_REGULATION	39	-0.409508	-1.42022	0.0350293	tags=49%, list=23%, signal=38%	HSPB1/LMNB2/CASP3/FAS/NFX1/PAK1/IL1A/LMNB1/DFFA/CASP9/DFFB/ARHGDIB/MAPKAPK3/TNF/PAK2/CASP10/JUN/APAF1/MAPK8
WIERENGA_STAT5A_TARGETS_DN	WIERENGA_STAT5A_TARGETS_DN	175	-0.318193	-1.41943	0.0045043	tags=35%, list=24%, signal=27%	PLXDC2/NAP1L3/NFIB/HEXIM2/TREML1/TLN1/DCLRE1A/TTK/CD47/HGD/SLC9A9/ARMCX5/FAM30A/SBDSP1/GP6/PSRC1/COTL1/LOXL3/VWF/MS4A3/RUFY1/ADRA2A/BANK1/ZFPM1/CAPN11/MSRB3/ZYX/DNAAF3/GAPT/CTSG/NOTCH1/SELP/TPM2/FCER1A/FERMT3/BATF/ALOX12/PSTPIP2/TMEM44/ITGB5/LGALS12/MYLK/ANGPT1/ACOT11/RBPMS2/PROS1/UBASH3B/CORO1A/ACRBP/XYLT2/CAVIN2/NDUFAF3/WASF3/LYZ/TMC8/PPM1F/TCEAL1/CXCR4/FCER1G/CLCN2/USP20
KIM_BIPOLAR_DISORDER_OLIGODENDROCYTE_DENSITY_CORR_DN	KIM_BIPOLAR_DISORDER_OLIGODENDROCYTE_DENSITY_CORR_DN	82	-0.354605	-1.41774	0.0246759	tags=20%, list=11%, signal=17%	DTX2/TRPV6/IL1RAP/PRSS8/TNF/UPK3A/LFNG/LHB/SLC5A2/SULT2B1/SLC7A2/LTA/IL5/CCIN/ICOS/ALX1
PID_CDC42_PATHWAY	PID_CDC42_PATHWAY	68	-0.366865	-1.41728	0.0221011	tags=35%, list=19%, signal=29%	CDH1/CBL/APC/ARPC2/PAK1/F2RL2/PAX6/PARD6A/CDC42BPA/MYL2/ARHGEF6/DIAPH3/LIMK2/RAF1/TNK2/PIK3R1/PAK2/BAIAP2/PRKCZ/CFL1/JUN/MAPK8/MAP2K3/CDC42
JINESH_BLEBBISHIELD_TRANSFORMED_STEM_CELL_SPHERES_DN	JINESH_BLEBBISHIELD_TRANSFORMED_STEM_CELL_SPHERES_DN	278	-0.299384	-1.41676	0.00139803	tags=23%, list=16%, signal=20%	IL1A/LRRC37B/CCDC125/CDK5RAP2/H2AC8/TMEM17/ARL16/INPPL1/H2BC8/ZNF503/ABCA7/SALL4/LIME1/XYLT1/NISCH/BEGAIN/TRPV6/EIF5/RNU11/ICA1/C2orf88/MTHFD2/GSE1/WDR74/CHTF18/LINC00957/PPA2/CCN1/CYFIP2/PIDD1/CHST3/PTP4A2/C2orf69/ZNF557/NRDE2/TMEM191A/AKAP7/IL17RD/HNRNPU/PER2/DPP7/BHLHE40/TMEM191C/PPP1R15A/CBX4/JHY/NDUFAF7/NUDT1/GRIPAP1/GLUL/AIRE/UPF2/FMC1/FCAR/UGP2/EID2B/NPIPB13/ZNF682/ARAP1/TDG/DUSP1/EGR1/GPR…
WP_IL5_SIGNALING_PATHWAY	WP_IL5_SIGNALING_PATHWAY	39	-0.408194	-1.41566	0.0368893	tags=23%, list=9%, signal=21%	RPS6KB2/RAF1/STAT3/GRB2/FOXO3/PIK3R1/PTPN11/JUN/FOS
PID_SHP2_PATHWAY	PID_SHP2_PATHWAY	55	-0.376926	-1.40144	0.0436096	tags=25%, list=10%, signal=23%	FRS3/NTRK2/VEGFA/LMO4/EGFR/RAF1/GRB2/FRS2/ANGPT1/SDC2/PIK3R1/PTPN11/IL2RA/ARHGAP35
HOFFMANN_SMALL_PRE_BII_TO_IMMATURE_B_LYMPHOCYTE_UP	HOFFMANN_SMALL_PRE_BII_TO_IMMATURE_B_LYMPHOCYTE_UP	63	-0.365145	-1.39495	0.0282422	tags=41%, list=25%, signal=31%	PRTN3/RBMS2/MYOG/ISYNA1/HLA-DRB1/MS4A1/NCF4/PLD4/DAD1/MFHAS1/CNR2/IFI30/VEGFB/CTSH/NEDD4/ABHD14A/LTB/ICAM1/PRPS1/LHB/CCND2/LEFTY1/LY6H/CD22/CXCR5/SIPA1
WP_HAIR_FOLLICLE_DEVELOPMENT_CYTODIFFERENTIATION_PART_3_OF_3	WP_HAIR_FOLLICLE_DEVELOPMENT_CYTODIFFERENTIATION_PART_3_OF_3	83	-0.348898	-1.39458	0.0244162	tags=19%, list=13%, signal=17%	LGR5/NOTCH1/FOXQ1/CD34/CUX1/PHLDA1/SOSTDC1/EGFR/RBPJ/KLK5/JUN/SFRP1/GSDMA/NFATC1/LEF1/FOS
GOZGIT_ESR1_TARGETS_UP	GOZGIT_ESR1_TARGETS_UP	133	-0.321527	-1.38607	0.0172985	tags=31%, list=21%, signal=24%	ADAMTSL4/THSD7A/FHL2/ALDH3B1/PIM1/REEP6/TH/GAS1/KRT14/WNT4/PMEL/GRHL1/PKDCC/PRKAG2/TNFAIP8/MICAL2/SEPTIN6/AGXT/VWDE/TCF7L2/DPEP2/PC/SLC18B1/ASPH/ADIRF/ITSN1/ECM1/NMRK1/C11orf86/SLC25A37/PTGER4/SRI/FYN/PALM/CYP26A1/FSD1/TFAP2A/NASP/SMPDL3A/DOCK10/FOS
WP_ANDROGEN_RECEPTOR_SIGNALING_PATHWAY	WP_ANDROGEN_RECEPTOR_SIGNALING_PATHWAY	88	-0.338107	-1.36682	0.0345008	tags=32%, list=21%, signal=25%	RNF14/FHL2/TGFB1I1/PTK2/RHOB/RHOA/CARM1/PLPP1/RLN1/SUMO1/RAN/NCOA3/SIN3A/NCOA1/EFCAB6/LIMK2/BMF/PIAS4/EGFR/BRCA1/STAT3/PIK3R1/CREBBP/JUN/SP1/CDC42/NR2C2/KLK3
MANNE_COVID19_NONICU_VS_HEALTHY_DONOR_PLATELETS_UP	MANNE_COVID19_NONICU_VS_HEALTHY_DONOR_PLATELETS_UP	130	-0.317951	-1.36434	0.0250904	tags=22%, list=15%, signal=18%	AMHR2/P2RX4/KLF1/EXOC3L4/IFITM3/ALS2CL/MVB12A/TPRN/NRSN2/TSPAN4/CMTM7/LRP3/LPAR2/LMO4/SLC25A37/ASIC4/TIMM10/PSPN/SMIM1/FLYWCH1/ZNF296/TGIF2/MSRB2/ODF3B/COX10/FKBPL/RSAD2/FDXR
ACEVEDO_LIVER_CANCER_DN	ACEVEDO_LIVER_CANCER_DN	496	-0.274824	-1.35954	0.000531681	tags=20%, list=16%, signal=17%	ITIH1/ATP6V1B2/CENPV/ZDHHC14/TP53INP1/NDFIP2/ZNHIT1/IER3/SKAP1/OAF/ZFPM1/AMBP/PRKAG2/WFS1/NAT2/HOOK1/RXRA/TMEM30B/CYP2E1/TRIB1/ASCL1/NMT1/OGDHL/ARL6IP1/TRIR/KHSRP/HMGCL/ARG1/DERA/CPED1/SLC25A23/PDXK/NUCB1/SECISBP2L/TRAPPC6A/ATF5/TCIM/PBX3/TRIP6/TCEA3/PHLDA1/CPEB3/GSE1/RAB26/HIPK2/ANXA10/ADIPOR2/CCN1/FAM32A/CYGB/C9/ZFP36/EIF2AK1/ITIH2/NRDE2/SHFL/MPC1/CNNM3/ZG16/PSMB10/GSDMB/HSD3B7/SRSF6/PLEK2/ACCS…
BIDUS_METASTASIS_DN	BIDUS_METASTASIS_DN	132	-0.31234	-1.34136	0.0231498	tags=27%, list=10%, signal=25%	AKAP13/GSDMD/PTP4A3/PRRX1/INSYN1/RIN2/PRAG1/TMEM50B/VWA5A/CD34/TSPAN4/SLA/NEIL2/RND1/ZBTB20/RASSF4/PARP10/NHS/RASSF7/SLC25A37/KLHL22/SIL1/SIRPA/GABARAPL1/UBN2/CORO1A/PWWP3A/EP400/MKKS/NUDT6/REXO1/SECISBP2/NALCN/PARP8/ARHGAP6/TBC1D8B
REACTOME_ION_CHANNEL_TRANSPORT	REACTOME_ION_CHANNEL_TRANSPORT	172	-0.301462	-1.33948	0.0162956	tags=26%, list=19%, signal=21%	ANO9/ATP1B3/TRPM3/ATP1B1/UBC/SLC9C1/ATP2B3/ATP6V1B2/RIPK1/ATP6V0A1/TRPV4/CAMK2D/CASQ1/RPS27A/ATP13A4/ANO1/NEDD4L/SLC9B2/ATP6AP1/TRPV6/ANO8/ATP6V0A4/ASPH/PDZD11/SGK2/ATP6V1G3/RAF1/MCOLN1/TRPM2/ATP2B1/ASIC4/TRPV1/ANO5/ATP2A3/ATP6V0E2/ATP2A1/SRI/TRPC7/SLC9B1/NALCN/MLKL/ASIC3/CLCN2/ANO7
TONKS_TARGETS_OF_RUNX1_RUNX1T1_FUSION_ERYTHROCYTE_UP	TONKS_TARGETS_OF_RUNX1_RUNX1T1_FUSION_ERYTHROCYTE_UP	143	-0.305322	-1.32556	0.0359941	tags=25%, list=18%, signal=21%	JAG2/PTP4A3/ENPP2/HOMER3/PPARD/PXDN/COL1A2/TMEM176A/P2RX4/ARL4A/VAT1/SSBP2/TLR2/CLEC5A/FABP3/TCF7L2/NUPR1/IL1RAP/ANXA2P3/LRP3/ECM1/CPM/DHRS9/TLR7/TUBB6/DNAJB2/TNFRSF21/SELENOP/RBPMS/CTSL/FCAR/JUN/TASL/PALM/LAIR1/DKK2
BLANCO_MELO_HUMAN_PARAINFLUENZA_VIRUS_3_INFECTION_A594_CELLS_DN	BLANCO_MELO_HUMAN_PARAINFLUENZA_VIRUS_3_INFECTION_A594_CELLS_DN	107	-0.317073	-1.3247	0.0327265	tags=19%, list=11%, signal=17%	ZNF837/ADH6/RNF208/PLEKHH3/RAB26/CHTF18/TMEM191A/SLC29A4/A4GALT/FOXD2/HSD17B14/FCGBP/SLC26A1/TUBB4A/RAB37/FAM86B3P/ARHGAP33/ARHGEF16/VWA1/CAPS
WP_BRAINDERIVED_NEUROTROPHIC_FACTOR_BDNF_SIGNALING_PATHWAY	WP_BRAINDERIVED_NEUROTROPHIC_FACTOR_BDNF_SIGNALING_PATHWAY	137	-0.30343	-1.30995	0.0390141	tags=18%, list=10%, signal=17%	SPP1/FRS3/NTRK2/PLCG1/RAF1/STAT3/GRB2/MAPK7/FRS2/FOXO3/PIK3R1/MAPK10/RANBP9/SIRPA/PRKCD/PTPN11/CFL1/JUN/FYN/GRIN1/MAPK8/PDPK1/CDC42/EGR1/FOS
ACEVEDO_NORMAL_TISSUE_ADJACENT_TO_LIVER_TUMOR_DN	ACEVEDO_NORMAL_TISSUE_ADJACENT_TO_LIVER_TUMOR_DN	332	-0.267038	-1.28876	0.0123801	tags=21%, list=16%, signal=18%	SLC7A5/MAOA/SNRNP25/PRADC1/CENPV/NDFIP2/ZNHIT1/OAF/APH1A/ZFPM1/SLC25A22/TMEM160/RXRA/TST/TRIB1/NMT1/POGK/HAGH/NINJ1/UBAP1/PDXK/CENPX/HAAO/NUCB1/TRAPPC6A/ATF5/ADH6/PBX3/GSE1/ZNF281/HPR/ANXA10/LPIN2/CYGB/RND1/MAPKAPK3/ZNF689/MXD4/EIF2AK1/TTC39C/MRPS18A/GSTA1/ZNF672/ROMO1/HSD3B7/PRDX5/PLEK2/MRPL24/SNRPF/RPL36AL/CNDP2/HPS6/ATP6V0E2/PPP1R15A/LINC01554/HSD17B14/SSU72/DYNLL2/TEF/ANGPTL3/BPHL/CPSF1/GNPTG…
JINESH_BLEBBISHIELD_VS_LIVE_CONTROL_UP	JINESH_BLEBBISHIELD_VS_LIVE_CONTROL_UP	360	-0.263972	-1.28482	0.0169515	tags=22%, list=16%, signal=19%	SLC7A5/LRRC37B/KRT20/CCDC125/H2AC8/TMEM17/ARL16/INPPL1/MCF2L-AS1/IKBIP/ASNS/H1-0/H2BC8/DEPP1/MC1R/HROB/ARL4A/ABCA7/SALL4/LIME1/NOTCH1/XYLT1/BEGAIN/EIF5/RNU11/GADD45A/NUPR1/SLC26A11/ICA1/SPP1/CCDC130/WDR74/CHTF18/LINC00957/PPA2/CCN1/CYFIP2/PIDD1/PTP4A2/TNK2/C2orf69/NRDE2/TMEM191A/IL17RD/SLC3A2/ZNF430/GSDMB/PPM1D/DHRS9/SAC3D1/HNRNPU/TMEM184A/COL7A1/INKA2/TMEM191C/ZNF296/CBX4/JHY/NDUFAF7/NUDT1/GRIPA…
BLANCO_MELO_COVID19_SARS_COV_2_LOW_MOI_INFECTION_A594_ACE2_EXPRESSING_CELLS_UP	BLANCO_MELO_COVID19_SARS_COV_2_LOW_MOI_INFECTION_A594_ACE2_EXPRESSING_CELLS_UP	155	-0.292085	-1.28249	0.0282308	tags=30%, list=20%, signal=24%	RASD1/SNIP1/C11orf96/LBP/SLCO5A1/CD200R1/PRR14/GRHL1/IL1A/FOXC2/FGG/FOXD3/IER3/NEURL3/BCL3/WRAP53/CIART/NR4A3/CLK1/IL23A/CREBRF/NBEAP1/LSMEM1/ZFP36/LTB/ICAM1/BHLHE41/TNF/SCARNA15/CCL4/NFKBIZ/RLF/IER2/FRS2/HNRNPU/CSF3/PPP1R15A/SELE/ARRDC3/SAA2/ZNF596/CXCL1/IRF1/CXCL2/EGR1/FOS
ZHOU_INFLAMMATORY_RESPONSE_FIMA_UP	ZHOU_INFLAMMATORY_RESPONSE_FIMA_UP	453	-0.254781	-1.25129	0.0174544	tags=22%, list=16%, signal=19%	PXDN/ABL2/SRGAP1/IL1A/PNPLA1/F2RL2/EPC1/B4GALT1/FSCN1/TDRP/SVEP1/IER3/HSPB7/KMT2A/UTS2/STAT5A/MAPK11/GPR84/FOSL1/ZCWPW1/HTRA3/BTBD9/ESCO2/TRIP10/SLC1A2/FPR2/P3H2/TLR2/CA13/TP53AIP1/HOXB-AS3/NEDD4L/NINJ1/IL23A/DTX2/HTR7P1/DDR2/P2RY1/TMOD4/DOT1L/BRINP1/PLEKHH3/VEGFA/CCL18/FGFR1OP2/LIMK2/SSX4/STMN4/OTUB2/SEMA6A/EGFR/HAS2/FFAR2/NHS/ICAM1/TNF/CCL4/VCX/ATP2B1/ANP32D/HMGCLL1/HPN/TLR7/RAPGEF2/NIPAL4/KCNA…
BROWNE_HCMV_INFECTION_48HR_DN	BROWNE_HCMV_INFECTION_48HR_DN	444	-0.244074	-1.19679	0.0426206	tags=32%, list=25%, signal=25%	GOLIM4/SIX1/PRRG2/HRAS/PTPN21/LIMS1/GALE/FCMR/GJA1/C1orf21/RNF216P1/NAP1L3/NFIB/RIF1/IGFBP5/CRHR2/KRT5/VPS39/HSPG2/UBE3A/ENPP1/GABRA1/FADS3/PSMB8/C2orf27A/SULF1/DYRK2/ZHX3/FGF13/LPIN1/PLCD1/OPRK1/TGFB1I1/LAMC2/TBCD/SLC22A18/PSCA/REEP5/RAB3B/PTGDR2/GDF11/PRAF2/LPP/CCDC22/H2AC16/ENPP2/TRIO/CXCL12/VDR/CCL27/FBLN5/PRR3/HSPB6/PNOC/RIOX2/CXCL13/FAP/EML2/RNF41/SVEP1/SKAP1/CBY1/ITPKA/MAPK11/MTR/PTGER1/TD…
HELLER_HDAC_TARGETS_SILENCED_BY_METHYLATION_UP	HELLER_HDAC_TARGETS_SILENCED_BY_METHYLATION_UP	435	0.236855	1.166	0.0467626	tags=21%, list=16%, signal=18%	AKAP12/PAEP/L1CAM/CACNA1G/SEPTIN4/ASMTL/FTL/HLA-DRB4/ACSL3/SERPINI1/KRT18/SCP2/ZBTB18/ITGBL1/RNF128/CDC14B/MICALL2/ALDH1A3/ACOT7/SH3BGR/KIF5C/CTH/BEX4/BEX3/H3-4/ACADSB/KDM5B/GPM6A/DNAH3/CFH/KCTD12/CYP1B1/AGRN/G6PD/TFPI2/MAGEB2/AHR/UQCRFS1/SYN1/COL6A2/WDR7/EHHADH/TADA3/DDX4/FGFR4/SNAP25/TIMP3/RPS6KA2/ALCAM/DHRS2/FGFR3/RTN2/H2AC17/PLS1/TOP2A/TUBA1A/RAI2/TTLL1/SH3GL3/OAT/MAFB/NCAM1/DSE/PFN2/PRKAR2B/…
ONDER_CDH1_TARGETS_2_DN	ONDER_CDH1_TARGETS_2_DN	439	0.236865	1.168	0.0487365	tags=18%, list=14%, signal=16%	CD55/HOMER1/FERMT1/L1CAM/IL36G/CAMK2B/SPINT1/ST6GAL1/MYO1B/DUSP10/KRT18/KLK7/RNF128/KRT8/SCEL/CYB561/ALDH1A3/TMEM40/RHBDF2/NRG1/UPP1/KRT15/ELMO3/DDR1/DSG2/IGSF3/KAZN/IRF6/SNCA/B4GALT4/ARHGAP25/SLC6A15/AGRN/EPS8L1/QPCT/GNAL/SLC39A8/TFPI2/FAM169A/SERPINB7/HOOK2/MYO1D/ITM2A/MST1R/MPZL2/TIMP3/HS3ST1/ARAP2/FGFR3/LAMA3/IVL/MOB3B/CTSC/HLA-DOB/ITGB4/ERVMER34-1/SERPINA1/IFIH1/IL1R2/ADGRG1/CXADR/CD44/IL15R…
CHARAFE_BREAST_CANCER_LUMINAL_VS_MESENCHYMAL_DN	CHARAFE_BREAST_CANCER_LUMINAL_VS_MESENCHYMAL_DN	444	0.241753	1.19353	0.0464065	tags=21%, list=18%, signal=18%	NECTIN3/AKAP12/ITGAV/MXRA7/IGF2BP3/IGFBP7/STK10/DAB2/EYA4/TIMP2/CRTAP/PTX3/NRP1/HACD1/RBMS3/RAB34/DNAJB4/AKT3/UPP1/MCFD2/MIR100HG/PTTG1/AK5/MTCL1/FZD7/CCDC50/RTN4/BIRC5/KCTD12/NAB1/COL6A2/KLHL29/CAV1/GFPT2/PRNP/GRK5/PDGFC/BICC1/MAML2/DKK3/FBLIM1/PMP22/FAM20C/PFKP/CAV2/PRR16/NDEL1/ARHGAP21/CCDC88A/PRSS12/SNX7/CTSC/NR3C1/COL13A1/ADGRE5/CEP170/AIDA/FLI1/ACTG1/DSE/TUBB/CD44/KATNAL1/LTBP2/FBN1/TOX/CIB…
IVANOVA_HEMATOPOIESIS_LATE_PROGENITOR	IVANOVA_HEMATOPOIESIS_LATE_PROGENITOR	474	0.241236	1.1966	0.0453721	tags=22%, list=17%, signal=19%	TTC9C/POMK/MAP2K4/SLC25A33/KPNA1/WRN/ST7L/ZBTB18/TASP1/FCGR2B/NRP1/NEURL1/LPCAT2/NAPG/ABCA9/ALAS1/PITRM1/SLC38A5/ALG8/ALDH3A2/CLINT1/CCR2/MRPL50/USP14/BAZ1A/ACOT9/MRPS6/LYRM9/BIRC5/SLC39A3/ACER3/DOK3/HARBI1/G6PD/IDH1/NFU1/LY86/FASTKD2/EVI2A/AP3S1/WDR7/SLC15A4/ATRN/HAX1/MTFR1/SLC29A1/SPRING1/SMAP1/CPTP/GMPS/CCNC/SPOPL/ANKRD22/TMEM248/API5/CCDC127/CTSC/MSMO1/GBE1/CETN3/PTGR1/OAT/BCAP29/PPP2CB/PRDX3…
MEISSNER_NPC_HCP_WITH_H3K4ME2_AND_H3K27ME3	MEISSNER_NPC_HCP_WITH_H3K4ME2_AND_H3K27ME3	329	0.250906	1.19842	0.0386772	tags=27%, list=22%, signal=21%	MCIDAS/SULT4A1/HTR7/SPINT1/FOXD4/TBX3/MAP3K21/TBX1/KCNQ2/SIM2/SGPP2/RAP1GAP2/CRYBA2/ABCG1/ITGA3/TP73/WNT9B/SYNE3/OCLN/KIRREL2/SYT2/ACTL6B/FAM89A/DMBX1/RBFOX3/NOTUM/DMRT2/KCNK12/AHR/SRCIN1/AGPAT2/RASGEF1C/PRR16/GHSR/UNC5D/SLCO4C1/EGFLAM/SCN5A/COL13A1/KCNA3/FLI1/FAM155A/LTBP2/VSX1/SMOC2/CPEB1/EVA1A/MAL/ADAMTS2/PTF1A/PTGFRN/EIF4E3/TLX3/PPP2R2C/CPNE5/SLC30A10/STUM/GABBR2/ACAN/ATP2B2/WNT3A/PRDM16/LHX8…
YAGI_AML_WITH_INV_16_TRANSLOCATION	YAGI_AML_WITH_INV_16_TRANSLOCATION	391	0.247285	1.20219	0.0326842	tags=22%, list=18%, signal=18%	NF1/HTR7/ACOX1/F7/SPTLC1/IDS/MAP2K5/STK10/CUL1/RPL32/TIAL1/NLRP1/FKBP2/USP8/TRAF5/UBXN2B/PPT2/TMEM109/RPS4X/LGALS9/TAF4B/DHFR/BTAF1/DIDO1/RAD51C/TSHR/DNAH3/TPT1/OPRM1/HLX/DTNA/RPLP0/ZMPSTE24/FASTKD2/ADAM28/BCAM/MNAT1/PRNP/RPLP1/ITM2A/OTUB1/RPS18/PMP22/PFKP/RPL37/ZDHHC3/TOP2A/THOC2/ALDOB/USP19/NR3C1/TM9SF4/GAB1/PNN/PML/MTMR4/CDKN3/ATP6V0E1/XRCC4/DYRK1A/KIF23/ACAA2/ZFP69B/EZR/PNLIPRP1/OIP5/PPM1G/VI…
LINDGREN_BLADDER_CANCER_CLUSTER_3_UP	LINDGREN_BLADDER_CANCER_CLUSTER_3_UP	307	0.255524	1.21009	0.0348505	tags=29%, list=24%, signal=23%	GGH/AKAP12/ACOX1/ASS1/DAB2/TFG/STMN1/RAD1/IMPA2/TNFAIP1/CDK1/ALAS1/CCNE1/APOBEC3B/TMPO/USP14/MNS1/PTTG1/PGM3/RAD51C/UBA2/ANKRD27/BIRC5/ARRB2/SLC39A8/PXMP4/HMGN2/TINCR/PLAAT3/ACSL4/SIRT2/ZWINT/EXO5/MAD2L1/TOP2A/NEMP1/GNB3/PLK4/TEX30/KAT14/BCL2L1/PYCR1/ATP6V1C1/VAMP7/KPNA4/AKR7A2/BRIX1/KIF23/TRMT6/LINC00173/RASL11B/RNFT2/NETO2/CDKN2C/PRDX4/SHMT1/RAD18/INSIG1/FAM136A/RAD51/TRIP13/H2BC5/PRDX1/ZNF232/…
BOCHKIS_FOXA2_TARGETS	BOCHKIS_FOXA2_TARGETS	401	0.248574	1.21177	0.0288376	tags=27%, list=21%, signal=22%	F7/ZSWIM4/H2AJ/CLN8/PER1/DDX19A/RIBC1/FTL/PSEN2/AP3M1/DPM1/TIAL1/PLA2G6/PRCC/MERTK/CTH/SPZ1/TBL1XR1/PON2/CLEC4A/CRKL/FGB/UFD1/CYP2D6/TRAP1/KDM6B/CYP7B1/PANX1/C1R/HACD3/AKT1/IDH1/NFU1/SCARB1/GPRC5C/CHMP5/CYP3A43/SORD/AP3S1/CS/UROC1/MPZL2/FBP1/PLG/CFI/ALDOB/CTNNBIP1/ITM2B/TNFRSF1A/RSC1A1/CLEC2D/SERPINA1/GNL3/TERF2/HM13/TRIM13/ACSM3/GSTM1/KLF3/RDX/GRAMD2B/GYS1/APOE/CD276/TPST2/PRKDC/RPL39L/TTR/UOX/L…
DAVICIONI_MOLECULAR_ARMS_VS_ERMS_UP	DAVICIONI_MOLECULAR_ARMS_VS_ERMS_UP	325	0.255253	1.21851	0.0419372	tags=30%, list=24%, signal=24%	NF1/MXRA7/FRY/ASS1/PSEN2/ZBTB18/RAP1GAP2/IFT81/ABCG1/CDC14B/TNFAIP1/CYB561/ACOT7/TULP4/PITRM1/CLASP2/AKT3/DDR1/DHFR/ANKRD17/CTBP2/ACOT9/ARHGAP25/RNF11/ERP44/CHD7/MNAT1/FGFR4/AMZ2/DLK2/NPC1/FLVCR2/POLG2/HPRT1/HSF2/DTWD1/TSTD2/KCND3/NET1/CEP104/OAT/C14orf132/S1PR1/PRKAR2B/MTMR4/ROGDI/RNF38/TRIM37/SYN2/FRYL/PAIP1/DAG1/ARL3/NPEPPS/STX7/DST/CHRNB3/ARHGEF4/ACO1/THUMPD1/FBXL5/PRMT2/AGTPBP1/CSRNP2/DIPK1A…
MARTORIATI_MDM4_TARGETS_FETAL_LIVER_DN	MARTORIATI_MDM4_TARGETS_FETAL_LIVER_DN	486	0.245715	1.21867	0.0275665	tags=21%, list=16%, signal=18%	DHX29/CSF1R/CBX2/ABCF2/TBX3/MLLT1/SEPTIN1/HUS1/SLC16A13/TIMP2/EDEM1/GRB10/CTTN/TNFAIP1/COP1/PHF20L1/SCARF2/DDX3X/PCYT1A/FGB/IGDCC3/RBM28/PKNOX1/UFD1/DACT1/PRPF6/STK3/CCSER2/KAT2B/OTUD4/DCN/CNOT7/HACD3/FZD1/NAB1/SLC39A8/USP16/NUFIP2/ODF2/PPFIA1/FYTTD1/USP22/RCBTB2/EPB41L3/ATP11C/CAGE1/CTTNBP2NL/ALCAM/ERBIN/FBXW11/RWDD4/PLG/COL1A1/STAU1/SCYL2/TMEM248/CTSC/AKAP10/USP19/FUBP1/SLC38A2/SERPINA1/PDZK1/U…
RHEIN_ALL_GLUCOCORTICOID_THERAPY_DN	RHEIN_ALL_GLUCOCORTICOID_THERAPY_DN	357	0.252549	1.21957	0.0349174	tags=30%, list=22%, signal=24%	PRMT1/GGH/AKAP12/HMGB3/IGFBP7/STMN1/SCP2/HMGA1/BCL2/ITGB3BP/CHEK1/HACD1/COX11/CDK1/APOBEC3G/PSMD14/NSD2/VDAC1/DHFR/PTTG1/LAPTM4B/GAPDH/TPGS2/BIRC5/TPI1/GIMAP6/RPLP0/SORD/ALDH5A1/ECI2/HMGN2/MME/APEX1/RPA1/ADA/SH3BGRL/PRIM1/ZWINT/GMPS/PCCA/MRPL3/MAD2L1/HPRT1/CCT8/TOP2A/TUBA1A/CNBP/AKR1A1/NUSAP1/GBE1/PRDX3/FLI1/GCSH/TUBB/KCTD3/MRC1/IVNS1ABP/LDHA/CSNK2B/HSPA8/PRKDC/RPL22/MCTS1/ACAA2/IMPDH2/ATP5MG/ETF…
BENPORATH_ES_1	BENPORATH_ES_1	358	0.252637	1.22139	0.039882	tags=31%, list=22%, signal=25%	AEN/HOMER1/IGF2BP3/HMGB3/ST6GAL1/RAD54B/BRWD1/RCC1L/RAP1GAP2/HMGA1/CHEK1/KRT8/ABCE1/SPRY4/RRAS2/CDK1/KIF5C/ACTC1/AZIN1/BUB3/G3BP2/TMPO/DSG2/DHFR/DIDO1/FGF2/PTTG1/LARGE2/PLCB3/FZD7/MCM3/SLC13A3/BIRC5/GPR19/RBBP8/PRIM2/PRIM1/PTPN2/CACHD1/PLAAT3/SLC29A1/LGALS8/BOP1/MIS18BP1/GPC4/PIK3CB/NDUFAF4/CTSC/INTS13/FUBP1/PNN/GNL3/CXADR/TRIM24/LCK/IDO1/MAP7/NUDT21/HSPA8/BRIX1/ADD2/LGR4/PITPNC1/CSE1L/DNMT3A/SIN…
ENK_UV_RESPONSE_KERATINOCYTE_DN	ENK_UV_RESPONSE_KERATINOCYTE_DN	454	0.24746	1.22321	0.0263774	tags=29%, list=22%, signal=23%	TP53BP1/DNAJA1/MTMR3/IGF2BP3/PPP2R5E/CUL1/MBNL1/ACSL3/LUC7L3/ABCE1/ATR/RPGR/DHX15/HNRNPR/AZIN1/NRG1/BUB3/G3BP2/ACADSB/IGSF3/USP14/PIK3R3/STK3/PIP4K2B/GAPDH/UBA2/SQLE/VAMP4/AGL/YME1L1/SNRNP200/RNF13/RBBP8/SLC35A1/RCBTB2/COPB1/ZWINT/ZDHHC3/MRPL3/MAD2L1/KTN1/CD46/STAU1/TOP2A/KRAS/SNX7/MSMO1/AKAP10/IFI44L/GBE1/CETN3/TNFRSF1A/DKK1/TRIM13/IL10RB/GCSH/CXADR/CD44/MTMR4/LAMP2/RDX/CYB5B/RASA1/TM9SF2/RO60/G…
SENESE_HDAC1_TARGETS_UP	SENESE_HDAC1_TARGETS_UP	415	0.251439	1.22904	0.023091	tags=26%, list=20%, signal=21%	CD55/IGF2BP3/IDS/SMG7/MBNL1/HMGA1/PTX3/NFS1/CARNMT1/SERINC3/AKT3/DDX3X/UPP1/G3BP2/SUPT6H/TMPO/DSG2/PRPF6/NSMAF/CXCL5/PPTC7/OTUD4/SLC6A15/NAB1/AKT1S1/SLC39A8/AHCTF1/MAFF/USP16/DUSP7/SLC39A14/PRIM2/PRNP/SF3B1/LGALS8/UEVLD/NETO1/SLC7A6/FBXW11/SPOPL/VEGFC/SETD5/SCYL2/PLK4/LARS1/KIAA1217/MAX/CEP170/BCL2L1/CXADR/DLG1/CD44/PSAT1/SLCO4A1/KLF3/CCL3/SPAG1/CCL20/ABCC9/COBLL1/KDM1B/NFKBIA/SEC61A1/LSM12/MTAP/…
[truncated: 311 more rows]

## Sheet: D.Hallm Pea2_IGFBP6_Vs_Pea2_Ct
Table SIII. GSEA pathways and hallmarks in PEA1 IGFBP6 cells vs. PEA1 cells, and PEA2 IGFBP6 cells vs. PEA2 cells.
D, GSEA hallmarks in PEA2 cells treated with IGFBP6 vs. PEA2 Ctrl cells (adj P<0.05)
ID	Description	setSize	enrichmentScore	NES	pvalue	p.adjust	leading_edge	core_enrichment
[truncated: 2 more rows]
